# Supplementary material for: Combination Olaparib and Temozolomide in Relapsed Small-Cell Lung Cancer
Source: Oxford University Press journal article supplement (doi:10.1158/2159-8290.cd-19-0582), 2019-08-15
Supplement: 21598290cd190582-sup-222549_2_supp_5640698_p3h2px.xlsx [file 21598290cd190582-sup-222549_2_supp_5640698_p3h2px.xlsx]

## Sheet: Supplementary Table 4
Supplementary Table 4. Discovery set transcriptome sequencing for correlation with OT sensitivity.
Transcript Name	log2 (TPM+1) by Model
	MGH1518.3	MGH1505.2	MGH1546.1A	MGH1525.1	MGH1541.1	MGH1545.1A	MGH1557.1	MGH1512.1A	MGH1515.1	MGH1543.1	MGH1546.2A	MGH1546.1B	MGH1548.1	MGH1524.1	MGH1528.2	MGH1512.1B	MGH1501.1	MGH1523.1	MGH1514.5	MGH1504.1	MGH1514.2B	MGH1520.1	MGH1535.1	MGH1542.1	MGH1514.2A	MGH1514.1	MGH1538.1B	MGH1518.1B	MGH1518.1C	MGH1522.1	MGH1528.1	MGH1537.1
A1BG	0.535615	3.80892	3.4992	3.66726	3.9809	3.70518	3.09285	1.5049	3.19227	3.25015	3.54915	3.70752	3.24028	2.80799	2.61691	3.25035	1.49628	2.6033	1.20941	2.69051	0.613979	3.37729	0.0819498	2.52688	0.41623	0.185098	2.40593	1.37724	1.92942	0.0872976	2.79033	3.26588
A2ML1	0.0260982	0.0397054	0.0262912	0.0893133	0.0367457	0.179761	0.0287028	0.183574	0.0464461	0.0376967	0.0449813	0.0216601	0.00585984	0.0571034	0.0276843	0.000995585	0.0633373	0.0469747	0.0122269	0.0197456	0.108984	0.115361	0.0700824	0.00721523	0.0447427	0.0212713	0.0177968	0.024681	0.037813	4.49817	0.0726696	0.0689478
A3GALT2	0.76792	0.428811	1.10907	0.148974	0.256337	0.550427	0.261484	1.33232	0.911344	0.520048	0.525663	1.09921	0.345257	0.0405373	0.120571	0.961607	0.257817	1.33301	0.758957	0.276948	0.899914	1.10286	1.08712	1.14243	0.828206	0.373158	0.28545	1.41425	2.05535	0.364623	0.458017	0.357544
A4GALT	0.876936	2.32838	2.41668	0.0119153	0.332066	4.04786	0.916965	1.92248	4.95717	1.67505	2.51959	1.76157	1.44111	3.24125	2.97768	2.18853	1.16676	3.99216	3.42487	0.373393	3.89763	3.05984	3.8443	3.31322	4.5602	3.04717	0.213627	2.44643	3.92054	0.186713	2.2199	2.44211
AAAS	4.66596	5.89232	5.69015	4.83668	5.56412	5.12823	5.38618	5.31917	5.77768	5.7763	4.94949	6.12131	5.44039	5.85415	5.24998	6.00814	4.07156	5.73264	5.56456	5.80997	5.15294	5.60485	4.78846	5.98548	5.30357	5.15094	3.82421	5.28949	5.28309	5.62177	5.50026	5.62758
AACS	5.35487	3.88193	5.77408	4.18695	5.43404	4.73535	2.98443	4.82326	4.11928	5.40578	5.35927	4.95851	5.46131	4.68798	5.50935	5.00829	2.24435	5.70754	5.22149	4.79343	5.01196	4.42293	5.74635	5.93674	5.05153	5.20638	4.3937	5.28647	5.42698	4.80416	6.35021	5.5412
AADAC	0	0	0.0947159	0	0.0785311	0	0	1.45976	0	0.0244325	0.164916	0.298058	0.755884	0	0.033874	0	0	0	0	0.043203	0	0	0	0.0923299	0	0	1.49526	0.0855342	0	0	0.841021	0
AADAT	3.33636	3.08733	3.38918	3.5928	4.09093	3.17018	2.77413	2.63507	1.48071	3.71181	2.57975	3.13232	3.92618	3.83432	3.36282	3.2568	2.50898	2.8801	3.28382	1.86573	3.97156	3.22563	4.16473	1.98343	3.97425	3.72973	2.33392	3.69487	3.44951	0.28154	4.31226	2.06184
AAED1	0.846415	3.04554	3.93133	2.53227	3.16492	2.79105	3.31516	2.10215	3.86886	3.2653	3.35496	3.01247	2.20379	2.95651	3.32292	2.66279	1.43269	2.81514	4.09594	3.3294	3.97474	3.19998	4.03566	4.06306	3.83871	3.47985	2.81304	3.39467	3.2618	2.9836	3.55814	4.19307
AAGAB	4.82985	5.2046	5.04457	5.59029	5.27179	4.67416	4.84706	5.9141	4.57704	5.02275	4.53855	4.95592	4.48284	5.84285	5.14466	6.7059	4.36773	5.4152	6.15575	5.64282	5.48664	5.28359	4.78758	4.75077	5.46372	5.30425	3.99975	4.86568	5.08037	5.67745	5.45141	5.30327
AAK1	1.3215	1.90132	2.44536	2.34518	3.17849	2.8638	2.99122	1.78786	2.83309	1.89097	1.84966	1.89565	2.03763	2.89019	1.79132	2.14132	1.42964	1.62651	2.06594	1.90014	2.71936	1.68111	1.99129	1.70694	2.51166	2.46345	1.6581	1.92077	2.11116	2.06293	2.61677	1.98793
AAMDC	4.34699	4.19036	5.02073	4.52047	4.84882	5.49128	4.70501	3.89726	5.53933	5.32139	4.69231	4.78646	5.18312	4.96414	5.87994	4.83854	2.45673	5.29546	5.03498	5.62585	4.93057	4.82745	4.93747	7.03413	4.72625	5.09041	4.04154	5.61636	6.13378	5.40194	5.96153	5.42271
AAMP	5.81255	6.06358	6.62112	5.69568	6.25677	6.32657	5.89517	6.63521	6.65755	6.04003	5.88335	6.41246	5.78051	6.59639	6.0411	6.95873	4.75931	5.93184	5.47955	5.97944	6.16016	5.59119	6.98119	6.7148	6.26157	5.86875	5.04132	5.42817	6.05631	6.73789	6.37622	6.63941
AAR2	5.38771	5.01484	5.08647	5.08793	5.25752	4.66155	4.46327	4.94972	4.82884	5.08293	4.70216	5.2145	4.6178	5.4666	5.01308	5.12801	3.33597	5.05152	4.97534	5.05603	4.85537	4.92766	4.59679	4.79304	4.86998	5.12587	3.95859	4.78672	4.7935	5.41817	4.77691	4.70589
AARD	0.377669	0.309484	1.19486	1.10365	2.46943	0.581767	0.651261	0.469164	0.714231	1.99792	0.876746	0.696551	0.757204	0.844027	0.929235	0.655033	0.456569	3.77533	0.894559	0.403017	1.75192	2.22515	2.21936	3.03711	1.8258	1.7178	0.250625	2.11296	2.85904	0.454895	0.581873	0.981252
AARS	6.50725	5.55042	6.10663	5.986	5.38141	6.245	4.76145	5.29274	5.52125	5.90008	6.1804	5.78777	6.56823	4.7425	5.74462	6.04968	4.8627	6.14005	5.61662	5.01087	5.10434	5.26955	6.16313	5.5484	4.9542	5.0186	4.51718	5.53566	6.37114	5.51132	6.38231	7.88043
AARS2	3.58037	3.67528	3.84584	3.61787	3.8859	3.92613	3.71183	3.50531	4.2625	4.05827	3.9859	4.46494	4.09366	3.96629	2.85646	3.62867	2.57606	3.51495	3.60944	3.77966	3.60282	3.96029	3.30053	3.86575	3.52575	3.37881	2.64687	3.42262	3.40412	3.49902	3.77678	3.98473
AARSD1	4.58069	4.86044	5.29277	4.71098	5.39953	4.70119	4.46653	4.27175	4.80204	4.65135	4.68027	5.26677	4.6166	6.44469	5.12361	4.27456	4.39248	3.97306	3.95648	5.41915	3.95875	4.53765	3.60944	3.6828	3.90923	4.38006	3.34049	3.60401	3.86482	3.80381	5.46567	4.48852
AASDH	2.33889	2.99151	3.19691	3.23534	3.03088	2.61835	2.94265	2.41548	2.63203	3.02477	2.98878	3.1241	3.1896	2.49666	2.52898	3.38382	2.15844	2.2758	2.45941	2.95993	3.33283	3.09681	3.07117	2.64893	3.25041	3.3429	1.72492	2.83996	2.92207	3.23429	3.34287	3.19394
AASDHPPT	5.9872	4.65126	5.50565	5.27403	5.81295	5.19823	4.74522	4.31905	5.35324	4.11311	5.04937	5.51697	4.65383	6.06958	4.91882	5.57949	4.61626	4.16741	4.49318	4.7426	4.62592	4.01009	4.47471	5.42422	4.46632	4.66249	4.66669	4.64973	4.69065	4.97778	5.24027	5.22409
AASS	1.89101	0.893504	3.34095	1.61782	3.39115	1.01563	2.553	0.473015	1.05747	1.64247	2.3721	3.04664	2.34994	2.34529	0.485003	0.135348	0.0328194	1.71878	0.0241484	3.03068	0.834842	1.35432	1.43952	1.23405	0.810813	0.701384	0.247371	0.330184	0.085672	0.729309	2.86298	0.466197
AATF	5.08236	5.22404	6.07359	5.04541	5.15166	5.32089	5.37547	4.31997	5.48867	5.72989	5.19015	5.62063	5.0305	6.55211	5.2805	4.84676	4.30202	4.59197	5.76238	5.43797	5.22864	5.12532	4.63572	5.13985	4.92214	5.0828	3.05359	5.32497	5.17272	4.3845	5.68851	4.96328
AATK	0.0720063	2.59303	2.75471	0.55418	2.54859	3.25825	1.96919	2.94938	2.72738	1.37981	2.78861	2.30061	2.67161	3.9058	0.762344	2.10211	2.17045	2.65922	2.6418	3.38788	3.92638	3.00913	0.845737	2.51653	3.36272	4.4434	2.01235	2.17851	3.47311	0.269041	0.669507	1.0214
AATK-AS1	0	0.845296	0.713978	0.0215063	0.2394	0.89103	0.43108	0.494845	0.714752	0.411169	0.208827	0.587344	0.108539	1.27332	0.10703	0.191156	0.365334	0.725083	0.851878	0.181195	0.699442	0.660936	0.206587	0.573146	1.15162	0.589982	0.261865	0.0725374	0.525204	0.210055	0.143564	0.120318
ABAT	1.04393	0.92146	0.601394	0.725646	0.125793	4.15326	0.547693	2.61524	0.660241	3.10711	0.341837	0.254005	2.06438	2.5765	4.94	4.11148	0.44149	4.44473	6.3649	1.2104	6.81619	3.08511	4.82075	4.80084	6.39475	6.30759	1.51515	4.94142	5.81631	0.209553	5.34452	5.66756
ABC13-47488600E17.1	0	0.145775	0.653972	0	0.0839599	1.60306	0.0172427	0.585917	0.980572	0.0182848	0.51027	0.456347	0.053423	0.0488811	0.8178	0.570678	0	0.848395	0.741054	0.026758	0.769143	0.0625844	0.673171	0.122404	0.565227	0.860961	0.222497	0.231344	0.206125	0	2.43061	1.98787
ABCA1	0.457586	1.2825	0.95526	0.958113	1.49297	1.48384	1.87882	0.396564	1.17393	2.43917	1.08071	0.266631	0.684777	2.23279	0.978613	0.474982	0.164145	0.771557	2.80406	1.02462	3.79116	3.50956	2.71001	2.2613	3.71487	3.22767	0.63861	2.04686	1.38639	2.73027	1.67484	1.42983
ABCA10	0.499299	1.36306	0.739266	1.74496	0.666269	0.202694	0.0741836	0.596514	3.50496	0.911894	0.642375	0.0474852	0.847204	0.457817	0.130129	0.0628081	2.42988	0.463487	0.394673	0.0660594	0.37833	0.700329	0.0852554	0.198391	0.349668	0.15193	1.26428	0.656511	0.744043	0.0285266	0.321367	0.0616899
ABCA12	0.373536	0.269331	2.39073	1.12401	0.817859	4.12231	0.205219	0.790859	0.240901	0.45096	1.09851	0.19516	1.64561	0.555608	2.18503	0.463857	0.0484743	0.574557	0.062198	0.348138	2.99477	0.867223	5.26951	0.589833	2.94055	2.5076	1.51397	0.469084	0.822451	4.10067	3.95588	2.19239
ABCA13	0.0279872	0.158364	0.159641	0.0855094	0.267347	0.91391	2.06133	0.159954	0.270809	0.0345225	0.128436	0.0457738	0.823047	0.0664709	0.0299265	0.0672158	0.101247	0.0460181	0.238635	0.0146342	0.0696953	2.10301	0.0225407	1.16576	0.113838	0.162648	0.0422441	0.0245993	0.118103	0.0433795	0.047705	0.105304
ABCA2	2.14015	3.76892	4.61554	5.42849	4.93533	4.00901	4.24208	4.2854	5.66005	4.02894	4.2165	3.86292	2.80458	3.96757	3.68686	4.85917	3.88275	4.11983	5.21671	2.75259	6.16136	3.68455	5.90006	4.82821	6.1393	5.70985	2.54294	2.58997	2.74653	4.05875	4.40342	5.49503
ABCA3	5.48019	4.11332	4.75219	5.72613	4.38545	2.16616	5.16735	3.6885	3.42541	4.08228	4.28185	3.15399	2.91609	4.16639	4.16701	5.20178	3.1571	3.72366	5.00051	3.65951	5.18604	3.42038	4.16909	5.13611	5.35036	4.98495	3.96779	2.35129	3.95754	2.17078	4.34033	4.6757
ABCA5	3.39835	4.42029	3.69772	4.722	4.43238	3.3102	2.89444	1.78328	7.96357	3.98818	3.63098	0.614082	5.00639	2.80766	2.7731	1.36991	6.46236	3.5351	3.7285	3.66382	4.03547	3.66734	2.2934	3.60967	3.43029	3.2701	4.76747	4.30521	4.64623	1.86141	4.78927	3.26839
ABCA6	0.275178	0.637534	0.135333	0.589265	0.266322	0.0795361	0.0111121	0.710573	2.53253	0.320448	0.245299	0.0066197	0.709624	0.170997	0.0187371	0	2.09356	0.137178	0.162851	0.0430391	0.250036	0.110024	0.0286835	0.0533577	0.149891	0.0108631	0.500823	0.148799	0.190806	0	0.146743	0.0199129
ABCA7	3.57787	5.11687	3.29538	3.63105	2.87603	4.30209	1.88929	3.36502	5.67907	4.54972	3.12414	3.17108	4.23853	2.23342	3.42491	3.15871	2.71644	3.42818	4.49789	3.79396	4.7975	4.03927	3.24107	3.43952	4.50637	4.88241	1.96848	3.00214	3.25131	3.37361	3.90009	3.20827
ABCA9	0.921379	1.48254	1.57699	1.51682	1.11376	1.25126	1.13998	0.905541	3.77335	1.38318	1.74765	1.61713	1.7161	1.41523	0.452337	0.922159	3.34324	1.01541	1.01408	0.642143	1.51942	1.67757	1.25189	0.989527	1.3884	1.02694	1.08314	0.955507	1.15035	1.29888	1.29867	1.1831
ABCB10	3.74191	3.66969	4.28385	4.34978	3.8476	4.03871	3.55875	3.3748	4.07438	3.88031	2.89341	3.73648	4.0827	5.38312	4.21177	4.24509	3.38747	3.2663	4.82914	3.5964	4.78383	4.0906	4.2476	4.33879	4.65961	4.7326	3.9505	4.25728	4.32362	3.35988	4.37549	3.55038
ABCB4	0.0803723	0.038819	0	0.0383788	0.286195	0.0768221	0.00599324	0.688019	0.0352074	0.00741246	0	0	0.0980934	1.09191	0	0.0247728	0	0.00713871	0	0.0134055	0	0	0.0900261	0.0227809	0.0298361	0.0474368	0	0.297187	0.0944526	0.0139541	0	0.0211095
ABCB6	4.22417	4.57065	4.45979	4.02151	4.69129	5.35845	5.93922	4.60119	5.20347	3.2399	3.60342	4.87965	3.17999	3.50648	3.3835	4.1107	3.98466	2.99829	3.63845	4.28759	4.87219	4.47362	3.95791	4.50326	5.03946	4.46585	2.63479	3.32158	3.36518	3.98163	4.74767	4.71317
ABCB7	4.40644	4.47264	4.98036	4.61803	4.66952	4.91313	4.19969	4.01856	4.19101	4.50969	4.21339	5.68288	4.2639	4.46735	4.35351	4.26965	2.67978	3.64657	5.35471	4.05703	5.43318	4.07768	4.36692	4.48897	5.46048	5.26656	3.5608	5.29531	4.83022	4.12674	4.79369	4.04764
ABCB8	4.20699	4.20385	4.41084	4.98534	5.07724	5.0757	4.26839	4.52303	5.15474	4.08854	3.86238	4.47698	4.15049	3.98068	3.77779	4.84792	3.34858	3.75987	4.97125	4.62243	5.01828	4.87833	4.38914	4.12905	4.99458	4.86948	3.88946	4.15819	4.17935	4.51238	4.53756	5.03082
ABCB9	2.16747	3.28708	2.30236	2.65364	3.50296	3.32463	3.04884	2.14549	3.74857	1.873	2.53863	2.41797	2.7437	1.73039	1.53535	1.78445	1.60721	2.0918	1.68729	1.49137	2.01003	2.25628	2.96101	2.44631	2.22922	1.62925	0.842668	2.23941	2.19962	5.14346	1.76321	1.97469
ABCC1	3.27155	3.05772	4.12524	0.691272	2.92963	4.44204	4.66707	3.57278	3.00348	3.19732	3.47371	3.82054	2.97284	3.29573	2.30653	3.48645	2.00064	3.23203	3.83497	4.02183	3.9598	3.73825	4.34185	3.19343	4.11774	3.61889	2.64647	3.52049	4.09008	3.47056	2.25261	3.27561
ABCC10	3.1329	3.3316	3.35664	3.53311	3.30237	3.04433	2.55147	3.2773	4.55419	2.92764	3.29721	3.49626	3.60717	3.37186	2.49229	3.42319	2.5263	2.22247	2.98315	3.11124	2.80587	3.14178	2.89951	3.03241	2.71966	2.94503	2.41676	2.80304	2.87475	3.1219	3.42121	3.9115
ABCC12	0.0081976	0.550777	0.0388208	0	0.00913199	0.00454813	0.109343	0	0.0479317	0.0522684	0.0349942	0.0627572	0.0178228	0.0682444	0	0	0	0.0321088	0	0.17116	0.00917416	1.27045	0.00974009	0	0.0205156	0.00864121	0.0327496	0.0106874	0	0	0	0.0185801
ABCC3	0.130714	0.25578	2.03104	0.195109	0.0443826	2.27126	0.435031	3.41712	3.97573	0.214265	1.56173	1.91404	0.359967	0.0692969	0.111686	0.32244	0.318067	0.422824	0.764623	0.0591089	0.817649	0.706142	1.00038	2.9397	0.854869	0.560161	0.0620196	0.851124	0.90077	0.283531	0.175968	2.30574
ABCC4	1.94582	2.67343	1.62707	0.615565	2.16575	0.137609	3.8785	1.93977	4.30842	0.174219	2.97752	2.5409	0.916045	5.65581	0.204224	0.554229	2.33723	1.5314	0.396397	0.883046	0.440663	0.0961048	0.124586	3.10553	0.451032	0.473703	0.0770764	0.154605	0.216873	1.5157	1.51337	0.162999
ABCC5	4.57487	4.03913	5.58555	4.95358	5.97469	6.25396	4.49944	4.90365	4.6878	3.96287	5.20719	5.29663	5.39985	4.95462	3.14827	5.09254	3.35778	3.71656	4.27449	5.6157	4.90026	4.6036	5.83167	5.09035	4.78	4.78766	4.93019	3.79905	4.26581	4.05726	4.50651	4.11584
ABCC6	0.0533042	0.158522	1.08768	0.341785	0.0992343	3.2568	1.15854	1.23536	0.477332	0.712365	0.842637	0.371318	0.663386	0.831894	0.508967	0.0776864	0.0152158	0.701706	2.96508	0.851503	2.79267	0.875845	2.78862	1.11013	2.89458	3.73552	0.875529	2.97384	3.2554	0.189181	0.364701	3.32113
ABCC8	0.258935	0.74002	2.63931	3.02524	2.78664	2.87294	0.883721	2.12663	1.4541	3.1146	2.13884	2.35838	1.07374	3.10251	0.870282	3.04047	0.484575	4.76638	2.30237	2.02599	3.67404	2.99922	2.23098	3.82295	2.72507	4.13964	1.46161	3.97429	4.38834	0.633762	2.66862	3.46285
ABCC9	1.48771	2.1216	2.53809	2.2875	2.09362	1.57395	3.01523	1.6368	4.52966	1.61303	2.75507	2.65809	2.11429	4.96186	1.28703	1.27088	1.22048	1.59403	1.47982	1.23556	2.03736	1.52669	2.27623	1.59328	2.189	1.62687	0.89924	1.85857	2.18466	2.20333	3.04384	2.07243
ABCD1	1.4233	3.40799	2.80062	3.51208	2.22894	3.37153	2.9556	3.09081	2.92936	2.88758	1.71129	2.60709	2.06844	1.89588	2.35901	2.76056	1.85917	1.67922	4.34566	2.17295	3.98114	1.53433	4.92741	2.63665	3.98976	3.89756	2.09999	3.50152	3.63717	4.03918	2.69009	4.23991
ABCD3	4.71278	4.83505	5.40829	4.82314	5.15608	4.77357	4.30232	4.39319	4.47006	5.21957	4.68976	5.49582	4.82527	4.10099	4.3861	5.02444	3.41328	5.01969	5.1285	4.46588	4.9973	5.34283	4.6783	5.22499	4.74756	4.80724	4.08821	4.78625	5.00719	4.41319	5.13735	4.8789
ABCD4	3.47853	4.59826	5.5373	3.64557	4.64702	4.70112	4.12638	4.29202	4.44129	5.11493	4.82057	5.59384	5.39053	4.42295	3.79592	4.78302	3.16174	3.6098	4.59412	4.57475	4.66058	5.61559	4.65131	4.32134	4.55057	4.71458	3.11731	4.74867	4.90621	3.88752	4.74616	3.84317
ABCE1	5.60534	5.13393	4.93136	5.1646	5.41729	4.62008	5.44645	4.60768	4.77759	4.24064	4.46712	5.228	4.69223	5.32814	4.95709	5.08176	4.5148	3.60154	4.02396	4.66723	4.84959	3.95064	4.47135	4.61052	4.82073	4.51052	3.68866	4.32802	4.52397	5.77294	5.38488	4.4134
ABCF1	5.46047	5.80836	5.97933	5.29557	5.57913	5.83073	6.17138	5.89125	6.10712	5.95987	5.59486	6.28763	5.90582	5.89348	4.85268	5.8185	4.48269	4.74954	5.80778	5.83978	5.3918	5.6155	5.2202	5.65446	5.27152	5.46032	4.67006	5.20085	5.32939	5.32958	5.87078	6.03113
ABCF2	4.49835	4.34117	4.23572	4.32077	5.04805	4.55216	4.64386	4.33683	4.97418	3.85689	3.54286	4.29799	3.96027	5.02122	3.62415	4.41392	3.7391	4.04444	4.62398	4.16568	4.33348	4.27524	4.00441	4.66075	4.38068	3.9307	3.27868	4.31724	4.43034	4.28168	3.87196	4.59199
ABCF3	4.07678	4.25465	5.2929	4.88406	5.39762	5.28283	4.38001	5.10488	4.78268	4.62795	4.18246	4.96702	4.89578	4.25553	3.89148	5.10852	3.30311	3.936	4.71245	4.83095	4.61313	4.55108	4.95035	4.26426	4.53763	4.54166	3.98395	4.47942	4.65764	4.72346	4.78981	5.01228
ABCG1	2.95646	2.04443	1.5733	5.10302	3.06349	1.98131	0.475312	2.88123	1.05846	4.10342	2.88294	1.66679	2.77431	1.43643	3.64968	4.94253	0.621997	3.62973	4.20587	2.51221	4.68859	3.54306	4.33721	6.28855	4.63224	5.21879	2.45486	3.70928	3.84875	0.769899	3.1505	2.45056
ABCG5	0.228049	0.285762	0.325326	0.0212931	0.266723	0.101541	0.0182049	0.0653843	1.40878	0.165314	0.148183	0.168939	0.106873	0.678593	0.0706801	0.106835	0.816114	0.0449416	0.0625819	0.293796	0.0750176	0.0725708	0.0524501	0.0315092	0.139763	0.0518456	0.0382515	0.0414957	0	0.0877323	0.046692	0.069545
ABHD1	0.436906	0.637011	1.50782	0.39631	0.991327	0.250827	1.70634	0.595266	1.34924	0.753965	1.29736	1.60681	0.863827	0.359413	0.168149	0.199476	0	0.169948	0.294347	0.492649	0.531713	0.877745	0.0685493	1.40202	0.854603	0.628414	0.343895	0.522725	0.358857	0.493629	0.227311	0.254623
ABHD10	5.82627	4.98582	6.038	6.42473	6.37162	5.47605	4.21976	4.80195	5.91057	5.24562	4.67243	5.64403	5.96729	5.62066	5.55457	5.92077	3.56383	4.19977	4.81201	5.6214	4.25951	3.95512	5.15302	3.98809	4.0694	4.37954	5.47628	4.45964	4.46437	4.01112	5.7593	4.62085
ABHD11	4.89359	4.90339	5.19484	5.42473	5.06104	5.59469	3.38359	5.43623	6.39778	4.59839	4.39119	4.47804	5.01774	3.0359	4.3474	5.62351	3.22817	4.37938	5.81403	4.80068	5.85982	5.19437	6.19562	4.79115	5.48311	5.28954	4.26439	5.57523	5.85234	4.7262	4.99391	7.05913
ABHD12	6.22863	5.61391	5.9156	6.40635	6.14455	6.84907	4.60181	4.17512	5.80448	6.14328	6.32909	5.8735	6.21778	5.57294	6.41151	6.42731	4.16561	5.78335	6.47531	5.69111	6.65703	5.8786	6.28865	6.52488	6.45253	6.44055	5.78893	5.72953	6.13785	6.46063	6.82223	6.55003
ABHD12B	0.243724	0.555717	0.915367	4.0418	1.28051	0.585119	0.486546	0.680337	1.07132	0.688594	1.187	0.705186	0.562107	0.378175	0.43495	0.615441	0.252049	0.773595	0.597513	0.334915	0.61305	1.04019	0.229566	0.680348	0.832683	0.268827	0.442301	0.488538	1.08982	0.320438	0.736637	0.182869
ABHD13	4.12563	3.45824	3.94441	4.16509	2.56967	2.80973	3.53278	3.43436	3.37184	3.06092	3.36607	4.10201	4.74578	4.76072	5.0436	3.8907	2.74616	3.07409	3.67286	3.79786	3.50219	2.92682	3.44933	2.79583	3.24958	3.51067	3.28369	2.64829	3.22134	3.68375	5.58872	2.82132
ABHD14A	4.84088	4.42072	4.02928	4.42109	4.01673	3.62175	4.62119	3.19937	4.54496	3.39405	3.93032	4.34625	3.06879	3.62493	3.32137	4.25374	3.40908	3.31014	5.00667	2.37259	4.91263	4.34384	3.19496	5.03307	4.78656	5.13457	3.42174	3.77003	3.84657	2.53447	4.27991	3.19048
ABHD14A-ACY1	1.15152	0.320616	0.377773	0.872144	0.441271	0.441412	0.798521	0.785063	0.793849	0.469187	0.55987	0.462841	0.332051	0.260811	0.367971	0.538809	0.116393	0.616906	0.899375	0.360167	0.683079	0.859408	0.488376	0.931172	0.866898	1.30007	0.624218	0.702	0.869191	0.540941	0.55753	0.66414
ABHD14B	5.9941	3.55308	4.53815	5.0125	3.31108	3.53641	4.39733	3.78664	4.79051	3.23368	4.17478	4.33868	3.74203	3.04788	3.17006	3.58265	3.17291	3.95714	4.9606	2.33802	4.75377	4.54113	3.42574	5.08087	4.61736	4.84955	2.75309	3.45445	4.16353	3.6579	4.2533	4.21448
ABHD15	0.630918	2.41279	3.53736	1.84963	2.61569	2.84223	3.11683	2.44351	2.72482	3.17846	2.47061	2.57883	2.62867	4.67694	3.19173	1.89683	0.863986	1.57405	3.97058	2.63496	4.24612	2.09504	2.91119	2.78832	4.02411	3.99129	2.27993	1.53561	1.56634	1.71881	3.4315	2.83503
ABHD16A	4.3925	5.18206	4.94304	5.35916	4.76736	5.10778	4.12333	5.14103	4.67305	6.26988	4.91962	5.24444	5.70242	5.19202	5.28064	5.71796	4.30753	5.4344	5.79733	5.59507	5.85579	6.07523	5.77208	5.69038	5.94923	5.51096	4.31074	4.72989	5.2801	4.9724	5.63477	5.72123
ABHD17A	5.43055	6.20708	5.84787	5.90241	5.80137	5.51162	5.62578	5.3095	5.826	6.29235	5.40796	5.82141	6.1562	6.07107	6.37036	5.87129	4.42106	5.64471	5.65452	5.80612	5.9032	5.28786	5.21083	5.98335	5.64863	5.93844	5.4382	5.63462	5.49631	5.98975	5.73625	5.66879
ABHD17B	3.19314	4.45619	4.91672	3.84894	4.5627	4.41063	2.85318	3.91491	4.98883	4.7415	3.87848	4.03165	3.5212	5.08712	4.52752	4.98839	3.35192	4.20946	4.50861	4.88093	4.55355	4.24211	4.58619	4.57792	4.48981	4.08782	2.72339	4.30965	4.29519	4.01172	4.67259	3.42971
ABHD17C	4.5054	3.70239	3.52016	4.58788	3.17438	3.46674	3.51741	4.18425	2.9917	3.70308	3.69197	3.34744	3.95765	4.69251	3.55044	3.12309	3.52947	3.16332	4.45856	3.52999	5.81839	3.87428	3.68656	4.0781	5.18401	5.8611	3.31558	3.70404	4.39898	4.95172	3.78187	4.37312
ABHD18	3.26954	3.35402	3.14867	3.37491	3.61072	3.343	2.47236	3.00785	3.29316	3.12067	2.84098	3.02779	3.38023	2.68529	2.84745	3.42273	2.68545	2.74972	3.19447	3.20506	3.6058	3.2091	3.82536	3.28847	3.54915	3.40134	2.25323	2.83773	3.31263	3.43598	3.29668	2.81746
ABHD2	5.69862	3.86266	4.6822	6.35993	5.79458	4.46103	3.34296	5.94711	4.04707	4.20551	5.23337	4.17346	5.53516	4.53413	5.20872	5.40698	2.7102	5.38942	6.96311	5.89603	6.97984	5.32461	4.61929	6.23087	6.81196	6.96792	5.03108	5.13098	5.68657	6.843	5.78588	6.56707
ABHD3	4.88101	4.4802	4.9845	5.54363	4.14328	5.61695	3.47784	4.51659	5.15466	4.78976	6.09846	5.73107	6.30923	4.95039	5.70745	5.44326	3.85319	5.5253	5.20077	3.94411	5.56419	4.72432	5.80142	5.79586	4.60989	4.67253	4.26703	5.10855	5.85018	3.93881	6.18813	4.88612
ABHD4	1.44162	3.0073	4.19563	3.14981	3.40681	3.21749	1.85022	3.36734	3.2482	5.35118	3.08962	3.54315	4.42785	3.80665	2.84294	3.01304	1.21415	3.4796	3.38639	3.13722	3.48491	4.55187	2.95826	5.01575	3.50236	3.34673	3.10782	3.41368	3.57824	3.30939	3.56088	3.20918
ABHD5	3.65162	4.04564	3.5956	4.32609	3.81377	4.1939	3.91213	2.98658	3.82874	4.40457	3.51597	3.11544	3.32205	2.5328	4.11134	3.66729	1.72538	3.40947	5.02815	3.23779	4.60861	4.26119	3.6811	4.1731	4.29669	4.46626	3.60906	3.92519	3.61528	3.98457	4.11303	3.36867
ABHD6	2.15079	3.73414	2.35237	2.34752	2.47939	3.27695	3.4022	1.59786	3.07869	2.7002	1.96567	2.36064	1.45697	2.49781	1.56042	1.8631	1.6004	1.40962	4.30596	1.53354	5.50844	3.79386	4.99195	2.60685	5.01849	2.63408	0.921386	1.31441	1.9925	0.157012	0.352945	1.12098
ABHD8	4.53285	4.61449	5.00393	4.75817	4.93032	4.00074	3.77422	3.61295	3.42137	4.51113	4.31572	5.16047	5.38803	3.57853	3.87378	5.05102	2.50849	4.25745	1.58658	4.93931	2.24141	3.93444	2.97858	4.58378	2.19626	2.40702	4.52114	2.73122	3.76315	3.33426	4.65867	3.04825
ABI1	5.49845	3.83169	4.90475	4.95978	4.56023	4.81299	4.28285	4.88396	5.48459	4.25572	4.42108	4.24789	5.14868	3.67886	5.17784	5.2208	2.718	4.72011	5.2889	4.86741	4.98326	4.16762	4.97256	5.38512	4.81776	4.64579	4.22988	5.36768	5.50831	5.69272	5.59797	4.9921
ABI2	3.7776	4.62342	5.52124	4.63304	5.33788	5.02351	4.65288	4.84655	5.47922	4.74048	4.56429	5.50012	4.77223	6.12527	5.06989	5.71506	4.21721	5.84002	4.30477	5.11878	5.22387	4.56005	5.52779	5.29244	5.13255	4.8609	3.58795	4.47915	5.00367	4.9112	5.64026	4.14623
ABI3BP	0.0339613	0.0822423	0.338053	0.0487496	0.0974113	2.36748	0.0326729	1.1574	0.0239129	0.100433	0.119915	0.0493329	0.0682505	0.105071	0.0263764	0.938225	0.0193301	0.0413426	0.06255	0.388453	0.0220328	0.0817414	0.590751	0.0438506	0.0807573	0.433426	0.170945	0.124476	0.127757	0.0129775	0.0647984	5.03373
ABL1	3.83875	4.95657	5.34619	4.89806	5.90094	5.22587	4.89954	4.68897	4.87133	5.79205	4.77313	4.9549	5.13729	6.06651	4.84534	5.63574	3.60197	5.27813	5.49006	6.18015	5.28974	5.55371	4.9638	5.32031	5.38442	4.94912	4.47492	4.7391	4.8623	4.86634	5.76966	5.40242
ABL2	2.87428	3.07597	3.36215	3.20962	3.56695	3.14789	3.62016	2.41902	3.45891	3.20877	2.45741	3.30255	2.80021	4.26285	2.27067	2.74823	3.03961	2.43446	3.70877	2.73301	3.65495	3.2291	2.74803	2.57641	3.53645	3.05268	2.01417	3.12495	3.23046	3.37562	3.87301	2.84736
ABLIM1	4.55657	2.52995	4.07763	3.65206	5.55173	3.66383	3.38592	4.61675	1.7002	0.108356	3.42497	0.0118931	5.0624	2.27361	2.38224	3.68043	2.66877	4.46796	4.59263	5.2855	4.21576	2.46569	1.82304	4.54329	3.11319	4.01619	4.4485	4.89942	4.82968	4.20444	4.99275	3.62706
ABLIM2	0.785158	3.09821	3.24034	4.92272	2.85813	4.46947	1.04529	2.25329	2.91823	3.60637	3.78605	1.64692	3.87519	0.0666861	3.60637	4.39074	0.794559	4.11981	4.50425	2.66908	5.23706	4.03847	5.12408	3.62702	5.4291	5.1208	3.80256	3.765	3.98075	1.15707	1.85145	4.50133
ABLIM3	0.0805093	1.02721	1.03388	0.309181	1.0189	3.8498	0.435468	1.07449	0.0514974	2.40012	0.697675	0.0870648	0.0790526	1.60261	0.111929	0.484962	0.0668522	3.49917	3.5766	0.0827119	4.69365	1.57167	2.84539	0.0334017	5.26293	4.14768	0.0250821	2.93197	3.70929	0.581486	0.024661	1.43717
ABO	0	0.0300932	0.853036	0.0219553	0.225856	0.587166	0.0344857	0.987673	0	0.0569961	3.49526	0.0171699	4.30676	0.914917	2.88631	0.285081	0	0	0.0662924	1.48431	0.251217	0.178795	3.72279	1.6439	2.64379	0	3.43757	0	0	1.1512	5.1897	3.50494
ABR	4.36267	4.06009	6.18394	5.09063	6.3587	6.09912	4.1271	4.83668	4.45091	4.43928	4.88787	4.84846	4.76055	4.7088	5.46848	4.95834	3.14791	5.42361	5.18199	5.27906	4.57841	5.42004	5.98532	4.50479	4.40579	4.67144	4.07913	5.65411	5.91534	4.77189	5.83782	6.05874
ABT1	4.50325	3.68071	4.20359	4.29455	4.0931	3.79251	3.40716	4.23934	3.79686	3.96254	4.47767	4.2973	4.77102	4.07734	4.89624	4.95105	2.597	3.48546	3.90561	4.19594	3.52048	3.81018	4.1299	3.96638	3.27031	3.67205	4.34873	3.45844	3.34663	3.89593	4.78068	4.55033
ABTB1	3.29123	4.31917	5.10336	4.14453	6.08505	5.01598	3.69316	4.67428	3.91054	5.46487	4.14076	4.33769	4.63979	3.26085	3.64556	5.61184	1.71	4.79747	4.45328	4.65787	5.72548	5.86279	5.86052	5.60332	5.76268	4.89521	3.8877	4.76956	5.0069	2.47672	4.76146	4.24856
ABTB2	2.23073	2.72703	1.15894	0.435332	2.38223	2.90106	3.98731	3.80377	1.7995	3.58513	1.7035	0.622923	0.483519	1.31392	1.18336	4.70706	0.622016	3.79912	2.13699	0.912399	2.22333	3.03562	2.32275	3.80064	2.25723	2.41447	1.23198	3.44977	3.93703	4.25492	1.8245	2.04945
AC002310.11	0.427193	1.3199	1.13821	0.757388	0.562965	1.3896	0.496549	1.67278	1.00533	1.92614	0.552832	0.922567	0.655738	0.338621	0.996307	2.00836	0.424075	1.36762	2.28897	1.00824	2.16449	1.47722	2.60938	0.755538	1.38853	1.19569	1.49936	1.36257	1.36701	0.382776	1.01393	1.24934
AC002398.9	1.0832	2.98768	2.40258	1.45724	1.82307	2.09096	2.46529	2.08596	2.11407	3.25856	2.08255	3.19686	2.26508	2.37366	3.72519	3.25724	1.40765	2.14261	1.78868	1.36876	2.3996	2.43163	2.40645	2.07711	2.5488	1.90294	1.24732	2.16037	2.13268	1.63275	2.10795	3.58893
AC004076.9	0.133055	0.856317	0.558164	0.696149	0.745052	0.338333	0.585665	1.03988	0.0127829	0.455797	0.426266	0.318456	1.10786	1.21596	0.0744446	0.46915	0.433274	0.228118	0.468111	0.222784	0.734247	0.860007	0.413313	0.322018	1.13779	0.942413	0.393441	0.702911	0.335723	0.957495	1.21938	0.926276
AC004381.6	3.84643	3.36132	4.07152	3.68479	2.35412	5.19164	4.2337	3.54038	4.22981	4.06879	3.65819	3.41128	3.85009	3.77923	3.98407	4.86398	3.14049	4.10184	4.75982	3.20704	4.4671	3.49979	5.10221	4.39135	4.70608	4.55793	2.99155	3.55477	3.66534	2.8383	4.43378	4.20876
AC004754.3	0.226819	0.424847	0.752779	0.494659	0.130135	0.646085	0.140328	0.557084	0.444002	0.174637	0.412013	0.396768	0.18417	0.343683	0.619506	0.937448	0.135346	1.10487	0.297285	0.335086	0.486111	0.157374	1.72679	0.901482	0.627827	0.237528	0.453072	0.349056	0.648993	0.153659	0.457583	0.906896
AC005943.2	0.282233	0.528644	0.951876	0.996247	0.458211	0.49983	0.363222	0.885908	1.05292	0.93393	1.11716	1.12428	1.3672	0.548718	0.927946	1.12988	0.266037	0.818417	1.51248	0.775147	1.56741	0.285413	1.01602	0.547226	0.890822	1.9092	0.23048	2.37127	1.6639	0.750074	1.16492	0.53526
AC006116.20	0.494247	0.623832	0.615548	0.684143	0.916992	0.784953	0.747049	0.341731	0.855045	0.467731	0.933702	0.960536	1.15197	0.694073	0.267205	0.333076	0.330677	0.698606	0.588824	0.766451	0.595305	0.649924	0	0.327963	0.981088	0.920695	0.474764	0.141739	0	0.951261	3.34379	0.451043
AC006486.9	0.0459419	0.0437242	0.0237677	0.419442	0.0396747	0.413572	0.0364983	0.0415429	1.62542	0.430874	0.0245139	0.172862	0.215631	0.475189	0.02497	0.0351758	0.530167	0.67903	0.0500731	0.0409429	0.0438816	0.312397	0.495551	0.0247599	0.745383	0.278913	0.0192131	0.478039	0.0517355	0.887889	0.0308791	0.0234037
AC007906.1	0.156939	0.976649	0.914024	0.420699	1.35577	0.608698	0.905637	0.805989	0.538201	0.786902	0.30959	1.27589	1.08217	1.4692	1.03822	1.19527	0.306506	1.59716	0.78337	0.741663	0.726927	1.21976	0.997419	0.821227	1.14133	0.604679	0.291065	0.388966	1.35098	0.505773	1.569	0
AC009014.3	0.0769714	0.237242	0.132993	0.0645523	0.253823	0.644949	0.0690612	0.295601	0.0407527	0.38832	0.0470753	0.0609765	0.80986	0.332946	2.76371	1.02701	0	1.52902	3.54343	0.0397971	4.27167	0.548423	2.03111	0.460835	4.28454	4.43985	0.224167	0.323905	0.670482	0.0841073	1.13159	0.900259
AC009133.22	0.925895	0.112434	0.00666493	1.87963	0.00538721	2.33198	3.40819	0.890557	0.0499278	0.0836344	0.581537	0.00732474	0.0922965	0.706252	0	0.0585879	0.888646	1.20189	0	0.621888	0	0.239884	0.348308	1.11778	0.00260477	0.00485944	1.12308	0.0370168	0.0293199	0.0320503	0.00161474	1.43235
AC009336.19	0.195122	2.14861	1.92845	2.13185	2.12058	1.989	1.09284	1.00625	0.4802	0.59793	2.06317	2.39231	0.0268507	0.641674	1.62368	2.16369	0.155815	1.2104	1.52617	1.34893	2.77672	0.0837153	0.864606	0.0272341	2.39568	1.79711	2.04024	0.0305919	0.0350405	0.287185	1.84313	1.54359
AC009950.1	0.771609	0.0166736	0.113826	0.14234	0.108848	0.513105	0.340264	0.44508	0.114333	0.36213	0.0914954	0.0201687	0.194735	0.0108136	0.145451	0.0763322	0	0.419073	1.38864	0.478254	1.20778	0.472083	0.765289	0.266052	0.812479	1.16642	0.406958	0.570506	0.607907	0.468892	0.367793	0.46995
AC010547.9	0.658561	1.11437	1.59595	1.11859	0.925997	0.94074	0.473398	1.32169	0.955196	0.794604	0.765468	1.00908	0.778767	0.618237	0.886543	2.18745	1.04794	1.60557	0.842827	0.504895	0.594835	1.27053	1.21161	0.544034	0.651752	0.663734	0.504603	1.31868	1.31207	1.13368	1.73419	2.24164
AC010642.1	1.35793	1.72433	1.84733	1.06262	1.18004	1.49828	1.88283	1.20662	1.49238	1.49746	1.79518	1.86922	1.24825	1.036	0.692778	2.11437	1.08082	1.26831	0.962552	0.763172	0.7071	1.39578	1.23229	0.849322	1.06344	1.05492	0.939122	1.63018	1.85219	1.1887	1.27932	1.59621
AC013264.1	1.39917	2.21698	2.39338	1.07574	0.739107	2.93099	1.45587	0.888131	1.54643	2.54623	2.86256	0.924553	1.2778	2.38722	1.82458	1.53607	1.26063	1.99624	1.76373	1.45534	2.39485	2.42353	1.09163	2.92867	2.34064	2.52548	1.25884	1.56737	2.10003	1.7237	2.19152	0.361016
AC013461.1	3.60498	4.19758	3.65936	2.99442	3.28507	3.29555	4.86064	2.7001	3.38705	3.8743	3.92291	3.79694	3.87201	3.81782	4.18444	2.53827	1.23617	4.04506	3.18501	5.39878	3.79977	3.39104	3.09991	4.54013	3.911	2.90392	3.11754	3.40034	3.54476	3.87	4.71304	3.02625
AC023283.1	2.12486	1.57436	1.04187	0.82053	2.27699	3.11896	0.581006	2.22485	2.80235	1.26607	0.422284	0.605384	1.22907	0.710996	3.40641	2.45907	1.02792	1.08014	3.9813	2.10322	2.1193	1.39511	1.59251	1.43663	2.47642	2.59129	0.702854	2.17322	2.07569	1.6167	1.33239	3.16522
AC025335.1	2.00549	2.13323	3.51948	2.4328	3.25761	2.48006	1.12787	1.79246	2.72113	2.56106	2.55939	2.83646	2.35533	1.73969	2.51009	2.28276	2.3305	2.17486	1.51645	2.00543	1.83544	3.07879	2.00828	2.30688	2.31002	1.14785	1.67412	2.57299	2.35613	2.24994	3.23919	1.66739
AC026348.1	1.42228	1.94157	2.55007	1.98575	2.78824	3.02234	1.46834	1.80445	3.11155	2.63439	2.11359	2.05517	0.606663	2.12344	1.07918	2.32706	1.71369	1.70283	2.23517	2.74633	1.88918	3.01726	2.59576	1.19171	1.9027	1.86169	1.4579	2.15518	2.32316	1.1152	2.39349	2.32203
AC027682.1	1.2799	1.31492	1.03362	0.959257	1.30204	0.913258	0.725758	1.1364	0.970222	0.794334	0.706078	0.749701	1.24932	1.24684	0.64017	1.8505	0.601535	0.894625	0.660052	1.14822	1.25999	1.1374	1.36562	0.468999	1.31832	1.29038	0.62325	0.309099	0.565322	0.555435	0.9832	1.13245
AC068533.7	1.49683	0.529336	0.938969	1.39786	1.12217	1.55681	0.898303	1.45372	1.15444	0.65164	0.527909	0.642333	1.14083	0.985868	1.14556	1.57878	0.0563914	1.27473	1.31275	1.05025	1.28692	1.33256	3.5649	0.688194	1.17201	1.00293	0.701715	0.560696	1.17787	0.488857	2.05797	1.26558
AC084219.2	0.429047	1.03037	0.829378	1.02	0.631315	1.25209	0.821173	0.516031	0.773883	1.39523	0.778283	0.95768	1.11926	1.11499	0.782875	1.00496	0.378332	0.863384	1.03538	0.95384	0.912918	0.808048	0.698051	0.772496	0.768522	1.17484	0.668678	1.27834	0.876072	0.673912	1.1871	0.796493
AC090094.1	0.668165	0.320096	0.457318	0.376609	0.519386	0.782677	0.375313	0.532109	1.88988	0.311824	0.515017	0.338048	0.396859	0.178253	0.424784	0.424929	0.304425	0.717278	0.826448	1.27335	0.708715	0.43492	1.20901	0.486266	0.495117	0.834836	0.241496	0.79109	0.944019	0.541847	0.432451	0.735234
AC092835.2	1.24089	1.84361	2.38293	1.6481	2.57906	3.12547	2.57912	2.04263	2.54266	2.2663	1.79808	2.47202	2.27397	3.4341	2.11159	3.07948	1.17436	2.88747	1.76055	2.59103	2.75886	2.00349	2.40927	3.06291	2.58281	2.28219	1.51148	2.10703	2.65099	2.68577	2.24004	1.20541
AC092881.1	0.427475	0.356312	0.667458	0.789405	0.825177	0.986062	0.544717	0.343944	0.857161	0.461662	0.483301	0.773034	0.886505	0.592318	0.797725	0.218254	0.202556	1.10879	0.806447	0.297834	0.841074	0.754941	0.612632	0.548453	1.00783	0.6314	0.551967	0.959889	0.82674	0.58575	0.993477	0.785735
AC104057.1	0.00653438	0.0110306	0.078247	0.00481048	0.0112531	0.000915264	0.0221953	0.0409561	0.0016494	0.00644147	0.0113349	0.0268778	0.0130358	2.79786	0.047616	0.195504	0.00396608	0.0181034	0.0515109	0.00677974	0.0112746	0.0018225	0.00811831	0.00943878	0.02004	0.0152251	0.211027	0.00713746	0.0405701	0.0153232	0.443968	0.00628491
AC109829.1	0.470415	0.350961	0.246155	0.405637	0.775024	0.652185	0.531049	0.519603	0	0.153	0.159817	0.15567	0.386445	0.213026	0.13647	0.768941	0.140351	0.350426	0.580047	0.800467	0.731499	0.200572	0.652872	0.994044	1.11957	0.435589	0.269399	0.320794	0.672384	1.75007	0.5653	0.494333
AC127070.1	0.730299	0.440522	1.03604	1.07785	1.12024	1.4714	0.774088	0.748627	1.62623	0.680034	0.873948	0.880209	0.768416	0.581235	0.56128	0.748326	0.442032	0.621539	1.21759	0.538443	0.826631	0.61001	0.729195	0.759109	0.948551	0.608742	0.638834	0.83701	1.26229	0.921513	0.793086	1.95804
AC131097.4	0.674577	2.13239	0.87596	0.338346	0.482454	1.69758	1.69241	0.262763	1.05893	1.5256	0.938793	1.35357	0.324446	5.44875	0.163773	0.542639	0	0.175403	0.317285	0.644156	2.2676	0.655945	1.3611	0.270333	2.20622	0.831305	0.197095	0.240399	0.140004	0.692593	0.644064	0.471532
AC138969.4	4.91014	6.31613	5.86205	5.17767	4.50288	5.20037	5.7059	4.98519	4.73821	5.57178	5.59018	5.48278	5.43556	4.89418	3.89793	6.16898	5.19388	4.64057	6.45805	5.74048	7.26749	6.6293	6.62144	5.28058	6.74328	7.11288	3.09289	5.10964	5.96484	4.40233	5.84163	5.18419
AC241377.1	1.40485	0.237815	0.0370449	1.38672	1.11687	0.453165	0.35455	0.997419	0.19781	0.0144346	0.487204	0.2625	0.193731	0.727637	0.28291	1.80723	0.381795	0.249006	0.88825	0.457824	0.985116	0.356237	1.53414	0.0448053	1.22374	1.38169	0.42442	0.440313	0.348904	1.20331	1.13083	1.05123
AC241585.1	3.3741	0.838947	0.328291	3.91193	2.7352	1.22593	2.0755	2.31054	0.525776	0.164874	1.48804	0.346446	0.542302	0.373769	1.65647	2.68748	2.22073	0.552371	3.6057	1.85746	4.45386	1.60017	1.89546	0.442487	4.11458	4.75405	2.65311	1.36793	0.463762	1.10918	3.23297	3.34461
AC245100.1	3.12448	0.537047	0.0164984	3.1514	2.56312	0.432323	1.19776	2.03078	0.436258	0.0430612	0.387214	0.456792	0.251149	0.677194	0.749817	2.41048	1.44911	0.476169	1.79883	0.951994	2.8112	0.883478	1.18478	0.222613	3.08875	3.24474	2.33405	0.708717	0.30636	1.4793	2.26935	3.16613
ACAA1	4.27312	4.64349	4.37354	3.87407	4.14906	4.28219	4.18433	3.89519	4.31392	4.05013	3.94649	4.35405	3.38105	3.41472	3.31767	3.91317	3.22578	3.39638	4.64406	3.33942	4.54627	4.74457	3.29674	4.0006	4.37377	4.46401	2.78646	3.96224	4.1399	4.04399	3.69396	4.19705
ACAA2	5.85264	6.25184	7.0857	6.96862	6.54031	7.04832	5.23041	6.04636	6.2263	6.8137	6.51605	7.23865	6.66358	6.55705	7.03604	7.57693	5.45765	7.70575	6.01494	6.98559	6.66138	6.40708	7.93002	7.1563	6.0234	6.90242	5.57427	7.76547	7.93443	6.90364	6.23452	5.73491
ACACA	4.44329	3.72079	4.70561	4.79597	5.26678	4.48019	4.67549	3.79942	4.65837	4.19193	3.97118	4.27887	4.23365	4.96339	4.47412	4.43177	2.93857	3.78346	4.3145	4.23517	3.99974	4.16379	4.27811	3.89803	3.91568	4.13732	3.10937	3.48659	3.84978	3.74254	5.07771	4.86846
ACACB	0.0451089	2.32324	2.04924	0.187543	1.40969	1.89288	1.81992	2.25819	3.41042	2.23177	1.75937	2.00959	0.433104	2.45545	1.26617	2.51698	1.22068	2.7031	1.96014	2.03291	3.01171	2.57505	1.95772	3.04212	3.16403	2.10346	0.437868	1.47998	1.668	2.49604	1.47355	1.08651
ACAD10	4.0304	3.53442	4.17408	3.95374	4.15269	3.68266	2.88225	3.87076	3.93014	3.97759	3.60452	3.61627	3.52827	4.044	2.73624	3.96814	2.49711	4.48253	3.45474	3.48189	3.53055	3.91919	3.29432	4.08867	3.3859	3.46484	2.65555	3.14647	3.84735	3.71166	4.53915	3.51926
ACAD11	2.38324	3.37468	4.68285	3.49885	4.49337	4.31373	3.19414	2.92544	4.17171	3.28996	3.78679	3.43412	3.70897	3.42961	1.55167	3.6051	1.78738	2.94751	3.0174	3.67255	3.23127	3.84563	3.49663	2.95664	3.34347	3.38103	2.44015	3.59088	3.67048	3.51195	2.58949	2.21791
ACAD8	4.57782	3.71415	4.65701	4.41958	4.83346	4.4962	3.68648	3.94595	4.31458	3.24265	4.38623	4.25669	4.09323	4.87761	4.34798	5.23646	3.70218	4.342	4.63307	4.26056	5.1523	4.69735	4.84728	4.84826	4.88677	5.03514	3.12286	4.59847	4.64211	4.90422	4.66777	6.25118
ACAD9	4.95715	4.75309	5.45931	5.50841	5.60201	5.60468	4.17841	5.18232	5.33589	5.01831	4.74484	5.08508	5.34006	4.86571	3.04269	5.6554	3.23439	4.40032	5.23132	5.39164	4.92203	4.77126	5.53261	4.61875	4.82305	4.9822	4.66918	5.07695	5.09178	5.04622	3.4945	5.0016
ACADL	0.0503674	0.35992	0.444985	0.0951873	0.462087	1.71088	0.474375	0.0456732	0.0278589	1.65215	0.394355	0.0447713	0.0335287	1.70844	0.415864	0.249048	0.15242	0.242632	1.09243	0.206911	2.55448	0.0980979	0.302254	0.046231	2.86375	2.24618	0.0176668	1.3715	0.745489	0.0804498	0.893535	0.291545
ACADM	6.16046	5.30203	6.59931	5.05389	5.83261	6.31583	5.75469	5.33675	5.56705	5.89507	5.02334	5.98742	5.49859	4.61764	5.9036	6.62786	4.2661	5.28483	5.43241	5.20459	5.51777	6.11115	5.96777	6.12589	5.54053	5.26957	4.9135	5.79975	6.12995	4.9083	6.88826	5.69651
ACADS	4.30956	2.83032	4.27865	3.18027	3.7702	4.28655	3.17991	3.98653	3.73953	4.15736	3.26526	3.24738	3.94135	3.01305	4.36027	4.0639	0.824815	4.23311	3.80993	4.45454	3.82365	3.88496	3.9614	5.05171	3.77543	3.70987	3.07106	3.95997	4.01743	4.44939	4.31316	3.36291
ACADSB	3.8416	2.86058	3.46806	4.21906	2.21798	2.53939	1.99988	2.32192	2.35957	3.45731	2.86491	3.18202	3.20584	2.51674	2.41797	2.97525	1.26684	1.96713	2.714	2.8115	3.13583	2.87632	2.02785	2.8205	3.22578	2.9558	1.55325	2.07974	2.29815	4.64653	3.31871	2.86404
ACADVL	5.84822	6.48237	7.70756	6.47704	6.63834	6.73437	5.67456	6.71964	6.35446	5.93041	6.92113	7.05892	5.992	5.19985	5.65233	6.25642	6.26121	6.3927	5.67503	5.88497	6.08116	7.15592	6.72164	5.92095	6.06944	6.29535	4.81106	5.53053	5.72675	5.27467	6.79676	6.58951
ACAP1	0.0316548	1.14255	2.29417	0.586435	0.776636	1.57514	0.586904	1.64618	2.90441	1.29838	1.22896	1.75929	0.507315	0.00850482	0.927622	0.181847	0.0980973	1.0001	0.923108	1.27929	1.05622	0.162303	0.546563	0.636583	0.987166	1.77449	0.282467	0.386266	0.452866	0.913458	0.979	1.63942
ACAP2	3.99848	3.9247	5.7087	4.57619	5.59191	5.91678	3.77461	4.27982	5.05566	4.32479	4.4425	4.68777	5.69791	3.94592	3.99298	4.72856	3.45583	4.18068	4.56837	4.87953	4.54187	3.88495	4.19142	5.2098	4.30482	4.24509	4.03331	4.36872	4.94944	4.5223	5.2162	4.08941
ACAP3	5.3775	7.64218	5.75903	5.17422	4.80171	6.26382	5.12335	6.08402	6.37071	6.2223	5.10578	5.26019	5.60026	4.97811	4.76797	6.45122	4.51556	4.84704	6.25016	5.06774	5.16099	6.15396	5.50127	5.13256	5.19667	5.09311	4.16814	5.23053	5.28044	5.90924	5.22448	5.06322
ACAT1	6.47866	4.67453	4.80922	5.49343	5.79056	4.77456	4.83736	3.64486	5.40537	4.83497	4.81368	4.83203	4.89841	5.81757	5.31121	4.21401	3.75502	4.23419	5.66671	4.55125	5.6666	4.22037	4.82388	6.92051	5.37346	5.59129	4.38871	6.10139	5.75365	5.45203	5.11772	5.91108
ACAT2	4.62161	4.97098	4.85852	5.13208	5.19135	4.90758	4.8557	3.8832	5.71059	5.77186	4.64658	5.32074	5.16831	6.66076	5.99241	5.12354	4.18709	5.02982	5.22709	5.35028	4.70385	4.61288	4.74898	5.20926	4.57681	5.1464	3.95864	4.68429	4.43474	4.67117	5.9087	4.65471
ACBD3	3.86736	4.27791	4.70075	4.48814	4.09215	5.00547	4.52864	3.8625	4.97309	4.65297	3.53949	4.36417	4.31725	4.5986	4.2263	4.72332	3.89256	4.17953	5.19932	4.13522	4.94642	4.55784	4.44642	4.77382	5.13116	4.69443	3.50891	4.42959	4.92003	4.69464	4.61076	4.67323
ACBD4	0.88749	2.52037	3.65153	3.58426	2.73103	2.96748	1.75766	3.00405	2.8853	3.8508	3.19575	2.72202	3.81042	3.00956	3.07805	2.99887	0.991179	3.00645	3.31689	3.26072	4.15909	2.89822	3.66735	2.55578	4.07352	4.17248	1.9119	2.60778	2.83478	1.74184	4.26802	3.1413
ACBD5	4.5443	3.16415	4.46988	4.10574	3.67573	3.32715	4.41658	4.1524	5.47142	3.89911	3.07863	3.7872	4.09688	4.12324	4.02718	3.81815	3.57107	3.70409	4.64782	4.12404	4.70908	3.82521	4.21303	4.33468	4.775	4.36175	3.65528	4.01098	4.02438	4.10662	4.55828	3.81033
ACBD6	5.16912	5.34676	5.2482	5.32035	5.37208	5.06394	5.55911	5.08577	5.01543	5.42434	4.30601	5.33693	4.96922	5.96185	5.39111	5.69687	4.38018	4.94654	6.36088	5.26622	6.42307	5.5027	5.15813	5.07567	6.3132	6.04332	4.03706	5.81533	5.55503	4.94777	5.81653	5.62406
ACBD7	2.6073	3.69748	4.42029	3.77028	4.03056	2.98954	3.11214	4.10856	5.50526	4.8153	3.36984	3.5683	3.876	2.77902	4.10747	5.66789	2.18141	5.14943	4.88458	4.50325	4.88077	3.85624	3.35471	5.23894	5.09616	3.93021	2.50584	4.4743	4.59452	3.42849	5.41859	3.42179
ACCS	3.98989	0.788062	3.06451	2.92465	2.98685	2.45679	2.01074	2.55407	2.10455	1.47688	3.38386	2.77143	2.1191	2.85946	0.999474	2.03192	1.04472	1.99473	2.70935	1.63722	2.97466	2.16105	2.06126	1.74513	2.92878	2.5366	2.26434	2.99304	3.56298	3.29275	2.2432	2.93638
ACD	4.65725	5.54647	4.8751	4.4911	4.71677	4.18755	3.91739	4.17104	4.75076	4.926	4.09026	4.8252	4.82723	4.37491	4.75677	5.82663	3.9802	5.00806	3.83556	4.0204	3.87103	5.00965	4.74269	4.27802	3.88694	4.08161	2.9824	4.41944	4.77976	4.93318	4.9631	4.56478
ACE	1.87585	4.67074	2.81823	3.87595	3.17451	2.78988	0.360471	1.3322	4.59292	2.71576	1.86589	2.4556	3.262	1.41508	0.824842	1.7205	5.27097	1.76786	2.09366	3.03417	4.03523	1.87154	3.92	2.84698	4.67983	2.73885	2.09842	2.11011	2.73234	0.232259	1.17492	3.83245
ACER2	2.65955	2.50198	3.36511	2.943	2.94669	3.30916	2.03245	3.26084	2.49493	3.44989	3.00653	2.42993	2.4874	4.02423	2.90288	3.94538	1.89314	3.53435	2.50419	2.86865	2.27634	2.95093	4.11931	2.61961	2.60534	1.84157	2.24112	2.10754	2.32026	2.08238	2.69398	1.51406
ACER3	2.74776	2.18251	3.34965	3.69606	3.80193	3.79552	2.42025	2.78549	3.21025	2.42583	3.07047	3.24896	2.06384	3.99254	3.05201	3.0336	2.03667	3.21141	3.45737	3.12046	4.07856	2.7064	3.59753	3.44813	4.00216	3.7449	2.22203	3.6137	3.70988	3.87275	3.87308	2.91209
ACHE	0.23516	0.438958	0.0590428	0.0691125	0.199241	0.17273	1.56714	1.38192	0.346674	2.15251	0.0761402	0.0113945	0.206582	0.172422	1.45343	0.123396	0.129715	0.228219	0.390933	0.114362	0.943351	1.47866	1.24798	1.10317	1.00854	0.32712	0.0859628	0.239572	0.399957	0.128568	0.36816	2.98483
ACIN1	5.1608	6.8512	6.78956	5.13617	6.42591	6.37634	6.00951	6.06742	6.60117	7.20413	6.11652	7.13118	6.90358	6.5093	5.55822	6.50403	5.1229	5.95801	6.28033	6.16754	6.17644	7.09692	6.06198	6.15714	6.19682	6.18156	4.66654	6.04701	6.17141	5.93962	6.05796	5.70588
ACKR1	0.383164	0	0.890522	0.900149	0	1.61033	0.0160991	0.301313	0	0	0.341561	0.0148155	0.128149	5.48498	0.027777	0.696056	0.303969	1.87961	0.0299964	0.904215	0.0709144	3.0744	0	0	0.967579	0.819647	0.340753	0	0.0329642	1.06227	0.787912	0
ACKR2	0.167077	0.181347	0.435688	0.355093	0.386841	0.272505	0.303994	0.388636	0.487611	0.603259	0.337977	0.294487	0.430018	0.283134	0.190031	0.23162	0.158825	0.461016	1.08155	0.216865	1.52288	1.08181	0.414407	1.04443	2.48587	0.32758	0.161047	0.643732	0.789747	0.448656	0.324919	0.947201
ACKR3	0.229342	4.60197	3.22795	1.17515	0.0419239	4.15497	4.68511	3.61528	7.57657	5.16936	3.67044	4.05237	0.98664	0.33605	0.0380742	5.87183	4.10703	1.20167	6.31514	0.467363	7.35478	5.11635	4.00079	6.40088	7.80196	7.46381	1.84625	5.4788	6.71728	3.7264	0.324528	6.14821
ACLY	6.29866	6.90893	7.36264	6.60125	7.48073	6.38216	6.3091	5.90016	6.94797	7.32376	6.0435	6.63163	5.53481	8.75272	6.55223	6.54619	6.75484	6.93907	6.58895	6.58055	5.983	6.3488	6.28151	5.42848	5.80055	5.89178	4.67179	6.0313	6.64172	5.15937	6.98683	6.41161
ACO1	4.19619	3.90754	4.09321	2.80688	3.72758	4.4357	3.62454	3.35006	3.88257	3.85662	3.81194	3.72503	3.32835	3.6961	4.04724	3.42292	1.0564	2.92601	4.16011	3.58134	3.78713	3.03717	4.58906	4.67106	3.76445	3.62895	3.02542	3.888	3.90601	3.9279	4.42072	3.94506
ACO2	5.65792	5.82916	6.07866	5.67692	5.87549	5.60395	5.43879	5.11897	6.31697	5.15226	5.09402	5.7203	5.43277	6.42889	4.75576	5.40916	4.28122	5.63754	4.68239	5.4166	4.97008	4.91901	5.26352	5.66294	4.76768	5.34342	4.20648	4.7053	4.9285	5.28717	5.15496	5.09233
ACOT1	2.36642	1.98963	3.70262	1.39056	1.82991	2.85647	3.12591	2.01979	1.8148	3.02958	3.02276	3.90104	2.68449	2.12501	2.3527	1.85555	1.39522	2.42951	3.19798	2.31123	3.22899	2.61721	2.44698	1.83114	3.35223	3.37126	2.15372	3.22614	3.2744	2.647	2.49481	1.85378
ACOT11	1.96363	1.90602	2.64829	1.81699	2.59026	3.94918	3.06115	3.40842	2.95191	2.3666	2.55992	1.8841	2.19684	1.90127	3.30129	3.14676	1.38607	2.08422	2.11686	2.09434	2.86811	2.26527	3.31205	3.25209	2.45782	3.15189	2.64998	3.23167	3.44431	1.73838	3.1686	3.0505
ACOT13	3.10421	2.87762	3.16122	3.94847	3.51081	3.19712	2.86883	3.12847	3.87979	3.32583	3.17628	2.93159	3.74651	3.18565	3.08597	3.60576	1.81604	2.93416	3.07818	3.58474	2.87754	2.84387	3.06905	3.58015	2.89411	2.84715	3.05591	2.96031	3.00853	3.23978	3.84253	3.41242
ACOT2	4.10843	4.10895	5.57227	4.07925	4.80487	4.80096	4.6665	3.81405	4.40514	5.27281	4.61986	5.63767	5.48324	4.57672	4.01181	4.16814	1.72503	3.2485	4.51492	4.75078	4.63199	5.12527	4.64236	4.59176	4.28544	4.97617	3.70131	4.86187	4.62115	4.14549	4.3263	3.47784
ACOT4	2.02859	1.75147	2.73739	1.41025	1.6599	2.11092	1.34212	2.11482	2.2251	2.98319	2.59624	2.53195	1.41936	2.09278	1.77315	1.73986	0.548401	1.90602	2.94921	1.4263	2.86707	2.7232	2.00814	1.77111	2.88932	3.19341	1.03906	2.7273	2.30135	2.2662	2.06257	1.2769
ACOT7	6.29047	6.34426	7.12806	5.36656	6.41002	6.66955	6.14914	6.46647	6.49523	6.27892	5.87137	7.43888	5.15857	6.56877	5.96587	7.07671	3.96365	5.58448	5.73627	5.46595	5.19969	5.14676	6.22005	5.16519	4.9296	5.36358	4.47812	4.94936	5.10725	6.77678	5.75023	6.17343
ACOT8	5.36759	5.1111	5.19608	4.50788	5.10113	4.61258	3.97128	4.81509	5.35715	4.93365	5.30219	5.28479	4.40307	5.23795	3.90163	5.16857	3.79328	4.86092	4.5602	3.89687	4.35661	4.8193	3.79458	5.38459	4.39788	4.59645	3.35009	4.22296	4.40548	5.18872	4.61202	4.89455
ACOT9	1.59066	2.84339	3.91556	1.09454	0.442574	4.27239	4.29576	3.65205	1.37506	3.13417	3.3296	3.19548	3.08436	4.06963	4.03899	2.98234	1.48452	2.81394	4.18369	0.284601	5.01771	3.94538	3.76383	4.03448	5.15275	4.4617	0.77194	2.71556	2.67618	3.28419	4.35236	6.10996
ACOX1	2.99697	3.34684	5.21567	3.36354	4.35984	4.20809	3.18047	3.26759	4.28104	3.70867	3.38528	4.43556	3.92365	3.72066	2.89074	3.06429	2.60618	3.28406	3.69143	4.06216	3.65793	3.65459	3.60808	3.11333	3.69966	3.64413	3.63571	3.38976	3.61529	4.10349	3.32309	3.49411
ACOX2	0.0180419	0.0199076	0.0624617	0.165108	0	2.34498	0.00926236	0.549338	0.0477041	0.0598472	0.0643725	0.0314153	0.0188975	0.070351	0.40696	0.0376771	0.0370792	0.471529	2.17868	0	2.94992	1.15045	1.42176	2.50122	2.95952	3.10652	0.091322	2.16288	2.67896	0.0300932	0.136919	2.41954
ACOX3	2.0592	2.54673	2.56679	3.16235	2.72617	2.19439	3.08365	2.48842	1.99116	2.2433	2.05955	2.60352	2.95209	1.54705	2.24266	3.23981	1.96159	1.74845	1.9916	2.56945	2.82904	2.49187	1.54071	2.13485	2.78624	2.93281	1.74757	2.22625	2.51719	2.69781	2.79011	2.95809
ACOXL	1.66797	1.31399	2.83847	2.32415	2.67877	2.19387	0.377085	1.0257	1.26613	0.903679	2.61227	4.5387	1.91214	0.644985	1.57916	1.41355	0.240714	2.05738	0.696701	1.72404	1.26564	0.896799	0.829633	1.33435	1.72494	1.21716	0.619779	0.754448	1.08144	0.735939	2.30262	1.47561
ACP1	6.98036	6.51795	6.88661	6.633	7.92727	7.00772	6.15555	6.72587	7.36108	6.24954	6.65398	6.57358	6.92175	7.88479	7.13488	7.71221	5.74612	6.68672	5.9213	7.00265	6.69365	5.88258	6.65958	7.16307	6.62791	6.55378	6.85872	6.18893	6.78399	7.39391	7.47358	6.8478
ACP2	4.89298	3.44314	4.64157	5.20722	5.31896	5.22176	4.43808	4.62236	5.37819	4.24997	4.25773	4.67122	4.50018	4.38998	4.14216	4.82204	2.96899	4.05602	5.51011	3.84806	5.4065	4.16237	5.18345	4.92859	5.10838	5.11092	4.20988	4.96852	5.14981	4.16651	4.95129	4.53832
ACP5	1.24551	0.196351	2.84872	0.691947	2.51677	2.53738	0.225775	2.95813	1.29531	0.842638	3.30816	1.6715	1.63267	0.225995	0.279643	2.95343	0	0.463949	0.0727259	2.73927	2.16127	0.924698	0.486459	2.91957	2.40646	0.349066	1.11697	0.708198	0.401314	1.43067	1.73962	4.57824
ACP6	2.96508	1.52708	4.34816	2.61001	2.6851	1.29581	1.66071	3.21404	2.61538	2.01946	3.08096	3.91258	2.80502	1.48911	1.40415	2.39201	1.16466	1.73997	3.86798	3.14129	4.3141	3.33963	1.03506	3.48608	4.49143	4.15096	1.02625	2.89476	3.05888	3.61481	2.75654	3.73749
ACPP	0.245882	0.611277	0.290463	1.8673	0.193269	1.16307	0.25934	2.01966	1.09761	1.32681	1.195	0.210971	1.16668	0.163125	1.42603	0.00470139	0.105577	2.56087	0.993516	1.5455	1.14642	1.70496	2.19307	2.54289	1.18745	0.391052	2.2012	1.4023	2.50375	4.18537	2.20722	1.41018
ACPT	0.77767	0.989488	0.905869	0.700981	0.991276	0.601961	0.363889	0.436454	0.421515	0.636332	0.609853	0.94169	0.662163	1.10717	0.621127	0.875446	0.234572	1.55047	1.2466	0.660965	0.372154	0.808482	0.31688	0.558477	0.810086	0.502545	0.235886	0.932517	1.07385	0.882255	0.413738	0.448074
ACR	0	0.279157	1.29409	0.457615	1.48577	0.627459	0.139433	1.06748	0.412508	0.170611	0.672734	0.560472	0.298642	0.150786	0.204302	0.762959	0.122582	0.496493	0.169813	0.24817	0	0.173928	1.03295	0.139444	0.236115	0	0.267577	0.477524	1.07897	0.323337	0.397732	1.42488
ACRBP	1.53895	1.41138	2.23386	1.50795	1.1475	1.98997	0.460798	1.60743	2.11888	1.11879	1.28652	1.25471	2.18089	2.15432	0.792713	1.43891	0.60739	2.28549	1.02275	2.12372	0.376395	1.62216	0.924694	1.91512	0.486661	0.305674	0.371249	1.03415	1.2927	1.93613	1.47806	0.827617
ACRC	0.451756	0.592337	1.59343	0.767471	0.494586	1.13506	0.950708	0.214821	0.592552	0.509446	0.639355	1.042	0.846197	0.825684	0.876756	0.310216	0.278016	0.136591	1.14707	0.662139	1.16158	0.566714	2.79978	0.351682	1.23162	0.968526	0.421527	0.935245	1.16978	0.474352	1.01233	1.06032
ACRV1	2.36812	0.53203	1.08428	1.1595	1.06772	1.13164	0.599421	1.05399	2.07098	0.913854	0.903608	1.21759	1.30572	1.83059	0.98408	2.30659	1.25124	1.13062	0.922334	0.964485	1.12367	1.5409	1.21363	2.28428	1.19903	1.02468	1.23874	0.962129	1.48683	1.32209	1.2727	1.2842
ACSBG1	0.231891	0.186673	0.26026	0.433256	0.296913	0.322616	0.184481	0.196715	0.759335	0.398013	0.292573	0.362876	0.404832	0.29114	0.219756	0.221172	0.218941	0.310142	0.363818	0.1485	0.295203	1.89215	0.638982	0.271397	0.543238	0.237789	0.0985187	0.207368	0.267834	1.87977	0.377205	0.288628
ACSF2	0.0382715	2.88467	0.395083	0.49098	0.239052	3.94327	0.90026	3.00062	4.10092	4.02776	0.362782	0.221008	0.211984	1.3087	2.51093	0.75497	0.835785	4.43483	4.32186	1.35595	5.31975	3.55127	4.9345	3.41524	5.24447	5.33448	1.39984	4.61849	4.46626	2.58251	1.54721	3.73257
ACSF3	3.74375	3.80587	3.33348	4.49665	2.88297	4.85751	2.63113	3.38347	3.50166	3.59726	3.22829	2.71186	3.93997	2.47725	4.218	4.37871	2.62113	3.54661	3.64368	3.97156	3.77102	4.07145	5.41284	4.17774	3.72722	3.87067	2.90648	4.07919	4.14285	3.93578	4.02509	4.14273
ACSL1	4.09208	5.02068	3.67329	5.06668	4.28248	4.24312	3.16252	3.5776	4.40172	2.9651	3.66552	3.76877	4.38764	3.73711	4.05018	4.57004	3.6284	2.02306	3.53595	3.46463	4.11106	1.05779	6.03364	3.8855	3.62733	4.42896	3.84898	3.20925	3.66885	4.15034	4.55674	5.46882
ACSL3	3.69198	4.16207	3.96058	5.60518	4.82017	5.41909	4.56381	4.52556	5.28739	3.85387	4.01216	4.22528	3.78893	6.22458	5.14407	4.48102	3.77874	4.57192	4.58551	3.94428	5.8019	3.66469	5.60908	5.12767	5.69123	5.97742	3.06503	4.03883	4.70402	4.86555	4.98641	5.50319
ACSL4	3.89849	4.07206	4.21425	5.23387	4.59981	4.43623	4.09546	3.33981	5.93323	3.55504	3.47599	3.55986	3.85073	4.16801	3.6263	3.40895	3.71236	2.98792	4.93305	3.15918	5.05615	1.97502	3.87105	3.66547	4.90369	4.96642	3.13199	4.25388	3.49717	2.27047	4.59375	4.02695
ACSL5	0.280259	0.106509	0.174251	0.13302	0.0737767	2.82156	0.131737	3.06392	1.91909	0.171536	0.0566441	0.0576654	0.121472	0.145615	0.103054	0.116675	0	0.0631541	5.47178	0.145184	5.93007	0.503348	3.74011	1.88921	5.99382	4.46217	0.287185	1.10845	0.758261	0.365733	0.164983	3.43637
ACSL6	0.536922	5.18767	1.09467	1.8605	2.49473	2.20187	2.14471	1.11341	4.22224	3.12266	1.08724	0.929159	2.18383	2.29333	1.11418	2.46755	3.09104	4.15904	4.72097	0.433913	6.24718	3.4507	0.671595	0.138588	4.89987	5.62261	0.135676	1.67893	1.40056	1.16029	2.47406	0.379939
ACSM1	0	0	0.0410973	0.0824839	0.0143964	1.10959	0.0110386	0.298257	0	0.035305	0.0305192	0	0.0113952	0.0400576	0.343131	0.289166	0	0.195152	0.220317	0.171348	0.356024	0.0654188	1.00333	0.365351	0.813966	0.611202	0.0458978	0.815075	1.00934	0.161562	0.336711	1.13091
ACSM3	0.0561586	0.129038	0.346652	0.0949525	0.0792366	1.29637	0.17615	1.47127	0.490254	1.12973	0.351221	0.126679	1.50453	0.248601	0.13829	0.340474	0.0404224	0.518097	0.514526	0.0595165	1.58455	0.570815	0.268242	3.47673	2.55397	2.00288	0.199427	0.91835	1.38274	0.273334	0.353288	0.582114
ACSM4	0.0885941	0.261581	0	1.4446	1.81353	0.000305283	0	0	0.591511	0	0	0	0.224247	2.82658	0	0	0.345982	0	0	0.0269321	0.00335377	0	0.0283018	0	0.00193321	0	0	0	0	0.840459	0	0.890352
ACSM5	0.0620028	0.0670648	0.000561784	0.083951	0.117666	2.45675	0.0911287	0.0830629	0.0705156	0.067316	0.0352998	0.0776941	0.0699279	8.83184e-05	0	0.375391	0.126294	0.0417318	0.699365	2.86121e-05	2.76209	0.0413363	1.24361	0.162775	2.45085	1.71364	0.000128203	0.747209	0.965512	0.177717	0.223195	0.746871
ACSS1	0.537736	2.33475	3.52657	0.483806	3.99758	5.19928	4.37696	2.85726	3.1773	1.09882	3.18018	1.14066	3.34039	1.95055	3.62865	1.7935	0.390786	2.22798	3.1557	3.08105	4.51047	2.7869	3.65427	5.82283	4.05172	3.80771	2.52121	3.13255	3.6742	7.01063	4.13388	4.4228
ACSS2	1.84621	3.62933	3.11652	2.68485	2.90423	3.30938	2.59299	3.01272	3.68116	3.82551	2.28265	2.47863	2.70677	3.68797	2.94763	2.40887	0.761845	4.1369	3.6087	2.87218	3.94885	3.82165	2.65972	4.49677	3.77099	3.96665	2.35699	3.44712	3.49901	5.71602	3.00566	3.68185
ACSS3	2.07292	0.0860294	5.10718	0.28567	1.67399	0.101361	0.0590193	1.77486	0.952322	3.00098	4.79589	3.48112	2.26443	1.14295	1.44354	3.03291	0.140498	0.073362	0.660075	1.1566	3.48909	0.125877	0.9515	3.3625	4.17349	3.07921	0.327903	2.91147	2.06135	4.29662	3.29818	0.711853
ACTA1	1.98794	0.805078	0.491267	0.208304	1.06278	0.240683	0.358946	0.367206	0.160145	0.671363	0.33471	0.338109	0.222303	3.76785	0.336872	0.531902	0.138009	0.312393	0.505766	0.680432	0.459089	0.549425	0.467383	1.61495	0.568321	0.314446	0.351963	0.298594	0.368159	0.163594	0.198316	0.152952
ACTA2	0.0993796	0.107161	0.548289	1.06028	0.172016	0.316974	3.45124	0.326024	0.33488	1.85227	0.078444	0	0.2161	0.116114	0.0689865	0.0701232	0.0685962	2.86121	1.91551	0.0412441	2.09323	0.0221982	0.111609	4.0099	2.06329	1.60988	0.0441514	2.86033	2.64361	0.154764	0.118034	0.110703
ACTB	10.2874	10.814	10.2448	10.5506	10.655	10.4312	10.3033	10.4269	10.474	10.7525	10.0205	10.2347	10.0118	10.514	11.0466	10.8801	9.32176	10.8256	11.1537	10.0493	10.9466	10.1461	10.5102	11.4915	10.807	10.4846	9.63549	10.5822	10.4644	9.91251	10.9903	10.1593
ACTC1	0.23747	0.242861	0.0148778	0.0257868	0.0150343	1.25956e-07	0.0199854	0.115747	0.628021	0.0603776	6.0661e-07	1.77687e-07	2.20861e-07	6.79624	0.0176688	0.054092	2.22078	1.39818	0.0301308	0	0.0494423	0.137095	0.0080145	0	0.107183	1.87138e-07	0	0.0305018	0.0806005	0.0289613	0.0401047	0.00750454
ACTG1	11.3707	10.7059	11.8408	11.1986	11.4588	11.7031	10.3569	10.6873	10.5063	11.4997	10.6341	11.3976	11.2554	11.8519	11.907	10.507	9.22588	11.3244	11.4519	10.9355	11.3801	10.2149	11.4231	10.7657	11.3071	11.6071	10.9675	11.6942	12.049	10.7513	11.3466	11.4783
ACTG2	0.0277347	0.137964	0.409573	1.12068	0.91698	0.019457	1.49468	0.146081	0	0.0917099	0.41304	0.485282	0.424839	0.00153482	0.437222	0	0	0.0349464	0	0.0665998	0.038033	0	0.0340841	0.0696382	0.000833544	8.62745e-06	0.19324	0.101988	0.102775	0.231097	0.43403	0
ACTL10	2.01048	0.325682	3.25867	1.4894	1.17843	4.68073	1.34167	1.47436	2.10604	2.54485	2.34716	2.03744	1.57861	0.780734	1.17785	1.90966	0.37308	0.960125	3.25884	2.53825	2.08181	1.07034	3.51683	2.25111	1.94366	2.01113	2.46985	2.2884	2.37154	1.96777	0.904524	4.66941
ACTL6A	6.45837	6.42436	7.5316	6.77441	7.37595	7.52169	5.99492	6.77372	7.08129	7.31962	6.39349	7.32172	6.9389	6.78584	7.4796	7.96165	5.57461	6.81514	6.87297	6.74264	6.26522	6.52901	7.23493	7.177	6.39393	6.44871	6.68045	7.30655	7.20998	7.24108	7.78289	6.73082
ACTL6B	3.62987	5.55789	4.10111	5.0741	5.24862	4.51222	2.80474	2.95298	6.33112	4.88971	3.51763	4.30504	4.77969	4.38081	4.75391	5.98836	4.23344	5.07065	5.42208	4.98028	5.35961	5.79649	3.17307	4.90515	5.33252	4.98263	3.95538	3.83897	3.82775	1.15169	4.76665	4.89628
ACTN1	4.57771	5.43617	5.93775	4.13788	4.33913	5.31292	5.32391	5.15042	6.64346	6.15462	5.11009	5.92624	6.26088	4.9458	3.41582	5.00449	3.83753	5.19796	5.44273	4.2864	4.61696	5.34784	4.31658	5.73813	4.69775	4.63664	4.40277	5.72474	5.64636	5.5337	4.13134	4.366
ACTN2	2.52967	0.0954551	0.2273	0.064256	0.0333045	0.654534	1.65221	0	0.075471	0.262497	1.2812	0.405062	0.272534	0.407888	0	0	0	1.35996e-05	0.0126031	0	0.0240083	0.062486	0.00612176	0	0.146276	0.0388564	0.00671571	0.145268	0.144397	0.0115415	0	0.0893024
ACTN3	0.619241	0.747802	0.249374	0.0385724	0.132492	0.151845	0.0317073	0.242753	0.299075	0.208905	0.503103	0.426527	0.0348166	0.583077	0.0997887	0.357671	2.05082	0.427248	0.120442	0.0744433	0.115212	0.213788	0.0931489	5.07787	0.207596	0.112685	0.0336211	0.431396	1.02074	0.126692	0.0499379	0.509507
ACTN4	6.7127	7.41187	6.58235	6.65468	6.36665	7.68473	6.71201	6.4598	7.21986	8.01986	6.8603	6.31674	6.29558	6.16633	7.15956	6.34668	4.85956	7.51311	7.05426	6.26606	6.57822	6.76048	6.65161	7.35002	6.63856	6.40318	6.38063	6.79313	7.03788	7.29339	7.20124	9.00316
ACTR10	5.42718	6.07045	6.71816	5.2597	5.69341	5.7709	4.77375	5.40433	6.18243	6.20101	6.19296	6.77853	6.33349	5.97081	5.19031	6.21686	4.35214	5.58011	5.437	5.31393	5.54135	5.98156	5.11238	5.85522	5.38911	5.80059	4.71611	5.51053	5.66385	5.38667	5.94183	5.018
ACTR1A	5.3128	6.08252	5.97412	5.85647	6.12904	5.95309	4.75981	5.88177	5.5092	6.75669	4.6447	5.81132	5.79607	5.53447	6.19792	6.92963	4.29058	5.77433	6.06415	6.53012	6.07275	5.71969	5.20538	5.11658	5.87288	5.78838	4.76054	5.23096	5.30449	5.99942	6.16793	5.9936
ACTR1B	5.00135	5.71567	5.87108	5.3809	5.16956	6.24279	4.7701	5.7354	6.36022	5.74942	4.9486	5.27846	6.03245	5.92532	5.72948	6.16738	4.85333	5.55904	5.25362	6.31983	6.2011	5.39863	5.94159	6.4123	6.35183	5.88952	4.06446	5.15023	5.55964	5.86764	6.39365	4.98985
ACTR2	5.94738	6.18776	6.72505	6.24989	6.75684	6.94867	6.88191	6.53362	6.73977	6.16776	5.70772	5.81501	5.95164	6.735	6.62669	6.59995	4.91822	6.25573	6.08345	6.34275	6.87747	5.45566	6.51248	7.11541	6.73313	6.23643	6.22907	6.11058	6.74719	6.75192	7.07165	6.62232
ACTR3	5.86922	6.09492	6.56445	6.33905	6.62315	6.92212	6.4964	6.50251	6.74018	5.70526	5.98446	6.4817	6.27678	6.65706	7.03697	6.66948	5.20216	5.99116	5.85241	6.43737	6.43872	5.18751	6.01613	6.48749	6.25023	6.04858	6.35804	5.56213	6.22409	6.63352	7.27067	6.32843
ACTR3B	3.47681	3.96994	2.8695	3.68566	3.67086	4.03891	5.12854	3.44557	4.20277	2.91874	2.61481	2.25252	4.37182	4.24038	2.90297	3.83591	2.67163	3.4125	3.44094	3.1023	3.53775	3.375	4.02588	3.93484	3.68781	3.25623	2.28247	3.36714	3.53068	4.75923	3.44306	3.54098
ACTR3C	2.2506	0.936192	0.51508	2.95846	1.31865	2.31111	1.46788	1.76105	1.43004	1.1312	1.39111	0.71929	1.37695	0.669589	1.66574	1.86927	0.306569	1.72518	2.2458	1.39348	2.4628	1.16906	2.87875	3.3822	2.73896	2.12381	1.79925	2.23247	1.9305	2.70996	2.35785	3.55156
ACTR5	3.29032	4.80366	4.22981	1.91865	3.63563	3.21918	3.22328	3.71292	5.08965	3.32942	3.59807	4.78065	2.79879	4.42649	2.1446	3.48456	4.12688	2.3648	2.94189	3.30644	2.72542	3.76346	2.74709	3.32671	2.90988	2.77281	1.41428	3.08258	3.16148	3.78689	2.3289	2.98737
ACTR6	5.66633	4.69431	5.49134	4.88179	5.64554	5.08176	5.65554	4.52185	5.34396	5.12578	4.85341	5.38493	4.70728	5.50737	5.02189	5.60912	3.90341	5.28122	5.12008	4.62625	4.89952	4.4762	4.84608	5.00287	4.60348	4.52206	3.88268	4.62161	4.98223	6.02961	5.64216	5.09813
ACTR8	3.43601	3.93106	3.75784	3.94445	3.89278	3.11356	3.1936	2.98167	3.51257	4.12191	2.91168	3.33599	2.86405	3.23312	3.56832	3.61079	2.62599	2.78661	4.59431	2.88589	4.55283	3.95063	3.05543	3.31343	4.41852	4.59911	2.40103	3.89673	4.09516	2.61341	3.84689	3.33261
ACTRT3	1.63379	0.707684	0.955985	1.09036	1.16763	1.07492	0.627793	0.6813	0.527932	0.779632	0.773173	1.05905	0.605501	0.43601	0.73001	0.969469	0.438864	0.100323	2.04844	0.869713	0.355544	0.175273	0.0611453	1.216	0.592779	0.278171	1.17644	0.292898	0.380457	0.488568	1.28411	0.680595
ACVR1	4.48553	2.59636	3.68868	5.11178	3.71509	5.17379	3.97103	3.09793	2.92309	2.31842	5.29281	3.44771	3.47963	2.78732	4.1037	3.16736	0.730786	3.45127	2.99038	3.92232	4.05433	1.8165	4.66567	4.13182	3.83914	4.09385	3.51381	3.46897	3.73421	5.11319	4.7449	4.37134
ACVR1B	3.86204	4.43874	4.47507	4.84331	5.34434	4.20722	3.78961	4.55283	4.76899	5.06301	3.8835	5.09087	4.18373	5.62372	4.43827	4.39834	3.1542	5.23088	4.57344	4.32829	4.41626	4.72416	4.81879	4.51144	4.34128	3.79351	3.72495	4.26722	4.40322	5.11809	4.89311	4.75446
ACVR1C	3.33233	0.459966	1.74254	1.51571	1.84602	1.30264	2.21215	1.56413	0.538843	1.21155	2.87328	1.58872	0.199928	0.388652	1.40033	1.92307	0	1.23788	0.521786	0.305038	1.75111	0.206868	0.916047	2.7683	1.27371	1.39542	1.38524	1.63054	2.31248	1.82664	1.10307	1.72491
ACVR2A	3.0588	3.67732	4.73968	3.29874	2.50498	4.12568	3.58324	4.04304	4.51814	3.54052	4.11836	4.37443	4.18683	4.91088	3.96122	4.74699	1.44712	4.27394	3.86723	3.31413	4.14309	3.31404	3.94528	3.76335	3.88851	4.45649	3.24496	4.3353	5.03528	2.74478	4.33515	3.70134
ACVR2B	2.53711	3.44314	3.19905	2.4447	2.66851	2.59881	2.74717	2.13154	2.86173	3.03551	2.74035	3.40309	2.50805	4.69598	2.35745	3.09366	2.68678	2.68743	3.5401	2.74947	3.27909	3.63782	2.67459	3.08099	3.48672	2.84756	1.60704	3.03752	2.96188	2.5039	3.35675	2.68153
ACY1	5.86612	2.09944	2.42267	3.41718	2.91609	3.92717	3.9971	3.39743	2.62602	1.66388	2.50742	1.73976	2.13772	1.17126	2.62226	2.42951	1.09511	2.03068	3.43938	1.44434	3.88141	2.72821	2.69645	3.51966	4.1112	4.04969	2.43282	3.609	3.52464	2.12757	2.93093	3.11402
ACY3	0	0.0373061	0.0204156	0.152935	0.0255213	0.0548623	0.108578	1.56458	0	0.0448944	0.0505169	0	0.0667028	0.0222176	0.0383214	0	0	0	0.340496	0.0499548	0.690421	0	0.178411	0.0264272	0.178962	0.249205	0	0	0	0	0.16043	1.8478
ACYP2	3.87059	4.98632	4.7455	4.63145	4.65281	4.49575	3.71274	4.1105	5.22226	3.77453	4.457	3.57164	4.714	3.95774	3.91181	5.00963	3.45718	4.05345	3.61378	3.99589	4.24986	4.1386	4.17499	4.28162	4.12738	4.0035	4.34538	3.63577	4.37294	4.56244	4.22712	5.11426
AD000671.6	1.7455	3.16293	2.69756	2.22493	2.15072	2.91821	1.86734	1.57817	2.61233	2.73673	2.39145	3.22243	2.44876	1.94915	2.41036	2.45132	1.23343	2.52391	2.6214	2.33194	2.57765	2.59138	2.38667	2.14063	2.66118	2.75341	2.20722	2.03849	2.17259	2.46059	2.3193	3.97127
ADA	0.23305	1.12854	1.69204	0.434986	2.25072	0.896296	3.23587	2.21233	2.33709	0.0887433	1.00269	2.88619	4.18681	2.48513	0.24207	1.6909	0.243537	1.28047	0.163169	3.71229	0.0326315	0.356525	0.388618	1.06509	0.146032	0.113867	1.17333	0.529889	0.394501	2.88113	0.175956	3.96592
ADAD1	0	1.76065	0.0381281	0	0	0	0	0	5.17386	0.0162964	0.0161089	0	0	0	0	0	3.70176	0.019467	0	0	0	0.0626549	0	0.112631	0	0	0	0	0	0	0	0
ADAD2	0.0698812	1.02775	0.0564069	0.161524	0.03606	0.0151184	0	0.136315	0.123472	0.16946	0.173123	0.0694658	0.141998	0.215637	0	0.137633	0	2.09052	0	0	0	0.123563	0.0285538	0.0697326	0	0	0	0.137875	0.220592	0.0543232	0	1.01469
ADAL	2.92317	3.73916	2.89187	2.79437	3.038	2.51417	2.94642	3.11098	3.58112	3.44896	2.39442	2.8865	2.67953	4.48274	2.32578	4.54709	1.76522	3.69166	3.84369	3.7519	3.35357	2.89137	2.89139	2.66057	3.41297	3.53799	2.18292	3.10143	2.93725	3.77584	2.78886	2.32284
ADAM10	3.85739	4.42089	4.93093	4.21799	4.45226	4.52069	3.16936	4.36505	3.84893	4.0499	3.98486	5.31035	5.16987	4.50576	3.67355	5.38318	2.64671	4.30605	5.41642	4.69071	5.28477	4.20392	4.70367	4.33113	5.31212	4.69178	3.63382	5.14572	5.28868	4.99526	4.12243	5.24177
ADAM11	0.471318	5.29397	2.0841	0.87826	1.13174	0.929168	2.89651	0.636298	6.74625	2.68952	0.264865	1.5023	0.777428	7.91458	1.03143	1.23848	5.12326	2.66355	1.68767	0.470493	1.72538	3.15708	1.3933	0.976099	1.71983	1.14947	0.170025	2.59439	1.89731	0.427526	1.05363	0.864557
ADAM12	0.247726	2.13595	0.452609	2.28675	0.019391	0.355012	1.63029	0.220058	3.44632	1.08675	0.502287	0.165592	1.80143	0.790062	0.205606	0.711296	0.978841	0.426815	2.74235	0.203102	3.15453	0.534139	0.413976	0.0847004	2.7304	2.51325	0.0199672	0.429472	0.232061	0.454899	2.56111	0.590036
ADAM15	5.05706	4.28228	5.00336	5.46574	4.21905	5.41322	4.95834	6.17685	4.58949	4.7692	4.12251	4.44244	3.63756	3.22212	6.10833	6.33843	4.03194	4.74351	6.29354	4.00665	6.61719	4.55143	6.81661	5.48033	6.78134	5.79883	4.22555	4.83188	4.66197	6.47271	6.21155	7.28882
ADAM17	3.67432	3.47149	4.23965	3.77534	4.60917	5.08784	4.64406	3.98727	4.13534	3.32733	3.90466	3.99372	3.76221	4.63626	4.26739	4.60277	2.87642	3.53231	3.82531	4.2798	4.32752	3.49545	4.25201	4.20667	4.32367	3.90491	3.69745	3.82319	4.50068	4.88313	5.22141	4.45389
ADAM19	0.946608	2.7325	2.9343	0.237298	2.6296	4.22596	2.40768	1.49781	3.96208	1.44027	3.0048	2.63897	0.207915	2.76776	0.0649706	2.1682	2.43779	4.18903	3.64345	0.524164	4.53237	2.88653	1.90362	4.08071	4.22516	4.73486	1.30202	3.64434	4.86309	2.84803	2.06619	0.393971
ADAM22	3.86305	3.48838	3.16105	3.27141	3.99512	3.04652	3.58005	2.05848	1.2148	3.19609	2.99387	2.66826	3.48606	3.85288	3.33696	3.95371	1.56545	4.86776	3.75354	2.72452	3.87249	3.27976	3.7673	4.84519	3.44748	3.85626	0.920573	4.20031	4.44047	1.87933	4.10818	2.10111
ADAM23	0.0616159	3.38841	2.81163	0.786568	3.45935	0.618046	3.93274	1.76706	1.3771	3.93281	3.91288	3.58036	2.93209	3.56301	4.13625	2.31442	1.74488	3.66311	1.86413	3.86713	4.0612	3.53331	1.39034	5.65839	2.83019	3.34929	0.0885941	2.64055	4.05426	0.0383979	4.49929	0.769647
ADAM28	0.405653	0.40086	0.167018	2.73068	3.79688	2.10919	0.580035	2.84582	0.278896	0.127801	1.85075	0.266465	3.64269	1.22543	2.6111	0.799242	0.170726	0.123388	0.598446	2.26988	0.688105	0.250785	0.976064	3.33922	0.617166	0.512625	3.00125	2.49509	4.06525	0.200435	4.61739	0.370955
ADAM33	0.170501	0.17967	0.426897	0.0724674	0.126172	3.08274	0.0921928	0.959922	0.356128	0.0713478	1.26134	0.119723	0.113785	0.806299	0.0614396	0.972433	0.0280862	0.0565513	0.191926	0.0650726	0.141925	0.119678	2.42634	0.445668	0.393241	0.122356	0.310828	1.04099	1.46528	0.105017	0.078779	4.99134
ADAM8	0.506332	0.572709	1.28476	0.568922	0.438495	2.32717	0.172891	3.44835	0.880657	1.03003	0.909948	0.614621	0.637212	0.864026	1.08822	1.89914	0.0930498	1.12454	1.67276	0.544065	0.961685	0.828105	1.88873	0.868697	1.25985	0.824604	0.726448	0.546882	0.789254	2.53433	0.653526	1.86834
ADAM9	4.01264	4.53557	4.57401	5.46061	5.64317	4.92583	4.85754	5.27737	4.84172	4.35303	4.19731	4.43156	3.33929	4.50282	5.50153	3.93463	3.17553	3.40425	4.56198	3.95745	4.10409	3.47624	4.65732	4.65013	3.83263	4.02806	3.33147	3.88007	5.03907	5.50017	6.44575	4.2462
ADAMTS1	0.0398231	1.31574	0.167022	0.14562	1.10148	0	2.5392	0.0866738	0.381791	0.579948	0.106699	0.08706	0	1.55475	0	0	0.665801	1.60228	0	0.0114809	0	0.544543	0.0991151	0.0185678	0.0117893	0	0	0.184121	0.134491	0.662835	0	0.0401765
ADAMTS10	0	0.0512451	0.124713	0	0.00703157	0.126143	2.71058	0.0748517	0.140552	0.305664	0.038865	0.0125522	0.0353447	2.97298	0.0118862	0	0.0244205	0.00013569	0	2.30406	0	0.377204	0.000262959	0	0	0	0.043978	0	0	0.589105	0	0.064132
ADAMTS12	1.49663	0.105785	0.171164	0.0865342	0.0339613	0.00375149	0	0.0270957	0.036686	0.597406	0.104196	0.0548432	0.0886091	1.10534	0	0.0104655	0.0608679	1.63519	0.15751	0.0568438	0.063913	0.00561292	1.49456	0	0.390383	0.0762702	0.0494934	0.733532	1.2612	0.00587065	0.00999889	0.337617
ADAMTS13	0.746325	3.14043	3.63172	2.28999	3.08606	1.7213	2.95192	3.60889	3.67024	0.894852	1.67562	2.47173	1.54296	2.84961	0.911955	3.63651	1.81104	1.02096	2.44949	2.68322	2.18682	2.36611	2.80555	2.14318	2.72103	2.03018	1.89235	1.03348	1.96033	0.577519	1.13106	2.53856
ADAMTS14	3.06351	4.61232	4.4892	4.43711	1.57829	3.39385	2.31347	1.27974	4.09413	1.34927	3.4553	4.66533	5.04742	4.30241	1.25688	2.10713	2.28539	2.97449	4.17672	2.14111	5.20741	2.64346	3.13866	4.66582	4.9644	4.9118	0.361707	3.19069	3.53243	0.384899	3.16771	2.2269
ADAMTS15	0.00740701	1.76147	0.08628	0.0224311	0.526989	0.51053	0.46559	1.54302	4.91315	1.2669	0.061892	0.00875333	0.0501368	4.05722	0.529582	3.67207	1.08834	1.3665	1.62655	0.058106	1.94865	1.18957	0.573844	4.43418	1.74428	1.90475	0.232115	1.80335	2.48611	1.47016	1.30632	0.414494
ADAMTS16	0.218721	0.691597	1.03328	0.611192	0.187784	0.348497	0.118011	1.05635	2.88389	0.396367	0.698428	0.58487	0.470393	0.382953	0.204311	2.37092	0.150373	1.41862	0.0756476	0.328638	0.289138	0.251635	0.332005	1.59668	0.511265	0.956717	0.0816928	0.263359	0.22433	0.348084	0.382236	0.468996
ADAMTS17	0.0152217	1.72932	1.68775	0.908513	0.0371647	1.60671	0.856511	1.08206	1.75123	0.0220748	2.44736	1.97886	0.454828	1.02444	0.027544	2.30896	0.14559	1.47691	0.0241125	0.608463	0.0598509	0.583697	0.00802527	0.0281644	0.0601331	0.0310327	0.467143	0.0106147	0.0104119	2.14079	0.046402	0.0269592
ADAMTS18	0.0339282	0.630529	1.09058	1.60449	0.453651	1.37763	2.27376	1.48761	2.57186	1.39501	0.565888	0.0783382	1.68682	0.138476	2.93628	3.58577	0.276157	1.92139	3.0969	0.747838	2.99805	1.1789	5.85832	3.10104	2.9027	2.83534	1.1702	4.12215	4.75293	1.09923	4.12787	2.83798
ADAMTS19	0	0.0117522	0	0.00747948	1.16205	0.053611	0.356189	0.0461788	1.09534	0	0	0	0	0.264866	0.00615758	0	0.176537	0	0	0	0.135425	0	0.0198073	0	0.013902	0.169458	0	0	0	0.245044	0	0.0131966
ADAMTS2	0.16734	4.40778	0.260691	0.218019	0.160619	1.1515	4.19913	0.820676	2.17099	5.28578	0.287105	0.290088	0.327143	2.46395	3.14517	1.15264	0.714353	4.23646	0.958744	0.1966	5.95714	5.01301	4.40273	3.74764	6.56274	5.94724	0.0820661	0.278799	0.463547	0.378026	4.88987	0.117623
ADAMTS20	1.47925	0.0204618	0.02002	0.462936	0.836283	0.0211633	0.00500059	0.0223076	0.01211	0	0.942281	0.0171181	0	0.0114355	0.00473117	0	0	0	0	0	0	0	0.0240536	0.00577571	0	0	0.0202933	0	0	0.0115417	0.00589034	0.539402
ADAMTS4	0.281339	1.10727	0.536837	0.350138	0.313304	0.376266	2.64373	0.27847	0.941036	1.0552	0.344563	0.875194	0.45929	0.99637	0.178066	0.396908	0.170102	0.491474	0.420998	0.491589	0.478272	1.73386	0.351647	0.769082	0.545133	0.400035	0.531336	0.692243	0.558868	0.54337	0.420547	0.27783
ADAMTS5	0.667972	2.13917	0.126611	0.828569	0.0430856	0.00450024	2.38484	0.0174838	3.5636	1.84444	0.0661407	0.607672	0	4.25309	0.0173012	0	1.96919	5.14697	0.086043	0	0.00807456	2.44094	0.0186549	0.00527316	0.0175758	0.0160642	0.00702951	0.0179896	0.0510358	0.0182568	0.00647089	0.0337416
ADAMTS6	1.90439	0.562141	0.537013	0.384273	1.73458	0.0574621	0.026536	0.536057	0.567913	0.954113	0.508179	0.375945	0.612265	0.437435	0.288154	0.324611	0.366636	1.23378	1.03649	0.343302	2.67981	0.960664	0.25769	0.163314	2.54933	1.313	0.349003	1.05859	1.39259	0.846551	0.918069	0.366591
ADAMTS7	0.0720258	4.14234	1.06884	0.129403	0.0726088	3.41405	1.20191	1.3351	0.170765	2.54466	0.636449	0.423473	0.0134415	1.42848	1.00393	2.15546	0.340926	3.97682	2.88265	1.19593	1.76555	3.67255	0.500617	1.26941	2.14802	1.12594	0.0214623	0.679911	0.443297	0.0706199	0.780923	0.832078
ADAMTS8	0.0235691	1.43709	0.0948985	0.0522787	0.290047	0.108117	3.7511	0.150762	2.11969	0.262296	0.875599	0.0284169	0.0453532	2.48971	0.0224078	0.57544	1.06913	0.117379	0.117349	0.0960573	0.172495	0.499447	0.294906	0.245835	0.265231	0.0369831	0.0205032	0.198028	0.157295	0.61017	0.0473056	0.0848471
ADAMTS9	0	2.93513	0.107446	0.0547677	0.0600635	0.188496	1.21095	0.259529	1.65264	0.114422	0.00462764	0	0.129287	0.176863	0.0142853	0	0.165389	0.010976	0	0.116627	0	1.15258	0.0383266	0	0.0668805	0.0855121	0.0351128	0.20348	0.175544	0.149714	0.00535899	0.35243
ADAMTSL1	3.83291	0.669508	4.86782	0.89735	2.901	0.330489	0.251181	1.78306	1.2972	0.737617	5.25928	3.6543	3.12634	0.38847	1.43004	3.77754	1.75874	1.64673	0.189372	2.31879	0.175733	0.814476	0.184752	0.328256	0.221217	0.142146	1.08959	0.517703	0.706169	0.012704	2.11076	0.135116
ADAMTSL2	1.55365	3.00574	3.48469	4.71447	3.57515	5.27184	2.53192	2.47185	1.75562	3.17371	3.09456	3.09373	3.62753	1.38493	1.61404	3.82996	0.559138	2.10189	2.70634	3.60579	4.0585	2.22709	4.79011	4.01721	3.78984	3.60766	4.2547	2.59239	2.84326	0.101743	1.30775	2.27517
ADAMTSL4	3.07061	0.476183	1.4323	0.626226	3.09959	1.59915	0.643048	1.18988	0.594097	0.32273	1.76815	0.868609	3.32841	0.76611	0.861706	1.5614	0.248737	0.662968	1.26288	1.61308	1.2965	0.57758	0.490849	0.462458	1.26459	0.757916	2.7566	0.847133	1.19447	0.369249	2.65469	0.402158
ADAMTSL5	0.710839	0.381979	0.432935	0.285968	0.319109	0.496586	0.42916	1.14093	0.510422	0.332624	0.364853	0.489383	0.352355	0.551199	0.184399	0.386698	0.109818	0.314227	0.440476	0.264316	0.180984	0.437837	0.326752	0.260114	0.319697	0.347703	0.145599	0.252351	0.233881	0.346066	0.403454	1.0428
ADAP1	3.22441	3.27432	2.07963	0.529325	0.203232	3.15212	3.87269	3.19722	0.825022	0.280341	2.32387	2.56998	2.2273	2.10656	3.06571	0.831776	0.45618	0.263906	0.668498	0.583925	0.379559	0.545674	1.45268	1.83688	0.350272	0.197908	1.97211	0.639093	1.75872	1.60456	0.354606	3.62893
ADAR	5.40697	5.52537	6.30325	5.79296	5.97963	6.54823	6.92309	5.7404	6.09375	6.33435	5.01457	6.31846	5.51232	5.88197	5.96398	6.09681	4.74664	5.83774	8.28248	6.00676	8.33174	7.01238	6.1454	6.39142	8.17676	7.54162	4.89405	6.74668	6.7827	6.99958	7.26865	6.67092
ADARB1	2.10829	3.08344	4.06962	1.7425	1.88057	2.42652	2.99711	2.66702	5.12814	2.00502	3.4079	3.92682	1.07834	5.33854	2.57657	5.0507	2.11843	6.19231	3.18058	0.918903	1.77508	1.89499	0.892301	6.01197	0.88736	2.28807	0.204995	1.73109	1.93883	3.47127	4.0947	2.40594
ADARB2	0.0230682	0.428959	2.49937	3.28232	1.04418	0.869347	0.297864	1.31962	0.988499	3.58798	1.68176	1.0152	3.45644	1.24421	1.17031	3.09937	0.505704	3.00759	3.41396	2.42036	4.16221	0.29274	2.35039	3.29776	4.6246	4.69456	1.84968	2.08583	2.56921	0.108233	3.24228	0.0610386
ADAT1	4.02178	3.3887	3.70574	4.05237	3.28849	3.50082	3.12379	3.53629	3.51324	3.58099	2.95529	3.3254	3.47708	3.43109	3.0805	4.49851	3.10836	3.6459	4.2271	3.4751	3.85213	3.73406	4.14269	2.93331	3.67187	3.80921	2.56425	4.07169	4.45355	3.96452	4.19391	3.72494
ADAT2	4.12393	2.51325	2.9029	2.45322	2.63186	2.43931	3.49386	2.3144	3.5439	2.30403	2.71062	3.76382	2.72195	3.20104	1.68757	1.48802	2.07147	1.39788	2.21463	1.44861	2.27009	2.13995	1.39873	2.14994	2.08096	2.50554	1.60027	1.88007	1.80009	3.22648	2.82867	1.79486
ADAT3	2.66938	3.7198	3.78991	2.81856	3.11397	2.73104	3.19125	2.69925	3.20842	4.02627	3.65099	4.10045	2.94743	2.16058	2.9295	3.9472	1.85859	2.9558	2.90773	3.15897	2.87406	3.3441	2.01627	3.23087	2.97353	2.73823	3.13283	2.78576	3.28276	3.13484	3.31392	2.65961
ADCK1	3.19885	3.68226	3.52964	2.57501	3.35545	2.86921	2.19966	2.18798	2.96503	3.3495	3.30853	3.90379	3.64762	1.76198	1.38192	1.65207	1.46709	1.94822	3.12215	3.00026	3.09614	4.11098	2.5813	2.6191	2.72654	3.09135	1.51349	3.35882	3.52012	2.10004	2.05565	2.28535
ADCK2	4.10358	5.06699	3.83289	4.79355	4.74761	4.0842	4.29476	4.29774	4.89914	4.05139	4.01341	3.91819	4.44884	4.69013	5.08695	4.62537	3.62166	3.44517	5.02343	4.65016	4.63544	4.14734	3.82078	4.83753	4.48137	4.35371	4.21725	4.51534	4.60074	4.57721	4.42389	4.37758
ADCK3	6.35288	5.74755	4.99561	4.27388	4.74849	4.19558	4.6701	5.1154	7.00744	4.85196	4.70482	4.8038	4.67405	6.26058	4.79686	5.35013	5.43457	4.50325	5.44211	4.17509	5.40444	4.98641	4.58896	5.52526	5.62952	4.97535	4.3056	5.01198	5.12531	3.80798	5.54591	4.28975
ADCK4	3.58289	4.49411	4.84423	4.28239	4.74674	5.03806	3.48314	4.40117	4.47787	4.79936	3.75844	4.67017	3.82699	3.89628	4.66458	4.49064	2.99551	4.54847	4.22769	4.37179	4.52232	4.24473	4.08998	4.41997	4.70885	4.427	3.26868	4.33286	4.42719	4.40224	4.59133	7.59519
ADCK5	3.13625	3.51469	4.81827	3.36404	2.22849	4.14762	3.23658	3.56173	4.93955	3.26341	4.69887	4.89191	4.14829	3.28928	2.93211	3.00697	2.03716	2.81291	4.1876	3.39146	4.24469	4.38661	4.50574	3.83926	3.90057	4.16291	2.2317	2.76006	3.52119	4.71114	2.93339	4.71892
ADCY1	4.94304	4.64809	5.2416	5.65467	4.78156	4.85865	2.83001	3.62253	4.06734	3.6109	4.73976	4.87151	5.84882	2.6709	3.27977	4.90254	2.91543	2.98587	4.88234	6.65395	4.9548	3.34849	5.13029	4.73694	4.23789	4.72885	5.11221	4.09328	4.59295	0.409292	4.46167	3.81269
ADCY10	0.0680244	0.234116	0.285654	0.0733811	0.194736	1.28886	0.250579	0.0795061	0.1383	0.186969	0.08729	0.0956188	0.126938	0.207838	0.316859	0.464595	0.251027	0.174815	0.105507	0.0314045	0.161744	0.184972	0.182081	0.0800659	0.249168	0.0444542	0.232316	0.490971	0.334733	0.296519	0.142845	0.128569
ADCY2	4.05853	3.21191	3.38163	2.18248	0.596702	3.75457	0.189857	1.26004	0.653807	3.80528	2.18605	2.90938	2.8741	0.309428	3.34119	3.26283	0.425755	4.3282	4.94009	2.97065	5.93216	3.68348	2.02406	5.0637	5.95261	6.04074	0.812736	2.4548	3.15444	0.100887	2.71663	3.08779
ADCY3	3.69767	4.53241	4.39968	3.281	4.96044	4.74525	4.13173	3.57377	5.25648	3.47464	4.67341	3.45283	4.02688	4.04728	4.10776	4.42041	3.20441	4.08894	4.03863	3.70957	5.13213	4.16945	4.35835	5.07547	4.65442	4.49414	3.65702	4.05498	4.48894	4.61587	4.9824	3.54994
ADCY4	1.61354	0.23441	0.821998	0.502384	0.0882206	0.186318	0.116761	0.838907	0.143048	1.38318	0.144545	1.243	1.04578	0.541199	0.0255391	0.0269422	0	0.205389	0.289728	0.10065	0.641592	0.629513	0.023985	0.868544	1.70611	0.406263	0.0962141	0.233182	0.392717	0.595919	0.0308156	0.171879
ADCY5	0.62648	1.00276	0.752578	3.17361	3.49674	4.72706	0.989548	2.68878	0.647268	2.43564	0.831343	0.466577	2.74397	1.61217	4.06371	3.83317	0.382012	2.04632	3.44642	1.37907	5.11286	1.28209	2.95031	2.02097	5.16474	4.9117	1.136	3.71382	3.75075	0.244167	5.17323	5.67884
ADCY6	0.548819	2.97165	3.03236	4.25986	3.30292	4.40112	3.81902	4.67225	2.74549	3.45038	2.21942	2.08334	3.61276	3.11971	4.51983	4.21218	2.03652	3.50491	4.84582	3.95084	4.92023	3.86466	4.01135	2.92564	4.72944	4.5047	2.84222	3.37604	2.87272	4.15262	5.25206	4.29845
ADCY7	0.579865	2.2237	1.36706	0.425493	0.716943	5.57173	0.0455801	1.93137	1.92022	1.45567	0.830054	1.17013	1.04485	2.79211	1.72591	1.23099	1.75992	1.15384	1.86173	0.538276	2.68251	1.10013	4.26742	0.660045	0.318178	0.530439	0.375652	1.55476	0.967829	0.684216	2.10946	2.64645
ADCY8	0.0108369	0.356249	0.0673023	0.0727735	0.875898	0.156704	7.06208	0	0.0551751	0.0157958	0.136678	0.0428064	0.0493885	0.158007	0	0	0.0797366	0.0142039	0	0	0.528892	0.215907	0.00625643	0	0.473473	0.923741	0	0.730982	0.154671	0	0	0.225182
ADCY9	0.101308	2.76053	2.6607	2.94278	1.68208	2.9963	1.8396	1.53103	2.6429	2.14478	2.59404	2.0468	3.11052	2.48694	2.35933	2.31887	2.5061	2.43161	3.3741	2.44036	3.99698	1.85517	3.20045	3.0014	3.93656	4.28268	1.37224	2.05118	2.81989	1.56007	2.82245	3.45612
ADCYAP1	5.36181	5.3911	3.26725	7.30262	5.08443	2.65771	4.74636	1.60585	1.0361	8.12576	7.0732	1.75044	5.2857	6.01683	0.353192	4.04225	4.74738	9.18856	3.34289	1.13682	3.7709	7.72985	6.47481	8.61752	4.81091	4.51513	5.2713	5.9506	7.26441	4.62367	0.196309	1.99524
ADCYAP1R1	0.0181934	3.35761	0.262779	0.112953	1.02153	0.185413	5.83478	0.110704	0.271797	0.116998	0.0815679	0.0371894	0.110778	3.51595	0.00537394	0.0631293	1.77914	0.283128	0.565202	0.313747	5.0398	1.12472	0.0197444	0.458005	3.60573	2.95969	0.0132108	1.50823	0.855086	0.40027	0.00436213	0.0151729
ADD1	5.35536	6.15755	6.00472	6.32129	6.29155	5.12829	4.31916	5.5852	5.33279	5.81543	5.0883	5.56511	6.38344	5.70973	5.91429	6.57486	4.54771	5.08367	5.57044	6.29687	6.214	5.29019	5.24719	5.49715	6.14444	6.08951	5.26722	5.43713	5.62869	5.54238	6.38281	5.91959
ADD2	4.15192	4.52997	5.12943	4.24994	5.73932	3.02646	4.90754	3.08148	0.423865	4.47821	4.38283	4.78623	5.12088	6.37708	4.10717	6.10495	3.23786	4.98298	3.62129	4.48053	4.56371	4.2318	4.27924	2.74083	4.27126	4.41755	4.1851	4.85834	5.39718	2.89082	4.66369	3.83713
ADD3	3.34378	4.51777	3.85227	4.93352	3.98104	5.99426	4.16173	5.82664	4.55069	5.402	1.69286	2.78117	3.33604	4.12331	3.03186	5.42195	2.54042	5.50613	2.16967	3.88164	3.04349	4.64792	2.2622	4.9223	2.82915	3.00434	1.08166	4.14239	4.13983	5.14272	3.72082	3.92846
ADGRA2	0.508912	2.7211	2.22317	0.169369	0.625898	1.60607	4.25597	0.259365	2.51993	0.460225	1.67108	1.25999	0.567706	2.55117	0.497648	0.387466	1.25473	0.751671	0.378581	0.763054	0.0625272	0.274047	0.544825	0.0465239	0.0118033	0.0874302	0.136747	0.192778	0.214319	3.78963	0.232608	0.377455
ADGRA3	2.88878	4.09809	3.99642	3.98153	4.46159	5.07125	5.10362	3.88249	3.90301	6.02594	3.03722	3.61577	3.80634	4.33937	2.78653	4.43847	3.35334	4.38372	4.7971	6.25434	5.80939	4.91752	4.31562	4.88826	6.23953	5.47685	2.55222	5.20952	5.30556	4.79883	3.90623	4.68625
ADGRB1	0.0539674	3.82981	4.93408	0.0150396	0.212475	7.88925	5.15728	0.858031	3.58533	1.65794	4.34581	4.05449	0.315463	1.96119	0.305541	1.67639	2.75054	3.17911	5.33455	2.28692	5.86342	3.72555	5.71066	3.05746	6.50082	3.88821	0.552729	0.639146	0.322125	0.149001	1.18322	6.35078
ADGRB2	2.00422	4.50314	4.93609	3.45038	3.46509	5.06001	5.83805	3.48364	4.8114	3.78023	3.53026	4.80183	3.14628	2.51273	2.94355	5.54427	3.86704	5.20342	3.54708	4.83951	4.49298	6.01314	4.72893	5.15544	3.99644	3.95989	3.23954	5.46868	5.67476	4.95048	3.67756	3.40682
ADGRB3	3.53743	1.52969	3.39232	0.607217	1.81776	4.23106	1.76041	1.92979	0.0754635	4.15363	3.50921	3.66363	3.17813	1.7853	2.78284	4.43196	0.0253188	3.78884	3.349	3.13439	3.13265	2.79445	4.95345	4.0291	2.70299	3.37481	0.503558	3.42735	3.92089	0.0726834	2.94642	1.33366
ADGRD1	0.0245114	0.311673	0.614947	0.00662367	0.0366629	1.967	1.34969	1.73639	0.137341	0.0325158	0.0116392	0.0877225	0	0.274411	0.915277	0.548063	0.0260026	1.55136	2.48342	0.397178	3.63653	2.31357	0.358843	0.224959	3.72245	2.83076	0	0.0143481	0	0.674086	1.43348	2.67258
ADGRE2	0.398056	0.523779	0.844849	0.610159	0.918017	0.453687	1.3521	0.359393	0.388101	0.312322	0.470226	0.93814	0.472656	0.661161	0.19178	0.319916	0.247703	0.260178	0.308633	0.39441	0.313039	0.33798	0.347245	0.191489	0.52266	0.320489	0.153392	0.293978	0.242098	3.72328	0.42935	0.313476
ADGRE5	0.228952	0.184118	0.21782	0.160553	0.192057	3.80602	3.0673	2.71175	0.628518	0.353163	0.123016	0.0652676	0.113817	0.370053	0.327686	0.37376	0	0.091018	1.20583	0.495173	1.28143	0.0910503	1.86129	0.211708	1.17583	0.941531	0.319365	0.187384	0.344096	1.55603	0.231371	1.94031
ADGRF1	0.101056	0.117467	0.256545	0.244205	0.214677	1.09095	0.185806	1.58921	0.870735	0.217805	0.48044	0.0774239	0.403074	0.216279	0.0771184	0.00377075	0.0772065	0.191941	0.296094	0.170039	0.769325	0.275912	0.120201	2.113	1.41618	0.527204	0.250029	0.263296	0.513731	1.95054	0.0946886	3.31501
ADGRF2	0.107759	0.00395199	0.929966	0.103565	0.0613758	1.24871	0.130395	0.28926	0.00107627	0.0352897	1.35984	0.131927	1.08008	0.00133171	1.7239	0.270665	0.000102892	0.464487	1.84173	0.0123865	1.52457	0.104807	0.080653	0.0689043	0.215042	1.5116	1.02955	0.115604	0.255885	0.788819	3.80122	0.277641
ADGRF3	0.475363	0.650231	0.472405	0.163163	0.207381	0.640334	0.271752	0.206786	0.645788	0.276946	0.395124	0.198004	0.297965	0.705692	0.180278	0.300173	0.336074	0.426567	0.638752	0.239478	1.24963	0.353032	0.942635	0.303173	1.21773	0.783693	0.297766	0.411332	0.529834	0.318355	0.221401	0.487364
ADGRF4	0.059654	0	0.488144	0.0598934	0.0109219	0.751046	0.0781341	1.41631	0	0.0349601	0.682071	0.121091	0.494392	0.0185891	0.860987	0.0327956	0	0.407547	0.655345	0.0188486	0.399696	0.098551	0.150146	0.0890542	0.0747507	0.391041	0.401633	0.121057	0.0837608	1.38925	2.74263	0.399888
ADGRF5	0.174745	2.9526	0.311301	1.14802	0.205573	0.79528	0.0447628	0.188776	4.38558	0.295198	1.01159	0.0401924	0.281398	0.953663	0.246546	0.139914	3.18243	0.261893	0.452594	0.0312874	3.99429	0.168849	0.0633611	1.59145	4.8991	3.44069	0.341905	0.59185	0.492618	2.19055	0.595201	0.767322
ADGRG1	6.28458	5.09703	4.41616	6.80098	4.77182	6.00305	1.1034	6.37198	4.39655	5.0499	5.19342	3.80057	4.44438	6.26039	5.74062	7.10185	4.57231	6.04775	3.71534	5.39866	3.7587	4.05155	6.05663	5.88001	3.56231	4.27348	5.2101	2.40251	4.52101	4.8099	5.83802	6.78085
ADGRG2	0.066236	1.56272	0.273255	0.398435	0.0437922	0.992816	1.67535	0.805606	1.66351	0.0525111	0.0694816	0.0530902	0.0189391	1.25247	0.0361914	0.0926574	0.0905407	0.146957	0.343255	0.0874426	0.966336	0.127374	0.863105	0.0629664	2.41522	0.474919	0.106725	1.01838	1.95844	0.105341	0.0918108	0.705629
ADGRG5	2.21206	0.0131699	0	1.34079	0	0.0065221	0.00615425	1.8298	0	0.0757734	0.0156772	0.00673194	0	1.67744	0.0462414	2.52832	0.857484	0.0464313	0	0.0143082	0	0	0.0370289	0.00750151	0	0.0122418	0	0	0.015019	0.00709823	0.0312589	0.797464
ADGRG6	0	0.146606	2.04061	0.0981436	0.058214	0.68749	0	2.09049	0.686621	0.0767627	0.148517	0.971809	0	0.24417	3.19207	0.0176196	0.281608	0.0309708	0.00962789	0.15307	0.148844	0.385308	0.618666	0.0206655	0.224801	0.995245	0.0173902	1.64178	2.84158	2.31135	2.33514	0.809422
ADGRG7	0.0466999	0	0.0168305	4.36077	0	0	0	0.0275263	0	0	0.0291033	0	0.0181575	0	0.0120497	0	0	0.0118455	0	0	0	0	0.0272504	0	0	0	0	0	0	0.0137154	0	0.0145708
ADGRL1	4.96496	5.68885	5.61529	5.14708	5.65255	5.95749	5.1753	5.20223	5.02989	5.56365	5.29329	6.02186	5.61885	5.71914	5.20936	5.99409	3.74106	5.02129	5.51883	5.75977	5.73034	4.48773	5.48074	2.2852	5.4284	5.9459	5.20931	1.93458	2.20792	4.66857	5.69951	4.63619
ADGRL2	0.806678	4.28157	4.34483	3.63899	1.01714	4.32446	2.54275	2.85632	0.383837	4.47154	2.33763	4.95863	1.94999	1.45414	3.68804	4.94866	0.47619	3.20811	5.03929	4.27641	3.75285	6.53286	2.69671	3.86107	4.60574	4.38717	1.64236	4.11846	3.28061	3.72077	6.88045	2.01811
ADGRL3	3.38937	3.368	2.80036	2.75305	4.25222	2.1643	2.40155	0.128982	3.78563	3.58442	2.29776	1.99138	0	3.591	3.06808	0.018578	2.84961	2.81104	2.33542	3.10298	2.0642	0.013318	5.1245	2.44035	3.83213	3.49405	0.625818	2.87855	2.6273	1.62545	5.12736	1.32689
ADGRV1	2.00793	2.84652	3.39089	4.39475	4.10959	4.11901	3.58465	1.77877	2.40558	3.10163	3.41265	2.88253	3.5538	2.56502	4.14998	3.50517	0.880779	3.30335	3.31987	3.7381	3.45205	3.10526	3.71959	2.93885	3.12969	3.21884	2.41208	0.0683183	0.0364543	1.19972	4.59776	2.83854
ADH5	5.04438	6.01504	5.68388	5.68023	6.06466	5.60909	5.90921	5.66221	5.27554	5.56944	4.81726	5.70211	5.97534	5.57744	6.19017	6.52422	4.55728	4.84433	4.98097	6.35932	5.77099	5.51228	6.33079	5.43888	5.81212	5.55462	4.69968	6.14971	5.97981	6.5523	6.14659	4.97658
ADHFE1	0.989373	0.332625	3.0855	0.315141	0.737629	0.945705	0.304837	1.57277	0.791709	0.383306	2.02938	1.32506	1.75315	0.189084	0.715372	1.89381	0.0539388	3.8909	1.86404	0.203958	1.77911	0.90134	0.744303	2.11824	1.56949	1.34294	1.16675	2.61334	3.09793	0.927853	1.87229	0.827317
ADI1	4.87821	5.69548	5.49419	5.7406	5.98333	5.32334	5.07445	5.04822	6.66042	5.38037	5.99671	4.6247	5.62645	5.00186	5.39881	6.22144	3.6068	5.20141	4.30459	5.16498	5.36344	4.56682	5.63825	6.45379	5.67884	4.34691	5.46013	4.13582	5.4028	6.19897	5.5459	6.04944
ADIPOR1	6.11249	6.17375	6.6471	7.05164	6.81195	6.78127	5.98659	5.91982	6.91707	6.30503	5.58691	6.22189	6.51108	6.27972	6.17904	7.04117	5.27761	6.01611	6.88352	6.34622	6.95518	6.30494	6.45969	6.66819	7.09187	6.68822	6.45055	6.24226	6.46707	6.39428	6.65592	7.24499
ADIPOR2	4.26943	4.91023	5.1997	5.16108	5.67298	5.29794	5.2349	5.57089	6.0961	5.20051	4.93821	5.11017	4.72248	5.67947	5.28699	5.69649	3.33417	5.4136	5.13429	4.24251	5.08505	4.74089	4.54414	6.03549	4.75663	4.70137	4.33257	4.7629	5.03359	4.98593	5.8936	5.68259
ADIRF	4.17394	6.61549	4.52629	7.04963	2.63076	7.01584	0.182465	4.06751	7.15255	7.52523	4.30623	2.97602	6.54842	0.675545	4.4594	5.81718	1.74171	5.64842	6.7129	3.54059	8.47095	4.36278	7.32905	2.42664	8.95062	8.15522	1.49506	4.67618	3.55051	6.50377	2.8249	0.527408
ADK	5.94818	5.13729	4.80675	5.02082	3.98951	4.7149	4.07391	4.33787	4.78971	4.44748	5.04894	5.34878	4.92031	5.01998	4.69848	5.42988	2.78066	4.61	5.38048	4.62706	4.92477	4.20179	3.97524	4.52946	4.90274	5.02409	3.20018	4.93307	4.91285	5.40992	4.95222	3.78261
ADM	1.5874	4.858	1.90383	5.24954	3.63604	6.07196	3.59302	1.85842	1.60524	1.95246	3.36663	2.04044	3.17312	0.367409	5.51211	0.927335	0.553843	2.55711	3.96765	3.15806	3.12262	3.23531	4.0739	2.95256	2.34499	3.62663	3.81954	3.02782	2.31823	4.30866	5.2484	3.09493
ADM2	1.08197	3.41743	2.96639	2.22641	1.70157	3.68423	4.48923	1.57211	4.35286	2.11396	2.20071	2.76416	1.93822	2.53965	1.16805	2.19141	2.56843	2.73412	2.58123	2.83977	0.927207	1.56566	2.80453	2.39518	1.20095	2.2568	0.76708	2.03174	2.26263	2.32386	1.72488	1.81385
ADM5	1.24659	2.60873	1.87361	1.11612	2.17086	1.81401	1.04315	1.69557	1.26566	2.18808	1.59575	2.02133	1.66921	3.25332	1.73957	1.90337	0.916466	2.23855	1.56441	1.58887	1.23278	1.36593	1.11483	1.58093	1.55861	1.48278	0.616315	1.06281	1.39758	4.11619	2.57392	0.998392
ADNP	5.78742	6.14031	6.32108	5.74436	6.28949	6.37782	5.81662	6.067	6.23206	5.61148	5.83723	6.09287	5.69651	6.91075	5.03351	6.21967	4.63989	6.11963	5.98022	5.85424	6.06866	5.7756	5.90527	5.79909	6.06583	6.1402	4.85994	5.97565	6.03699	6.45115	5.88297	5.64293
ADNP2	3.56224	3.87821	4.46702	3.84432	4.48099	4.568	3.48265	3.66245	4.54074	4.46252	4.16762	4.73674	3.92469	4.85509	4.02091	4.65909	3.5591	4.45007	4.24747	4.79469	4.72259	4.25797	4.33894	4.46782	4.22649	4.5067	3.63709	4.53149	4.68675	3.77589	3.90915	3.5447
ADO	4.58661	4.20885	4.00725	4.19649	4.32612	3.86383	3.92515	3.34635	3.57514	3.99922	2.95762	4.04166	4.03811	4.21061	3.94503	4.07977	2.78848	3.99025	4.00833	4.54151	4.28569	3.81022	2.98455	3.35753	4.15914	3.85571	2.46493	3.99151	3.9822	4.08436	4.26133	3.73728
ADORA1	1.0347	1.72344	4.80825	3.12989	0.43236	1.38457	2.6546	0.355654	4.6238	3.72421	1.42846	3.64037	2.23675	2.19616	2.32431	1.35866	2.91175	0.497759	4.49349	1.28742	4.77974	3.49034	3.48489	1.35107	3.41394	3.53126	0.889531	2.75393	3.28154	2.46994	2.18039	0.798228
ADORA2A	3.16694	3.7955	1.79012	1.89581	1.9176	2.31586	3.99511	1.2	1.52897	2.26971	3.36206	1.89648	1.62619	3.67224	4.02168	2.08636	1.33678	1.97662	1.02303	1.19091	0.728555	1.67562	1.23492	1.04283	0.888352	1.17261	1.40469	1.18419	1.03288	0.883265	4.27071	1.5111
ADORA2B	0.504982	1.12981	3.40824	0.436169	1.73983	1.33832	2.16991	1.25167	2.17921	0.170061	1.98784	3.20378	1.35874	1.49375	2.63309	0	1.11101	0.704847	0.940122	0.706538	0.895779	2.06705	0.874481	0.551332	1.28367	0.486709	0.0474736	1.22525	2.0126	0.586287	3.51854	0.192591
ADPGK	4.09437	4.49592	4.38724	3.78575	4.48211	4.43214	4.89787	4.96431	4.22022	4.06657	3.93927	4.6691	4.5939	5.61689	4.09261	5.20258	4.02157	4.36548	5.13183	4.21128	4.75201	4.92933	4.2442	4.18228	4.69381	4.67121	3.34445	4.4299	4.66079	5.34327	4.26962	4.49488
ADPRH	1.36921	0.10545	0.672808	1.70361	1.21014	1.38017	0.147393	1.17476	1.25095	0.243185	0.448814	0.529289	0.659428	1.25844	1.68945	0.222342	0.0461559	0.162287	0.913293	0	1.07531	0.701716	0.801134	0.0705003	1.63049	1.73408	0.177938	2.30665	2.18499	1.44794	1.21965	1.10133
ADPRHL1	1.16467	2.99007	3.18194	2.54373	1.21727	1.66058	2.02566	3.90393	4.98206	2.26347	1.83986	2.6011	2.34283	3.9986	5.45594	5.73624	4.41205	3.12115	2.47965	1.42741	2.66539	1.65669	1.98373	1.93261	3.05951	2.24595	1.79544	2.23567	2.97073	2.21621	4.0851	1.87844
ADPRHL2	4.3918	4.99403	6.1267	4.22063	5.30339	5.31995	5.41284	5.92399	5.33409	5.63332	4.80756	6.13626	4.72535	4.46164	5.11896	6.39788	4.04822	4.8473	5.43621	5.20146	5.48158	6.07705	4.88615	5.48384	5.56091	4.88047	4.05805	5.16824	5.24813	4.6861	4.99674	5.20262
ADPRM	2.92642	2.86359	3.61749	3.20155	3.51438	2.57445	2.68322	1.86557	2.25826	2.81547	2.95303	3.28176	3.37108	3.10773	2.60874	2.44066	1.88136	2.57681	2.40263	3.1186	2.08532	3.3745	1.61546	1.93254	2.02563	1.05465	1.44591	2.57511	2.35246	3.2049	3.16289	2.1518
ADRA1A	0.0262548	0.710342	0.104473	0.406184	0.43969	0.1144	0.432855	0.153202	4.91968	0.190115	0.0737125	0.149039	0.159934	0.244109	0.0573583	0.124466	3.13901	0.0961189	0.0772993	0.0763686	0.256897	0.552503	0.146928	0.0860371	0.581276	0.124969	0.0677025	0.189955	0.170034	0.135599	0.106835	0.124112
ADRA1B	0	0	0.176736	0.390435	0.118492	2.23529	0.14417	0.622109	0.0462827	2.59888	0.0549438	0	0	0.527398	2.82331	0.779168	0	0.361716	3.11984	0.100635	3.16669	3.01948	2.67747	0	2.09621	3.35064	0.0204121	3.14008	2.74556	0.0164113	0.0199537	1.80369
ADRA2A	1.69389	4.16363	0.0713453	3.65745	0.10843	4.57749	1.4852	2.45927	2.70209	0.187155	1.12341	0.0183299	2.49977	0.267371	1.11463	5.62035	0.509851	1.64563	4.9113	2.63125	4.91858	4.58582	1.41585	4.75716	5.84046	5.33631	0.180791	4.53409	4.32574	1.93169	3.1857	4.89532
ADRA2B	0	4.93708	0.891047	0.0233125	0.689911	0.68083	0.15308	1.88633	1.75912	0.345437	0.536048	1.04378	3.22497	0.441682	0.11464	0.461966	0.131039	0.27389	0.501896	2.24757	1.18828	1.41796	0.129408	0.394994	1.18695	0.587854	1.03955	0.432025	0.54324	2.87598	0.507706	0
ADRA2C	0.0418785	6.25197	1.32241	0.169317	1.42507	1.9085	2.51118	2.06133	3.64028	0.468053	0.779754	0.254415	0.240089	1.86529	2.86791	4.28156	4.21241	3.41016	2.17426	2.92499	4.50416	3.81457	3.27574	4.40032	5.22313	3.15679	0.0903783	0	0.0457929	3.13987	0.526271	0.992464
ADRB1	2.01505	0.487207	0.0708043	0.0134309	0.0898907	0.507623	0.938444	1.76029	0.130472	0.055687	0.170878	0.0691435	0.0159485	0.744346	0.0993652	0.475353	0.247209	0.0648132	0.0301206	0.13087	0.0334251	0.100001	0.428169	0.371074	0.147155	0.0941226	0.0349515	0.0605078	0	0.105685	0.444236	0.353537
ADRB2	0.157908	0.127707	0.358368	0.178485	0.280283	0.673462	0.125021	0.361177	0.155471	0.140859	0.694591	0.144642	0.740123	0.334379	0.126858	0.178428	0.0308446	0.119339	0.122843	0.485795	0.761474	0.296797	0.210085	0.100607	1.09339	1.292	0.177726	0.602146	0.583435	1.1273	0.159848	0.337638
ADRB3	0.0207999	0.240541	0.0271597	0.0222676	0.0010434	0.059965	3.2819	0.000676752	0.0486322	0.0202577	0.0697242	0.0221205	0.0645595	0.0756603	0.0466066	0.0372011	0.000239638	0.026431	0.0227214	0.021836	0.000268336	0.0744926	0.135534	0.0567071	0.0704889	0.0370738	0.000438525	0.0239241	0.0555533	0.0342121	0.0325044	0.0531077
ADRM1	7.29493	6.89326	6.79956	6.43985	6.48257	6.88685	6.76049	7.09073	6.89926	6.6185	6.4599	7.1674	5.85256	6.34687	6.49549	6.90463	5.64751	6.33156	6.65434	6.22488	6.11794	6.5109	6.33045	7.02688	6.08481	6.2309	5.10831	6.30019	6.22667	7.83506	6.55752	6.92294
ADSL	6.26333	5.83064	6.25518	5.10406	6.19335	5.81617	6.57721	5.08016	6.43133	5.0267	5.73167	6.34746	5.41603	6.50148	4.80041	5.49909	4.84889	5.7158	4.79199	5.66044	4.40791	5.21905	4.58543	6.45901	4.34529	4.76663	3.86989	5.31648	5.29344	5.1393	4.97158	5.13823
ADSS	5.01071	4.73865	5.05366	4.70967	4.45997	5.53418	5.07392	4.61713	4.97401	5.0018	4.16213	5.60029	5.64881	4.73695	4.8965	4.83234	3.80527	4.39347	6.27503	4.88728	5.31553	5.29478	4.9272	5.2779	5.47182	5.17394	4.27239	5.01593	4.94554	4.87914	5.48593	5.22553
ADSSL1	3.11418	2.65562	4.99524	0.690435	2.5995	4.28736	1.17436	3.92219	3.28914	2.9807	2.95794	3.36227	2.62254	0.851037	4.54788	4.05585	0.378949	3.1418	3.13289	1.2527	3.66943	3.78152	5.10064	4.45807	3.78128	3.589	4.50173	1.87806	2.11194	0.485487	3.74788	1.91101
ADTRP	0.064699	0.0468388	0	0.22661	0.092442	1.42565	0.0225318	0.415821	0	0	0	0	0	0	0.0224734	0.0859861	0	0	0	0.18864	0	0.0538076	0.0636234	0.0870775	0	0.0246606	0.339317	0.138871	0	0.374484	0.781484	2.77145
AEBP1	3.35401	2.46514	1.74179	1.14244	3.14671	4.56317	4.82411	2.32364	0.62211	2.18568	2.37631	2.08605	1.0013	2.65629	3.3565	2.51808	0.917657	3.09816	0.988477	3.46558	1.74723	2.46334	3.0557	4.36062	2.28929	3.67202	0.784593	1.15826	1.11351	1.43464	4.3304	1.19938
AEBP2	3.45582	3.52605	4.34397	4.29936	4.41635	4.78272	4.34322	3.23615	3.51144	3.9297	3.63208	4.03371	4.15082	4.325	3.60362	2.66205	1.85877	4.37901	3.93832	3.07356	4.13146	3.51592	4.03848	4.50323	3.89389	3.77654	2.91415	4.06048	4.1661	4.05768	4.91318	4.17147
AEN	4.83884	3.6417	2.7876	2.81882	3.82917	3.24455	3.7118	3.54508	3.57549	2.99506	3.33636	3.27591	3.99785	5.10817	3.30346	3.51431	3.08507	4.29321	4.13096	3.13383	3.73396	3.3073	2.82983	3.93814	3.56568	3.76125	2.13466	3.61246	3.42721	5.11296	2.86551	2.67117
AES	8.69159	8.95773	9.37631	9.67796	9.98894	8.95549	7.95717	8.42488	9.76139	10.0367	8.4223	8.6834	10.3818	8.63155	9.54409	9.6072	6.52429	9.78614	8.98798	9.74013	9.03297	8.94145	9.42078	9.63746	8.98696	9.07422	9.04264	9.30548	9.53895	8.39879	9.30502	8.54063
AF011889.5	1.81473	2.73356	3.2127	3.24175	2.43755	2.81454	0.989818	2.70273	2.6846	2.11785	2.16107	2.32872	1.75418	1.69273	0.893274	3.02276	1.70752	0.567957	4.31452	1.77521	3.60075	2.54584	2.83591	0.96	3.61399	3.18875	2.05579	1.97364	2.45422	2.35212	2.34293	2.44727
AFAP1	0.113166	4.98458	3.29463	4.42125	3.37408	3.4407	6.05529	3.13604	4.44533	4.78299	2.96497	3.02725	3.93585	6.53876	2.7672	3.55625	3.82654	3.80882	3.13129	3.86514	4.20442	3.97842	3.0479	2.4701	4.00178	4.42407	2.03718	2.8946	3.13923	4.71594	1.7411	2.73482
AFAP1L1	0.567733	1.06583	1.70416	0.203387	1.07782	0.681784	0.258005	0.782228	2.0014	3.78226	1.2853	0.77782	0.215948	3.27438	0.122746	1.21675	0.185952	1.57641	4.51002	1.60836	5.94921	3.31945	0.273782	2.1271	5.87082	5.78073	0.137692	2.48527	3.78389	0.115595	0.200686	0.613513
AFAP1L2	0	0.166976	0.883478	0.363674	0.985416	0.752121	0.45298	3.28596	0.465454	0.0435909	0.198126	0	0.53812	2.06501	0.553598	2.21247	0.0231076	0.148273	1.82525	0.86308	0.862102	0.112259	2.14025	0.0681793	0.583067	1.51904	0.229004	1.62116	1.71736	0.117878	2.08993	3.08701
AFF1	3.24611	3.75519	4.09088	4.56349	4.24984	3.96808	4.18742	3.62805	2.82056	4.1728	3.23639	2.92977	3.59179	1.73867	3.62358	3.87158	1.23961	3.65167	4.26219	3.90576	5.57963	3.79539	5.67367	3.89245	5.40097	5.39482	2.81364	4.01768	4.39069	4.47821	4.71489	4.07929
AFF2	0.396408	0.0308461	0.100407	0.0119702	0.493442	0.0177288	4.66919	0.145238	0.000853726	0.0159118	0.112758	0.401569	1.609	1.33109	0.0035886	0	0.00861158	2.13902	0.0198501	0.798221	2.66482	1.48887	0.0209739	0.00539645	1.40024	1.90631	0.188745	0.00885896	0.0120119	0.00239683	0.0407026	0.122003
AFF3	0.291647	1.5858	1.56555	0.133643	4.13601	0.444026	2.07869	1.10196	1.32297	2.2216	0.156635	2.09475	0.339974	3.36439	0.284111	2.33641	1.5448	3.92511	0.461607	0.798367	2.40395	1.15776	0.227873	1.50717	2.78812	1.15473	0.104167	0.230572	0.470055	0.184425	0.188075	0.333386
AFF4	3.79583	4.4196	4.65572	5.25733	5.01286	5.64907	4.37109	4.20292	4.41296	4.53454	3.87022	3.97065	4.82761	4.72753	4.85894	5.4421	3.25184	4.8549	5.41906	5.0466	5.82886	4.68506	5.11241	3.98978	5.74733	5.43288	3.13307	4.45151	4.62098	3.94546	5.30164	4.66631
AFG3L2	6.69353	5.07354	5.62682	5.86356	5.20503	5.74329	5.28796	5.53267	5.48847	5.3818	5.76111	5.97756	5.34673	5.51603	5.96293	5.8235	4.76903	5.6266	5.75943	4.87703	6.20631	5.32827	5.38115	5.69439	5.73384	5.85341	4.9471	5.92302	6.32462	4.41491	5.93846	5.32536
AFM	0.0262546	0	1.21916	0.108809	0	0.38058	0	0.0234843	0	0.0144825	0.0563194	0.346276	0.0200632	0	0.0149534	0	0	0	0.261075	0.0282247	0	0	0.0305678	0	0.05965	0.0258586	0	0	0.0301255	0	0.0153574	0.103695
AFMID	6.14772	5.14575	6.32622	4.48829	5.79705	4.92729	5.89571	4.07823	4.01447	5.48229	5.36835	5.85563	5.7783	5.37503	4.36042	4.16208	3.38656	5.03762	5.16978	5.03547	5.44082	4.78835	4.09094	4.45588	5.41741	5.31994	5.71105	4.9687	5.4605	5.59259	4.2526	5.03369
AFTPH	3.96251	4.11797	4.50952	4.50896	4.90829	5.21979	3.97504	4.54247	4.81789	4.1334	4.3715	3.51254	4.83005	3.89406	4.33331	4.7775	3.14303	4.36927	4.26569	4.34084	4.93903	3.86055	4.76078	4.89096	4.70176	4.43505	4.38184	4.28703	4.80876	4.9736	5.18086	5.55493
AGA	3.11288	3.43057	1.36062	4.95468	2.33483	3.09963	2.57979	2.65626	3.75816	3.10851	0.385616	0	3.18132	2.35027	3.17116	2.76528	2.43973	2.56416	3.89389	2.49826	4.33563	2.13811	1.47861	2.84585	4.90124	4.1516	3.30295	3.6706	3.75686	2.49952	5.04532	3.43615
AGAP1	2.90485	4.29235	4.47399	4.22157	4.86548	5.46275	4.6398	4.63766	4.3258	4.54174	4.00479	4.67684	4.64786	5.27045	4.45303	5.19007	3.2052	5.78973	4.14275	4.36058	4.93989	3.73784	5.36264	3.71539	4.3943	4.86663	2.64871	3.72156	4.58201	3.85501	4.7412	4.75666
AGAP14P	0.637909	0.761493	0.33677	0.014025	0.0138665	0.0335369	0.56779	0.15397	1.12668	0.0169329	0.262001	0.441282	0.839711	0.132998	0.19427	0.720439	0.0717017	0.896626	2.03935	0.461994	0.977893	0.650558	0.0560203	0.293525	0.667935	0.689613	0.00744	1.05326	0.863048	0.564572	0.415561	0.0843428
AGAP2	1.58527	1.87795	1.16055	0.536676	1.27585	0.310652	3.97242	0.899455	0.862993	1.52845	1.35296	1.17916	1.2188	3.732	0.521973	1.15861	0.821547	1.96577	0.122236	1.55679	0.125774	1.16289	0.835021	0.368811	0.173796	0.200725	0.160996	0.233524	0.243014	1.49561	0.184281	1.02872
AGAP3	6.10832	5.87503	4.94618	5.60269	6.07475	5.59721	6.01346	5.30949	6.87616	5.32626	4.58907	4.67975	4.70152	6.93962	3.71417	6.09164	5.18165	5.8837	5.24174	4.98683	5.08183	5.69387	4.48167	5.99711	5.03562	4.47929	4.3413	4.90235	5.03139	5.07194	4.47386	5.27585
AGAP4	2.67364	3.14997	2.50189	2.51688	1.61672	2.94633	3.4172	3.31865	2.6271	3.2286	2.06758	2.74741	2.92205	2.96203	1.86486	3.38008	1.35712	3.04403	3.62027	3.06178	3.69355	2.9212	3.45678	2.61535	3.71576	3.28086	1.57632	3.48253	3.19555	3.18088	3.07154	3.25901
AGAP5	1.53835	2.20398	1.75858	1.75022	1.03257	2.45787	1.64195	1.76348	2.14104	1.92868	1.3153	1.58979	2.26911	2.01989	1.0826	1.84593	0.974391	2.16188	2.25843	1.67387	2.26801	2.46809	1.41614	1.60826	2.69086	1.85491	0.753036	3.04827	2.37998	1.78394	1.54131	2.0005
AGAP6	3.65123	4.46469	3.44426	3.45041	3.05973	4.02488	4.56929	4.13563	4.9894	4.05582	3.00797	3.80316	4.16666	3.6714	2.67837	4.09422	2.57445	3.74122	4.5092	3.5612	4.77473	4.60653	4.24571	2.87147	4.78705	4.39995	2.09751	3.85494	3.77236	4.13262	4.03918	3.86427
AGAP9	3.12096	3.77192	2.70537	2.5105	2.45573	3.12264	2.51999	3.33691	0.91009	3.30168	2.39087	2.83275	1.26716	3.21295	1.86247	3.30435	1.66259	3.49687	2.87057	2.98679	2.99017	4.06546	3.71005	0.824636	3.17095	2.81869	1.47177	3.50222	3.54053	3.12191	3.35209	3.66176
AGBL2	0.556325	0.316879	2.55846	0.61155	1.63816	1.05836	1.10541	1.28378	2.3269	0.383799	1.76091	1.98881	0.78073	0.950783	0.0650475	1.95474	0.72338	1.3944	0.854281	0.760471	0.674002	0.742932	1.09126	0.952042	0.525299	0.626215	0.330727	0.662184	0.924953	0.58319	0.523544	0.701756
AGBL3	0.571068	0.769491	0.888123	1.10795	1.41832	0.750258	0.544812	0.869588	1.08643	0.811988	0.679179	0.540582	0.770259	1.15816	0.715011	1.13942	0.616225	0.693454	1.08804	1.13733	1.21552	1.13232	0.452929	0.648925	1.51799	0.938092	0.83247	0.859003	0.773372	0.770056	0.833637	0.396356
AGBL4	1.77877	1.94841	2.70847	1.67399	1.43261	2.44743	0.312565	1.74049	2.68161	2.67794	2.22313	1.85466	2.38837	0.58509	1.51227	3.59393	0.87665	2.25765	2.49853	1.7208	2.82574	2.26095	1.50961	2.52241	2.7154	2.59074	1.65727	2.26017	1.9797	0.586673	2.81089	1.17321
AGBL5	4.38672	4.9051	5.24005	4.66926	5.72725	4.94365	4.28162	4.74835	5.4032	5.07329	4.32503	4.74007	5.06845	5.50074	5.42103	5.67056	4.55202	5.15495	4.47623	5.36963	5.52807	4.82189	5.49433	5.32711	5.43269	5.1904	4.10206	5.11997	5.52166	5.11056	5.47155	5.10639
AGER	1.47316	3.43397	3.74238	2.32184	3.34867	3.79344	2.76609	3.83517	3.79069	4.04207	3.11948	3.97032	3.79079	3.40422	2.57859	3.22643	2.39653	3.16285	2.84099	4.34824	3.14591	4.23411	2.99969	3.07754	3.21693	3.17342	1.53128	2.05105	2.58776	3.4013	4.10199	2.86737
AGFG1	3.76025	4.58002	4.99251	4.33698	4.81023	5.23595	4.93729	4.76726	4.9124	3.97072	4.27796	4.63577	4.31645	5.58794	4.49502	5.03803	3.38141	4.45385	4.21245	4.89259	4.85588	3.5696	4.79107	4.91009	4.94328	4.58931	3.32308	3.9509	4.33541	5.03418	4.73608	4.71633
AGFG2	1.99813	3.18217	2.28813	3.23964	2.99227	2.03525	1.11903	3.78925	3.92012	1.84721	1.61458	1.30395	3.10768	1.62284	1.82411	3.41877	1.44131	1.8668	2.04407	3.02041	2.51318	2.09633	2.46233	2.03368	2.24756	1.77456	3.04487	1.7875	2.20897	0.984886	2.45633	3.03415
AGGF1	3.78832	3.87216	4.20451	3.31005	4.29868	4.88785	4.37545	4.23146	3.44965	4.56811	3.56411	3.60674	5.01288	4.89048	4.2362	4.88377	3.16479	4.34126	5.05823	4.35622	5.30223	4.08058	4.42935	4.42766	5.09153	4.85715	3.5806	4.17605	4.39754	3.72546	4.83573	4.25286
AGK	4.68104	4.26871	4.39054	4.46059	5.18304	4.34384	4.35963	4.13453	4.794	4.10522	3.8981	4.13914	4.65952	4.0555	3.94809	4.55046	3.03906	3.68312	4.76283	4.21161	4.2578	4.41643	4.27597	3.82564	4.242	3.91776	3.885	4.23733	4.63121	4.14585	4.42763	4.71854
AGL	4.33057	3.33105	5.08664	3.36706	4.02568	3.87814	2.29731	2.79868	4.03557	4.39854	3.68423	5.22118	3.47945	2.46761	3.31233	3.7564	2.26012	3.88723	3.82116	3.77512	3.07327	4.30035	3.30393	4.94271	3.18758	2.97808	2.95951	4.43005	4.70104	3.06007	4.48925	2.8646
AGMAT	2.29845	0.699545	0.962587	0.655326	1.45214	1.10715	0.36242	1.97661	1.32868	0.688524	1.36568	0.870037	0.600761	0.595789	0.26372	0.783074	0.643809	1.0414	1.61124	0.53497	1.16812	1.22537	0.755497	2.51308	1.22302	1.21944	0.86818	1.40087	1.63172	1.09951	0.581576	1.36398
AGMO	2.34695	0.0952867	2.104	0.348167	0.185714	1.16661	0.137542	2.92085	0.163155	0.381199	2.60275	0.341034	1.26822	0.13522	2.34151	3.9258	0.178195	2.32366	0.0632259	0.296428	0.275132	0.162245	0.117689	3.35296	0.120311	0.128874	2.10312	0.209431	0.142556	1.28566	3.16344	0.746799
AGO1	3.41474	3.64192	4.85723	4.18031	5.21809	4.35035	3.55438	4.57276	4.19428	4.17277	3.47886	4.29699	4.00782	3.31077	2.77249	4.57053	2.63835	3.80437	3.98131	4.67653	3.87389	4.40802	4.13951	4.48251	3.75915	3.41166	3.63656	4.22731	4.40178	3.49877	3.64773	4.37607
AGO2	3.53775	4.25857	5.29007	4.90667	3.8019	4.77271	4.55657	4.02904	4.86787	4.55354	4.95449	5.40199	5.15631	5.33944	4.40563	4.32228	3.05793	4.78585	5.05758	3.96276	5.01123	4.51431	4.35945	4.41511	4.9604	4.65223	2.95298	4.01072	4.58427	5.55411	5.49619	4.44808
AGO3	2.71677	2.67294	4.25711	2.76729	3.48388	3.83084	3.41868	3.62906	4.22824	2.95711	3.10249	4.01643	3.00591	3.03808	2.40168	3.78862	1.78717	3.19691	3.1363	3.18061	2.91804	3.56975	2.83085	3.77832	3.16125	2.77187	2.15299	3.66641	3.94404	3.47579	2.81591	3.59169
AGO4	2.74847	2.985	4.1095	2.86502	3.54776	3.3688	2.52727	4.23594	3.68086	3.3004	2.51813	3.82321	3.54081	3.39121	3.0102	4.16757	2.37208	3.37977	4.0695	3.50072	4.01681	4.44198	3.77527	3.79423	3.98368	3.36796	2.74381	3.70378	3.89159	3.21758	4.0857	3.81728
AGPAT1	5.70885	6.28729	5.96345	6.87289	6.13973	6.13146	6.1563	6.19367	6.55134	6.26036	5.71058	6.15815	6.41237	6.56986	6.06263	6.91592	5.04817	5.78733	6.09391	5.90106	6.11406	5.54445	6.70273	5.79738	6.03739	6.21977	5.87305	5.56359	5.74411	5.29868	6.38679	7.07107
AGPAT2	1.009	5.73039	5.30413	6.07294	5.5039	7.7159	4.96818	6.90031	7.91627	5.59035	4.58663	3.86594	1.58126	4.35875	6.95459	7.01365	5.22023	4.64902	6.43776	5.39795	6.41892	5.30776	7.74183	6.79449	6.70958	5.89795	5.47526	5.02866	4.77358	5.30758	5.82307	6.8204
AGPAT3	4.50127	4.45824	4.84669	5.643	5.05598	5.64796	5.35743	4.38791	5.64766	4.57647	4.26411	5.31588	4.96835	4.94539	4.28335	4.46936	3.76418	5.08918	5.62898	3.75639	5.37032	4.36484	5.334	5.58652	4.97609	5.30892	3.6153	4.0718	4.02524	4.18474	4.54183	6.15018
AGPAT4	3.25007	1.77701	2.84393	3.68847	2.98774	3.05761	3.50717	1.96319	1.8515	2.168	3.20944	3.45618	3.2555	3.70677	3.36259	3.5169	1.46113	3.10738	1.77901	3.33991	3.05208	2.01827	1.89803	1.10239	3.22319	3.29909	1.85976	2.14183	2.05607	1.90709	3.10815	2.5976
AGPAT5	5.33219	4.24168	6.59896	4.74055	6.56169	6.83921	5.84657	5.97316	6.17481	5.70825	6.82434	6.07973	4.52999	6.29367	5.60668	6.64448	5.14484	6.32251	6.31248	5.86903	6.74752	5.0641	8.81974	6.35979	6.66159	6.81678	4.70397	5.69881	6.88182	4.27247	5.1921	3.75123
AGPS	4.21335	3.74986	4.45458	3.79245	4.62629	4.84028	4.14938	4.15296	5.00041	4.12485	3.70061	4.16599	3.56215	4.69141	3.98327	4.57628	2.34698	4.09423	3.91338	3.78017	4.20605	3.36106	4.23495	4.92608	3.9654	3.84537	3.03706	3.84583	4.27701	3.50994	4.40166	4.08803
AGR2	8.43312	0.644214	1.84387	4.15854	8.96915	2.17896	0.0316398	5.89848	0.706574	3.28241	3.68583	3.15495	3.07057	0.209852	0.122424	0.551747	0.625263	4.8574	1.74295	2.46464	0.287124	1.48754	1.49015	5.38968	0.991993	0.291792	2.13073	0.510736	2.1363	3.95464	0.601366	4.11636
AGR3	7.49857	0	0.727755	5.33203	7.49781	2.4448	0	4.14242	0.292334	1.17236	2.19712	1.33376	3.14506	0.0624221	0.0684694	0.257797	0.247376	0.477948	0.939723	0.66936	0.269025	0.327519	0.288288	1.87151	0.359812	0.418631	5.25446	0	0.470071	0.211022	2.74192	1.7048
AGRN	0.450485	4.73363	4.43717	0.47582	1.65576	6.41979	4.0844	5.85446	4.90888	1.30207	2.93922	5.03368	2.41946	4.5203	3.99773	4.57025	1.39187	4.80956	5.63912	2.81704	5.40791	4.56282	4.96533	3.54511	5.35429	4.2274	2.78626	2.56459	1.4772	6.38448	3.44735	6.16059
AGT	0.309089	0.302452	0.221176	0.0442676	0	1.79885	0.0689208	0.154165	4.39783	0.602325	0.15764	0.0695525	0.0988135	0.348404	0.150295	1.60374	0.262908	3.7531	2.84986	0.0236618	4.41305	0.753684	0.0126607	4.90132	5.18268	5.40401	0.0642242	2.92332	3.78314	0.0234453	0.065518	2.2173
AGTPBP1	3.70519	4.56401	5.19625	4.29173	4.74448	4.72295	4.02783	3.81478	4.49012	4.35219	4.61706	4.31356	3.76819	6.46414	5.58214	4.99826	3.22935	4.84913	3.80831	3.83815	3.8973	3.88416	3.89008	5.54721	3.86317	3.84423	2.95837	3.63059	4.00764	3.76173	5.78032	2.74578
AGTR1	0	0	0	0	0.0184589	0.103502	0.0301994	2.44592	0	0	0	0	0	0.0932457	0	0	0	0	0	0	0	0.167323	0.033886	0	0	0	0	0	0	0	0	0.0174647
AGTR2	0.0775164	0	0.333659	6.23896	0	0	0	0	0.470647	0	0.0564246	0.0308711	0.111368	0.0313121	0.0152108	0	0.0522789	0.0838051	0	0	0	0	0	0	0	0	0	0	0	0.0444868	0	0
AGTRAP	4.12118	3.6094	5.60003	4.68517	4.70286	4.22169	4.35427	4.7506	6.19222	4.71963	4.20921	5.79058	3.01397	1.97094	3.51646	5.35499	2.67012	4.56062	4.43657	4.29949	4.96622	5.07028	4.43282	6.02778	4.95413	4.02928	4.00699	4.77603	4.9201	5.14145	4.00414	5.34144
AGXT	0.888229	1.09918	0.0393932	0.547832	0.17384	0.436175	0	0.675333	0	0	0.32183	0	0	3.34294	2.55174	0.408766	0.301279	0.0152036	0.0278729	0.0269439	0	0.0147163	0	0.509038	0	0	0	0.029135	0.0338312	0.0135804	2.97913	0
AHCTF1	4.34433	4.34267	4.73706	4.45473	4.21318	4.59608	4.42831	3.72328	4.97922	4.82973	3.56655	4.84373	4.14917	4.76665	4.03224	4.78066	4.112	4.25737	5.58865	4.19799	4.90862	4.50495	4.34116	4.61149	5.07773	4.57913	3.26105	4.63227	4.71844	3.79093	4.69256	4.03657
AHCY	8.07682	7.44506	7.32645	6.53018	7.59158	6.92572	6.40849	6.91436	7.20559	6.89978	7.23686	7.79508	6.58857	8.00709	7.01342	7.68241	5.38087	7.52911	6.62446	6.37306	6.53343	6.40829	6.72892	7.27321	6.49095	6.64199	5.35743	7.11401	7.09265	7.75601	6.8483	6.25605
AHCYL1	5.39594	5.61039	6.60082	5.37856	6.17946	6.32359	4.19121	5.06312	5.49079	5.68688	5.40017	6.09641	5.51813	5.37495	6.01983	5.55765	4.03865	5.60521	5.89036	5.84545	5.57756	6.21892	5.76899	6.19462	5.47312	5.51213	4.67143	5.92621	5.80984	5.29189	7.02523	5.17901
AHCYL2	2.37479	3.1614	2.78987	2.61937	2.47746	2.93551	2.20991	2.67597	1.96031	2.09717	2.09989	2.4226	2.02375	2.98596	1.65303	1.99889	1.66962	1.2461	3.03471	2.32371	3.12153	3.28106	2.06196	2.04683	2.76794	2.82214	1.18253	2.96789	2.91569	2.42218	2.14077	2.68656
AHDC1	3.28366	4.78006	4.81241	4.05419	4.40736	5.62284	4.7854	4.93087	5.26251	5.20743	3.41833	4.32368	2.92086	4.23048	3.43763	5.55919	3.8695	4.66644	4.76302	4.56543	5.3402	5.64869	5.69436	4.98079	5.35628	4.94877	2.81642	4.65912	4.64514	3.82754	4.32319	4.25714
AHI1	4.4167	3.69102	4.47926	4.79453	3.53007	4.37495	3.4294	3.77074	4.83136	4.60229	4.04235	4.20911	3.94943	3.99496	4.48356	4.78373	3.06365	4.47481	4.44679	4.19887	4.78384	3.53457	4.57872	3.80801	4.53207	4.35656	2.56013	4.11594	4.17924	3.56472	5.53862	3.7366
AHNAK	1.07998	1.34442	0.951007	5.26429	0.711038	5.24339	2.32509	3.64498	2.04914	0.201023	1.92872	0.929075	1.34984	0.718801	3.50006	1.78797	0.370684	0.869061	1.35876	1.14715	0.629562	1.67728	2.01392	0.857109	1.69532	0.410509	1.67334	0.425598	1.40549	6.07355	3.16987	3.68769
AHNAK2	0.0761157	2.19856	2.88143	0.00949862	0.295492	3.36999	2.09461	3.77407	2.97869	1.6295	0.221979	0.96957	0.592218	0.645818	0.76528	2.90051	0.190452	0.535668	2.52012	0.973898	2.79752	1.24802	5.11261	0.612759	1.35108	1.79079	0.0215453	1.41763	0.449306	2.84303	0.0705763	0.72555
AHR	3.07233	0.756331	1.74709	2.15151	2.71283	3.08366	0.815562	1.79555	0.383864	1.7394	1.0962	2.14304	0.976363	0.341405	1.55883	0.0790766	0.0719507	2.0172	1.93838	1.00211	1.89702	1.78671	2.32507	0.898769	2.1147	1.46387	0.863124	0.435973	0.123887	1.88166	2.07273	3.48712
AHRR	1.63057	0.890223	2.30739	2.55007	0.896256	3.30055	0.534096	1.97003	1.6101	1.13124	1.53218	1.87543	0.432569	0.719539	0.404409	1.40571	0.548667	1.61099	2.08077	1.14979	2.46052	0.500918	0.735912	1.32344	2.45104	1.54162	0.728489	1.44365	1.64043	0.819132	1.22997	4.32832
AHSA1	6.50278	6.83083	7.62166	5.85608	6.8743	6.4761	7.43177	6.03668	6.68635	7.08607	7.09833	8.06695	7.23718	6.93762	5.56451	5.68595	5.04833	5.57194	6.6857	6.18317	5.75096	6.07968	6.10072	6.21154	5.57441	6.00174	5.0769	6.1325	6.52208	6.82637	6.29857	5.70766
AHSA2	5.10125	5.05052	5.2102	5.28743	5.62283	5.69561	5.21963	5.63883	5.16924	3.5644	5.25316	4.9365	5.41361	5.92033	2.95091	5.19545	3.79879	3.96786	4.22023	4.6651	5.12228	5.16973	5.47391	4.38446	5.61716	4.94773	3.68132	4.52788	5.17451	5.32824	5.2311	5.38137
AHSG	0.31023	0.0304982	0	0.411303	0.0519488	0.160611	1.17331	0.531046	0.250728	0.16869	0.0514734	0.0174828	0.217878	0.865308	0.0542333	0.0591474	0	0.249797	0.672891	0.0344664	0.122773	0.266177	2.00369	0	0.732821	1.85432	0	1.65442	1.00484	0.0324177	0	0
AIDA	4.71165	5.28328	5.55926	5.4237	4.90767	6.35709	5.0822	4.78852	5.76394	5.9561	3.95947	5.46063	4.79856	5.83975	5.42019	5.96157	4.2379	6.08426	6.25542	5.23409	6.23433	5.88828	5.99108	6.33739	6.26547	5.74636	4.85834	6.25404	6.37413	4.85308	5.503	5.4671
AIF1L	0.931558	3.6376	4.54237	2.28661	4.12549	4.18233	3.46918	5.13957	5.37738	4.25685	3.88266	4.6948	4.2219	3.89101	5.35084	5.86	3.15664	5.79776	4.78828	4.86739	5.52184	3.94696	4.31416	6.78469	5.32477	4.37961	2.38936	5.20724	5.41397	5.11928	4.05799	2.40024
AIFM1	5.18082	5.43004	4.85632	4.95449	4.74071	4.73328	4.67858	4.66276	4.89384	4.88566	4.56648	5.05457	4.07165	4.62546	4.61775	4.73716	3.39381	4.19518	5.51555	4.27857	5.49512	4.08537	5.23805	4.74309	5.57748	5.52599	3.53894	5.08148	5.1943	4.9349	4.99739	4.96206
AIFM2	3.26265	1.25304	2.68216	2.73545	2.06707	2.9231	0.569854	2.98487	1.48589	2.66826	2.72315	2.21322	1.91608	0.96915	3.17087	3.40941	0.672138	3.10516	4.15046	2.07733	4.11878	3.02945	2.70849	3.09317	3.94032	3.62501	1.4565	3.65496	3.83231	3.1492	4.56963	3.7165
AIFM3	1.65022	0.704469	0.847071	1.10469	0.391864	0.18669	0.378562	0.884301	1.42145	0.302429	0.598455	0.433775	0.0788388	0.225478	0.106749	0.562207	0.138579	0.664799	0.398812	0.518148	1.6494	0.433718	0.735017	1.53796	1.08453	0.707677	0.116345	0.287725	0.305293	0.395616	0.0452449	1.40794
AIG1	2.61146	4.05027	2.18721	5.27816	3.36455	4.69944	4.14686	3.93545	5.60947	4.39251	1.14707	3.35301	3.13967	4.8626	5.18213	4.52129	2.74264	4.92735	4.64148	1.3114	5.47521	3.2399	4.62276	5.27766	5.19666	5.54993	1.53106	4.2274	4.22705	4.79307	5.58421	4.05438
AIM1	2.19522	0.914671	0.735881	1.72782	2.04215	1.25131	1.89408	1.88867	0.64485	0.599478	1.46165	2.37056	0.734285	0.798772	3.22866	0.926506	0.376673	0.184942	1.43968	0.402889	2.22511	0.968326	1.87444	0.175496	2.18253	1.84298	1.83362	1.54997	1.22679	2.27148	2.68969	2.26695
AIM1L	1.37133	1.29869	2.68962	0.542483	2.15492	2.0916	1.85724	2.64815	2.07698	1.897	2.33108	2.71806	1.49799	0.233474	2.30064	3.25056	0.0714285	2.09525	3.4751	2.10309	3.51807	2.35879	1.76081	2.25563	3.16154	3.51117	1.48233	2.73978	2.6733	3.08502	1.85884	1.6102
AIM2	0.542073	0	0.50107	0.446889	0	1.24001	0	0	0	0	0.936235	0.0208254	0.377414	0.34174	0	0	0	1.4729	0	1.40866	0.403527	2.00203	0	0.0226447	1.09505	1.40644	0.876245	0	0	0.379664	1.50977	0.0211194
AIMP1	5.41417	4.821	4.45727	5.45279	5.16034	4.37949	4.60781	4.62753	4.29305	4.48497	4.23579	4.56564	5.12341	4.81011	5.36575	5.26938	3.91939	4.28209	4.70623	4.72632	5.13019	4.33349	5.04784	4.41555	5.06595	4.96394	4.10674	4.48398	4.55621	5.35255	5.69087	5.72583
AIMP2	5.68318	4.64675	4.39805	5.34447	5.35529	5.14539	4.58648	5.21707	5.63243	4.39158	4.07026	4.82229	4.86994	4.88882	4.91297	5.40211	4.01184	4.79383	5.50602	4.47959	5.05318	4.25547	5.15645	5.62774	5.21524	5.07339	3.37812	5.00678	5.2025	4.69696	4.96345	5.75429
AIP	5.40296	4.78834	5.69526	5.9231	5.86913	5.13593	5.39803	5.7334	5.2946	5.41583	5.68701	5.66692	5.86018	5.96987	6.1392	6.52151	3.75686	5.74688	5.61388	5.23793	5.59472	5.33755	5.46559	5.7693	5.58408	5.7885	4.22603	5.44824	5.53676	5.42724	5.87554	5.07171
AIPL1	0.329415	0.185963	3.47465	1.20709	0.21562	0.402332	0.0700505	0.461349	0.522398	0.228309	1.76033	2.66756	0.962643	0.173961	0.038871	0.456953	0.309017	0.168061	0.148473	0.267613	0.262849	0.305007	0.211404	0.108609	0.188393	0.203769	0.083511	0.0846868	0.0866399	0.296693	0.182791	0.111513
AIRE	0.123984	0.40201	0.793954	0.340318	0.294954	0.310523	0.265412	0.290996	0.370982	3.03224	0.692767	0.712395	1.15179	0.683213	0.0432335	0.455947	0.213264	0.502062	0.130168	0.0466079	0.278912	0.582978	0.186543	0.821403	0.328412	0.20317	0.166199	0.122523	0.0729028	0.204567	0.139718	0.243863
AJAP1	0.00635604	3.79073	2.99904	0.00867265	0.331229	3.02955	2.59304	1.223	2.88099	1.33293	1.53428	4.30682	1.07089	1.36475	0.521362	2.0491	0.152718	2.6856	2.79499	1.24204	5.03271	5.08882	2.49059	1.89744	5.15596	3.57868	1.8702	0.895902	1.78594	0.0139853	0.95467	3.27572
AJUBA	0.256573	5.42845	1.65728	0.252625	0.353019	1.20243	2.82993	2.00997	2.48108	2.86588	0.485189	2.20951	0.716625	1.29026	0.278355	0.592879	0.429875	0.527413	1.05001	2.74363	0.589121	3.31983	0.440461	1.14682	0.870802	0.576323	0.159833	2.18959	1.48951	3.50964	0.571799	1.25135
AK1	3.13201	5.00319	4.72352	3.81779	4.79776	5.26313	4.2615	4.01299	5.35858	5.66098	4.2712	3.78145	4.3571	5.13278	5.20272	4.96504	4.25784	4.72002	5.97272	4.37396	6.09857	4.8255	5.68422	5.89393	6.1964	5.51026	4.12231	4.30388	4.66079	3.76426	4.85463	6.45252
AK2	7.17021	6.6574	7.28782	6.59578	7.20592	6.83487	6.75754	7.09895	7.18858	6.52088	6.80416	7.24544	6.36732	6.02433	7.06221	7.17633	5.76735	6.29722	6.98407	6.2369	6.77852	7.16503	6.41983	7.27184	6.96217	6.63953	6.11615	6.84276	6.84545	6.91349	7.16774	6.74513
AK3	5.54535	5.18435	6.37306	5.50249	6.21049	6.03106	4.21504	5.60559	4.7068	5.58598	5.67221	5.22965	5.97603	5.34246	5.61483	6.44436	2.96031	5.1631	6.22779	5.75762	6.67677	5.85691	6.34757	5.5442	6.49885	6.20559	5.50522	5.94774	5.74285	6.33545	6.85966	5.04023
AK4	3.88836	4.62442	5.18548	3.99027	3.23142	3.91451	4.83699	2.64575	4.8193	3.5419	3.8291	4.65932	2.20358	2.69284	3.25165	0.961517	2.51736	1.73352	2.66141	1.03787	2.66033	4.65248	1.86414	3.43335	2.59768	2.3442	1.2889	2.73138	1.47148	2.4986	2.43405	2.06482
AK5	1.2873	3.18774	1.12717	2.1869	5.21217	0.696155	6.1801	1.75669	2.12658	3.38433	1.31152	1.1452	0.886683	2.18315	3.81676	2.05557	0.714083	2.0465	1.2964	2.86855	1.382	3.12257	0.987343	0.762582	0.762441	0.442117	1.52221	0.112473	0.0656868	0.834957	4.47295	0.775922
AK6	5.0255	4.8651	4.82578	5.89616	4.57401	5.94317	6.09297	5.2757	4.65733	4.55807	4.54403	5.26256	5.98434	5.57423	5.54701	5.80467	4.0566	4.94575	6.10271	4.92518	6.12761	5.06161	5.29159	4.57625	5.99195	5.86619	4.27879	5.08897	4.53701	5.10214	5.765	5.5342
AK7	1.30225	1.4745	5.30219	2.4854	2.67017	2.26606	0.802214	2.21412	3.41929	2.41556	3.98403	4.75453	2.116	0.872303	2.12189	3.09458	1.64183	2.10578	2.5875	2.34792	2.62264	2.86695	2.18814	3.17089	2.93561	2.10271	1.27646	2.3744	2.89028	1.30351	2.9288	1.95561
AK8	0.0214984	0.832493	2.11082	0.413095	0.460011	0.495079	0.314947	1.5129	2.11222	0.685764	0.492163	0.775686	0.334875	0.671985	1.14004	2.8267	1.10387	1.52862	0.865489	0.691483	1.41625	0.917292	1.34708	1.4852	1.33746	0.758988	0.0302198	0.744308	0.977686	1.37538	0.933903	1.66259
AK9	3.9703	2.96961	3.86276	3.32433	2.7742	4.02705	2.50334	3.09503	4.46504	3.09494	3.37236	3.57773	3.80626	2.60539	3.57539	4.28041	2.03067	3.05645	4.09507	3.82913	3.86925	3.6879	4.57918	3.7743	3.89286	3.78031	2.67704	3.84965	4.07046	3.82038	4.33915	4.28563
AKAP1	5.79479	5.1026	5.93257	5.8631	6.4253	7.09786	4.95418	5.58271	5.24083	5.23075	5.78494	5.50929	6.36212	5.91003	6.43501	5.43363	4.15473	4.55658	6.84231	6.06842	6.42607	5.16744	6.57929	5.14232	6.22867	6.14454	4.74146	6.52992	6.95864	5.92643	7.24483	6.14058
AKAP10	2.74159	3.53085	4.73809	3.52785	3.98752	3.49766	2.60543	3.03797	3.15792	3.57512	3.79982	3.71799	3.56827	5.13872	3.73118	3.56416	2.48835	3.3493	3.16671	3.54586	3.05441	3.97752	3.16737	2.78234	3.05703	2.4674	2.33773	2.98966	3.14087	2.80402	5.03282	4.19782
AKAP11	4.95338	2.89789	4.56214	4.93245	3.79292	3.75783	3.09456	3.3218	4.38234	3.67776	4.14066	4.50877	3.24515	3.35445	3.48735	4.26733	3.03951	4.2828	3.82771	2.90194	3.60807	3.46166	3.44332	3.82372	3.39439	3.55192	2.90266	3.53822	3.99027	3.75742	4.8275	3.20169
AKAP12	0.0658181	1.58625	3.08189	2.91788	2.93674	5.1014	4.90813	2.44637	0.0888547	1.6487	3.37623	4.62627	2.8103	4.19952	4.246	4.25714	2.45711	4.82321	4.10397	0.730602	3.30741	1.02075	0.582298	4.34865	3.17602	4.00256	1.07653	3.69957	4.21466	1.46737	5.77827	0.0677551
AKAP13	3.33848	2.93717	3.20864	3.37023	4.38506	3.00281	2.46474	3.64581	2.70811	3.98969	3.33172	2.88485	2.59766	4.27476	3.1451	3.14396	1.16265	4.43041	4.18531	4.16554	4.85435	4.40526	2.70591	4.14134	4.59933	4.49622	2.33715	3.59359	4.03852	5.03725	3.82232	2.81729
AKAP2	2.52431	1.94798	3.04431	0.277598	1.33724	0.8336	3.52299	1.46057	2.74296	3.42615	3.65905	1.02358	1.68916	3.68778	4.82178	1.81551	0.962865	4.08215	4.69981	0.83086	4.30726	2.84248	3.61928	4.50092	4.38013	4.34462	1.60964	3.70813	4.41734	3.95724	5.12047	4.55293
AKAP3	0.0489582	0.294705	0.994273	0.414374	0.481348	0.10529	0.0874907	0.80464	0.28669	0.646517	0.287804	0.477485	0.346848	0.237833	0.223442	1.22489	0.026541	1.14216	0.633363	0.104371	0.409691	0.645435	0.0533821	0.678873	0.219614	0.221413	0.290013	0.193915	0.124654	0.853984	0.189789	0.270979
AKAP5	1.25298	2.7063	3.40812	2.65455	2.91804	2.84377	3.16421	1.74985	3.61082	4.07196	2.5208	3.79948	4.109	3.14658	2.14205	3.33738	1.47351	3.04383	2.35771	3.10693	2.49761	3.59667	2.47782	2.90214	1.87869	2.78582	1.60777	2.60838	2.55259	2.94393	3.56699	1.0926
AKAP6	1.67264	1.52475	2.67949	2.52539	2.29663	1.5072	1.73124	0.604058	3.13294	1.76097	2.48189	1.86642	1.47991	1.7251	0.173488	1.34448	1.58327	2.38342	0.192027	0.798618	0.484034	1.08913	0.165414	0.468763	0.765219	1.05209	1.40024	1.04761	0.947082	0.461326	1.15082	0.886054
AKAP7	0.0268957	1.71994	0.0313471	0.383039	1.37853	0	2.08293	0.946202	1.30536	0.0214897	0	0	0	1.83694	0.482769	0	0.233283	0.242356	2.60379	0	2.93195	1.1087	0	0.340999	2.77431	2.85637	0.0154465	1.81958	0.797395	0.0213056	1.21614	1.2091
AKAP8	3.85958	4.58633	4.39715	4.01276	4.21334	3.45549	3.8917	4.06556	4.29836	4.79852	4.01639	4.68012	4.49205	4.11014	3.99708	4.45105	2.72291	4.1258	4.57517	3.9125	4.52598	4.37097	3.9458	4.10707	4.61947	4.74531	3.07563	4.16185	4.23892	4.37114	4.58814	3.83741
AKAP8L	4.82822	6.44157	5.59679	4.87352	5.54498	4.93854	5.06651	5.5556	5.45203	6.18249	5.53593	5.89881	6.18754	5.51042	5.75756	6.07126	4.25576	5.50702	5.57981	5.28034	5.69702	5.64033	5.40006	5.19132	5.81283	5.89603	4.57995	5.42844	5.3177	6.12126	5.64948	4.78911
AKAP9	3.85792	3.54553	3.89002	4.04266	4.73323	4.56876	3.00158	3.58365	4.44671	3.06591	3.77859	3.64213	3.92731	3.41062	2.86707	4.07031	2.78937	3.66846	4.57824	3.53045	4.31361	3.96939	4.32996	4.11619	4.15689	3.72944	2.52981	3.94409	4.36798	3.94838	4.43086	4.39371
AKIP1	4.8226	3.69075	4.53909	4.94708	4.53099	4.50526	4.58142	3.89757	5.72618	4.61018	4.40809	4.05005	4.50473	4.33832	4.94779	4.94294	3.34329	4.03048	5.14638	4.56306	4.94971	3.80559	5.01737	5.08416	4.55134	4.58385	3.74033	4.86416	4.97289	4.7656	5.3984	4.76078
AKIRIN1	6.1379	5.72259	6.42466	4.99952	6.00114	5.7254	5.23284	6.30604	5.83357	5.15683	8.79174	6.47642	4.93781	4.949	5.56424	6.48309	9.02721	5.11353	5.52581	5.15007	5.55403	5.74816	5.66056	5.27473	5.35281	4.97522	4.30742	5.54554	5.69432	5.04522	5.82369	5.98475
AKIRIN2	5.4485	5.57527	5.90645	5.03326	5.44258	5.79	5.71627	5.3094	6.44072	5.80183	5.74631	6.30885	6.00552	6.49184	6.06033	6.37195	4.45801	5.41084	5.63436	5.15366	5.51647	5.31118	5.97219	6.09525	5.29983	5.34645	4.69397	5.65644	5.72177	5.47669	6.64613	5.70565
AKNA	2.03089	3.96993	2.91249	2.65263	3.85814	2.67851	1.41942	3.31808	3.85177	2.90907	3.40208	2.92183	2.73971	3.38344	2.09174	3.22301	0.952487	3.46562	3.7195	3.47521	3.3534	3.18338	2.23505	3.1769	3.7594	2.68676	1.59413	3.22495	3.31961	3.26445	3.38127	3.39301
AKNAD1	0.275988	3.71671	3.10968	0.113882	0	0.0652319	1.74642	0.0625105	5.62941	0.414926	0.714873	4.78112	0.185222	2.63514	0.0771471	0.129256	5.09033	0.18494	0.186103	0.00775544	0.329493	0.182849	0.389654	0.278046	0.252441	0.351393	0.0517222	0.290362	0.286687	0.0364755	0.0365677	0.082169
AKR1A1	7.38224	6.73014	7.91266	5.5617	6.71623	6.97653	5.8185	6.70042	7.09115	7.24188	6.11854	7.98817	6.01822	5.92018	6.90755	7.42532	4.74451	6.88492	7.21218	7.20492	6.29032	7.35585	6.20952	7.92677	6.20485	5.81507	5.80869	7.22241	7.2892	5.80197	6.74147	7.18117
AKR1B1	7.20815	7.09438	5.95526	6.77262	7.03696	5.18483	5.45053	5.73058	6.47646	6.46236	5.31463	5.79473	6.22879	7.17556	5.69776	6.56095	5.48592	7.18906	4.56931	5.63086	5.75792	0.395916	4.79196	3.69349	5.46525	5.76057	3.6661	6.45303	6.35164	5.16536	5.41044	2.93173
AKR1B10	2.31797	4.64459	0.143527	2.79284	0.101992	0.564586	0.0926056	3.51543	6.22755	0.957358	0.112668	0.331145	0.66854	1.43831	0.0876277	0.0664435	1.19726	0.871502	0.00218153	0.120195	0.161484	1.60961	0.201281	0.514901	0.0463487	0.226829	0.0770682	0.652879	0.488514	1.94621	0.141415	0.247746
AKR1B15	0.559949	0.883485	0.497017	0.402629	0.405509	0.467874	0.269884	1.2573	0.884675	0.459289	0.837831	0.552147	0.657261	0.672392	2.05237	1.35384	0.350111	0.377799	1.16605	0.182081	0.971384	0.256018	0.402894	0.387543	1.12644	1.0711	0.39516	0.333266	0.424975	2.34607	2.27012	3.46436
AKR1C1	0.0737045	0.0182848	0.436268	0.232072	1.18406	4.79114	0.0170143	1.32461	0.0805983	0.0548243	0.607978	0.269656	3.3463	0.652969	2.83683	0.0264509	0.0178306	1.21038	0.988039	0.10413	0.398437	0.15128	0.228871	1.1754	1.01201	0.716968	1.53705	0.440518	0.421638	0.36562	3.39492	1.91406
AKR1C3	1.34652	0	0.24505	0.208681	1.61872	1.10639	0.0413453	3.62793	4.23815	0	0.973587	0.447294	4.90449	0.250957	5.47431	0.1396	2.65719	0	0.338924	0.613011	0.53687	0.0850818	0.355925	2.70202	0.561618	0.648988	1.24469	0.131473	0.259572	0.721529	7.26844	1.90847
AKR1C4	0.0444643	0	0.0242439	0.181002	0.0188729	0.0202044	0	0.322608	0.000390167	0.0402113	0.156503	0.0208027	0.129925	0.00163835	0.459956	0	0.00113573	0	0.00252279	0	0.0694819	0.040701	0.164803	0.000258571	0.0498008	0.0321477	0	0	0.00522031	0.200325	1.49014	0.141987
AKR1E2	0.448809	0.0478978	0.633692	0.956643	0.461334	2.01786	0	1.02347	0	0.0568012	0.533398	0.49202	0.36092	1.93424	0.47157	0.181119	0	0	2.62105	0.582022	0.941164	0.595624	0.0298372	0	2.11575	1.46577	0.0408708	1.27771	0.907387	1.46822	0.133921	1.77627
AKR7A2	6.22659	5.6275	6.69497	5.4028	5.7755	6.09166	5.44346	5.56677	6.17876	6.00785	5.79111	6.28274	5.57247	4.7553	5.56207	6.82115	4.23578	6.48104	5.32893	5.70513	5.20403	6.13102	5.70659	6.76588	5.18062	5.29839	5.54499	5.84247	5.99973	6.09358	5.91989	6.0555
AKR7A3	3.14908	1.88197	2.7724	0.88471	1.33503	2.23492	1.14877	2.57313	1.97503	2.27748	1.9737	2.43472	1.58592	0.629147	0.735029	2.62899	0.401035	1.72893	1.77955	1.10077	2.14508	3.52026	2.25099	2.36521	2.48634	1.86209	1.08856	1.68511	2.55747	1.54816	1.22123	4.87644
AKT1	5.6591	7.27702	7.53964	5.5968	6.69556	6.78234	5.6722	7.06552	6.40069	7.16834	6.06843	7.40509	6.90462	5.94697	7.47331	7.67325	4.59182	6.23276	7.27107	7.28199	6.98719	6.94362	7.37627	7.39323	6.80521	7.01175	6.10546	7.38058	6.92668	6.47572	7.25134	6.48994
AKT1S1	5.54453	5.37435	5.68142	5.36356	5.6303	5.64369	5.40599	5.0288	5.19807	5.82082	4.79094	5.78585	5.09078	4.85691	4.14921	5.6607	4.05033	4.96447	5.1571	4.98114	5.3727	4.56859	5.10714	5.44888	5.29298	5.48346	4.97019	5.36095	5.247	5.40336	5.26457	4.79385
AKT2	5.8259	6.31999	5.87509	6.16195	6.23408	6.24901	5.37016	4.94494	6.74867	6.32469	5.49209	6.06495	5.75455	6.32469	6.33034	5.70019	5.35292	5.92578	5.82835	5.51045	5.93992	5.64528	6.46401	5.82251	6.00769	5.9741	5.66404	5.65628	5.8568	6.17008	6.35309	9.44129
AKT3	4.97084	4.87345	5.66339	5.23698	4.69259	3.92227	5.50075	2.71295	4.8741	5.38857	4.8764	4.99571	5.99122	6.09657	5.12477	5.60498	3.99075	5.68244	3.68841	5.25228	4.64385	5.74509	2.76722	6.29819	3.94555	5.10174	5.00335	4.59829	5.13589	2.09507	5.93846	3.61746
AKTIP	3.33225	3.58904	4.66817	4.14399	3.99931	3.21036	2.81631	3.80681	3.35267	4.22393	3.82025	4.53753	4.09998	3.1958	5.04111	5.20905	2.9335	4.14999	3.66464	3.7695	4.13562	4.22641	3.84938	3.96805	4.25586	4.05881	2.41252	3.9449	4.50655	2.0523	5.32098	3.61798
AL022397.1	0.668678	0.630322	0.711349	0.871454	0.879473	0.878634	1.09551	0.277191	0.789516	0.440931	0.560298	0.386745	0.547886	1.1503	0.107807	0.140636	0.537285	0.00344671	0.745476	0.764633	0.83035	0.67605	0.451662	0.5985	0.670769	0.757783	0.641831	1.32103	0.908312	0.0344317	0.590591	0.724384
AL034550.1	0.852729	2.83566	2.58312	2.74846	2.1888	3.33755	0.740429	2.58671	3.05046	2.58618	1.79079	2.13995	2.26931	3.19942	2.79683	2.89298	1.73741	2.97465	2.53734	2.12515	0.820037	1.70204	2.27145	2.36361	0.784981	0.76922	1.23992	2.51017	2.54244	2.41249	3.57845	3.18546
AL049829.1	0.0214719	2.92564	3.04153	1.20579	0.0905551	2.82099	1.88055	1.82415	2.23808	2.1339	1.82771	2.31583	3.90664	2.86935	1.48475	4.19208	0.62643	1.85113	2.35976	2.78288	2.54635	3.93922	1.36507	1.77747	3.32113	3.60659	1.30676	1.10475	1.23027	1.36096	2.24399	0.441518
AL078584.1	2.06636	1.12183	0.650751	1.9606	0.00134115	0.108939	0.286311	0.0203094	2.29836	0.155644	0.183382	0.694107	0.204635	1.36586	0.226565	0.0449205	1.01124	0.0835469	0.304488	0.0647432	0.386564	0.13331	0.0392482	0.00175966	0.217178	0.49724	0.0240159	0.476664	0.475708	1.88948	0.793557	0.690537
AL109923.1	1.84634	1.11229	2.25679	1.59713	1.70799	2.82287	1.82027	1.33773	2.1372	0.690211	2.13612	1.63796	1.55132	1.36665	1.50131	0.749378	0.882919	1.42469	2.36537	1.13905	1.52003	1.09683	1.07221	1.42642	1.36832	1.44449	0.739251	2.3678	1.87498	1.79217	1.60392	1.45341
AL135787.1	0.385368	0.251347	0.457754	0.253902	0.33081	0.54205	0.106615	0.286869	0.863422	0.986052	0.230984	0.273616	0.311242	0.149089	0.146707	0.226527	0.134411	0.187856	0.438612	0.194706	0.492182	0.394108	0.14902	0.241375	0.36079	0.391058	0.0490798	0.424849	0.374722	0.161781	0.973726	1.88302
AL356053.1	0.353387	0.347016	0.860941	0.263551	0.437236	0.226744	0.391825	0.705891	0.507437	0.700969	0.640217	0.362481	0.156965	0.208326	0.339409	0.898376	0.0560849	0.602173	1.17591	0.119542	1.25925	1.09623	0.459634	0.175542	1.45166	1.04973	0.86453	0.739873	0.731699	1.15072	0.797111	0.474856
AL356585.1	0.00133407	0.000931279	0.530683	9.48834e-06	0.222337	0.00135357	1.38059	0.000997042	0.00700108	0.00111581	0.803532	0.0325812	0.0024487	0.000539439	0.00091372	0.00391614	0.00345158	0.0214422	0.0403817	0.00214392	0.00200155	0.0382316	0.000390596	0.00126534	0.003299	0.0025688	0.000701049	0.0352693	0.00195735	0.00122711	3.62836e-05	1.30866
AL358113.1	0.564469	0.687006	1.7494	1.34486	1.32375	2.59353	0.759637	1.37142	1.37116	1.1677	1.93343	0.913418	2.60311	0.759843	1.28556	0.377857	0.663999	1.31153	1.93716	1.78165	1.49796	0.834906	2.15828	1.80366	1.35362	1.05599	0.893587	0.806717	1.8045	1.3664	2.40301	1.00328
AL358852.1	0.691623	1.25536	0.717675	1.46858	0.281361	0.426518	0.217232	0.554851	0.557873	1.19051	0.837579	0.37246	0.399303	0.207121	0.615408	1.13373	0.437088	0.742028	0.527706	0.725577	0.571853	0.786205	0.591063	0.589977	0.890231	1.47977	0.729298	0.697724	0.512905	0.98557	0.342643	0.501
AL365181.1	1.54984	1.0691	2.23633	1.80456	2.22861	1.18382	2.12762	1.3749	1.68595	1.39838	1.53389	2.04263	1.29283	1.94766	1.01841	1.91577	1.21665	1.08092	1.94378	1.84295	2.20213	2.36093	1.07454	1.32766	2.16864	1.58814	1.70676	1.15141	1.17778	1.42506	2.13243	2.33979
AL513122.1	0.962994	1.30117	0.869815	1.2478	1.19095	2.20793	0.560143	2.75488	2.42085	1.88487	1.52378	0.42841	1.30027	0.771516	1.79929	1.84398	0.467296	2.5463	2.8811	0.830469	2.13982	2.07288	3.10397	2.69842	1.61881	2.0408	0.967027	3.15916	2.91353	2.86045	2.60129	3.71134
AL513122.2	1.49981	1.68975	2.71416	2.41951	2.45586	3.00415	1.06137	2.85066	4.69051	3.27425	2.49976	0.783152	2.42203	1.833	4.15729	2.34881	0.38727	4.53394	4.55416	1.09643	4.12422	3.33469	4.90844	4.96419	4.33604	3.68283	2.56656	4.69023	4.62797	4.62692	4.54734	4.69361
AL589743.1	4.14464	1.10169	5.45343	3.52204	2.48712	0.0130432	4.2306	2.58971	0.798109	0.755404	5.84284	2.76804	3.38026	1.61748	0.0105222	0.0413529	0.416035	0.183449	1.62528	0	2.52103	3.57704	0.0246911	1.42258	2.36294	2.82134	3.10814	0.115117	0	0.122775	1.64155	3.24945
ALAD	2.93788	3.9923	4.60158	3.49215	4.24776	4.69695	3.27748	4.39712	3.885	4.23542	4.0365	3.6658	3.912	4.02843	3.67326	3.9162	1.9263	3.53971	4.36504	4.07416	4.04774	4.26207	4.12803	3.96403	3.90598	3.56722	2.50504	3.16048	3.1833	5.2287	4.67968	4.18775
ALAS1	5.07314	4.75311	4.98082	5.0682	4.77429	5.01631	4.60735	4.99188	4.29895	4.93142	4.09674	4.52215	4.28653	4.2334	4.84819	5.26844	2.83985	4.11726	5.32326	4.48508	5.13403	4.80858	4.59196	4.29401	5.02178	5.27859	3.71378	4.18135	4.39142	3.68016	4.97153	4.87587
ALCAM	6.63499	5.29332	8.84003	6.85148	9.5406	6.52954	3.73062	4.15759	2.39364	5.77877	7.29643	8.72135	7.45921	4.75803	4.77152	5.64048	3.48096	6.22896	6.73276	8.66037	7.21831	3.69573	7.3952	5.86658	6.99622	7.1443	8.60978	6.56044	6.75816	5.70894	6.93769	6.69707
ALDH16A1	3.63281	5.06797	4.05396	4.39138	4.13075	4.79459	4.0965	4.33837	4.36937	5.92712	3.62122	4.95606	4.55398	4.57265	4.43586	4.73012	2.60717	4.59645	5.21719	5.41635	5.29771	4.35777	4.1483	5.17937	5.31241	5.2421	3.75544	4.31562	4.20413	4.47504	4.79367	2.72493
ALDH18A1	4.74493	4.99368	4.48549	3.85002	4.58881	4.15484	4.38827	4.57374	5.03584	4.47994	4.48426	4.46132	3.99324	5.17296	4.23196	3.76918	3.06931	4.60734	4.93601	4.30043	4.6054	4.15753	2.52984	4.25239	4.71018	4.39445	2.98387	4.36976	4.19277	5.10278	4.71861	5.1192
ALDH1A1	7.20616	0.245157	1.54015	7.22219	8.62606	1.21535	0.0758673	4.36961	0.196936	0.231082	6.16368	3.59656	5.76042	0.244789	7.0135	0	0.107761	0.566768	0.0970952	2.96635	0.0704216	0.190203	1.80993	0.440557	0.288621	0.213816	3.68685	2.16871	0.961297	5.26084	8.38735	5.50363
ALDH1A2	0.0254776	0.990769	0.0691455	0.866487	0.0646713	4.073	0.0170356	2.34299	0	0.470744	0.0456766	0.0200329	0.342536	2.38202	0.0350779	0.425829	0.118266	0.0447673	0.85862	0.0403284	1.45465	1.32876	0.0319835	0.0214219	1.18471	0.360084	0.0944192	1.84566	0.810224	0.0195591	0	1.47183
ALDH1A3	1.94693	3.6676	1.46861	0.0281983	0	2.24684	1.63649	1.21644	3.3659	2.3482	0.615257	0.126976	0.0162014	0.625364	0.0255276	0.118853	0.352572	3.08543	0.169813	0.170577	0.313426	3.29539	0.0442171	2.3309	0.0313819	0.0574946	0.594375	0.0364222	0.0190113	5.46742	0.031638	0.247759
ALDH1B1	4.84416	3.10542	4.07184	0.92481	4.84636	3.37815	4.26783	2.51787	3.80108	3.15539	3.63167	3.44545	3.69063	4.5006	4.49779	2.96547	2.33672	2.62662	3.36729	3.74709	3.14869	2.69118	3.04767	4.52754	2.99791	3.30649	2.99727	3.48984	3.60279	2.90926	5.60349	2.2732
ALDH1L1	0.0389434	0.234227	0.632095	0.762163	0.156094	0.250482	0.249091	0.301245	0.61542	0.431894	0.178654	0.111743	0.0154042	0.901878	0.596422	0.203138	0.0776352	0.0558672	0.215573	0.0599707	1.80306	0.504845	1.2197	0.0397368	2.00822	0.755496	0.0253128	0.511665	0.391214	0.230382	0.819617	1.84576
ALDH1L2	1.63302	1.00706	0.631056	0.229558	0.875332	0.509372	2.8871	1.16584	1.52323	0.742379	1.52014	0.492004	1.41271	2.04604	0.0809298	0.291825	1.14311	2.14808	1.4579	0.326624	0.24351	0.855415	0.259578	2.61956	0.350698	0.984293	0.193613	2.0476	2.86997	0.94714	0.199586	0.879896
ALDH2	0.876548	3.08332	3.44113	1.26697	5.09753	1.71543	3.07053	4.66583	2.72802	3.30591	2.87701	3.46223	3.64523	3.77658	3.08082	3.03042	2.11995	2.77665	2.79386	4.77399	1.56268	3.36556	1.85072	4.73657	2.41636	2.93504	2.86072	2.60341	2.64352	2.20579	4.52022	3.9021
ALDH3A1	0.216111	0.882974	1.37196	0.17251	1.09073	1.00034	0.893665	2.17812	0.675505	1.03669	1.03153	0.997082	2.48477	1.99835	1.01434	0.272378	0.141612	1.64037	1.16339	0.787343	1.36609	1.40718	0.0288455	1.35365	1.62581	0.574265	0.264734	2.15609	1.90919	2.16083	1.49741	1.08453
ALDH3A2	3.51223	5.38248	6.12005	3.88194	5.29643	5.90113	3.81406	4.37272	4.4911	5.48569	4.70458	5.46356	5.33534	5.49717	5.59763	4.7738	3.70521	5.40345	5.38496	4.60039	6.36382	5.89728	6.54052	4.95315	6.36861	5.52955	3.43073	5.17113	5.26603	5.22023	5.32141	5.3413
ALDH3B1	2.71596	1.28553	2.39462	2.09285	1.59986	3.2786	0.639598	2.68451	3.1667	1.00597	2.43702	1.21935	1.99539	1.77414	0.720934	1.68544	1.08955	1.3143	1.43625	2.31223	2.34547	1.0275	2.28548	2.61107	2.71693	2.40047	1.29351	1.82	1.85453	1.32894	0.983499	2.57487
ALDH3B2	0.0339983	0.204758	0.269788	2.22753	0.942557	0.532091	0	1.39002	0.0435358	0.367391	0.0179341	0.0293312	1.32435	0	0.511286	0	0.0343249	0.109653	0.0771668	0.0767964	0	0.578297	0.12679	0.0512491	0.0765447	0	0.14114	0	0	5.24116	0.455054	1.05362
ALDH4A1	3.30684	3.75312	4.41457	2.60392	3.31722	1.86319	2.07138	3.11618	4.7195	4.41829	3.20649	4.15983	2.60071	3.4868	1.72566	4.13233	2.55537	3.94096	3.70192	3.7793	3.26186	4.18036	2.91609	3.49111	3.37992	3.44252	1.77593	1.50246	0.467632	4.04552	0.689243	3.00041
ALDH5A1	4.47687	2.8121	2.92597	1.97556	2.70608	3.43987	3.30002	2.16141	3.47088	2.54017	2.36044	2.90344	4.15619	2.81382	1.40279	1.76279	2.23976	2.18728	2.93267	1.61151	3.10984	2.91331	3.01444	4.83571	2.82209	2.76577	3.98666	3.95631	4.11942	3.42739	1.81957	3.44221
ALDH6A1	3.33593	3.36993	5.10967	2.71765	3.47213	3.07278	2.45042	3.18988	3.5047	3.92011	3.52284	4.55519	4.17862	3.57082	1.98184	3.63905	1.34748	2.53052	3.27433	3.73144	3.34526	3.62396	4.18848	3.54314	3.35659	3.1951	1.5583	3.40134	3.86909	2.11429	3.34649	2.56506
ALDH7A1	4.53251	4.78327	4.15871	4.73215	7.13442	5.95723	5.55588	3.96969	4.49572	5.30337	3.77008	4.76185	5.17229	6.20098	4.1751	4.52479	3.45105	5.25042	5.04547	5.60638	5.58304	5.08311	3.80672	0.366585	5.83921	5.78794	3.61682	5.25089	5.10972	4.62703	4.30398	4.98642
ALDH8A1	0.785292	0.169191	1.21125	0.413469	0.988703	0.311941	0.268707	0.469624	0.742365	1.35485	0.941727	1.26654	0.840457	1.06672	0.170438	0.456638	0.750337	0.17103	0.256773	0.309089	0.27336	0.43795	0.722717	0.0616962	0.19989	0.268799	0.687024	0.732546	0.975075	0.591502	0.223848	0.387106
ALDH9A1	5.205	4.62717	6.09592	5.0836	5.66067	5.42674	5.22173	5.17837	5.09049	5.54945	4.81378	5.46012	5.52328	4.85945	5.5792	5.9592	3.45666	5.46104	5.78173	4.83946	5.886	5.43046	5.05617	5.94063	5.80745	5.29561	4.69142	5.78989	6.26143	5.13352	6.36387	5.2528
ALDOA	9.54471	9.93054	9.55931	10.3868	8.92541	10.8456	9.70083	9.31658	8.82936	7.96319	9.16029	9.46039	8.85302	8.57663	9.17545	9.18245	8.03054	8.453	9.26475	8.36136	8.98766	8.50907	9.9518	8.31963	8.88753	9.43049	9.24681	8.31422	8.50571	9.84116	9.16184	10.4227
ALDOB	0	0.535023	0.353722	0.0145159	0.407049	0.231062	0.0759416	0.28475	0.482956	1.66459	0.226219	0.0329466	0.045629	0.165541	0.213034	0.11548	0.333682	0.186365	0.503264	0.425286	0.8481	4.04788	0.145417	1.32862	0.547593	0.269501	0.0146071	2.1273	0.459196	0.0426126	0.180471	0.262031
ALDOC	5.67789	1.69003	6.6718	4.93095	5.66923	1.47552	5.59306	5.1508	5.30212	4.39088	5.53022	4.68732	5.7141	4.31064	1.86059	4.65807	2.59241	5.9024	6.37624	4.00857	1.1593	6.53021	5.41691	4.5052	3.37746	3.30157	4.14239	5.07873	5.69192	4.49007	2.29428	6.06872
ALG1	4.34227	3.50421	3.99932	4.16094	3.57112	3.62084	3.68372	4.62695	3.46262	3.79067	3.86	4.22241	3.92328	3.29169	3.46103	4.70057	2.79264	3.7382	4.38344	3.75066	4.36332	3.67585	4.5356	4.1152	4.1916	4.60672	4.01001	3.54336	4.0853	3.26943	3.89535	4.58557
ALG10	2.38826	2.02465	2.92415	2.86675	3.58593	3.20061	3.0436	1.99364	2.9473	2.37751	2.75291	2.73316	2.41824	3.11699	2.99592	2.00697	0.96021	2.93492	2.50668	3.67066	2.80556	1.90933	1.15404	2.82332	2.57328	2.61534	2.44699	2.66411	2.61051	3.26662	3.59222	2.93485
ALG10B	1.1712	2.12874	2.05575	2.27759	2.37715	2.15406	2.41571	2.1265	1.96685	2.74731	1.84052	2.10428	2.04488	3.48893	2.02967	1.59283	0.85681	1.99402	3.0578	2.41239	3.35314	2.01259	1.99187	2.95265	3.18567	2.20409	2.50814	2.31228	2.41159	3.47473	2.74696	2.93568
ALG11	3.69357	3.0489	4.06306	4.07664	3.10033	3.16334	3.05596	2.97233	4.45313	3.22974	3.78092	4.40523	3.15946	3.33497	3.41304	3.83253	3.24582	3.49689	3.18608	2.75607	3.47797	3.05349	3.61917	3.40278	3.27624	3.29264	3.04519	3.23711	3.79672	3.68601	4.50943	3.18184
ALG12	2.89487	3.33698	3.67764	3.15746	3.55214	3.77995	3.24957	2.77234	3.89308	3.11597	3.33914	3.52882	3.33629	3.16744	2.62109	3.31108	2.13569	2.93145	2.73297	2.57831	3.04211	2.94035	2.6674	2.33827	2.76929	3.15683	2.24073	2.4556	2.76106	2.81334	3.05545	3.39538
ALG13	5.72939	5.03419	5.43381	6.62082	5.83835	5.08162	4.85493	4.20382	5.04502	5.03395	4.92027	5.46844	4.96046	4.72777	4.88729	3.93106	3.36087	4.85315	5.7763	4.93956	5.89188	4.26595	4.68595	5.29681	5.85571	5.57913	4.54991	5.38783	5.6231	5.14365	5.39338	5.07896
ALG14	1.6964	1.25201	1.86209	1.57673	2.15153	1.64407	1.49717	1.43949	1.43094	1.67067	1.84983	2.10786	1.53832	1.49966	1.34672	1.77687	0.497486	1.53438	1.81774	1.91093	1.74219	1.67468	1.38364	1.86336	1.74056	1.56082	1.43411	1.78893	1.89973	1.26314	2.00286	1.2629
ALG1L	2.66418	1.08925	3.21586	3.54131	5.33819	1.29748	1.54413	2.60883	3.05375	2.55664	4.11439	1.74576	3.78383	2.44529	4.61393	1.18679	0.373071	0.153402	4.28789	4.11705	4.68798	4.41717	4.87911	4.25415	5.41382	2.59807	3.22341	1.85866	2.90847	5.21101	6.12219	4.22512
ALG1L2	0.129791	0.183668	0.269641	0.749047	0.474482	0.441532	0.0939417	0.394681	0.00164422	0.187434	0.237999	0.109712	0.0313814	0.407252	0.311324	0.354966	0.0958999	0.19739	0.108101	0.205437	0.594958	0.251041	0.321091	0.196262	0.860773	0.561637	0.266208	0.227864	0.357344	0.31543	1.31256	0.718842
ALG2	5.32903	5.55072	5.52742	5.45593	5.49354	4.94782	3.99585	4.5745	6.54848	6.02389	5.82995	4.81185	5.56387	4.79077	4.59596	5.1615	4.32742	5.46857	4.89762	5.1174	4.83588	6.02694	4.17219	6.19193	4.46293	4.47415	4.22225	4.51296	5.74625	4.99047	4.99372	6.2286
ALG3	5.80094	4.93619	5.46284	5.5645	5.76641	5.3258	5.14924	5.61416	5.10987	4.59442	4.88626	5.53555	4.8826	5.04741	4.48986	5.62557	3.79581	3.68212	4.8688	4.62485	4.34455	3.82201	4.58551	5.19914	4.3437	4.11941	4.56219	4.49811	4.46282	5.46276	5.12578	5.869
ALG5	5.97192	5.78842	5.50942	6.30664	5.04175	4.86765	4.71263	4.82951	5.25499	4.87313	5.91198	6.18913	5.77011	4.94138	6.04977	5.89771	5.16054	5.06153	4.92934	4.58848	4.76249	5.53118	4.51421	4.89249	4.49613	5.0142	5.00669	4.94556	5.10235	5.64583	6.76777	5.06095
ALG6	3.70449	4.05409	4.93991	4.05914	4.15404	4.6489	4.47451	3.0005	5.06577	3.85418	4.04025	4.75131	3.81005	3.29568	3.80307	4.66667	2.94738	3.50037	4.43046	4.08344	4.35955	4.70268	4.15537	4.37826	4.07622	3.52876	3.34029	4.10739	4.23625	4.28412	4.46352	4.5211
ALG8	5.48631	3.60637	4.65825	4.64399	5.29304	5.23526	5.77655	4.11465	5.43811	4.11754	5.06369	5.08771	4.48771	5.44692	4.11318	4.91928	3.795	4.35591	4.76411	4.70727	4.39829	4.18392	4.18605	5.5777	3.9578	4.10111	3.51448	5.29246	5.17526	4.89407	4.9271	4.78407
ALG9	4.2455	3.92284	4.45949	4.91562	5.22707	4.80638	3.53082	3.44759	4.67631	4.22662	4.25537	4.71212	4.83067	5.12437	5.14578	4.51083	3.41359	4.29805	4.78503	4.53349	4.76827	4.38764	4.42746	5.31289	4.63459	4.86114	4.27624	4.97964	4.6735	4.14366	5.11817	4.55663
ALK	0	3.35174	0	0.503597	0.811363	1.04791	0.0779255	0.406814	2.16468	1.3714	0.0172822	0.00731542	0.0158384	1.77027	0.00285654	0.357076	1.15663	1.90251	0.736799	0.059581	2.54674	1.19252	1.5614	0.931064	3.26833	3.42234	0	1.70409	2.72717	0.788569	0.0299711	0.149436
ALKBH1	3.04923	3.81676	4.39003	2.6222	3.81866	3.15217	2.56938	2.84457	3.50576	4.38534	3.54518	4.74102	4.60587	3.90881	2.9543	2.99164	2.2626	3.29392	3.36956	3.36359	3.3484	4.09674	3.48283	3.76686	3.46056	3.56898	2.41391	3.75038	4.06941	3.00092	2.95286	2.66777
ALKBH2	4.6519	4.18112	4.4223	4.04788	4.68305	4.55736	5.74882	4.03531	4.61507	4.04169	4.35773	4.62334	4.24553	5.98964	4.42465	4.58493	3.71824	4.13695	4.12549	4.68399	4.05431	4.05352	3.29219	4.51335	4.40975	4.35435	3.12257	4.06449	3.71928	5.50152	4.48953	3.79774
ALKBH3	5.12057	3.09894	3.74523	4.52175	4.51154	4.13148	4.1035	4.27984	4.55357	3.61228	3.73803	4.03962	4.51363	4.52284	3.77131	4.51506	2.80055	3.87713	4.24605	4.11907	3.97554	3.46479	3.83372	3.84368	4.09379	4.25055	3.54433	4.23707	4.40241	4.74421	3.55047	3.48511
ALKBH4	3.6334	3.5493	3.24418	3.63604	4.23211	3.68012	3.72837	3.53156	3.83816	3.1515	2.86627	3.17467	3.5503	2.7807	3.16523	4.04099	2.37904	3.28976	3.22077	3.86031	3.37256	3.63717	3.15362	3.6269	3.32181	3.04546	2.92482	3.17817	3.50136	2.68699	3.37632	3.1984
ALKBH5	5.47003	6.33899	6.92917	5.44324	5.98275	5.81823	4.70576	5.16398	6.35729	5.62974	5.81481	6.05682	5.91063	5.34789	5.1093	5.50743	6.03862	5.69342	5.53445	6.1646	5.33042	6.08209	5.27506	6.10194	5.08156	4.2935	4.48942	5.3215	5.42639	5.46399	5.95956	6.86675
ALKBH6	3.57842	4.37332	4.76766	3.8618	4.4527	4.62204	2.72171	3.50717	4.22003	4.96937	3.78476	4.47515	3.74196	3.80146	4.69535	4.47483	2.59196	4.08933	4.09506	3.6887	4.17821	4.09529	3.94774	3.76897	4.09463	4.11958	3.58467	3.85236	3.55367	3.34117	4.50942	5.45211
ALKBH7	5.74593	6.29573	6.30985	6.09458	6.56457	6.12962	4.87932	5.21067	5.96708	6.71277	5.52273	6.4401	6.5575	5.76749	6.7378	6.30823	3.38593	5.78863	5.65244	5.69892	5.93054	5.17963	5.83511	6.65959	6.03106	6.00939	5.54706	5.95644	5.72147	5.31562	5.75453	5.32426
ALKBH8	2.91175	1.37161	2.41384	2.38013	3.21132	2.56436	2.72571	1.85088	2.47215	1.94123	1.96779	2.55775	2.76603	3.50171	2.4877	2.03587	1.8003	2.12394	2.23126	1.80935	2.25907	1.9086	1.51715	3.16501	2.22218	2.55536	1.7273	2.07574	2.37378	2.41223	2.89292	1.71955
ALLC	0.119916	0.305009	0.231663	0.161086	0.81903	0.692559	0.0798024	0.261577	0.214667	0.102198	1.24504	0.0720048	0.498567	0.261549	0.129081	0.241552	0.184411	0.0387239	0.11269	0.108755	0.0344827	0.0988145	0.038078	0.0189381	0.0716895	0.122067	0	0.141638	0.132149	0.251608	0.321793	0.374348
ALMS1	2.51646	3.20083	4.23618	2.50228	3.95577	3.78986	3.16363	3.41715	4.16222	3.43027	3.73579	3.51093	2.91076	4.20225	3.86637	4.77335	2.73028	4.11244	3.83892	3.31857	4.16154	3.29007	4.35434	4.28599	4.08497	3.51675	2.33268	3.73599	4.13837	3.11127	4.29733	3.30276
ALOX12	0.398485	1.1076	1.34155	0.653474	0.607012	0.7119	0.493685	0.835841	0.337997	0.407898	0.733853	1.01555	0.960646	0.658867	0.466069	0.492959	0.182772	0.28888	0.512688	1.08248	1.01549	1.63569	0.81827	0.259217	0.804437	1.25819	0.648316	0.661952	0.796257	0.609903	0.940459	0.968362
ALOX12B	0.0333383	0.0724697	1.17143	0.0224221	0.538048	0.00918626	1.04487	1.03856	0.0943117	0.227684	0.266403	0.735229	0.209504	1.00997	0	0.198387	0.101725	0	0	0.544829	0.0386354	0.181384	0.010128	0.112818	0.0234353	0	0.084992	0.0429066	0	0.503663	0	0.00940317
ALOX5	3.6703	0.703879	4.71922	0.3168	0.0326523	3.72365	0.0190918	3.22557	0.205286	0.200086	2.22711	3.30123	3.63248	0.718342	4.35018	3.28258	0.971234	4.11924	5.1598	4.00064	5.23916	3.8481	5.62205	3.82942	4.7305	4.84677	2.5655	1.37121	0.11441	5.05207	4.65301	3.65411
ALOX5AP	0	0.746099	0.221301	0	0.0305022	1.30103	0.0583719	0.0551274	0.0578083	0.215458	0.132815	0.063542	0	0.231854	0.754589	0.110749	0	1.95517	0.443962	0	0.810361	0	0.0315628	0.800592	0.439819	0.162907	0	0.520976	0.579575	0	0.588488	0.303193
ALPK1	0.457602	0.74275	0.980797	0.92474	0.555586	1.12009	1.91382	1.02927	1.17138	1.23241	1.01824	0.980843	1.2198	0.907497	1.28007	0.824498	0.486813	0.492835	0.730419	0.601797	0.87314	0.94109	1.41565	1.13716	1.86837	0.542175	0.740365	0.954146	0.774791	2.25351	3.16536	1.5637
ALPK3	0.545562	0.439402	0.281472	4.3328	0.294047	0.227103	0.114003	1.75016	0.204811	2.21005	0.264705	0.300489	1.64251	0.661414	2.66029	2.74355	0.0774314	0.960028	3.95625	0.212948	4.24104	1.92704	3.5957	0.346123	4.05126	4.10602	0.30096	0.374576	0.556947	0.716643	3.18953	3.50939
ALPL	0.0176834	2.14228	1.81862	0.292725	2.86077	3.11553	4.53185	0.611615	5.53305	3.17405	0.334536	0.529996	0.299911	2.71912	0.218612	0.996837	0.519552	4.50342	0.936369	0.881476	0.788495	6.46684	0.717819	1.31361	0.810819	0.286446	0.142591	1.59162	2.31179	7.89852	0.1716	1.17396
ALS2	2.87775	3.59834	3.9608	3.62085	3.87911	3.69523	3.63558	3.62977	4.73631	3.72983	3.13951	3.73832	3.36323	4.32784	3.46958	4.07309	3.13197	4.07352	2.89445	3.40684	3.80026	3.2321	3.65705	4.35619	3.79467	3.3975	2.05595	3.24478	4.00984	3.90439	4.26929	3.71989
ALS2CL	0.0404283	1.32184	0.568774	0.462552	0.499137	3.40631	0.275502	3.3638	0.0746591	0.902615	0.192852	0.107104	0.0233845	2.76608	2.32785	3.67208	0.0311368	0.172526	4.34473	0.0457723	5.99362	1.21551	0.622962	0.145635	6.06846	4.505	0.0647425	0.972118	1.02913	1.78179	3.44639	2.29771
ALS2CR11	1.43605	1.36973	1.44305	1.56166	3.2747	0.0538685	1.5159	1.94978	1.46682	0.161913	1.07358	0.962099	0.046927	2.62125	1.2396	2.2907	2.01795	1.34401	1.83661	0.370298	2.74263	2.07827	0.0896984	0.325433	2.72223	2.61151	0	1.53354	2.59313	1.58227	1.54039	0.815883
ALS2CR12	0.415645	0.236476	0.60326	0.241204	0.501387	0.430406	0.467274	0.208226	0.868075	0.414194	0.414792	0.499699	0.152855	1.31045	0.268584	0.282838	0.353987	0.398797	0.419995	0.520103	0.414584	0.545883	0.220424	0.697013	0.486868	0.365586	0.097137	0.39432	0.688116	0.159654	0.152566	0.204001
ALX1	1.87219	1.38295	1.06787	1.93512	0.715119	0.500058	0	1.05492	4.63899	1.71854	0.0207219	0.189088	0.0258185	0.71705	0.675716	0	0.768319	0.0468195	0	1.65752	0.198152	0.0411849	0	0	0.252467	0.0363388	0.10457	0	0	0.0202487	1.28769	0.819326
ALX3	1.0288	4.30126	4.69369	3.12046	4.53421	0.0474175	1.14176	1.47805	3.6467	0.366373	3.88588	4.77832	4.23035	2.96436	3.02579	3.70687	3.12645	0.0859388	0.0997252	5.0332	0.0316962	2.52338	0.0329699	0.0172635	0.00170773	0.00150993	0.0347314	4.07089	3.87078	4.31477	4.7016	3.54014
ALX4	0.963912	0.0573131	0.468586	0.154988	0.302802	4.22556	2.9883	0.380715	0.0200852	0.05095	1.1149	0.133378	0.0524353	0.146628	0.237302	0.804846	0.107622	0.386181	0.534221	0.0531423	1.29833	0.0219025	1.91318	3.73005	0.672978	0.809575	0.438413	1.5573	2.643	0.0164098	0.694113	4.30592
ALYREF	6.39422	7.62356	7.54156	7.01349	7.72643	6.89596	7.78384	6.75738	7.92306	7.97711	6.58542	7.5439	7.56206	8.24165	7.64744	7.15524	6.78852	7.35026	7.1901	7.27118	6.89324	6.93148	7.09059	6.7123	6.83898	7.0681	6.90722	7.62098	8.03502	7.7152	7.28326	6.73333
AMACR	8.08039	4.68598	4.48175	5.52712	3.61639	3.98332	2.67513	3.55793	4.35757	4.55516	3.68621	3.97361	4.03577	3.62337	4.22741	4.54087	2.80978	5.06088	4.2853	3.66238	4.72106	3.66106	8.43687	4.30024	4.61068	4.37288	4.26118	5.48753	5.89281	3.73452	3.93428	5.98082
AMBP	0.0315827	0.388558	0.106103	0.0397468	0.0732382	0.0818463	0.109114	1.68825	0.187627	0.18019	0.148894	0.145619	0	0.335403	0	0.248416	0.298399	0.276504	0.523616	0.0742987	1.03849	0.453836	0.0393747	1.32889	1.80896	0.819507	0.0211535	0.434868	0.288906	0.0374355	0.112764	0.20281
AMBRA1	4.89242	2.9856	4.01477	3.6781	4.36827	3.99878	3.1352	3.77726	4.04786	4.09708	3.79754	3.81349	4.36977	4.20317	3.82372	4.69525	2.63015	3.89299	4.34171	3.25553	4.34987	3.74611	3.97521	4.71447	4.05489	4.24653	3.29526	4.16076	4.34486	3.89963	4.39603	3.34786
AMD1	5.85585	5.67086	6.20273	4.77073	5.19457	5.65452	5.45788	5.78374	6.03198	5.33925	5.63425	6.50015	6.30896	5.74791	6.27971	6.0212	4.26181	5.12265	5.7331	4.99189	5.68398	5.30178	5.1836	5.70388	5.53609	5.65301	4.70503	5.44415	5.08775	6.09689	5.82162	5.35423
AMDHD2	4.6815	3.55528	3.94733	4.08493	3.82825	3.47234	3.78096	3.51187	4.00271	3.28819	3.62455	4.16043	3.49746	3.16031	3.20235	4.40923	3.08141	3.68754	3.95998	4.2094	3.99742	4.22204	4.53591	3.31328	4.07644	4.05044	3.05398	3.33585	3.80423	2.98206	3.7579	4.23785
AMER1	0.775079	2.3602	1.89032	1.74469	2.14017	1.92758	2.6637	1.54138	2.38202	2.20882	1.3204	0.989304	0.336627	3.28433	1.39085	1.41607	1.18751	0.832335	2.94039	1.06818	2.66658	1.55401	1.7179	1.49576	2.69425	2.24039	0.943816	0.010902	0.0433636	2.58012	1.53704	2.02153
AMER2	0.0385935	2.49604	1.73262	2.29156	3.33385	0.182695	0.368282	1.19097	3.67921	1.87074	1.54674	0.864835	2.55392	2.9383	2.0454	2.15115	2.73138	3.10493	1.80754	2.82801	1.57968	1.69034	0.601788	1.17577	1.86056	1.46573	1.60216	0.275542	0.141108	0.0974209	3.65366	0.075552
AMER3	0.0871612	0.490811	2.32949	1.12426	2.16772	2.27192	3.53	0.819428	1.90506	0.109519	1.31593	0.819131	0.132998	2.22922	2.97701	1.66724	1.08772	2.54455	1.90837	1.6691	4.19157	1.80532	6.03553	3.50784	4.45763	2.7665	0.0924018	0.0638912	0.152792	0.420679	1.48612	2.50078
AMFR	3.51573	4.49634	5.09918	5.04665	4.58318	4.54672	3.86063	4.56506	4.95987	4.66248	4.36067	4.71245	4.46959	4.57055	5.49713	5.43975	3.72542	4.88209	5.03009	3.7649	5.81288	4.31632	5.66889	4.67043	5.74289	5.59164	2.96825	5.3796	5.55353	3.76747	5.93743	4.9609
AMH	2.53547	5.63269	3.95094	5.6224	2.83348	4.65882	4.81936	3.57245	2.37633	5.44333	1.52841	4.086	4.22666	6.24291	5.60656	4.17857	3.01123	5.92382	7.31084	7.48993	6.58389	5.50155	4.84531	6.49488	6.70425	6.13428	2.36735	4.32896	4.184	4.96487	7.21924	2.89067
AMHR2	0	0.028641	0	0	0	1.03767	0.01243	0.121829	0.0793528	0.0489496	0.0296366	0.030321	0.0303844	0.0200204	0.259056	0.350752	0.048944	0.0463243	0.0378041	0	0.614665	0.0499601	0.100917	1.25966	0.540027	0.492355	0.0633056	0.239837	0.957103	0.0427619	0.182342	0.589595
AMIGO1	1.10712	3.60307	2.27838	1.49664	2.2306	2.19355	1.65153	1.64067	4.22009	2.95847	1.10735	2.07568	1.59291	4.75404	1.61069	2.94872	2.75021	4.07077	2.16304	2.03461	2.98205	2.0957	2.9122	4.02444	2.85086	2.44769	1.81191	3.38332	3.53009	1.57196	2.50329	1.5077
AMIGO2	2.05488	4.38981	3.458	4.62983	3.21407	2.8834	2.00951	4.37551	0.108374	3.77537	5.5165	0.0115579	6.36451	2.82261	6.41501	5.63058	2.42701	4.17996	6.23481	2.37225	6.60185	4.4364	5.91343	3.03629	6.07764	6.48477	4.57375	4.6326	4.61478	3.25103	6.34789	4.44212
AMIGO3	2.43055	2.19584	1.47792	0.996932	0.535618	0.930403	1.43455	1.23543	1.35715	1.06556	2.07261	1.56516	0.881052	0.597062	0.440049	1.30248	0.274358	1.23345	2.50304	0.66125	1.92697	1.4711	2.53121	0.699426	2.20373	2.56468	0.594166	0.906722	1.03172	2.13841	0.868991	0.765335
AMMECR1	3.28898	2.57833	2.80173	3.11987	2.81592	3.89434	3.24539	2.79757	2.98226	2.49754	1.96419	3.49521	2.58768	2.1485	2.0217	2.11789	1.61893	2.10609	4.00059	2.16844	3.56377	2.26936	2.40746	3.32488	3.52858	3.07728	2.05018	3.80449	3.71582	4.08111	3.3488	2.44953
AMMECR1L	2.69602	3.75468	3.76968	3.61068	3.85553	4.14688	3.96594	3.53563	3.83841	2.52183	3.34996	3.86054	3.63945	4.38797	3.82447	3.60092	1.99335	3.64561	2.90717	3.90973	3.76373	3.05853	3.58377	3.7373	3.77503	3.49659	2.47632	3.06152	3.70337	4.22064	3.97292	3.71542
AMN	0.305162	0.475599	1.56227	0.113355	0.552551	1.20924	2.3815	2.68777	0.222751	0.864533	1.32529	1.93775	1.21671	0.610858	0.439783	0.251343	0	0.84345	0.378695	0.776359	0.332495	1.57779	1.01756	1.39582	0.337098	0.430066	0.0629652	0.720325	0.794798	1.92327	1.15216	0.421546
AMN1	4.29713	3.76618	4.17282	5.17073	5.27264	4.82365	3.65708	2.77485	4.19619	3.95556	4.03926	3.95389	4.72724	4.58719	4.97676	2.9398	3.20713	3.93496	3.57518	4.94931	3.25152	3.49566	4.23464	4.07882	2.81297	3.34554	3.83837	3.61113	3.76299	4.47255	5.40911	3.70987
AMOT	0.959533	3.58256	4.54283	4.59363	3.55712	3.81275	2.24606	2.52992	4.28334	3.2447	3.1838	4.19269	3.66105	3.10405	3.10033	2.79579	2.55744	3.87159	5.39653	3.46614	5.58418	3.35201	3.2476	5.44224	5.61355	5.09137	2.75532	5.6997	5.81979	3.51593	3.02922	1.64111
AMOTL1	4.16738	4.86534	5.53875	5.72334	4.82791	4.69524	5.88644	3.94676	6.25974	5.66094	4.89433	5.4806	5.34037	5.20573	4.20935	5.83883	4.32321	5.69019	5.60284	5.04955	5.29733	5.48511	4.53435	5.54661	4.99538	5.34216	3.59325	5.54166	5.39483	4.71019	5.3405	1.36812
AMOTL2	0.339644	4.2776	1.82373	0.188898	0.866188	2.22056	2.82288	3.20832	1.02334	3.36674	0.803626	1.12204	4.90506	3.50765	1.39117	3.31966	4.23404	2.96488	4.24702	2.50663	4.45468	3.32253	2.25579	3.60256	4.56131	3.60179	3.58682	4.4054	5.46114	3.73138	0.932484	2.87754
AMPD2	6.91872	5.22654	6.57975	5.46392	5.16066	7.15239	3.6937	4.29195	4.31657	4.65884	5.90738	6.06938	4.53061	3.85022	2.0887	4.50841	3.01846	4.30817	2.44859	4.92803	3.60732	3.4847	3.42752	4.47278	3.63693	3.64392	2.88364	3.39423	3.80186	3.78248	3.14454	3.7117
AMPD3	3.6936	2.50146	3.12761	3.05574	3.14822	3.37248	0.622888	2.15487	4.61897	3.02015	3.94323	2.02906	3.28952	3.17044	1.59102	3.46952	2.47798	3.45221	3.02968	2.55215	3.09305	2.57264	2.50839	4.18024	2.77044	3.23274	2.39496	3.6784	3.96378	2.82271	3.10847	4.5489
AMPH	5.62039	1.86054	5.44002	1.50514	5.91045	0.0804198	2.15239	1.94465	5.12872	3.93383	5.44402	4.2724	4.52426	2.80618	0.0868552	3.30044	2.63459	4.12208	3.36009	0.300369	4.50225	3.333	0.863708	3.51034	4.76545	3.82676	2.75651	2.10138	4.15073	0.275877	0.0361959	3.33785
AMT	1.61722	2.59058	2.44902	3.04977	2.08613	2.57885	1.64778	1.90346	3.10604	1.90134	2.10698	1.58745	2.35459	1.93309	1.29919	2.32323	1.20845	3.56614	2.69799	1.93973	2.61535	3.6469	1.72295	1.43541	2.75252	3.04354	1.26444	1.36485	2.27172	2.02665	2.60123	2.10943
AMTN	0	0	0.0884261	0	0	0	0	0	0	0	0.078093	0	0	0	0	0	0	0	0	0	0	0	0	0	0	0	0	0	0	1.70873	0	0
AMY1B	0.0407267	0.0196056	1.10891	0.0186717	0.0376484	6.09979	0.462726	0.0055052	0.0138177	0.278308	0.458503	0.673586	0.368454	0.0154631	0.00711577	0.124961	0.00401557	0.00517249	0.0277313	0.0241563	0.360971	0.154915	1.14298	0.00631235	1.00687	0.504225	0.0631521	0.0140275	0.0578862	0.0320378	0.0248252	0.314637
AMY2B	1.46164	3.42767	3.12562	2.26358	3.55079	4.11752	0.734764	1.47481	0.444605	3.70424	4.10137	2.24683	2.30594	1.78989	1.66972	2.45413	1.09922	0.227616	1.43598	2.81491	3.55143	4.07983	3.32434	0.305215	3.74283	3.08959	1.97751	1.68609	1.45092	1.829	3.70196	2.35043
AMZ2	5.69435	5.87887	6.88601	6.7801	6.74752	6.17765	5.49579	5.5145	6.78473	6.02121	5.83176	6.06639	5.79543	6.97066	5.16961	6.33013	5.78588	5.67709	6.13265	6.35676	6.18568	5.72868	5.9835	5.36984	6.11025	6.10871	5.13045	5.75017	6.1168	6.01909	5.96575	6.32131
ANAPC1	4.28765	3.73018	4.31557	3.53721	4.01891	4.27708	3.97175	4.07333	4.16217	3.3537	3.92514	4.60662	3.78061	4.40604	3.75829	4.08577	3.12733	3.85996	3.07415	3.78539	3.84151	3.1716	3.64944	3.75408	3.85987	3.70158	3.09282	3.8727	4.40184	4.24281	4.43741	3.62807
ANAPC10	4.04718	4.49761	4.11469	4.84385	4.77741	3.76951	4.23723	3.9302	4.01432	3.78191	3.91895	4.08055	4.79746	3.92295	4.83854	5.09307	3.18667	3.47095	3.76247	4.4329	4.51184	3.89835	4.29916	3.98744	4.2015	4.36667	3.674	3.78326	3.81607	4.93969	4.9315	4.13206
ANAPC11	7.40645	7.7256	8.01349	8.66624	8.43824	7.90104	6.57852	6.60063	8.09511	8.22887	6.87473	7.73494	8.14491	8.36314	8.25775	6.90704	6.65023	7.47728	7.65159	7.80213	7.49674	7.21571	7.53268	7.01471	7.41153	7.62766	8.14734	8.47083	8.91743	7.81997	8.17229	8.39659
ANAPC13	5.95926	5.38642	5.95959	6.13009	6.39502	5.83469	5.87651	5.85068	6.28422	5.33051	4.76536	5.23454	5.97084	6.30324	5.08016	6.01607	4.57696	5.08023	5.82782	5.99807	5.46607	5.24369	6.09805	5.89392	5.73053	5.69164	5.90302	5.35807	5.69733	5.98936	5.4485	6.11478
ANAPC15	5.67393	5.06223	5.58267	5.92441	6.28572	4.91544	4.57481	5.39789	5.30852	5.64677	5.47446	5.78964	5.66389	6.19367	6.08767	6.14574	4.66796	5.65918	5.83427	5.86321	5.7686	4.99303	5.37346	5.25234	5.81075	5.83693	4.45389	5.85903	5.60022	6.07897	5.74988	5.87888
ANAPC16	5.06086	5.04772	4.72319	5.36914	4.69777	5.55903	3.332	4.45764	4.67701	4.54658	4.31692	4.26842	5.4711	3.9066	5.16267	5.39996	2.91871	5.12979	5.24405	5.21793	5.33319	4.79115	4.31718	5.07613	5.36768	5.05102	4.30844	4.84749	5.07837	5.0962	5.72777	4.97068
ANAPC2	3.96897	4.71996	5.3658	4.11778	4.95348	4.64553	4.08567	5.06174	5.0647	5.00793	4.48307	4.75989	4.69093	4.84557	4.05005	5.63758	3.53228	4.21483	5.15296	5.00922	5.01335	5.08564	4.57757	4.83864	5.0861	4.77677	3.87468	3.76383	3.96764	4.86918	4.53616	5.48132
ANAPC4	3.80055	4.36939	4.09331	4.43247	3.89633	3.97842	4.28099	3.63709	3.97079	3.86844	3.62918	4.36463	4.28314	3.78266	3.90466	4.43029	2.75006	3.50701	3.90485	4.14043	4.67533	3.98638	3.63014	4.0269	4.46382	4.69643	3.35254	4.16873	4.40524	4.63491	4.45604	3.9792
ANAPC5	6.87645	6.8089	6.82511	6.04506	6.90085	6.63857	6.69076	6.25219	7.07262	6.77058	6.45523	6.86645	6.24314	6.87919	6.14321	6.74306	5.36666	7.07122	6.73209	6.50245	6.31398	6.35434	6.27596	6.52232	6.34221	6.21118	6.04912	6.33569	6.4496	6.70944	6.61784	5.97785
ANAPC7	5.71696	5.58976	5.44296	5.01975	5.73271	5.37042	5.12697	5.61801	6.16646	5.60281	5.20438	5.79427	4.86417	6.00823	4.97539	5.47853	4.78337	5.58417	5.543	5.28497	5.46957	5.12536	5.08807	5.68959	5.34128	5.13713	4.19307	4.88106	5.02951	5.56127	5.74908	5.5831
ANG	0.177746	0.216982	0.229347	0.268101	0.0310951	0.0316142	2.58381	2.35948	0	0.0700193	0.0312037	0.559763	0.287817	0.937163	0	0	0	0.0141476	0	0.0934933	1.75292	0.50951	0	0	2.73758	0.855019	0.186688	0	0	0.597313	0	1.49207
ANGEL1	3.85441	3.98647	5.33769	3.50188	3.85275	4.35317	3.59467	3.60499	4.38516	4.57273	4.58547	5.43756	4.81466	3.21363	2.27201	3.55827	2.36336	3.02923	4.14259	3.33348	4.28124	5.21948	3.35882	5.35076	4.43583	3.9844	3.14337	4.34806	4.70358	3.79902	3.7796	3.58324
ANGEL2	3.8043	3.78108	3.91906	4.00714	4.02459	4.035	4.11089	3.05559	4.14696	3.93734	2.95048	3.6162	3.23822	4.39073	3.90846	4.04168	3.04343	3.78592	4.88719	4.06257	4.92086	4.38538	3.83094	4.23106	5.07922	4.60807	3.23559	4.2345	4.19842	3.83551	4.46599	3.84269
ANGPT2	0.215094	0.478832	1.36582	1.01851	0.684347	1.23715	0.37023	1.68383	0.459954	0.620772	1.52065	1.45194	0.778543	0.645881	2.746	2.96166	0.292112	1.78434	1.573	2.70962	0.585999	0.534043	3.64826	1.26016	0.857537	1.62742	1.45988	1.95196	3.25078	0.310368	3.26153	0.34784
ANGPT4	0.269935	0.210812	0.20279	0.197018	0.123227	0.423923	0.108571	0.302764	0.370183	0.758876	0.161094	0.189601	0.16001	0.371249	0.460853	0.297309	0.0360837	0.429663	0.31761	0.0717836	0.375837	0.562561	0.279506	0.234909	0.477534	0.453026	0.132437	0.550805	0.632327	0.26534	2.04644	0.302915
ANGPTL2	0.481883	2.69513	0.446384	0.403501	1.3676	1.98535	4.02133	1.82229	1.74842	3.72414	0.534559	0.0654472	0.529544	4.14594	1.64497	1.0172	0.94171	3.19	2.94592	0.513826	4.93309	2.20267	3.7007	3.38142	4.11992	4.91654	0.145697	3.48909	3.64631	0.518975	0.721564	0.72083
ANGPTL4	0.121229	3.5673	1.12159	0.859798	0.181122	3.63688	1.33333	2.66826	1.26985	1.04577	1.20967	1.89059	0.490167	0.759446	3.4378	0.31754	0.152878	1.17582	0.683547	0.674795	0.743282	2.81432	2.3302	1.13039	0.811978	0.794168	0.413509	2.28218	1.27802	2.74258	2.4994	1.5934
ANGPTL6	0.712878	0.727076	0.6507	0.638193	0.232491	0.48149	0.393073	0.635433	1.09516	0.653869	0.338812	0.565586	0.318799	0.0761557	0.525208	0.423357	0	0.154733	0.382812	0.184924	0.382849	0.421596	0.0826959	0.544654	0.543096	0.280625	0.712761	0.337407	0.533618	0.372438	0.623488	0.164177
ANGPTL7	0.039705	0.100166	0.0474008	0.0110935	0.0527057	0.0737782	0.122965	0.723318	1.78691	0.093991	0.0364606	0.0589475	0.155158	0.0798955	0.297869	2.28614	0	0.463056	0.218232	0.0659654	3.94653	0.189271	0.555759	0.0857148	0.333447	0.205358	0.0135456	0.854272	1.41608	0.0678747	0.0335571	0.0113648
ANK1	2.36025	4.9178	3.42336	4.16992	1.32797	3.32297	1.67318	2.57072	4.76612	4.62786	3.79067	3.06874	3.0419	5.19836	3.52971	3.23986	2.85662	4.92968	2.9935	2.28459	3.19621	0.503467	4.03292	2.82328	2.33861	3.17347	1.9964	2.89077	3.92361	3.56452	4.48636	3.4951
ANK2	3.98633	2.77296	4.50836	3.65762	3.27008	2.98834	3.98617	0.455668	2.34398	1.41281	4.33855	4.79516	3.61117	5.38705	4.50938	0.481356	1.09202	2.53239	4.97494	2.58589	5.96649	0.0543417	6.23727	2.89988	5.58396	6.28921	3.41532	4.51944	5.07727	1.38791	3.67505	6.99709
ANK3	4.59268	2.14194	2.86376	4.02755	3.94109	2.76062	0.724243	3.12183	2.86105	1.76989	1.67057	1.46849	4.10128	1.69287	2.36562	3.12666	1.19886	3.04016	2.79762	2.50407	3.11955	2.3909	0.723644	1.0628	2.7932	2.89673	2.61576	2.34126	2.69496	5.10575	3.79466	1.63578
ANKAR	0.670302	0.730775	1.28598	0.857313	1.33327	1.42875	0.827867	0.929568	1.65346	0.813057	0.970065	0.943803	1.31831	1.09664	0.673526	0.521939	0.5354	0.77264	0.850855	0.842119	1.09332	0.946465	1.05728	1.08534	1.35618	0.984684	0.554331	0.839816	1.07655	1.36734	1.57087	1.239
ANKDD1A	0.849187	1.69166	2.07599	1.56747	2.64387	2.4808	3.48587	2.19958	2.02657	1.9088	2.22143	2.51097	1.66059	3.69024	1.66399	3.42505	1.2656	2.96103	1.62769	1.73772	2.46856	3.30079	1.44052	2.45801	2.47695	2.29491	0.557349	2.09855	2.59749	3.18764	2.93318	1.04007
ANKDD1B	0.483808	0.554066	1.05311	0.417178	0.161239	0.7425	0.22957	0.023475	0.731805	0.12537	0.748718	0.319805	0.765641	0.173941	0.976824	0.136125	0.215133	0	0.287063	0.101414	0.219344	0.183823	0.814582	0.25385	0.28458	0.191489	0.527741	0.353242	0.243084	0.111366	0.745468	0.695142
ANKEF1	3.97861	3.66711	5.28695	4.02762	3.72143	3.8459	1.85223	2.82635	4.98081	3.45845	4.39415	4.76004	2.43026	2.21773	2.50205	3.68342	3.35574	3.78468	3.48725	2.66134	3.19215	3.07727	3.36365	3.83512	2.97818	2.79335	2.66964	3.45428	3.48182	3.65996	3.23032	2.99527
ANKFN1	0.234086	0.551002	0.0441142	0.0303671	0.168123	0.168831	0.0534501	0.358076	3.26839	0.0628741	0	0	0	4.83144	0.00655062	0.350132	3.22636	0.983082	0.504958	0	0.14762	0.18707	1.71787	2.59893	0.0908005	0.811025	0.0146983	2.89985	3.23331	0.14147	0	0.330336
ANKFY1	2.93872	4.30711	5.45521	3.76695	4.78352	4.42729	3.38526	3.32626	3.82242	4.59625	4.26305	4.84865	4.30225	3.44432	3.65824	3.86231	3.1402	4.66251	4.13576	4.31161	4.12541	5.07559	4.12818	3.62666	3.82923	3.8122	2.69299	3.73843	3.99663	3.80214	4.51909	3.65432
ANKH	5.6314	4.90733	4.63503	4.45564	5.09536	3.60472	4.51676	3.04154	4.61287	5.02601	4.79684	3.85513	4.56817	5.10947	3.3176	3.81033	2.73724	6.087	3.90957	3.42666	5.10246	5.11194	3.95967	4.58025	4.71149	4.59951	2.28043	4.66323	4.49045	3.68199	4.18978	4.36155
ANKHD1	4.23792	4.58909	4.61795	4.89353	4.57348	5.6756	4.78829	4.63959	4.47842	4.64942	4.18493	4.15098	5.05328	5.23788	5.16277	5.36213	3.23927	5.22049	5.60259	4.96588	5.9507	4.98287	5.2186	4.73204	5.88973	5.49806	2.86955	4.69894	4.78367	4.5613	5.50843	5.10574
ANKHD1-EIF4EBP3	1.96645	2.76181	2.81912	2.98642	2.32293	3.53508	2.00302	2.01714	2.89622	2.80067	2.3211	1.7864	1.84018	2.92605	2.27785	2.29657	2.70768	2.71239	2.89777	2.88719	3.85496	2.41212	2.87642	2.11837	3.70354	3.49139	1.71836	1.98861	2.34041	1.6457	1.89864	2.08029
ANKIB1	3.9007	3.78827	4.11372	4.93318	4.93255	5.27358	4.04936	4.06557	4.18189	3.48707	3.38124	3.64416	4.05485	2.84469	3.81254	4.52203	2.46555	4.19255	5.02178	4.29822	4.92226	4.20071	5.31829	4.61091	4.78992	4.57149	3.72816	5.0973	5.49006	3.93886	4.73213	5.44286
ANKK1	0.264809	0.0233895	0.0816478	0.35303	0.333229	0.937436	0.0260698	0.138709	0.316939	0.303934	0.521916	0.0512046	0.0757843	0.409687	0.087932	0.342014	0.280235	0.319519	0.28521	0.0216384	0.672215	0.324436	0.572571	0.521787	0.390434	0.251165	0.271325	0.468432	0.65673	1.40396	0.0794527	0.46437
ANKLE1	2.14949	2.04463	1.3832	0.960682	1.4202	1.47538	3.52589	1.10605	1.10204	1.45659	1.49397	2.1316	1.74652	2.12812	1.01133	1.44322	0.621556	1.62494	1.17403	0.938807	1.09764	1.86674	1.05747	1.13493	1.40282	1.3229	0.744293	1.02077	1.30214	1.33839	1.16857	0.692331
ANKLE2	4.61606	5.66466	5.68574	5.32125	6.5601	5.47057	4.88034	5.44997	5.85508	5.83522	5.391	5.86777	5.29346	6.14142	5.01651	5.85348	4.17448	5.71367	5.72371	5.3516	5.62266	5.69716	5.15374	5.37989	5.40903	5.18703	4.2249	4.99935	5.31301	5.63566	6.07877	5.89411
ANKMY1	1.04125	2.97946	3.08643	2.91724	2.13462	4.09325	3.02817	3.15996	3.49271	3.34742	2.12997	2.97247	2.73041	3.17711	2.60816	3.50817	1.93632	2.76937	3.12222	3.01409	3.94443	3.50627	3.88367	2.81074	4.08585	3.88042	2.20388	2.39059	3.06482	2.48062	3.3693	2.93459
ANKMY2	3.22518	2.48581	3.23966	3.26686	4.55927	3.63359	2.43842	3.94931	3.68863	3.59364	2.61736	3.05983	3.36676	2.49708	3.85507	3.37703	1.86278	3.64874	3.46948	2.85475	3.55424	2.81894	3.61371	4.02667	3.45472	3.28558	2.25159	3.56618	4.16713	3.51617	4.23146	3.41986
ANKRA2	2.69671	3.56746	3.39366	3.90378	4.09294	4.83543	3.58251	3.69975	3.64873	3.44425	2.87453	2.8043	4.91038	4.09031	4.28757	4.23106	2.67355	3.27502	4.22112	3.95209	4.8252	3.6679	4.31522	3.83719	4.87605	4.79905	3.82641	3.16341	3.4048	3.37907	4.84536	3.69073
ANKRD10	6.17683	5.84969	6.30433	6.31147	4.3843	6.09347	6.15433	6.32108	5.43166	5.99544	6.24731	6.8516	7.16572	6.92257	7.23003	6.85862	5.72978	5.78999	6.79668	6.58878	6.90179	6.74629	6.33537	5.52794	6.90377	6.55422	5.14973	6.01374	6.36948	6.30966	8.42965	5.15052
ANKRD11	5.13969	4.68058	4.60748	5.77911	4.6075	4.2874	3.98102	4.70264	4.78308	4.73886	4.51135	4.45007	5.09643	4.47302	3.64781	5.21758	4.14224	4.64947	4.31512	3.9871	4.22341	4.59475	4.53922	4.09515	4.12694	3.93019	2.99966	4.37166	4.85921	4.99318	5.1027	4.74348
ANKRD12	4.03632	3.04201	4.64562	4.58206	4.0963	4.55492	3.18108	3.36543	3.91085	3.6272	4.21387	4.63733	4.44279	3.34895	3.37358	4.11516	3.35864	4.19784	4.43646	3.69095	4.48472	4.06635	4.02454	3.61563	4.08922	3.98165	2.57938	4.3473	4.67899	2.99779	4.55965	4.00569
ANKRD13A	4.19379	3.99732	4.33378	4.33708	4.33517	5.11554	3.40384	3.94157	4.13014	4.7385	3.54144	3.76798	4.3103	5.42439	4.9265	4.15204	2.86024	4.57302	4.72811	3.98537	4.28701	3.75443	4.46984	4.75524	4.07252	4.03955	3.60401	4.29262	4.54833	4.617	5.51524	4.50382
ANKRD13B	5.32154	4.08741	4.7324	2.7326	5.18626	3.90002	5.01227	3.61048	3.78297	2.78808	3.62718	4.80887	3.99494	6.16017	3.39189	3.68646	3.83058	2.95303	3.25819	4.90822	3.2019	3.84449	2.53127	1.87537	3.08328	3.54335	1.36207	2.76506	2.70396	3.94202	3.37981	3.7259
ANKRD13C	3.82577	3.7616	4.8788	3.72944	4.35162	4.10482	3.49808	3.36015	3.93416	4.62132	3.79373	4.44789	3.87113	3.3149	3.38912	4.48279	2.26861	3.9731	4.08941	3.78365	4.03199	4.23664	3.34566	4.40495	4.02406	3.72423	3.2218	3.89558	4.13983	3.51646	4.67935	4.26636
ANKRD13D	5.03579	3.85174	4.73919	5.13146	5.22158	4.75713	4.1842	4.75932	5.21793	4.65178	4.53555	4.91939	4.59943	4.89541	3.91394	4.99419	3.14818	3.86372	4.86019	4.6378	5.09662	4.69065	4.65888	4.7522	4.9354	4.84034	3.18077	4.66901	4.90523	5.19787	4.64341	5.3344
ANKRD16	2.22935	2.63133	2.37932	3.06643	2.12011	1.58133	2.78929	2.0887	3.48415	2.27608	2.14048	2.56807	2.5144	2.56563	2.39436	3.01484	1.27396	2.48044	2.89411	3.64116	2.96968	2.5066	2.60943	3.45827	2.81627	2.66179	1.04932	2.71373	2.62236	3.9107	2.46497	2.1649
ANKRD17	3.9042	4.42513	4.64062	4.50523	4.5291	4.5027	4.63603	3.9988	3.94367	4.31666	3.94949	4.11999	4.529	4.10193	3.90631	4.77664	2.95651	3.69294	4.27359	4.3697	4.84876	3.70099	4.84468	4.30001	4.83729	4.75971	3.38299	4.18559	4.32971	4.57269	4.86466	4.63611
ANKRD18A	1.58217	1.94616	2.93469	1.32204	1.24651	0.954713	2.07229	0.560146	3.6214	1.70747	1.67318	1.33834	2.05757	3.96317	0.760935	0.870254	0.955861	1.65156	2.33904	0.957136	2.22656	2.59283	1.68148	2.69717	2.75874	2.16967	0.705568	3.48082	3.34406	1.98609	2.50088	1.63042
ANKRD18B	2.0699	0.83988	1.75576	2.07552	2.14247	1.74047	0.00125218	0.658029	1.63479	0.859493	1.51805	1.0047	1.9587	1.9866	2.21662	1.16762	0.98789	0.0491949	1.78895	0.630504	0.0281721	0.381662	0.474502	1.42794	0.00278569	0.0932995	1.65766	0.73974	2.49754	2.54597	2.76337	0.363846
ANKRD20A1	0.151303	0.470272	0.263427	1.66908	0.215969	0.870476	0.648727	0.154692	0.216625	1.34147	0.0652824	0.832206	1.06817	1.02845	0.85058	0.260403	0.0563996	1.21309	0.98946	0.113366	1.58609	0.826727	1.63917	0.731232	1.47196	1.07863	0.0494146	0.176193	0.18817	0.553825	2.15128	0.603236
ANKRD20A2	0.134677	0.329796	0.130925	1.87276	0.579235	0.755312	0.862158	0.259054	0.111479	2.02687	0.0756346	0.649983	1.80224	0.447802	1.56672	0.144169	0.085244	1.88348	0.6359	0.0938628	1.47171	0.789709	1.55102	0.903612	1.52833	1.16573	0.0923181	0.323239	0.32738	0.512125	2.18689	0.418656
ANKRD20A3	0.117022	0.124443	0.130893	0.554445	0.123288	0.328641	0.1298	0.055261	0.0864486	1.32791	0.101153	0.187479	0.753166	0.607809	0.429547	0.082078	0.0855802	0.720874	0.318912	0.0690404	0.435968	0.608583	0.506073	0.181476	0.486518	0.190704	0.096238	0.165734	0.0881401	0.157289	0.719602	0.353387
ANKRD20A4	1.13486	0.252341	1.5853	0.695938	0.321343	0.125266	0.885331	0.211395	1.20312	1.58538	0.661487	1.19577	1.85534	1.38099	0.760796	0.281809	0.165841	3.19951	1.38777	0.28837	1.51118	1.08444	1.05083	1.17825	2.00932	1.59641	0.726248	0.777846	0.838105	1.08538	1.98118	0.578239
ANKRD22	0.465351	0.112705	0.120603	2.5081	0.252122	0.416969	0.0929451	2.48014	1.71143	0.317419	0.217306	0.146658	0.547082	0.167933	1.13721	0.143619	0.0711698	0.249707	0.214273	0.150913	0.45054	0.144546	0.304448	0.340585	0.305576	0.139944	0.0719014	0.58643	1.04153	4.70923	1.62996	1.4802
ANKRD23	2.0137	2.13816	2.12659	2.14924	2.13353	3.08147	1.84523	1.91796	2.31198	1.65736	1.48127	2.17208	2.3145	1.89138	1.18214	2.19479	1.06982	1.16715	1.53222	2.49726	2.47885	2.57512	2.32526	1.94422	2.82957	2.21671	0.778819	1.93651	2.03192	3.36823	2.24302	2.43689
ANKRD24	0.526395	2.75564	2.69261	0.421447	2.39722	0.563733	0.781876	1.19835	5.79351	4.85194	1.42992	2.4575	3.00805	3.87702	0.898082	1.80316	4.04533	2.41481	0.793514	1.00517	1.16978	0.589548	0.416113	2.26317	1.63291	1.19796	0.651977	1.14296	0.967979	1.10627	1.62895	0.359379
ANKRD26	2.3136	1.98189	2.87977	2.42165	2.19304	2.66554	2.50312	2.55959	3.61269	2.23096	2.56665	2.53046	2.88759	1.89521	1.79849	3.46798	0.97755	2.80702	3.04093	2.94768	2.84847	2.72328	2.83351	2.74231	2.68227	2.25565	1.7144	2.48213	2.48011	3.14076	3.06283	1.87399
ANKRD27	3.50652	3.69623	4.23414	4.22956	4.26944	4.50323	3.38913	3.35261	2.93099	3.71659	3.91007	4.19135	3.91397	3.21296	4.09497	3.80544	1.88421	3.29411	3.79139	3.40328	3.79968	3.13806	4.24909	3.62528	3.37108	3.64296	3.52	3.90455	4.28267	4.17036	4.25612	4.72351
ANKRD28	3.65658	4.01643	3.84745	3.96859	3.94751	4.11839	3.44174	3.35776	2.87119	4.04872	2.99226	3.45651	3.07574	4.48421	3.43847	3.60645	2.76586	4.61076	4.71291	3.16906	4.39663	4.42455	3.52448	3.53292	4.33713	4.47332	2.26048	3.42623	4.39785	4.00567	3.86866	4.71443
ANKRD33B	0.0273159	3.04444	0.278043	0.394558	0.215956	0.640925	3.9036	0.32565	3.08314	2.01686	0.243763	0.460382	0.0405675	4.41946	0.0786104	0.678057	2.43351	2.90646	1.24796	0.0191381	2.75848	1.42128	1.04652	1.3768	2.08499	2.13709	0.0304689	0.985316	0.974885	2.51178	0.0543034	0.247654
ANKRD34A	0.36007	0.638061	1.05004	0.448678	1.07959	0.36543	1.83188	0.656996	0.309179	0.440207	0.280948	0.504977	0.70168	0.298377	0.454034	1.06727	0.131087	0.213224	1.53805	0.908455	0.903529	1.26417	0.436017	0.95129	0.860893	1.03054	0.554819	0.723016	0.692336	0.303375	0.626553	0.393376
ANKRD34B	0	0.579312	0.836856	0.163962	0.365909	0.100477	0.0102035	1.60647	0.35536	0.417135	1.73675	0.0456487	0.101869	0.249478	1.30043	2.80321	0.223025	1.49747	0.951367	0	2.30724	0.851955	0.928743	0.032848	2.14544	2.50942	0.0756954	0.48118	0.363711	1.50421	0.967284	0
ANKRD35	0.421326	0.396752	0.691837	1.14127	2.91346	1.25866	0.0188634	0.378496	0.421637	0.368033	0.68247	0.523815	3.44481	0.0190913	1.81303	0.970541	0.0255982	0.145958	2.69254	0.910386	1.5069	0.742872	0.0221025	2.26268	0.384298	1.4288	2.45011	0.449047	0.919954	0.146129	3.77605	1.94964
ANKRD36	1.88729	2.60227	3.70978	2.92811	2.91717	3.86239	3.04569	1.9922	3.69738	2.80527	2.18377	3.17927	2.80509	3.38157	2.15613	2.06086	1.1966	2.73477	2.36407	2.57572	3.49991	3.01165	3.09026	2.79414	3.65135	2.88862	1.49169	2.61944	2.82293	3.24713	3.54351	1.58171
ANKRD36B	1.38576	2.769	3.09463	2.6959	2.85243	3.428	3.08228	2.48878	4.05693	3.04013	2.00621	2.70389	3.41935	3.55909	1.88095	2.91479	1.66715	2.17098	2.80361	2.17443	3.95875	2.96789	3.53752	3.15394	3.93799	3.19121	1.56764	2.30722	2.43511	3.22352	3.47549	1.37199
ANKRD36C	2.43585	3.17146	4.25702	3.51358	2.95502	3.88637	3.64339	2.56869	3.97566	3.33311	2.3682	3.86966	3.80361	4.1772	2.75071	2.89517	1.79199	2.87214	3.60342	3.17192	3.95841	3.15118	3.85384	2.82622	4.02727	3.09001	2.42659	2.74515	2.91262	3.69449	3.93734	1.28576
ANKRD37	3.80932	3.76537	3.72853	4.46101	3.38082	4.52574	3.2433	4.12982	3.66157	1.87932	3.4437	3.24971	3.52126	2.11511	4.20968	5.38509	2.86622	2.23618	3.60101	3.1438	4.29464	3.03235	4.22759	2.24261	4.39416	4.16748	3.51111	3.08773	3.13063	1.99491	4.78645	3.32603
ANKRD39	4.32587	3.48843	4.16071	4.35106	4.59723	4.38896	3.91767	3.4518	4.55721	3.32054	3.93165	3.83534	4.22207	3.35937	3.77458	4.32214	2.18006	2.92568	2.86655	3.9107	3.91611	3.36496	4.13553	3.7788	4.09137	3.52785	2.7187	3.10017	3.61641	4.74885	4.13444	4.14959
ANKRD40	4.67598	4.52999	5.8831	5.29133	5.53403	4.77887	4.69085	4.56939	4.79994	4.82431	4.62598	5.42879	4.95773	5.92546	4.63921	4.90238	4.2961	3.84431	4.90645	5.21475	4.59163	4.70071	4.80659	4.87004	4.54397	4.50587	3.87756	4.50598	4.82085	4.41441	5.7866	4.51215
ANKRD42	2.84085	1.49024	3.17601	2.36689	2.60747	2.92382	2.51912	2.28587	3.52361	2.37067	2.76063	2.65962	1.33401	1.89748	1.71938	3.7184	2.79348	2.39866	2.71846	2.05047	2.74565	2.32073	2.06136	3.33666	2.89295	2.17418	0.777615	2.59867	2.5263	2.78027	2.41876	3.41389
ANKRD44	1.28272	1.41643	2.2111	1.50984	0.977998	2.17963	1.22772	0.700213	1.55631	1.54405	2.14047	0.908923	1.40691	1.50039	1.68809	1.2613	0.92998	1.77135	1.16316	1.36593	2.05902	1.85885	1.0465	1.96209	1.89136	2.06244	1.00988	1.28582	1.55344	1.858	1.96602	0.787628
ANKRD45	1.21566	0.107527	0.417816	0.250909	1.72829	0.0254008	0.0551426	0.397708	0.0528439	0.507638	0.418947	0.138687	0.0476732	0.381061	0	0.278175	0	1.46939	0.373837	0.0422384	4.43912	0.0397656	0.198537	0.11018	4.65562	3.73932	0.0487632	0.0847532	0.0432975	2.30419	0.158806	2.46733
ANKRD46	2.9511	4.08486	4.61697	3.80004	4.02372	3.91931	4.05655	3.00311	4.5909	3.7153	4.52665	4.08051	4.26578	4.39759	3.69303	3.87182	3.08098	3.97108	3.09691	3.22913	2.7966	3.97299	2.73137	3.88919	2.68771	2.64871	2.78149	3.16627	3.97673	4.35248	4.35272	3.97697
ANKRD49	4.32472	3.46593	4.23732	4.29303	4.55279	4.23661	2.84529	3.39378	4.19255	3.91065	4.08323	4.06797	3.89462	4.72149	4.10933	4.26787	3.04633	3.73607	4.38506	4.07462	4.19238	3.8127	3.96665	4.52671	4.16429	4.21467	3.11758	4.45737	4.50466	4.56948	4.87981	4.35532
ANKRD50	2.47511	4.13565	3.47042	4.1977	4.06698	3.60236	2.83246	2.54213	3.83166	3.70965	2.40082	2.83356	3.60552	3.02484	3.41964	3.91098	2.44745	3.18205	3.02679	3.1154	3.8205	2.45916	4.09873	3.19528	3.98565	3.60993	2.37003	3.43501	3.6424	2.91965	3.96156	3.50624
ANKRD52	2.61883	4.25259	4.43267	4.14912	4.84249	4.46643	3.66082	3.90311	4.31593	4.41077	3.91272	4.59027	3.71361	3.70079	3.5213	4.1773	2.61519	4.0428	4.67913	4.2076	4.52624	4.33603	3.90031	4.16175	4.47218	3.96648	2.56665	4.14374	4.25304	4.37398	4.52318	5.10309
ANKRD53	0.270375	1.28126	1.8921	1.05114	2.1336	1.41286	1.35389	1.08991	2.02335	0.304023	0.807092	0.868392	0.875959	2.11491	1.73615	2.35511	0.842723	0.706756	1.97434	2.60146	2.75478	1.67201	1.94719	2.3072	2.77929	2.06904	1.48141	2.43093	2.37672	0.781988	2.08513	1.67156
ANKRD54	3.86241	4.96009	5.11224	4.28772	4.39069	4.2184	3.5789	4.01902	5.38087	4.58208	4.43645	4.22688	4.1761	4.49751	4.22856	5.1599	4.29713	4.53627	4.00099	4.35801	4.04311	4.21163	3.58108	4.69506	4.03848	3.95845	3.3428	3.48765	3.60232	4.12287	4.2718	4.12748
ANKRD55	0.564693	0.0438376	0.0665474	0	0.801329	0.0481303	0	0.342309	0.226453	1.68969	0.0297714	0.130336	0.265348	0.470927	0.320318	0.0514485	0	1.06758	0	0	0.417877	0.791869	0.0258395	1.42848	0.427179	0.182725	0	0.110199	0.0613067	0	0.385914	0.0283871
ANKRD6	3.17772	2.38148	5.89399	2.34489	3.87283	4.03194	2.98713	3.07466	4.33801	5.69113	5.6214	5.05971	5.98009	2.15801	2.24693	4.5992	0.72404	4.9748	4.6424	3.42769	4.77226	6.67096	3.47135	4.7577	3.82205	4.49001	3.4749	4.27506	5.21207	3.44113	5.76014	1.95785
ANKRD61	0.903621	1.42874	1.10744	1.77566	1.68434	1.89224	1.77685	1.40685	1.80684	1.11062	1.22006	1.47972	1.76562	1.31679	0.645544	1.32111	0.776574	1.30295	1.79161	1.07776	2.01862	1.88891	1.70843	0.964049	2.19358	1.57853	0.642819	1.42782	2.00851	1.34771	1.69901	1.8068
ANKRD63	0	0.244444	0.172389	0	0	0.111536	0.794835	0	0.119794	0.90251	0.838303	0.743964	1.18324	0.47911	0.0509966	0.193302	0.567914	1.18806	0.208834	0	0	0.438724	1.00384	0.0720402	0.140732	0.238812	0	0.143474	0	1.78262	0	0.228877
ANKRD65	5.74269	7.23583	5.14721	6.40243	6.52044	6.07381	3.00669	4.35086	5.72624	8.66179	5.31478	1.74649	4.22307	6.17208	5.44697	8.24313	4.20298	6.81172	6.73965	3.27596	6.52292	7.60549	7.00811	4.77315	6.87177	5.9275	5.69303	6.28988	6.35725	1.55458	5.59617	3.86963
ANKRD7	1.74135	0.593279	0.512811	2.0893	2.45599	2.43899	0.712159	0.966022	0.199308	0.854736	0.310168	0.0453897	1.393	0.533976	1.60279	1.68722	0.577645	1.61391	0.331173	0	1.80326	0.234159	0.799547	0	1.20824	1.57256	1.12343	1.58601	2.57186	0.031201	1.83034	0.656374
ANKRD9	3.75323	4.71664	4.89379	3.12393	3.39446	4.67022	3.57441	4.36033	5.18055	5.42071	4.74718	4.96982	5.22032	2.71958	4.68729	3.9876	2.91702	4.51948	5.09541	5.1137	4.94333	5.42049	5.4222	5.32309	4.65157	4.91586	2.96385	4.87897	4.67342	4.34219	4.57867	3.87065
ANKS1A	3.6104	4.74695	4.06527	3.81636	3.31674	4.13065	2.94101	3.56635	4.01239	4.17658	4.02016	3.933	4.05052	5.40524	2.79817	3.85363	2.51261	3.75952	3.85371	3.46448	3.46094	3.88346	3.50263	3.20936	3.58378	3.46063	2.89708	3.3335	3.51268	3.62298	3.80666	3.97146
ANKS1B	1.97255	3.11029	1.04534	2.43688	1.5267	0.370534	2.66014	1.45674	3.1537	3.62293	0.883845	0.133573	0.0763729	4.42448	1.53531	2.12939	1.65034	4.70049	3.1653	1.03665	3.36198	1.84156	2.50691	3.24946	3.50231	2.96406	0.0467146	2.6279	2.88869	1.16248	1.47366	1.25751
ANKS3	3.96989	3.41567	4.07299	3.37235	3.13592	3.55423	2.81426	3.6575	3.14228	3.19162	3.38588	4.31453	3.35233	3.1464	2.38622	4.69254	2.77002	2.98935	3.95863	3.42303	3.69958	3.87686	3.86584	3.24298	3.81653	3.93472	2.41216	3.10169	3.60823	3.10045	3.36581	4.19549
ANKS6	3.93741	3.5548	4.018	3.4603	4.00928	3.34062	4.00213	3.17978	3.16903	3.5399	3.45166	3.57661	2.66134	4.08164	2.61301	3.18262	2.56437	3.68973	3.64952	4.20399	3.00616	3.8574	2.14509	3.92766	3.31579	3.08808	2.43731	3.03235	2.8791	4.07335	3.68893	2.64982
ANKUB1	0.117837	0.399359	0.504268	0.343849	1.31553	0.316579	0.1867	0.464277	0.378366	0.381091	0.566829	0.303942	1.4141	0.496174	0.18424	0.345934	0.236271	0.17629	0.496882	0.377337	0.288079	0.656226	0.189931	0.362687	0.276821	0.346885	0.827484	0.389748	0.657039	0.312767	2.02274	0.410516
ANKZF1	4.1869	5.37005	4.33509	4.50743	4.40111	5.32897	3.41671	4.91375	5.13202	3.68416	4.61358	4.26097	4.54283	4.27754	3.56069	4.61724	3.72915	4.16514	3.92478	3.95991	4.99494	5.12279	4.38948	3.95904	5.19782	4.53886	3.07189	3.94156	4.31756	5.20963	4.70073	4.69455
ANLN	4.097	4.85124	4.09736	4.57285	5.62055	5.43821	4.64934	4.93619	5.43407	4.51177	3.86928	3.80327	4.72625	4.19394	4.85504	4.91032	3.57839	3.99143	5.54454	4.51023	4.83737	4.60653	4.26646	4.96299	4.88031	4.50662	3.69739	4.72439	4.92408	5.93841	5.52639	4.97229
ANO1	0	0.450335	0.100211	2.24094	0.232646	0.292397	1.0021	4.38677	0.763722	1.32739	0.0216757	0.621659	4.45122	3.08541	3.67649	3.21846	1.22064	4.44709	3.66349	0.0411218	3.61868	1.48345	0.627097	3.70202	3.40879	4.10356	0.0840471	0.0124967	0.0137864	0.550098	3.85511	0.0188373
ANO10	2.60183	3.28975	3.61781	3.27566	3.14691	3.17018	3.60858	2.64946	3.41191	2.93996	3.05204	3.30538	2.44757	2.30938	2.64867	3.10254	0.978637	2.7106	3.24626	2.32523	3.28215	3.52372	2.52285	3.61586	3.35594	3.53953	2.40735	2.59519	2.89436	3.53633	2.52067	2.90873
ANO2	0.0336379	0.0812245	0.0165812	0.073046	0.275774	0.0595057	0	0.282824	1.04303	0.0127847	0	0.00638087	1.36143	0.589238	0.287473	0.21822	0	1.05775	0	0	0.0126394	0.0201992	0.0241462	0.228555	0.223286	0	0.01505	0	0	0.204453	0.219192	0.0464439
ANO3	0.0352707	0.636792	1.46167	0.987338	0.312531	0.104359	0.0337722	0.319942	0.66689	0.007166	0.757558	2.04604	0.00517868	0.0131745	0.181894	0.0183895	0.692392	0.154996	0.0100397	0	0	0	0.0894232	0.011516	0.069717	0.0393772	0.0131454	0.208757	0.193272	0.0919741	0.190239	1.70978
ANO4	2.73758	0.847227	1.14481	0.764715	2.4832	0.0509317	1.26808	1.71797	0.230476	2.81266	1.15665	0.0327688	2.63855	2.36637	0.676428	2.92333	1.14118	3.47333	2.79593	3.94154	2.86169	1.52093	1.07566	0.175379	1.88451	3.62047	1.0832	0.951619	2.26505	0.0966697	2.36981	1.83025
ANO5	3.73065	3.27157	2.2469	3.79972	4.1156	3.37804	2.3421	0.967208	4.05616	1.75353	2.27072	2.86066	2.30288	2.05761	0.624487	0.968967	2.38519	2.68379	3.25787	1.069	3.26368	1.8602	3.05207	3.36517	2.72449	3.14885	0.846607	3.64435	3.44037	0.0233974	1.1446	3.43902
ANO6	3.64974	3.52045	2.92256	4.89577	5.39575	4.78483	4.18815	3.30162	0.399865	4.14441	3.34899	3.71167	4.89398	4.31309	4.88681	3.08492	1.50275	4.44842	4.73575	4.94289	4.25119	3.92015	4.80096	0.257743	3.98482	3.46658	4.29754	4.21834	4.38532	4.72061	5.69101	4.08438
ANO7	0.186996	0.356232	0.341261	0.414064	0.590121	2.06906	0.774147	2.34282	0.639256	0.114904	0.381725	0.183678	0.511815	0.775991	0.809662	0.31236	0.0637143	0.245982	0.533907	0.185401	1.22132	0.216931	1.01932	0.759438	1.06538	0.81578	0.227715	0.572233	0.513827	2.12714	0.930376	1.90611
ANO8	2.54314	5.45529	4.45081	4.05597	4.48325	5.53731	3.74247	4.18294	5.11912	5.19453	3.93583	5.03287	4.80381	4.27282	3.48888	4.66162	2.74733	4.87242	5.00848	5.26286	5.06041	5.37685	3.6729	4.18579	5.11346	5.19099	3.45075	4.11293	4.03825	4.52233	4.38225	3.08892
ANO9	5.62958	2.02634	4.57891	4.67106	4.18385	6.56799	6.65992	4.03479	4.18528	2.9286	5.71667	4.50312	4.71974	0.613589	2.90252	4.05338	2.81111	2.84602	5.9329	3.81167	5.59462	3.81905	6.0758	3.57143	5.11008	5.24721	3.0737	4.22291	5.01308	4.36718	5.10194	7.28612
ANOS1	0.148318	2.28956	2.80201	1.94634	0.34735	1.27142	0.796849	1.80337	1.62912	4.11735	3.45005	1.4072	2.53834	0.557874	3.96039	2.87959	1.60006	3.39667	5.0288	0.884761	5.30353	3.95685	5.92645	4.9677	5.44536	4.57171	0.365444	4.54634	5.29875	2.26738	5.14805	4.3775
ANP32A	6.44748	7.15209	6.75832	5.88449	7.13037	6.44739	7.58883	6.97483	6.8166	6.65469	6.16912	7.29761	6.96015	8.17721	6.09937	7.28965	6.3229	6.60703	6.82105	7.34604	6.54937	7.06868	5.86097	6.29	6.5018	6.46662	5.38717	6.3922	6.37668	7.38333	5.9804	5.74648
ANP32B	6.94029	7.92054	7.98052	6.71273	7.8422	7.82976	8.24354	7.75127	7.65664	8.13607	7.76625	8.0271	7.8412	8.30727	7.92997	8.01878	6.27452	7.79987	7.36116	7.77531	7.15186	7.72712	7.51711	8.43811	7.26773	7.06038	6.84513	6.78358	6.85868	8.3057	8.31846	7.89089
ANP32E	5.64385	5.85962	6.31107	5.87906	6.29985	5.79733	6.95971	5.54426	6.47844	6.61206	5.40713	6.75669	5.59937	5.81567	6.92947	5.88413	5.72424	5.42061	7.80169	5.38757	7.43695	6.70002	4.98573	6.7422	7.82985	6.99203	5.21045	6.47526	6.59062	5.94974	8.21928	5.73603
ANPEP	0.170359	0.011322	0.0717599	0.0321572	0.0528784	0.200081	0.0532674	0.485336	0.0817122	0.0755595	0.282709	0.0728125	0.0842231	1.96137	0	0.589336	0.0848177	0.0474404	0.540834	0.0485771	0.890696	0.0653296	0.0125716	0.843971	0.360556	0.544767	0.027639	0.0632232	0.0746398	0.107955	0.0194494	0.172682
ANTXR1	0.339004	3.15765	2.99208	0.753035	2.67301	2.54984	5.63056	1.93853	1.60837	3.56852	1.98722	0.85425	2.16484	4.98061	0.804977	3.30201	1.56284	4.72761	4.23893	4.01684	5.3838	4.02339	3.12044	4.42991	5.14572	4.89487	2.38071	3.99629	4.96416	2.89325	0.479015	1.83948
ANTXR2	2.01491	3.32819	1.70826	4.2977	3.5775	0.478751	2.98806	2.79951	3.38236	3.03535	3.11111	2.02054	2.22234	4.08612	2.03939	2.31544	2.77261	3.37933	2.29199	4.56272	1.69825	2.85407	2.21184	0.0397773	2.34542	1.80944	0.0540471	3.3183	3.547	0.11308	3.62399	0.342229
ANXA1	0.621425	0.853986	3.14195	4.85175	0.438596	6.3631	0.421385	3.21837	0.438674	0.104144	1.54651	0.491361	4.56153	0.818287	4.96304	0	0	1.00193	3.91486	1.96054	1.44777	1.22118	2.52033	0.202086	2.14515	1.73086	0.854505	4.4202	1.80177	10.9285	7.34053	4.33426
ANXA11	6.52257	3.82199	6.4057	5.23488	4.97666	6.42587	3.45023	5.14871	5.66057	3.72387	5.36959	5.5016	5.08952	1.97496	5.06682	4.98939	1.90302	5.13156	6.77566	5.15135	6.19897	3.59868	5.00135	5.2341	5.89323	5.30022	4.26339	5.3542	5.19022	5.0504	5.49348	5.87104
ANXA2	5.97501	5.44557	6.47597	6.26232	6.63533	7.70935	7.53525	6.15714	3.65401	6.57883	4.80305	7.42306	7.56255	6.93318	7.62578	4.9678	2.16286	6.71438	8.68409	5.16231	7.02997	6.85599	8.50796	7.50091	7.10473	6.7708	7.16691	7.83598	8.58012	8.73675	6.75979	6.67719
ANXA2R	2.77676	3.32568	2.09587	2.12991	0.752864	1.44965	2.89435	1.58199	1.32105	3.64401	1.2799	2.3091	4.39427	2.68217	1.91726	1.91162	0.644135	4.7598	3.43567	2.73664	4.84818	4.26931	5.21047	3.2592	4.85475	4.95192	1.71011	4.38826	4.78439	2.3659	2.50961	6.10424
ANXA3	1.06716	0.219822	0.455648	0.153262	0.939274	1.55689	0.0871184	2.5823	0.448049	0.50236	1.00208	0.367085	1.56057	0.291568	0.625589	0.105407	0.0494636	1.76834	1.01255	0.775576	0.10867	0.908507	0.698276	2.33103	0.390299	0.443404	0.344713	0.979088	0.778651	3.56193	0.762088	2.59552
ANXA4	4.06771	2.46304	3.71967	3.29642	2.64905	3.25677	4.4685	5.52205	2.79716	3.12459	3.1031	2.14134	3.03508	1.031	4.02927	3.46135	0.505704	3.44406	3.55341	2.58088	4.41515	3.0042	2.54622	5.9629	4.0816	4.19535	3.45485	4.38434	5.38124	6.82227	5.0914	4.83332
ANXA5	6.01962	7.32606	7.16428	8.25312	7.4159	4.94559	5.35539	6.22631	6.61829	8.45869	6.3064	6.10425	7.32154	5.58057	7.54299	7.54493	3.52246	6.71279	6.59414	6.73046	7.58716	7.00678	7.3945	6.64824	7.60021	7.13228	5.3502	6.14332	5.71927	6.87696	7.88893	6.32821
ANXA6	0.201337	4.81333	2.20249	7.04762	3.49273	4.3373	5.79862	2.59585	5.37232	5.33444	1.43202	4.5953	2.86208	7.76604	4.87702	3.86526	3.70904	6.73053	4.97671	4.93248	5.27724	5.64409	6.3679	6.15514	4.98954	5.82201	0.475295	5.32668	5.9952	4.48774	3.86164	3.59845
ANXA7	6.2354	4.9697	5.8643	6.1034	5.37992	5.85276	3.89757	5.35463	4.75856	5.5406	5.11491	5.23078	5.82428	3.47919	6.09241	6.1186	3.00326	5.6912	6.26419	5.34598	5.95146	5.28187	5.10765	6.13444	5.81888	5.82724	4.51891	5.81464	5.95875	5.85824	6.31496	6.27658
ANXA8	0.0289625	0.159778	0.018666	0.0548287	0.0682599	0.231462	0.00906711	0.953474	0.484598	0.0699444	0.135797	0.0824524	0.127501	0.114733	0.0546859	0.00792294	0.228948	0.064355	0.0507616	0.0618689	0.0764068	0.000177746	0.139348	0.0405981	0.0550569	0.0545211	0.145011	0.151531	0.161317	3.45086	0.123187	0.0674839
ANXA8L1	0.00936293	0.103937	0	0.014626	0.014558	0.215954	0	0.583287	1.43156	0	0	0.00725213	0.0670455	0.192144	0.0060511	0	0.168883	0.0511241	0.0267226	0.0311694	0.0187249	0.0223041	0.0512892	0.0255885	0.0412567	0.0114708	0	0.015133	0	3.8204	0.0161875	0.0184963
ANXA9	2.12579	1.3964	1.3063	2.39417	2.472	2.66647	1.72841	2.35229	1.64948	1.51084	1.27757	1.45092	1.72503	0.993357	2.30885	2.57345	1.09186	1.94828	2.76006	1.97763	3.0714	2.50267	2.38337	1.84167	2.77043	2.75953	1.20484	1.91894	2.00463	2.3675	3.92348	2.08518
AOC1	0.0889147	0	0.259384	0.768701	0.615401	5.99692	0.130364	2.99181	0	0.169331	0.672738	0.0338818	0.0561254	0.0711759	0.122372	1.30088	0.0621036	0.920523	0.0957907	0.0335383	1.5629	0.0968862	3.52464	6.60795	0.0211366	2.43012	4.00724	1.62539	3.82249	0.691197	0.00932845	6.81818
AOC2	1.13288	1.36217	1.0954	0.693727	1.91955	0.95599	0.78508	0.806481	0.350396	0.889064	0.630321	1.09502	0.57132	0.929901	1.16495	0.844909	0.230382	0.50694	0.578351	1.54931	0.274579	0.825088	0.366222	0.2682	0.368824	0.310348	0.924038	0.426872	0.603907	1.15473	1.40703	1.74123
AOC3	0.817918	1.0192	0.891244	0.47716	1.73834	0.698034	0.497735	0.926577	0.402353	0.474759	0.346681	0.885538	0.724764	0.885379	0.888651	0.775971	0.24397	0.639024	0.333809	1.4252	0.235487	0.580296	0.290519	0.180264	0.298875	0.228955	0.810178	0.113612	0.365623	0.759009	0.945874	1.40296
AOX1	0.445815	0.221557	0.0653129	0.0486968	0.113994	0.112044	0.0288049	0.533662	0.133275	0.200023	0.0661091	0.19546	0.0763853	0.183261	0.0101841	0.0962068	0	0.623818	0	0	0.48436	0.872909	0.0226928	0.287618	1.26136	0.11982	0.0126883	0.0544697	0.153097	0.0157444	0.0593477	0.165981
AP000275.65	1.40722	1.8679	1.53642	1.27011	0.885621	0.835204	0.25531	1.22577	1.23403	2.8946	1.16506	1.54427	1.14659	1.01313	1.62799	2.8797	0.357147	4.27447	2.78007	1.76338	2.99573	2.00184	2.99125	3.22514	2.46764	2.20165	0.0547375	1.95523	1.95369	0.330758	1.31159	1.34967
AP000322.53	0.288105	0.0954486	0.239774	0.127928	0.611104	1.75127	0	0.298065	0.0243517	0.121619	0.294904	0.387909	0.224125	0.161716	1.49043	0.966561	0	0.123884	2.50121	0.308883	2.36466	0.217904	4.95076	0.0545113	0.797599	2.04716	0.0984174	1.01937	1.99918	0.0261956	1.48818	2.83707
AP000350.10	0.963059	0.21712	0.225809	0.618545	1.15541	0.603898	0.517345	0.83445	0.396341	0.0824181	0.0933672	0.424211	0.484792	0.0835231	0.233876	1.09192	0.156804	0.420665	0.356322	0.134781	0.138926	0.534881	0.563069	0.105058	0.378852	0.156128	0.526203	0.518029	0.226004	0.253453	0.148612	2.53795
AP002962.1	0.509631	0.672024	1.9617	1.24473	1.08304	1.01624	0.680784	0.743712	1.58131	0.935584	1.20788	1.1384	0.884715	0.956638	0.509424	1.12433	0.61748	0.782647	0.98862	0.588798	1.42085	0.812374	1.03686	0.728571	1.64732	0.772824	0.375147	0.634649	0.899873	0.995617	1.13171	0.761532
AP003419.11	1.99778	1.59933	3.08153	3.14671	2.17424	3.50094	1.93889	3.00855	2.854	2.06067	2.68893	2.36361	2.85836	1.62244	2.95969	0.182151	0.795706	0.982875	1.72338	2.32495	2.40923	1.99252	2.54443	2.49887	1.78921	2.60573	3.44622	1.43095	1.19203	2.5282	2.2553	3.52018
AP006285.2	1.41976	1.00514	1.73893	2.07148	1.18275	1.696	0.435657	0.567505	0.945665	0.459953	2.23217	1.90881	1.54598	0.71047	0.781126	1.01994	0.87637	0.452421	1.26035	0.995033	1.08712	0.62043	1.72053	0.219683	1.14458	1.29803	0.730129	0.492867	0.534645	0.841628	1.53793	1.57757
AP1AR	4.44692	4.92738	3.95036	4.76143	4.56934	3.26926	4.39715	4.19877	4.79099	3.8832	3.12475	3.76374	4.02064	4.15882	3.91836	4.50342	4.44592	2.91722	3.25407	4.03971	4.21884	3.12561	4.78596	3.78897	4.55547	3.94914	3.01529	3.62832	3.86105	4.52838	4.59404	4.33765
AP1B1	5.07023	5.50301	5.51071	5.10307	5.56013	5.01122	4.90308	4.7407	5.94971	5.35927	4.59636	5.1052	5.14805	5.73826	4.83093	4.8399	4.21517	5.39936	4.64692	5.00336	4.62456	4.86913	4.37027	5.64842	4.45258	4.73274	4.97633	4.58447	4.63657	4.85387	5.13915	4.99875
AP1G1	4.48099	4.65431	4.86773	4.65837	4.47665	4.74264	3.58205	4.66489	4.71623	4.75633	4.23953	4.67742	5.04808	4.14254	4.88978	5.52308	3.85691	4.72013	4.29089	4.12054	4.27002	4.74284	5.15589	4.17279	4.11572	4.25625	3.59307	4.34403	5.04612	4.78548	5.70297	6.3095
AP1G2	5.20798	5.90697	6.41416	5.21332	5.86303	5.77035	3.70639	6.01457	6.21696	6.81123	5.74436	6.78631	6.75848	3.79686	4.91345	5.39191	3.70296	4.84068	5.6681	5.70281	6.13196	6.98455	5.62179	5.48319	6.13294	6.17326	4.53385	5.76452	6.07861	5.24736	5.82437	5.62159
AP1M1	5.0116	5.95807	5.60921	5.23457	6.03879	4.29597	5.59571	4.5525	5.50684	6.24658	4.94402	5.41789	5.49629	6.15974	5.86096	5.63682	4.20365	5.51221	5.21454	5.27567	5.2498	4.83174	4.9186	5.09726	4.96854	5.46291	4.41375	5.73672	5.64594	4.70242	5.78397	4.30685
AP1M2	5.94793	2.79118	6.12993	5.92333	6.35585	5.55924	0.0623618	5.78103	5.12438	5.80393	5.33937	5.61181	6.13899	0.103141	6.2087	5.73209	0.0507058	5.99352	5.8166	4.68816	5.49194	5.29403	5.34258	6.26273	4.79383	5.36731	5.136	5.77044	6.06525	5.2922	5.62938	5.22733
AP1S1	6.08177	5.06734	4.41598	6.34946	6.04353	5.52997	4.90164	5.42313	5.59133	4.55845	3.85644	4.37841	5.25555	4.46284	5.76835	5.71861	3.69764	4.88037	5.21389	5.5927	5.1645	5.22798	5.35333	5.71621	5.43838	5.07203	5.56887	5.23428	5.57666	4.80891	5.86799	6.13076
AP1S2	4.99147	6.02208	4.72701	6.20723	6.29422	4.07091	4.86349	3.45859	4.75081	5.43156	3.95195	4.68475	4.1084	6.25555	5.24398	4.3809	2.78404	5.56591	4.65337	6.20839	5.50072	5.26574	5.13636	5.37548	5.51706	5.37213	3.64184	5.79721	6.08687	5.23254	5.11279	4.01375
AP1S3	3.25763	1.75169	3.13982	3.21146	3.35851	3.2494	3.03754	3.22515	3.30661	2.23918	3.23608	3.28557	2.84957	3.76165	2.48648	1.91573	0.659266	1.99177	2.37582	3.24125	2.99235	1.44894	1.81285	2.88765	2.48771	2.07678	2.21572	1.66575	2.41828	3.28697	3.42302	3.05285
AP2A1	5.31404	5.71492	5.527	4.94742	5.03715	5.95556	4.63931	4.93573	5.86782	5.98591	5.03275	5.44713	4.97416	5.7514	4.59915	5.23897	3.8762	5.31169	5.71006	5.0491	5.56601	4.97215	5.72012	5.48219	5.38536	5.65723	4.96321	5.24253	5.13618	5.55874	5.60173	4.69071
AP2A2	4.57222	4.36171	4.81533	4.74724	5.2731	5.40128	4.5072	4.27112	5.11588	4.51641	4.58527	4.51806	4.27769	4.81497	4.4765	5.29683	3.19821	5.00534	4.91824	4.57282	4.95811	4.43098	4.65291	4.4023	4.88442	4.63842	3.70164	4.66698	4.95921	4.89981	4.67203	4.64016
AP2B1	5.70597	5.80816	6.79724	6.61053	6.75256	6.02516	5.52147	5.53569	6.73368	6.57309	5.63674	5.99043	6.26566	6.68534	6.86985	6.25722	4.72592	6.05819	6.55566	6.22028	6.09886	5.43321	6.30754	5.44089	5.95046	6.07934	4.89149	6.79421	7.32514	4.46025	6.97152	5.98525
AP2M1	6.77438	7.15257	7.93374	7.43723	8.1644	7.80746	7.14066	7.91473	7.46794	7.41161	6.45409	7.54861	7.12381	7.14462	7.2336	7.94365	5.96294	7.05746	7.42791	7.26164	7.21717	7.16465	7.75624	7.80809	7.19728	7.47687	7.31259	7.32795	7.48345	7.5124	7.47997	7.02637
AP2S1	6.84573	7.3826	6.84305	6.75679	6.74522	7.29053	7.18378	6.88181	7.04592	7.68831	6.62865	6.81137	6.67411	6.69595	7.09317	7.88808	4.77597	7.26215	6.62312	6.30373	6.59537	6.25454	7.06805	7.61805	6.41434	7.06415	6.29771	7.05437	7.0931	7.1629	7.13214	6.19717
AP3B1	4.2439	3.3734	4.29994	3.34322	3.8982	5.04328	3.8138	4.27961	3.59375	3.96332	3.72611	3.96834	3.99373	4.44085	4.82718	4.60894	2.0612	4.56135	5.20067	4.50451	5.12009	3.74388	4.2064	4.21951	4.80144	4.88614	3.74724	4.28735	4.11038	3.70577	5.1075	4.2977
AP3B2	4.66177	4.50143	4.82846	4.34632	4.46517	3.52066	3.49712	2.99526	3.84353	4.12415	4.06085	4.21763	3.7187	4.51852	3.54997	4.86199	1.85752	5.3539	5.26813	4.28765	5.16396	5.32846	3.67576	4.66345	5.08954	5.04352	2.90994	4.074	4.67999	4.00409	4.38737	3.79327
AP3D1	6.39692	5.98785	6.48677	5.76755	5.90831	5.87587	5.38112	5.59482	6.52939	5.90971	6.49206	6.39041	5.82984	6.0303	5.35751	6.10473	4.56435	5.54941	5.79484	5.43617	5.61414	5.03578	5.42115	5.49569	5.52408	5.65458	4.75292	5.50548	5.75725	5.8996	5.9532	5.70985
AP3M1	5.31207	4.61119	4.68041	5.29219	4.86224	5.10981	4.17398	4.30135	4.16741	4.65625	3.85361	4.39969	4.92885	5.12131	5.1961	5.66332	2.58372	5.10872	5.2059	5.18242	5.12203	4.3279	4.18377	4.34345	4.9697	4.54302	3.47353	4.58057	4.68627	5.23002	5.66029	5.2247
AP3M2	3.38314	5.23771	5.80453	4.63422	5.40939	4.83197	4.15498	4.68299	5.41221	4.80058	5.49388	5.18656	3.05633	5.56589	4.83253	5.588	3.93334	5.32352	3.99653	4.5565	3.51068	3.77657	2.33825	5.1778	3.53338	3.3395	2.6239	3.69181	4.95424	5.94708	5.66126	5.00566
AP3S1	4.11697	5.55876	4.67247	5.20258	5.22127	5.01561	6.0985	4.52287	5.10187	4.99724	3.79314	4.48477	4.47973	6.33239	5.77753	4.90792	4.8579	5.3339	5.5707	4.95846	5.86974	4.82206	6.19965	4.72619	5.86833	5.90988	3.52817	5.12367	5.26867	4.40587	5.71397	5.14484
AP3S2	3.48667	4.38729	3.86961	4.86141	4.44683	4.0088	3.78535	4.03512	3.3624	4.35655	3.2361	3.22907	4.67993	5.24701	4.54931	4.45956	3.26639	4.16371	4.59982	4.01347	4.76179	4.33842	3.63784	3.61732	4.65202	4.62452	2.7093	3.76227	3.82795	5.25808	4.49599	3.90219
AP4B1	3.79015	3.94505	4.24122	3.58961	4.06706	3.97582	3.12666	2.9594	3.90023	3.47302	3.77277	4.29436	3.86432	3.20663	2.94789	3.55209	2.87539	3.18683	3.54851	3.56716	3.05089	4.12648	3.13976	3.3959	3.05853	3.22652	2.73848	3.22635	3.56789	3.90375	4.14486	2.63401
AP4E1	2.55623	3.06931	3.11073	2.89373	2.7219	2.61234	3.14287	2.50145	3.14292	3.10612	2.25832	2.84683	2.54862	4.30253	2.35585	3.5366	1.98585	2.98013	3.40659	3.1911	3.38426	3.20842	2.35738	2.61786	3.21429	3.09737	1.50817	2.32023	2.36334	3.0807	3.05619	2.38876
AP4M1	4.56518	5.04632	4.33896	4.90577	5.17366	5.77183	3.81741	4.94813	6.01141	3.92063	4.04096	4.55675	4.53293	3.5221	4.39677	5.33597	3.72344	4.33522	4.9657	4.94986	5.05219	5.08162	5.11274	4.54279	4.9143	4.73426	4.26433	4.83658	5.29991	4.74231	4.47162	5.6706
AP4S1	1.68437	2.71874	4.38387	2.02998	3.06672	3.44699	1.82097	2.51316	3.03541	3.40612	3.10517	4.10817	3.63497	2.74857	1.88069	2.3121	1.68244	2.43604	2.8981	3.21529	2.26854	3.9937	2.60351	3.39048	2.76306	2.65069	2.09451	3.23809	3.67574	1.63382	2.48023	2.06992
AP5B1	1.92105	2.66958	2.07841	2.91266	2.08018	3.86684	2.89736	2.84514	3.3515	2.75007	2.21452	2.42158	2.22331	2.62494	2.59172	2.71076	0.539671	3.05996	3.99168	2.68768	3.9445	2.746	3.30852	3.78551	3.77773	3.19167	1.453	2.05702	2.51178	3.4465	2.89315	3.12271
AP5M1	4.17739	5.00103	5.84255	4.56493	4.97852	5.11724	4.00388	4.26903	4.65702	5.34984	4.51964	5.89045	5.4413	5.16316	4.38638	5.5062	2.98812	5.19547	5.09581	4.97559	4.73801	5.02407	5.0521	5.12392	4.68097	5.03953	3.84664	5.12749	5.25547	4.53395	5.11787	3.68489
AP5S1	4.30696	3.47972	3.48098	3.84895	4.21011	3.69483	2.9081	3.49254	3.57037	3.52676	3.57517	3.06286	3.17119	3.04433	2.60116	3.24761	2.15021	2.76193	3.26091	3.69528	3.27207	3.28613	2.33815	3.33007	3.20334	3.29631	2.44184	3.24652	3.17738	4.0414	3.3497	3.08478
AP5Z1	4.21092	4.5366	4.13829	3.94385	4.62395	4.07551	3.41521	4.41558	4.90281	3.93903	3.51906	4.10598	4.05504	3.46732	3.25519	4.70751	3.14954	3.94358	4.59833	4.12073	4.23421	4.68892	4.05807	4.35227	4.13966	3.99105	2.55532	3.86283	4.33836	4.092	3.79443	4.47486
APAF1	3.29069	3.64271	4.28203	3.85165	3.4907	4.15449	2.95308	3.53156	3.60416	4.87043	3.37747	3.52661	3.31315	4.28606	3.66478	4.19573	2.38214	4.79957	4.59998	3.32134	4.5165	3.70272	4.02303	4.18734	4.38212	3.70534	2.78345	4.43643	4.69725	3.50996	4.32967	3.88248
APBA1	1.61707	1.89026	2.64289	2.94891	1.64443	1.70054	1.32642	1.19801	5.4004	2.77513	2.45552	1.57826	2.256	2.16454	1.98346	0.641365	1.336	1.88842	1.52596	1.86906	1.12353	1.97659	3.09877	1.78683	0.759291	1.37019	1.03237	1.57503	2.74627	2.46258	3.13281	1.30793
APBA2	0.248249	2.01235	3.05735	0.0984001	3.26427	2.99812	4.71119	2.5511	3.36818	4.81234	1.96698	3.20926	0.369547	5.26487	2.47006	4.7704	1.92094	5.12158	5.81005	2.79041	5.5666	3.57716	2.50508	3.28315	5.18384	5.68349	2.00502	4.93681	4.88189	5.82954	2.99001	3.31035
APBA3	3.72763	4.71557	4.12202	3.86501	3.95757	4.13983	4.27589	3.14802	4.77425	4.28423	3.8919	4.1682	4.71209	4.12478	4.33959	4.10278	3.2555	3.70062	4.18166	4.07431	4.30149	3.78991	3.6014	3.79062	4.19845	4.35666	3.07097	4.07474	3.93023	4.00518	4.04076	3.52409
APBB1	3.77198	4.34697	5.51546	5.1199	5.54372	4.69446	4.72867	3.7433	4.87725	5.04905	4.74748	5.09227	5.29726	6.2918	4.82066	5.71122	4.16388	4.87378	5.15785	5.51619	5.36941	4.81296	4.63103	5.1813	5.07639	5.49631	4.17429	5.34348	5.10736	2.66691	4.88631	4.39171
APBB1IP	0.573276	0.042447	0.690325	0.0595597	0.234692	0	0.0199727	1.21116	0.0504732	0.0648182	1.06158	0.0710734	0.197719	0.128906	0	0.0406481	0.040382	0.011453	0.0542248	0	0.777279	0.0588396	0	0.0694546	0.866225	1.70343	1.03686	0.0438075	0.0247479	0.0105605	0.112374	0.0796757
APBB2	4.33496	3.68413	3.41082	5.78291	5.61841	2.80793	2.91671	3.49003	2.88486	4.87445	3.60174	3.99222	4.50144	2.69202	4.54742	5.397	1.38293	4.41444	4.02124	4.6549	4.94983	4.87265	4.08169	3.84116	5.46886	5.07538	3.32772	4.3853	4.39631	4.16784	4.77761	3.37392
APBB3	4.31286	5.2378	4.52411	4.11424	4.20294	4.5253	4.29094	3.73449	4.50072	3.68447	4.07325	4.76003	4.62042	4.94398	3.20979	4.07659	3.67651	3.34189	4.71572	4.26444	4.77849	4.8189	3.93934	2.92652	4.99198	4.99279	2.00807	4.01674	4.30958	3.84888	3.8484	4.93216
APC	2.78864	3.08978	3.39559	3.35222	3.78453	4.04549	3.31487	2.37564	2.6823	3.20698	2.76843	3.13989	3.36504	4.54027	3.48947	3.36456	2.27925	3.28443	3.78198	3.42459	3.91413	2.60351	3.22259	2.30205	3.80203	3.69085	2.00248	2.46457	2.31603	2.78531	3.68044	2.79065
APC2	0.512361	1.42237	3.08967	1.14031	2.63725	0.553975	2.29435	2.74032	0.968114	1.71109	1.20379	3.88666	1.77787	4.15343	1.19035	5.02785	0.991987	4.08551	1.14849	4.01888	0.787074	1.35055	1.04399	0.948237	0.872875	0.684554	0.630201	1.01572	1.19016	0.597272	0.880424	1.35522
APCDD1	0.252942	1.46707	0.603106	1.17337	1.64992	0.622767	2.89217	0.639874	0.771757	1.29792	0.0377925	0.0729888	0.306656	2.3914	0.808971	1.2076	0.283585	3.25299	1.4228	1.35831	2.51599	2.03639	0.228511	1.7486	2.64755	2.52743	1.6192	2.95664	2.02433	0.0755493	2.75228	1.20477
APCDD1L	0.0311475	0.303047	0.0351205	0.0195366	0.0523462	0.0186142	0.104586	1.63864	0.466984	0.135472	0.0696812	0.192892	0.0231593	0.721972	0	0.150007	0.0317286	2.52767	0.0370414	0.163094	0.0384277	0.583964	0	5.85938	0.118343	0.0433286	0.064188	0.0174065	0.0231574	0.092616	0.00991186	0.0166393
APEH	5.59325	5.18484	5.4651	4.71884	4.92325	4.94958	4.60242	5.55235	5.351	4.77334	4.47267	5.21224	3.9305	4.64941	4.28206	4.93962	3.35784	3.83423	5.21497	4.33688	5.69412	5.04486	4.37219	4.73394	5.91729	6.23978	3.62389	4.48963	4.48369	4.52509	4.42256	4.86417
APELA	0.251739	0.171417	0.288603	1.37721	1.27449	0.418197	0.301701	0.0942606	0.449395	0.403407	0.202331	0.35061	0.581324	0.38283	3.2707	0.341904	0.062228	0.376165	0.276498	0.229527	0.290111	0.318434	0.22371	0.384273	0.389168	0.309525	0.207455	0.533231	0.149661	0.726768	5.28403	0.37009
APEX1	7.66566	8.14213	8.56225	6.25057	7.39411	7.45029	7.01214	6.91402	7.90878	8.40488	7.88401	8.96467	8.12092	7.79666	6.88362	7.63707	6.79102	6.95387	7.33236	7.45583	7.02963	8.18477	7.2451	7.80973	7.17777	7.21308	6.16249	7.90148	7.75088	7.35829	6.52807	6.9972
APEX2	4.43902	4.7429	4.68858	4.05937	3.94506	4.21426	5.11634	3.97594	4.59845	4.61225	4.10258	4.27066	3.72966	3.84603	3.94251	4.28301	2.58197	3.88135	5.24423	3.6033	4.9513	3.90241	3.66132	4.06026	4.76393	4.55526	3.07085	4.72588	4.47731	4.18865	4.07682	3.76447
APH1A	6.22246	6.72296	7.26919	6.97855	7.3374	7.22125	7.96191	6.95431	7.05219	6.96687	6.27047	7.39781	7.10748	7.12351	7.72116	7.2405	5.98613	6.61029	8.17098	7.2168	8.23983	7.46026	7.11567	7.60111	8.1533	8.16734	7.31136	7.61009	7.70438	6.67139	8.20128	8.14036
APH1B	4.1817	3.12605	4.32726	4.23777	4.54402	3.0191	4.80577	3.33974	4.28262	3.284	3.49656	3.17782	3.90152	3.97467	3.3767	5.02253	2.86961	3.8903	4.15456	3.8375	4.1933	3.25651	3.55798	3.94801	3.80654	3.06031	3.26345	3.49672	4.02732	3.17883	3.7242	3.12221
API5	7.14734	5.20413	6.56217	6.36367	6.59877	6.51712	5.31936	5.84849	6.87002	5.87482	6.28515	6.33529	5.88187	6.71436	6.23458	6.65201	5.22541	5.93085	6.53441	6.04141	6.14325	5.67145	6.2535	6.4955	5.95589	6.16499	5.05763	6.77958	7.01931	6.51581	6.85467	6.08822
APIP	5.02758	4.40934	5.15406	5.38857	6.07244	5.49465	5.44929	4.46508	5.15639	4.43958	5.34452	5.45685	5.17447	5.50463	5.38637	5.50169	3.31499	5.05997	5.38908	5.96171	5.23909	4.97815	5.17631	6.02093	5.3824	5.27994	4.4695	5.55113	5.59845	5.53493	5.55209	5.25226
APITD1	3.91794	3.93382	5.46947	3.64705	4.85897	4.60129	3.96562	4.36335	4.76062	4.25311	4.75556	5.09669	4.04876	3.20461	3.89371	5.6562	3.0093	4.42209	4.48454	4.90304	4.26817	5.48508	4.11228	4.21535	4.44918	3.97229	3.10075	4.5696	4.71164	4.42896	4.69875	4.98402
APITD1-CORT	3.27756	3.88462	5.27553	3.36642	4.20637	4.2676	2.95942	4.28391	4.26294	4.33363	4.33869	4.65089	3.76622	2.54549	3.81099	5.38392	2.40508	4.07319	3.47574	4.17663	3.60539	4.43384	3.11241	3.67318	3.54628	3.09328	3.23588	3.82613	3.87537	4.48132	4.30783	4.34083
APLF	0.388709	0.637179	1.26627	1.22401	1.16436	0.518539	1.89822	0.78976	0.758111	1.15394	1.24544	0.404167	0.592466	0.583607	1.13268	0.956407	0.370174	0.885928	1.11769	1.3316	1.20808	1.42485	0.646204	1.41427	1.37424	1.50003	0.77321	1.09485	1.26151	1.34628	1.22141	0.557312
APLN	2.12156	3.37645	2.2879	3.7947	1.57799	3.84155	1.50708	0.836461	1.90361	2.68344	2.41221	0.5533	1.40861	1.50484	2.18325	1.61323	1.64238	1.61134	4.21322	0.769939	3.62677	2.31955	4.15848	1.21077	3.71358	3.21646	1.90255	3.04274	1.82163	1.52139	2.48147	1.56738
APLP1	1.29282	8.10643	6.18756	6.54276	5.63569	6.90052	5.90951	4.82937	7.52619	8.048	5.14756	6.29247	5.74526	6.72848	7.26808	6.80406	6.3472	7.06315	5.57058	4.93995	6.19804	6.1963	6.48988	6.39214	6.37142	6.33734	5.93821	3.99281	3.94891	4.43672	5.87424	7.12932
APLP2	6.01564	5.3565	6.69213	7.9662	6.73402	7.46073	5.46285	6.7129	6.30458	6.28696	6.93352	6.77518	6.45816	6.60951	7.21288	6.80978	4.56853	6.28438	8.07214	6.83505	7.67213	6.0168	8.10093	7.48584	7.4712	7.37228	7.09092	7.40071	7.30783	7.08425	7.46302	8.93975
APMAP	5.95987	6.84892	6.70997	5.7293	7.1688	6.94131	5.61725	5.72324	6.46347	6.80581	6.87993	6.503	6.507	6.82773	6.42936	6.66169	4.62355	6.91049	7.07446	6.55826	7.31121	6.56473	6.50998	7.48061	7.07071	7.20854	6.5368	7.05251	7.53204	7.25263	6.65739	6.52951
APOA1	0.76059	0.678947	0.519639	0.486282	1.09898	1.39844	0.200488	0.414404	0.363505	0.487204	0.886592	0.336053	0.524811	0.646776	0.601842	0.86623	0.100811	0.621332	0.36893	0.110251	0.107818	0.613626	0.600413	1.11867	0.497204	0.597304	0.31392	0.383908	0.895898	0.657334	0.328732	0.390581
APOBEC2	1.5447	1.61525	0.99133	0.777722	0.436124	1.00492	0.0204032	0.458188	0.21163	0.928219	0.889196	1.20826	1.00039	1.71444	0.319433	0.922954	0.49566	1.31492	0.496699	0.266576	0.191086	1.13243	0.555414	0.330719	0.599867	0.300245	0.562219	0.490739	1.05455	0.348006	0.532471	1.1801
APOBEC3A	0.0928038	0.104095	0.181446	0.292375	0.210449	0.407102	0.502931	0.145756	0.411651	0.160488	0.306014	0.25131	0.308377	0.0655534	0.235694	0.523747	0.00239087	0.31277	0.272795	0.174387	0.114772	0.395503	0.524673	0.18255	0.319688	0.121122	0.208719	0.268374	0.493167	4.11588	0.14276	1.35717
APOBEC3B	0.357834	0	3.26504	3.05493	2.87704	5.88385	4.76626	3.43033	0.259443	3.43703	2.67533	1.27709	2.46834	0.343808	5.21255	2.40699	0.0652035	4.32738	4.6352	1.36424	4.12563	2.07826	5.56174	5.92167	4.44435	4.49516	1.67563	4.58954	5.03982	3.74195	4.1227	5.68355
APOBEC3C	0.156158	0.183859	2.41079	0.377493	0.669448	4.11253	4.47859	2.92779	1.6868	0.757009	2.07276	0.401001	1.16374	0.187096	2.10812	2.4341	0.0550732	3.88125	3.34782	0.435892	3.39332	0.715944	3.54837	5.15311	3.35572	2.96844	2.22533	3.56403	4.19959	0.987079	2.78393	1.36346
APOBEC3D	0.228021	0.470481	1.14847	1.00235	1.17439	2.63634	2.83658	1.52496	0.655447	0.548944	0.893557	0.947195	1.22202	0.879374	0.502221	0.97041	0.151919	1.06558	1.73386	1.56112	2.23663	1.15469	2.2377	2.86528	2.0593	1.71699	0.398178	1.77764	2.25957	0.752946	1.02538	2.35968
APOBEC3F	0.220755	0.738133	3.25888	2.16356	2.60568	3.86879	3.02456	1.91847	2.68252	2.41281	2.30761	2.14425	2.2413	1.06687	1.60484	2.00226	0.0795548	2.60731	2.62252	3.30293	2.99592	1.59052	2.59769	3.42186	2.8173	2.92203	1.71956	2.72621	3.15157	1.35024	2.16692	2.29042
APOBEC3G	0	0.145369	1.71597	1.05649	1.34883	4.40799	3.38346	0.82955	0.217251	2.42166	1.53634	1.61968	1.33082	0.99884	0.318196	1.09629	0.131461	2.36979	2.30022	2.48609	3.56716	0.305817	2.80896	5.46871	3.50379	3.50159	0.944679	3.13974	3.76998	0.0928891	1.62199	1.2939
APOBEC3H	7.33287e-05	0.128037	0.0671557	0.0734201	0.133756	1.02584	0.0813699	0.0446986	0.703426	0.148152	0.0673091	0.0987476	4.33965e-05	2.47528e-05	0.067516	0.000133104	0	0.0698296	0.143278	0.0687743	0.260975	0.173501	0.513949	1.75068	0.395532	0.453516	0.0426477	0.455389	0.858977	0.0586141	0.0788071	0.215361
APOBEC4	0.224924	0	0.218444	0.068417	0.0845446	0	0.0543793	0	0.0231029	0.223192	0.062228	0.0729896	0.0317667	0.0595323	0.0106434	0.169397	0.0433571	0.117629	1.29104	0.0483828	0.519711	0.138351	0.0370234	0.300734	0.719665	0.286383	0.0434742	0.185647	0.351134	0.383592	0.578603	0.063493
APOBR	0.0878679	0.12103	0.208626	0.237268	0.0476999	0.131486	0.0672949	0.414812	0.156102	0.499179	0.0864232	0.153971	0.0985302	0.0781047	0.10751	0.271628	0.0201779	0.266407	0.459987	0.115624	1.60283	1.2699	1.78016	0.164619	1.91921	1.05414	0.0906537	0.158015	0.159214	0.158231	0.0927451	0.1882
APOC1	1.44169	2.79074	1.3715	1.69856	1.17876	2.93788	3.26476	3.92756	1.83716	3.32094	2.37261	1.8563	2.76442	0.506526	3.53461	2.63042	0.498789	2.07701	2.17563	1.42751	3.01477	2.03056	0.834947	3.90685	3.17623	3.71345	1.40282	2.25948	1.52035	0.217304	3.94318	4.3879
APOC2	0.949424	0.76049	1.71411	0.862133	0.909445	2.70261	0.919849	1.52238	1.39261	1.25694	1.75875	1.26665	1.7428	0.662332	0.648842	1.43203	0.349308	1.05985	1.79249	0.397743	1.8121	1.00424	1.69238	1.57325	1.58318	2.17736	1.01623	0.916728	1.52389	0.971607	1.50248	4.22302
APOC4	0.842419	0.905335	0.951104	0.628267	0.807959	0.90311	0.892262	0.542749	0.693258	0.699289	0.741483	0.716569	0.931541	1.20947	0.365926	1.13969	0.326977	0.740541	0.134129	0.337177	0.722591	0.794529	0.611904	1.32826	0.954192	1.22493	0.278656	0.756743	0.592064	0.502365	0.525438	0.994073
APOD	0.440573	0.408626	1.86219	0.376156	0.243805	2.90552	0.326075	2.13871	0.267604	4.76849	3.73868	0.339449	2.86724	0.273497	6.22416	2.57324	0.324306	1.12765	6.11154	0.932378	9.50275	1.1313	4.58373	7.02504	10.021	8.93924	1.04875	0.46232	1.30787	0.293455	6.94086	7.23065
APOE	0.15988	6.06104	3.44837	1.00519	1.01863	3.35797	7.34484	2.8441	3.89641	3.5177	2.06799	2.39546	2.50447	2.8241	1.19797	2.54092	0.58265	1.96397	0.913232	2.34779	0.943972	3.59308	0.665232	1.47012	1.05571	1.03829	0.317506	1.27786	1.25277	2.77009	1.53812	4.9566
APOL1	0.252043	0.467088	0.600695	1.58997	0.557027	5.10021	1.2462	2.88543	0.645614	0.586293	0.700038	0.440222	0.681382	0.337305	1.70834	2.27472	0.193747	1.98452	3.19628	0.439758	4.01944	1.14405	3.52834	3.69881	3.66672	3.59137	1.16663	1.43741	1.57389	0.519214	3.12189	3.82639
APOL2	2.99668	2.3893	4.14657	4.00202	3.6685	5.3671	3.99376	3.40819	3.24464	3.2116	3.66959	2.83482	4.31092	0.413084	3.51676	3.92047	0.953864	5.02635	3.64849	4.43096	3.83948	3.40376	3.91865	3.73035	3.66437	3.95947	3.5105	3.20621	3.15528	2.25216	4.04953	4.53284
APOL3	0.0555073	0.0713017	0.103688	1.47964	0.475156	2.69551	0.572306	1.08802	0.122088	0.954803	0.649837	0.023273	0.51159	0	0.0360642	0.820429	0	0.187685	2.47305	0.171374	3.43681	0.15093	3.17638	1.92113	2.76966	2.91065	0.647383	0.296065	0.351161	0.122681	0.872837	2.27926
APOL4	2.38786	3.50221	2.60453	2.67437	5.95243	2.34821	2.50943	2.9273	1.7411	4.81346	2.09964	1.98323	2.71994	1.88854	2.62176	4.54435	1.39789	6.57438	1.92966	5.32389	2.37922	5.23195	3.37417	5.27015	1.76096	1.83657	4.18725	3.11262	4.41121	1.37206	3.56442	2.02632
APOL6	1.03526	0.816866	1.15089	2.46732	0.735631	2.90344	2.02925	1.16265	1.97112	1.25468	1.18361	0.836271	1.86227	0.790209	1.00322	1.18994	0.332066	1.68966	3.66682	1.211	3.88455	1.94739	2.74068	2.81316	3.40112	3.15781	2.30424	2.32189	2.25677	1.40243	2.15725	2.69973
APOLD1	0.84504	2.77174	2.99798	1.72441	1.21481	2.88437	2.75116	3.89483	3.6013	4.54721	2.08097	2.77373	3.2668	2.19293	3.30727	3.32566	1.25312	4.01913	3.68025	1.59181	4.23503	2.57393	4.5196	3.62729	4.30003	3.77468	2.95004	3.46743	3.64676	1.95975	3.53192	1.2634
APOM	1.19047	2.54796	3.07152	1.91078	2.08331	2.47498	1.28229	2.83352	3.11204	3.1279	1.81916	3.36541	3.02714	3.68969	2.15783	3.75222	1.70621	3.07937	3.38975	2.40296	3.27744	3.51833	3.13228	3.47331	3.67213	3.50507	2.15619	3.11383	2.92808	2.03012	2.79169	1.85906
APOO	4.9053	5.83761	5.30484	5.6493	5.5316	4.95093	4.72601	4.44748	5.99294	5.63156	5.19017	5.27908	4.34128	5.69034	5.44741	5.68837	3.71778	5.17782	5.14193	4.52516	5.7604	4.78064	5.03477	5.86804	5.84562	5.63021	4.48242	5.33775	5.24595	4.99343	5.98123	6.04134
APOOL	4.07172	3.30267	4.47017	4.55622	4.35496	3.67788	0.268645	2.98318	3.10948	3.95114	3.83679	4.62598	3.13818	4.11829	2.51818	3.32652	2.29515	2.84434	4.74389	3.34374	4.76031	3.13372	2.22106	3.28439	4.3835	4.34918	2.75373	0.303216	0.302019	3.476	3.83904	4.31596
APOPT1	4.46041	4.69623	5.52305	4.42023	5.42714	5.24663	3.941	4.95315	5.27549	4.52763	4.77834	5.70599	5.31571	3.92865	5.47889	5.26711	2.97576	4.88545	4.70849	4.8664	4.44419	4.94842	4.32588	5.52083	4.18358	4.63709	4.41052	5.02594	5.29529	4.97722	4.84257	3.88288
APP	7.35774	7.72309	8.35833	9.00134	8.23716	7.83443	8.47224	7.2439	6.93601	7.44626	7.30452	7.71898	8.03051	6.93424	7.88384	7.49331	4.96717	8.78987	8.13309	7.91076	7.23361	7.21905	8.7636	9.52514	7.08313	7.35364	6.87792	8.23189	8.40794	7.85462	8.17929	8.3595
APPBP2	3.54497	4.12915	5.65222	4.25259	5.03686	4.39751	3.58303	3.84849	4.53612	4.74638	4.16866	4.77721	4.59085	4.97659	4.08249	4.56911	3.37976	4.15543	4.27019	4.90265	4.34622	4.18044	4.07985	3.83377	4.08766	4.03876	3.23307	4.15647	4.25147	3.45926	4.35463	4.01098
APPL1	4.49245	4.36348	4.62791	4.43945	4.15542	4.33483	4.56569	3.76295	3.68881	4.45458	4.08804	4.43246	3.29897	4.17455	4.72102	4.33418	2.16197	3.93918	5.48072	3.64781	4.99871	4.62289	4.23158	4.85788	4.81638	4.85135	3.00557	4.65795	4.72008	3.06118	4.33835	4.2092
APPL2	4.34528	4.32017	4.94887	4.31501	5.76648	4.96924	4.6924	4.53804	4.63353	4.97778	4.10944	4.58127	5.00137	4.85544	4.40179	4.82171	3.58858	5.20066	5.10272	5.07817	5.13606	5.16639	5.4381	4.99085	5.08563	4.36537	3.79399	5.0758	5.25717	4.08558	5.69597	5.04995
APRT	8.34441	5.99903	6.57504	8.02418	6.18959	6.18653	6.14835	6.97424	5.93408	5.57294	6.5482	6.57914	6.48526	4.50844	6.23713	7.29098	5.63592	5.83816	5.80173	5.56695	5.80177	5.38746	6.52458	5.94899	5.74523	6.06913	5.73192	6.0805	6.52326	7.08883	6.77405	7.41106
APTX	4.40981	4.19301	5.03832	4.32282	4.81694	4.70081	4.52565	3.95626	5.02784	4.59497	4.45941	4.41441	4.36364	4.84054	4.72531	4.76982	2.94179	4.01915	4.5641	4.82561	4.20165	4.55101	4.52177	4.33523	4.287	4.29573	3.55626	4.04043	4.2264	4.59384	4.91323	4.01619
AQP1	0.707685	1.60941	1.34537	1.55401	1.00755	8.90111	0.736599	3.48091	1.41769	1.21546	1.14413	1.20804	0.376078	0.821448	0.525142	1.48422	1.07511	1.37281	1.40155	0.666955	1.34608	1.75721	1.34516	1.30815	1.36118	0.419105	0.471981	1.69079	2.61453	3.83004	0.520886	3.62116
AQP10	0	0.490036	0.0166239	0	0	0.0363323	0	0.173155	1.40639	0	0.0123585	0.012608	0	0.0144122	0.0119033	0	0.142141	0	0	0	0	0	0	0	0.0303474	0.022059	0	0	0	0.0134101	0	0
AQP11	1.71906	1.86338	2.01461	1.61221	3.18039	1.64326	1.66	1.26931	3.20666	1.32184	1.97119	2.01523	1.49152	2.0864	1.08607	2.10939	1.42089	2.11257	1.99562	1.33938	1.49826	1.76214	1.70098	2.41275	1.48299	1.26683	1.13533	2.22497	2.17431	1.8585	1.15926	1.78618
AQP12A	0.18168	0.195155	0.00742604	0	0.0126024	0.126516	0.388387	1.15234	1.94919	0.832645	0.0635845	0.013924	0	0.288845	0	0.647187	0.178342	0.370296	0.18084	0	1.58107	0.958306	0.16764	1.2958	0.140472	3.22981	0	0.428698	0.243082	0.0296365	0	0.445543
AQP12B	0.0494236	0.0673987	0.0787148	0	0.0124734	0.124286	0.0383863	1.35707	1.73736	0.0566864	0.0447246	0.0444215	0	0.587123	0	0.0431024	0.0343566	0.0916999	0.0612993	0	0.816677	0.272881	0.0986451	1.16807	0.0728452	3.09	0	0.148117	0.291708	0.0294305	0	0.212467
AQP3	3.96489	3.15023	1.18043	4.51282	1.84013	1.82108	1.59999	2.35613	4.38982	4.24036	2.63573	0.69075	5.78787	1.31581	2.16061	0.782029	0.77748	1.34818	1.97388	1.28613	0.743473	4.9769	2.34765	1.20246	2.50335	1.13199	4.55532	1.58968	2.43626	8.09949	2.1681	2.22476
AQP4	0.245378	1.77894	1.62541	5.16354	0.680775	0.116687	0.141362	0.132931	3.53329	0.646415	1.26696	0	0	0.779476	0.0427348	0.0284039	1.26483	3.60519	0	0	0.684957	0.368154	0.00802591	0	1.28274	0.149912	0.0171457	1.29851	2.17082	0.627604	0.148436	0.54534
AQP5	0	1.07504	0.314328	0.113164	1.27387	1.63066	0.268252	3.93279	0.124125	1.70358	0	0.463795	0.423037	2.26955	6.17311	2.59022	0	2.35805	0.0847322	0.37018	0.505654	5.18422	0.0819222	0.0836862	0.243606	0.193843	1.19044	0.0438059	0.050379	5.45129	0.860422	1.31309
AQP6	0.283511	0.117565	0.757461	0.134077	0.233346	0.366043	0.352295	0.556787	0.391695	0.977625	0.343898	0.850548	0.536153	0.571562	1.63245	1.20659	0.164016	1.93189	0.319549	0.178154	0.490209	2.08792	0.5561	0.146858	0.552173	0.422247	0.279275	0.511368	0.404843	1.66708	0.416857	0.276238
AQR	2.80407	3.65581	3.37176	3.01511	3.11898	3.13032	3.68476	3.32892	3.49966	3.63125	2.56526	3.31355	3.49098	4.90671	3.16734	4.19073	1.58645	3.86767	4.48465	3.68317	4.1706	2.82785	3.09437	3.73655	4.22464	4.09481	2.90168	3.53116	3.79795	4.31385	3.44618	3.26776
AR	0.0561778	0.319324	0.312845	0.103006	0.236686	0.237828	0.0649485	0.252568	1.16939	0.224115	1.19472	0.153513	0.10473	4.13063	0.0347526	0.183194	0.540177	0.180249	2.82079	0.105179	4.92873	0.385445	0.20307	4.75271	4.93196	5.24302	0.169395	0.137838	0.167008	0.0454038	0.136643	0.123737
ARAF	4.58893	6.00768	5.6899	5.50492	5.66247	5.5561	5.4931	5.18593	5.38561	5.80219	5.10104	5.49862	5.39521	4.77528	5.47809	5.17659	3.77521	4.39216	6.33869	5.10068	6.25131	5.12149	5.18251	5.26678	6.27761	6.12361	4.5618	5.54177	5.47698	5.2186	6.01965	4.94916
ARAP1	5.19518	3.37768	4.8743	4.86496	5.1791	5.12213	4.05231	4.76676	5.16154	4.3978	5.14632	3.96185	5.48315	4.73468	4.20847	5.17144	3.35892	4.58266	5.2487	4.99715	5.43552	4.60426	5.05019	5.21518	5.20173	5.4641	4.18813	5.51808	5.64928	5.32408	4.75507	5.42443
ARAP2	1.58989	1.18522	0.939189	2.11107	0.84156	1.9468	1.16266	0.788515	1.44658	1.57442	1.45684	1.01893	0	1.37958	1.39937	0	1.08857	0.562491	1.23538	1.56138	2.93679	1.97819	1.42047	0	2.94777	2.71586	0.0571762	1.40725	0.733169	1.91001	2.79009	1.36373
ARAP3	0.058556	0.929323	2.24259	0.8362	2.43211	0.774528	3.35033	2.4043	0.495369	0.814368	0.354219	1.11822	0.551781	2.72955	1.50137	1.31353	0.268686	2.63437	1.04549	1.93149	3.14048	2.39885	1.4659	1.63268	3.22383	2.96648	1.59784	2.2574	1.89466	2.14207	1.72299	1.40985
ARC	0	4.05337	2.7033	0.0479877	1.65124	1.91759	3.16016	1.2764	3.78505	2.34699	1.71691	3.33889	1.33962	2.65846	1.45371	2.16358	3.01111	2.71524	2.03857	2.87889	1.53834	2.77319	2.05137	1.51875	1.02246	1.02798	0.129416	0.0713662	0.0928045	0.86519	0.733192	1.00994
ARCN1	6.75442	5.47504	6.40919	6.73427	6.94296	6.91953	5.77025	5.9226	7.07981	6.00409	6.45086	6.13671	6.01523	5.91506	6.34529	6.72513	5.04709	6.25767	6.42989	6.04843	6.22761	5.32358	6.07234	7.3445	6.15569	6.22413	5.67774	6.49018	6.85023	6.38962	6.5826	6.90621
AREG	0	0.598513	0	1.37693	0.258388	2.74857	0.0241344	0.924736	0	0.214321	0.0546509	0	0	0.069044	0	0	0	0	0.228409	0	0.428581	0.097862	1.26569	0	0.904886	0.490331	0	0.372267	0.0571658	3.43197	0.0391949	0.462475
AREL1	3.67331	4.82944	5.49413	4.16584	4.80615	4.5565	4.43875	4.56313	4.90372	5.21331	4.64306	5.65568	5.44877	5.13232	3.49131	5.03573	2.89843	4.25153	4.91476	4.7017	4.7128	4.76731	5.0424	4.52205	4.55066	4.78896	3.3254	4.55357	5.01173	4.63324	4.56117	4.02882
ARF1	8.19091	8.20127	7.99889	8.59531	7.80588	8.23692	7.30055	7.60947	8.44008	8.10576	7.201	7.77514	8.0154	8.00444	8.02573	8.45797	6.97317	8.04937	8.41279	7.45108	8.48519	7.84935	8.13576	8.17944	8.65671	8.41011	8.00411	8.12538	8.55314	7.40163	8.32978	8.46166
ARF3	5.3379	5.71921	6.42795	6.44065	7.27376	6.37719	6.58244	6.40874	6.74612	5.93393	5.47603	5.52716	6.0487	5.77143	5.88713	6.53518	4.95261	6.3791	6.20868	5.63603	6.04749	5.26603	6.02818	6.27244	5.88671	5.58958	5.50458	5.55392	5.84308	6.72181	6.60331	6.51286
ARF4	6.26364	6.67638	6.35855	6.54518	6.07521	6.55409	6.99117	6.22654	6.6448	6.02847	6.29757	6.08431	5.34457	6.44536	6.21181	6.40561	4.83895	5.42244	6.83108	5.63452	6.60838	6.21183	5.86784	6.21288	6.71552	6.74679	5.56148	6.04134	6.30566	5.31788	5.40488	6.64927
ARF5	6.78862	7.44185	6.86217	7.65119	7.59249	7.4906	6.59981	7.31215	7.76555	7.384	6.43612	6.4586	6.93597	6.29104	7.24445	8.05715	5.88858	8.04438	7.30806	7.07529	7.38809	7.51634	7.21771	7.99752	7.44348	7.18113	6.94644	7.55592	7.82354	7.14016	7.23999	7.29646
ARF6	4.79823	5.99544	6.4604	5.32547	5.8173	6.55422	5.32338	6.00005	6.2028	6.93112	5.6597	6.55477	6.99076	6.00268	5.64078	6.17255	4.03481	5.934	6.3545	5.76931	6.28675	6.31736	6.89952	6.79862	5.94422	6.10721	5.16135	6.40484	6.64656	6.41597	6.21203	5.91841
ARFGAP1	5.65369	6.0086	5.40561	4.95727	5.47571	5.22034	5.22088	5.52791	5.93727	5.07429	5.17091	5.96554	4.6341	5.16672	4.06737	5.47396	4.13781	4.65285	5.11435	5.38943	5.09306	5.61361	4.66016	4.43586	5.20532	5.2212	3.44715	4.77407	4.89972	5.64856	4.55899	5.56031
ARFGAP2	6.29905	4.69867	5.58378	5.44814	5.67137	5.33095	4.68369	5.71062	6.1469	4.89089	5.10722	5.35382	5.58497	5.87684	4.78568	5.7883	4.07177	5.1856	5.57647	4.39572	5.42157	5.03187	5.50899	5.71799	5.38395	5.42608	4.29841	5.36526	5.37029	5.92868	5.3338	4.95134
ARFGAP3	4.3108	4.85892	5.63811	4.48474	4.73475	5.98932	4.2627	4.27667	6.28184	4.63935	4.94548	4.81705	4.90942	4.85264	5.36285	5.05974	3.72993	4.83971	4.76535	4.78105	4.92833	5.11105	4.46831	5.01344	5.05566	4.6215	3.27663	4.86106	5.08924	3.79106	5.49581	4.58387
ARFGEF1	3.59258	3.28523	5.07135	5.17829	5.17861	4.54104	3.30494	3.74135	4.72834	3.79628	4.66274	4.2917	5.03364	4.3138	3.8602	3.51954	2.3565	4.27476	3.26883	3.67895	3.32888	3.86712	4.16332	4.14791	3.31952	3.27618	3.11152	3.65303	4.8092	4.04866	4.6052	4.91616
ARFGEF2	4.31177	3.76594	4.70676	3.82151	3.94145	4.14426	3.20281	4.22828	4.28953	3.77798	4.4349	4.51866	3.59499	3.2681	2.96082	4.11273	2.59307	3.63764	4.1146	3.5655	4.06187	4.02158	3.60322	4.7298	3.95558	3.94464	2.46121	3.76757	4.29046	4.49721	4.08735	4.24358
ARFGEF3	4.54945	3.1628	2.89721	6.30423	3.7037	2.97242	2.39071	3.28284	3.89285	4.51752	3.25296	2.53297	3.12973	3.70393	3.45256	3.46918	1.36027	4.55949	4.65522	3.11845	5.01796	2.48247	5.32926	4.40776	5.1614	4.47361	2.90387	2.96677	3.4434	3.98246	4.3416	4.4897
ARFIP1	3.7096	4.16888	4.01218	4.89131	4.30034	3.80444	3.63724	4.29222	3.90442	4.26119	3.2776	3.57632	4.38707	3.70876	4.77751	5.13673	3.52474	3.66716	3.78644	4.36006	4.66145	3.58839	4.74948	3.92172	4.55411	4.26671	3.69202	3.9793	4.12211	4.63531	5.1806	4.19521
ARFIP2	5.77288	4.44466	5.97002	6.05768	6.21109	5.89403	5.87387	5.06286	6.05201	4.87252	5.71599	5.57798	5.70585	5.46686	4.93797	5.90464	4.08005	4.84029	5.60296	5.54816	5.46809	4.90439	5.40719	5.2938	5.38422	5.56854	4.59727	5.73088	6.00375	5.1383	5.46332	6.0886
ARFRP1	4.61938	4.9538	4.74811	4.63384	4.6788	4.74804	4.15416	4.88779	5.1372	4.47553	4.55518	4.69582	4.081	4.5506	3.83284	4.9814	3.77254	3.9258	4.51849	4.56519	4.7113	4.65946	4.47303	4.76461	4.43751	4.56058	3.42012	4.30322	4.4523	5.42556	4.17948	4.5773
ARG2	4.97631	4.20418	5.18098	3.04671	4.28456	5.43385	2.49581	3.13146	5.96494	3.91302	5.06973	5.16547	6.78264	4.6168	3.34895	4.51125	3.35402	3.4449	4.02199	4.65989	3.95005	5.26872	6.2483	3.22125	3.10811	3.63989	4.18199	5.91728	5.84334	2.94255	4.1707	3.38219
ARGLU1	6.86029	6.83337	6.59851	7.06454	4.76231	5.28295	6.06873	6.93715	6.03155	5.89698	6.62519	7.36044	8.07159	7.75336	6.6865	6.66912	6.25408	5.97036	6.13495	5.98112	6.46458	6.71531	6.19409	5.04219	6.42059	6.54888	4.72298	5.51284	6.05938	7.14943	8.63839	5.66845
ARHGAP1	5.58852	4.12477	5.33498	5.38257	5.38209	6.15914	4.4215	4.95082	5.8092	4.82899	4.81927	4.3764	4.73992	4.25507	4.34279	4.80742	4.21815	4.62613	5.10718	3.84178	4.84336	4.50278	5.28134	5.31618	4.69516	4.87623	4.67109	4.78369	5.15782	5.1685	5.18564	4.56065
ARHGAP10	0.943474	2.70312	0.117367	1.32867	2.22329	1.21392	2.3377	0.968217	0.776045	2.54241	0.0611965	0.0606162	0.238391	3.27094	1.61179	0.136101	0.986141	2.94171	2.12238	2.55982	3.19785	2.38898	2.36298	2.24626	3.27827	3.085	0.114932	0.163466	0.0333943	0.839839	0.131226	2.11026
ARHGAP11A	5.09099	5.57404	5.14705	4.94914	5.49356	5.36023	5.63143	4.87419	4.89345	5.41361	4.31459	5.32175	5.60637	6.58537	5.10134	6.12093	3.3702	5.84276	6.23977	6.14754	6.33236	4.57644	5.00035	5.04644	6.28507	6.47224	3.90032	5.20034	5.13009	5.41595	5.68585	4.40098
ARHGAP11B	1.87711	2.71943	2.28166	2.14836	2.31933	2.36996	2.62079	2.39285	2.4373	2.21497	1.91997	2.14148	2.80935	3.968	1.47759	3.09922	0.958665	2.5752	3.27063	2.40082	3.30608	2.26122	2.13805	2.14925	3.19842	3.61439	1.55837	2.51081	2.81089	3.21264	2.6023	2.07382
ARHGAP12	3.70093	3.01526	4.144	3.61896	3.53588	3.94125	2.82865	4.06085	4.2017	3.35651	3.28619	3.54233	3.94428	2.35251	3.12638	4.04638	1.47506	3.73407	4.5432	4.04494	4.73595	3.71383	4.13522	4.30443	4.54414	4.27243	3.96225	4.24146	4.21041	3.55894	4.33409	3.51392
ARHGAP15	0.428166	1.05081	1.71258	2.29568	0.871849	0.896627	0.95211	0.510003	1.28397	0.94896	1.31724	1.33359	1.0188	1.34465	0.413069	0.855322	0.475588	2.98876	0.710913	0.736556	1.10761	1.02054	2.22904	5.21634	1.29058	1.19818	0.285579	1.24981	0.963174	0.942675	1.29902	0.696265
ARHGAP17	3.86008	3.87712	4.53268	4.23191	3.69937	4.24444	4.18399	3.77802	3.59514	4.07495	3.87231	4.07912	4.05663	3.53055	3.17321	4.59302	3.05267	4.12584	4.30741	4.43083	4.20605	3.8057	3.82507	3.66271	4.1622	4.09893	3.38643	3.39211	3.95265	4.61003	4.0324	3.33032
ARHGAP18	3.718	4.61953	0.0930158	4.68641	0.870232	3.57009	3.27187	2.20408	5.92605	0.126821	0.0244842	0.0347932	0.100239	4.59906	4.62269	0	5.1554	0.0839782	0.388402	0.0485859	2.43997	1.32325	2.57886	0.0277395	1.93945	2.17027	0.0474052	1.55367	1.67956	2.17086	5.17638	1.32553
ARHGAP19	3.18323	4.17716	4.25201	2.61395	3.62482	3.6348	3.27531	3.35208	3.57566	3.77935	3.25247	4.23769	4.25418	4.06015	3.86773	4.22671	2.18889	3.70381	4.11447	4.53727	3.54744	3.7763	2.44787	3.0893	3.55149	3.35371	2.3968	3.03392	3.42257	3.76907	4.39193	3.45535
ARHGAP19-SLIT1	0.71867	0.720679	0.946932	0.819626	0.744388	0.226158	0.24096	0.431915	1.007	0.24569	0.607992	0.437567	0.583257	1.48997	0.167372	0.388126	0.272254	1.25291	0.360964	0.685775	1.15556	0.0845794	0.165392	1.4035	0.400795	0.615525	0.192015	0.835924	0.939362	0.059431	0.323012	0.0691623
ARHGAP20	0.0244997	0.901148	0.324774	0.0527553	0.61568	1.32947	2.59378	0.671728	0.0959818	1.73063	0.725602	0.104394	0.848431	0.783196	1.86684	0.93436	0.506734	0.937277	2.43036	0.139217	3.48935	0.737027	1.55588	0.188847	3.75214	3.78414	0.622049	2.20502	1.44296	0.0669286	2.80548	0.914021
ARHGAP21	1.90527	4.34073	3.94374	3.69265	4.36749	3.92832	4.65884	4.47398	5.54684	4.47282	2.72214	3.48166	4.65555	4.23024	4.07376	4.61297	3.73937	4.08049	5.40302	5.08491	5.2025	4.44214	4.89362	3.74466	5.07044	4.77691	2.8937	4.49721	4.49101	3.86691	5.10047	4.0286
ARHGAP22	0.105739	1.84975	0.56943	0.876239	0.657252	3.67903	1.07265	0.850603	0.689887	2.29875	0.214054	0.485278	1.67461	0.6326	2.6727	1.34874	0	2.21688	3.10729	0.0821206	4.22301	4.12756	3.58125	3.54664	4.21425	3.65592	2.31377	3.63877	2.88764	1.30624	3.4916	2.28736
ARHGAP23	3.95886	4.68907	3.55755	3.02761	4.53376	3.62071	2.9633	2.5365	2.90348	2.73625	2.75805	3.35105	5.39615	3.55894	4.21545	3.82358	3.19895	1.65401	3.94527	4.0525	3.91517	2.5334	4.13167	0.161365	2.66175	4.66273	1.16527	2.4744	2.54709	3.54418	4.93115	2.75825
ARHGAP24	2.45995	0.26454	2.48483	0.463047	2.73375	0.328504	1.77809	1.4181	0.0379868	2.30804	3.07107	1.6142	1.04417	0.894139	0.00492817	1.64726	0.370502	0.0305858	1.15906	3.19863	2.77308	1.07523	0.62422	2.85082	1.79337	3.81834	3.17644	1.43477	1.10284	0.845431	0.0587274	1.05169
ARHGAP25	0.0634676	0.103478	0.580986	1.58655	0.51368	0.862279	0.753045	1.05177	0.047714	1.15744	1.23506	0.208618	0.695635	0.0170174	2.30624	2.10614	0	2.37278	1.81471	0.0577223	3.06375	2.60496	2.66937	3.77226	2.85781	2.7942	2.01465	0.568942	1.91786	2.88625	1.99313	1.16615
ARHGAP26	0.533334	2.19749	2.34565	0.860226	1.72576	3.07619	2.07021	2.39156	1.45157	1.62399	1.83665	1.78131	2.10567	2.30441	1.27449	1.57197	0.949771	1.95352	1.84678	1.344	2.42834	1.48928	2.02119	1.76548	1.62843	2.43196	1.20097	1.38859	1.83692	1.14126	1.45135	1.29091
ARHGAP27	2.34183	2.08361	3.69145	2.17849	2.48152	3.7403	0.860455	4.27995	2.70654	3.14031	2.56881	3.36168	5.4198	3.24697	2.8415	3.39699	1.10376	2.84444	3.66555	3.17581	3.73246	3.10913	3.85541	3.12136	3.40063	3.57846	2.16935	2.60748	2.87149	3.35098	3.0548	3.0802
ARHGAP28	0.31876	0.528802	1.1817	2.99079	2.51308	2.93584	1.61202	1.23875	0.89678	1.20214	1.64528	1.67628	0.535049	1.44243	3.07794	2.44215	0.597836	1.41605	3.06637	1.73514	3.38546	2.34453	2.49765	2.88062	2.80321	2.49674	0.383439	3.33773	3.69135	2.38649	1.84429	2.06877
ARHGAP29	0.0599671	1.78843	0.556415	3.68483	2.91807	0.770176	0.798595	1.03749	0.658044	3.64737	0.257978	0.124506	2.87643	0.0781597	2.03667	1.00203	0.628251	2.65891	1.98728	1.76837	1.51085	3.36377	1.20507	0.396119	1.52313	1.29526	1.15787	1.71448	2.52167	0.182539	2.75645	3.45378
ARHGAP30	0.529202	0.45528	2.20739	1.68682	0.811531	1.42514	0.530531	1.0544	0.660517	0.748062	0.86447	1.3136	1.11793	0.812356	0.360893	1.45628	0.993524	0.489692	0.916022	1.57884	1.0023	1.01309	1.53929	0.246942	1.07437	1.08239	1.07974	1.08858	1.0375	2.67448	1.26864	0.626204
ARHGAP31	0.0870603	0.14472	0.203241	1.20648	0.341136	0.217656	1.01723	0.242026	0.143335	0.230371	0.12189	0.0464623	0.152693	0.221784	0.102154	0.194567	0.160285	0.0646304	0.259268	0.150894	0.256671	1.05724	0.145559	0.0316083	0.298146	0.155529	0.0830346	0.333264	0.186554	2.19978	0.101304	0.158312
ARHGAP32	4.59479	2.61174	4.4387	5.25075	5.23634	4.35626	2.88086	3.80892	4.56369	3.76985	4.40322	3.97343	4.58427	4.76526	4.49729	4.41683	2.63502	3.82155	4.54482	4.42983	4.27692	3.28531	3.57924	4.6451	4.0117	4.40623	3.55792	4.05248	4.33807	4.91552	5.41698	6.14314
ARHGAP33	4.19711	6.35107	5.69802	4.79557	6.0758	5.81252	3.69988	4.64075	5.52321	6.57338	5.12756	5.91393	5.82248	5.99855	6.12085	5.85309	4.47807	5.61504	6.03417	5.22452	5.9878	6.05296	5.42667	4.59393	5.97389	6.22611	4.05754	5.1169	5.10112	5.03583	6.11956	6.95096
ARHGAP35	4.57701	5.31365	5.38277	4.95653	4.92306	5.64758	4.08583	4.36887	4.98666	5.95569	4.76236	5.30702	5.10184	5.15638	4.7076	5.50452	3.50368	4.97535	5.78875	4.9359	5.91539	5.14804	5.15427	5.43967	5.69946	5.92586	4.02374	5.90292	5.81941	4.60702	5.68602	4.16137
ARHGAP36	0.0348207	0.620073	0.392448	0	0.0229092	3.25602	0.0178927	0.176003	6.55539	0.463231	1.15926	0.223133	0.0258059	4.93993	2.09763	0	0.841619	0.019422	0.0226294	0	0.038852	0.0312114	0.117408	0.528249	0	0.23161	0	0.269845	0.0488961	0.339868	3.43083	0.0885874
ARHGAP39	1.61297	3.66465	5.50876	3.56067	3.1637	3.97361	2.97695	3.44409	4.16794	3.32986	4.85973	5.44806	3.05096	3.17371	2.97651	4.32543	2.90177	3.77001	4.45153	2.97749	4.40828	3.74674	3.21199	3.63683	4.48631	4.14356	2.19957	2.4858	3.38797	4.04407	3.82459	4.77235
ARHGAP4	5.20754	6.17014	4.36168	5.37703	3.92421	5.78985	2.38184	5.2566	5.52223	4.96422	4.24757	5.38295	5.11011	3.22502	4.01998	4.54202	3.57063	4.86386	4.91943	4.03909	5.08774	3.77739	6.81666	5.12811	5.24449	5.9973	4.23436	2.94657	3.45585	5.09911	4.70557	5.32265
ARHGAP42	1.31168	1.19727	0.111781	0.130692	0.334463	1.90487	3.75941	1.97478	3.14502	1.9524	0.126248	0.160075	0.365657	2.54727	0.0120729	0.590319	3.20479	3.32137	2.80469	0.0544033	2.22831	1.84836	1.0512	2.63579	2.21301	1.80362	0	3.45005	3.71113	0.273593	1.45498	1.02007
ARHGAP44	0.632916	2.45884	3.29575	1.32857	0.679013	0.546183	1.46806	1.88066	2.12809	2.79577	3.13764	3.04981	2.86749	2.78108	1.55614	1.18647	2.47237	3.25343	1.80131	0.406071	2.6626	3.47485	0.0543575	0.728733	2.44004	1.38376	0.117269	0.221971	0.0491611	2.01769	2.27104	0.105961
ARHGAP45	4.89055	2.26417	2.21799	2.63343	2.41263	3.57841	3.55184	2.07285	2.05554	2.32276	2.49655	2.0989	2.00794	2.18465	2.84078	2.41459	0.999045	2.05665	3.07112	2.29336	2.46754	2.10768	1.38943	2.71338	2.48407	2.67622	1.84573	1.67776	2.15243	2.4774	2.22012	3.94187
ARHGAP5	4.89523	5.24402	6.08691	5.03438	5.79451	5.17867	4.89693	4.34642	5.66133	5.9219	5.25745	5.94088	5.37458	5.22091	3.39222	4.61141	3.30797	5.04789	5.16753	4.53034	5.25549	5.20975	3.96016	5.49481	5.26828	5.24672	4.85338	5.49129	5.46307	3.73305	4.57354	5.09652
ARHGAP6	0	2.05193	0.130183	0.0891204	0.0227933	0.526385	0.0791664	0.167504	1.26339	0.150371	0.394936	0.0070626	0.17254	1.08805	0.272374	0.0264701	0.50925	0.144189	0	0.0429727	0.0171747	0.253597	0.0358574	0.55753	0.0165967	0.0255754	0.225809	1.12249	1.46013	3.61064	0.342185	0.0774981
ARHGAP8	3.49558	1.16408	3.6017	0.266982	3.29343	4.08843	2.5316	3.01665	3.43282	0.198995	3.76049	3.59816	2.81891	0.73282	1.6802	1.96274	0.921771	0.558031	1.82021	2.4796	1.72574	2.6702	2.11192	2.92587	3.02147	1.57238	1.4243	2.15985	2.59162	2.27414	2.95222	3.49798
ARHGAP9	1.40863	3.02118	0.236896	0.110785	0.322671	2.11484	0.968388	0.86538	2.8782	2.39565	1.29602	0.389692	0.517233	3.02576	2.1781	2.15356	2.46085	3.17506	0.836001	0.486991	0.426197	0.477457	0.661385	2.27366	0.17443	0.521526	0.0787288	0.822225	0.990078	0.206638	0.944217	0.71167
ARHGDIA	8.29511	7.8681	8.37721	8.1746	8.42817	7.20022	7.66017	6.91001	7.66757	7.84348	7.22146	8.00165	7.42141	8.4905	7.23758	6.33561	6.5293	6.87091	7.64882	7.77658	7.39108	6.7234	6.85292	6.39613	7.23926	7.55055	7.48379	7.93638	8.26354	7.53199	7.0514	7.93731
ARHGDIB	0.323221	0.180215	1.50874	0.158561	0.131265	0.941252	0.198447	1.87231	0.152265	0.320932	0.039299	0.11433	0.148523	0.64322	0.0158809	0.0899263	0	0.266901	0	0.0850921	0	0.541033	0.106017	0.455789	0.281995	0	0.317376	0.267083	0.217532	1.02182	0.0369176	3.28648
ARHGDIG	4.35321	2.86183	3.33681	5.91025	0.475899	0.49158	3.43337	1.07705	0.777407	0.385014	2.24241	4.70006	2.23648	3.47671	2.99818	2.53668	1.38702	2.50624	1.62541	1.59474	0.242325	0.335341	2.91749	1.70594	0.340843	0.168041	1.84578	0.256997	0.811957	0.537634	1.0072	0.371367
ARHGEF1	5.53908	5.4903	5.12801	4.53022	5.13945	5.12991	5.35176	4.79967	5.06889	5.51514	4.4617	5.61351	5.00961	4.80296	5.04736	4.75246	3.24151	4.63713	4.74851	5.20515	5.16108	5.33639	4.60498	4.45384	5.25132	5.13045	4.09918	4.75648	4.79848	4.62244	5.35298	6.35286
ARHGEF10	0.13183	0.236046	5.1009	0.157642	4.03197	3.12582	2.93269	3.22991	5.45376	0.900532	4.5687	5.30902	2.22697	3.79876	2.43954	3.64796	3.55499	3.1244	1.12312	4.56715	2.75478	2.34656	1.20139	1.2106	1.84363	1.62351	2.52635	2.24552	1.43513	0.464379	3.29498	0.143925
ARHGEF10L	0.745435	4.29049	3.72108	2.99073	2.6539	3.46037	2.54824	4.3082	3.75856	5.14334	1.88673	3.76869	2.93821	3.26319	2.61141	4.92332	2.14666	4.70543	3.72461	3.63369	4.14274	5.22998	5.01095	3.9301	4.12593	3.8059	1.87569	3.35581	2.91584	4.41164	2.67415	3.93206
ARHGEF11	3.47812	3.64961	4.28239	4.36348	4.04189	4.14996	4.06751	4.20319	3.53334	4.28906	3.58527	4.08087	3.35816	3.88201	3.48272	4.39639	2.73916	3.15357	5.59057	3.74502	5.18949	4.52487	3.67771	3.90556	5.17637	4.92847	3.36685	4.11335	4.35599	4.13703	5.08737	4.83014
ARHGEF12	4.02811	3.72897	4.80431	5.61814	5.38806	4.95985	4.8563	4.42508	4.49406	4.78141	4.18693	4.70804	4.91955	4.73603	4.43898	5.01925	2.89935	4.99622	5.80723	5.11778	6.00515	4.5841	5.15406	6.10826	5.78868	5.79176	4.11554	5.72388	6.05787	5.3609	5.59995	5.30543
ARHGEF16	0.632453	3.74053	4.85886	3.55632	4.31378	5.17755	2.5956	5.67775	4.56604	5.7436	4.01366	3.45231	4.21683	0.727886	4.28987	5.60414	0.885531	4.16175	4.81726	4.92331	4.82069	6.13187	4.92365	4.80883	4.55597	4.69036	3.51065	4.54051	4.45857	4.94266	4.60764	5.23062
ARHGEF17	0.601624	3.06651	3.8016	0.866202	3.37884	2.48088	3.22162	2.45942	4.89779	2.48018	3.28661	4.52195	0.999098	4.2746	1.1788	2.14596	3.53419	2.14924	2.41845	3.20956	2.4192	3.76751	2.66737	3.11013	2.67592	1.60132	0.462258	3.06736	2.77258	3.32459	0.485412	1.29861
ARHGEF18	3.14607	4.1187	3.98262	3.60534	4.03769	4.009	2.93008	3.9293	3.78058	4.70475	3.44508	4.08572	4.04446	4.17435	4.47465	4.14522	1.89285	4.40522	3.97985	3.52629	3.75625	3.77739	3.35206	4.05455	3.61762	3.76283	2.92458	3.97211	4.25734	4.00342	4.21933	3.69827
ARHGEF19	3.12662	5.03637	6.32715	4.279	5.67851	6.1821	2.87434	5.57665	5.39397	4.70222	4.61686	5.75676	5.58858	2.53172	4.21766	6.59005	2.60012	5.44755	4.39721	6.73584	4.59148	6.39583	5.9893	5.89767	4.83215	4.29795	4.70167	5.13466	5.90605	6.64747	4.34539	6.08724
ARHGEF2	4.39464	5.78492	5.66205	4.98572	5.82738	5.91871	5.1595	5.32535	5.56552	6.01625	4.65821	5.46713	5.78805	6.22379	5.45072	6.20956	5.35006	5.82681	7.0729	6.55316	6.60502	6.31662	5.62992	5.73592	6.71623	6.25723	4.99151	5.85103	6.12949	5.38532	6.09137	5.93609
ARHGEF25	2.22504	4.78616	3.44902	3.33079	4.1111	3.64219	4.84314	2.12069	4.71554	4.2977	2.91581	3.22786	3.58417	5.25818	3.17154	3.70832	3.77135	3.97226	2.33302	4.14372	4.05371	3.82391	2.73878	4.01235	3.92648	3.96235	2.74149	2.9083	3.28384	3.19512	3.76242	3.36774
ARHGEF26	3.0593	2.40707	5.33271	2.14787	3.70882	2.67758	2.22283	2.97278	2.24128	4.388	4.88136	6.6553	4.48411	1.98845	3.30336	4.44429	1.06363	5.17306	3.23996	4.1713	3.49451	3.71827	3.27394	4.91896	3.00958	3.03695	2.4752	3.55935	4.24878	1.91489	3.82287	3.24485
ARHGEF28	2.75186	2.12342	1.40708	1.5836	1.94411	2.91964	3.32886	2.75217	3.59277	2.90737	1.89466	0.556495	3.23957	2.91316	3.34746	1.73406	2.40974	3.98388	3.78334	0.711708	4.61913	1.78013	3.93462	2.63315	4.45419	4.31366	2.54184	2.62963	2.85056	3.57888	3.47149	2.88963
ARHGEF3	2.68013	4.20351	1.77008	1.59075	2.1936	4.10703	5.37335	2.58278	0.766868	4.80714	3.08355	1.57042	1.52233	0.943174	3.63616	2.48425	0.686148	3.79397	4.94849	0.858163	5.0194	4.23851	3.38163	4.54286	4.48918	5.21061	1.28633	4.06441	4.51288	1.35985	2.65813	2.45258
ARHGEF35	2.91201	0	0.156318	2.6576	2.12115	0.0921158	0.122512	1.69097	2.91059	2.82165	0.0464687	0.115129	0.442902	0.398311	0.225267	0	0.044338	2.10925	3.68525	2.30059	4.0881	3.05368	2.25135	2.29477	3.80201	3.11814	2.87463	2.95455	3.21726	2.73003	2.09372	3.66922
ARHGEF37	1.57946	1.41961	0.623073	2.60275	2.34613	2.62129	0.477845	1.30668	0.75207	2.49684	0.396601	0.122064	1.11969	0.223191	2.49603	1.8129	0.153329	1.01768	3.53276	1.84445	4.49735	2.98194	2.51344	1.69307	4.31211	3.84613	1.75615	1.52108	1.42893	2.24329	3.07377	1.15344
ARHGEF38	2.27279	0	1.24358	2.88944	1.51898	1.33054	0.00563344	0.814531	0.498892	0.711464	1.37957	0.11628	2.92029	0.0323084	2.88617	0.330822	0	0.625914	1.51346	1.80409	0.650185	2.15698e-05	1.88072	1.57649	0.452935	0.751809	2.26576	0.632831	0.775187	2.1977	4.09508	2.43332
ARHGEF39	4.22388	3.65956	4.56249	3.05649	4.13661	4.1869	3.17498	3.53209	4.71248	4.2101	4.21102	4.31069	4.04152	4.04658	3.56642	4.63948	3.22862	2.47935	4.68615	4.79398	4.3706	4.17093	3.89297	3.86339	4.41404	4.02671	3.51767	3.87727	3.88382	3.69178	4.75671	3.52558
ARHGEF4	0.037087	2.29376	1.8836	1.53648	2.41295	2.71291	4.45002	3.45132	2.75068	2.77346	2.00304	3.03647	0.335049	3.194	1.51924	3.05363	1.49645	4.48538	1.97021	0.151212	3.81231	3.17342	3.98348	4.14313	4.01188	3.30889	0.0608609	0.330849	0.531996	5.53313	3.11106	1.0804
ARHGEF40	0.217306	2.0725	4.37969	2.16882	2.41406	4.95229	4.9784	3.27163	1.75189	5.73233	1.8864	3.21502	4.49146	3.00728	4.18064	4.43883	0.419622	3.8715	4.06553	3.09083	5.30381	4.40083	4.42981	4.5671	5.26777	4.93307	1.4927	3.90061	3.26593	3.16189	4.35742	4.26157
ARHGEF5	2.80395	0.082065	0.759288	2.13336	2.87485	1.54402	0.176878	2.33618	4.49016	2.95199	0.101109	1.41573	3.20506	0.779804	2.50023	0.0203764	0.0199776	3.66153	4.75278	3.89924	4.9686	3.54974	3.27798	3.83161	4.71616	4.17674	2.66468	3.41914	3.75646	3.56864	3.12627	3.46962
ARHGEF6	0.207519	2.92468	1.03082	1.41171	0.967384	2.22987	1.84345	0.437406	2.82779	2.39869	1.0284	0.707327	1.81917	2.83189	1.85932	0.474937	1.13873	1.4715	2.1023	0.814552	1.9528	1.64215	0.488819	0.370903	2.07955	2.20414	0.36823	1.3796	0.483307	0.176064	3.2524	1.11031
ARHGEF7	5.56473	5.6205	6.42699	4.60934	3.90261	5.52723	4.46315	5.30574	5.91642	4.81748	6.10502	6.05431	7.10546	6.49732	6.14481	6.34874	4.86844	5.1641	5.53106	7.09904	5.5683	5.0344	5.00496	4.91662	5.18622	5.22205	5.36417	5.04541	5.48973	4.91634	6.64538	3.58013
ARHGEF9	1.8489	5.77097	3.96062	3.60323	4.18607	0.839877	3.87903	3.28845	4.92716	4.71871	3.58095	0.895132	4.10218	3.2763	0.716981	3.10724	3.58818	0.67499	4.06845	3.98359	4.16932	3.30601	0.83993	0.68168	3.99107	4.06126	3.26672	0.703804	0.638416	4.41261	1.0012	3.10878
ARID1A	4.89376	5.03122	6.47311	4.71182	5.94513	6.26673	5.10036	5.10603	5.75724	5.80123	5.23801	6.63492	5.45641	5.32514	4.60921	6.28995	4.04388	5.37616	5.85379	5.72464	5.65444	5.96176	5.85689	5.64039	5.63645	5.2547	4.77274	5.98632	6.04114	5.16172	5.23498	5.65493
ARID1B	4.96607	4.35581	5.61075	5.24775	5.00019	5.61915	4.09751	3.9628	4.74164	5.04704	5.49986	5.67921	4.69678	4.81638	4.53881	4.99733	3.10402	4.52193	5.15522	5.28594	5.10547	4.25469	5.33559	4.80697	5.10058	5.13485	4.31729	4.72662	4.87655	4.93416	5.24569	4.43635
ARID2	3.25319	3.96165	4.5552	4.09911	4.7646	4.77945	4.1281	3.78847	4.21531	4.35892	3.48392	4.5181	4.07292	4.73943	3.79238	4.40493	2.47424	4.6466	4.38195	4.63911	4.40623	4.13115	4.32894	4.39843	4.3374	4.07658	2.82784	4.12262	4.34058	4.40051	4.69854	3.83222
ARID3A	4.0768	2.802	2.56657	3.74604	2.31711	2.86681	1.77113	3.44134	3.25117	2.63492	2.32966	2.93004	3.03883	2.25484	3.72541	3.19676	0.441902	3.44555	1.91601	2.64281	2.10107	2.49748	2.81117	2.59346	1.05074	2.22786	2.24911	0.300582	0.760638	3.494	3.7968	3.39695
ARID3B	2.83413	4.27508	2.70368	2.93869	3.28763	3.01593	3.0836	3.65217	3.6126	2.61624	2.52034	3.49924	3.59207	3.66659	2.47015	3.85852	2.23425	2.91928	2.64577	3.33596	2.26039	2.92086	2.54512	1.85056	1.97174	2.02924	2.04354	1.48731	1.92545	2.68927	2.59308	2.01721
ARID4A	2.02195	3.02584	4.13016	2.61705	2.95043	3.40715	2.49063	3.00666	3.04443	3.6686	3.13855	3.9551	3.80012	3.00636	2.48173	3.1346	1.61323	3.33283	3.17857	2.97782	3.60225	3.33941	2.98888	3.37563	3.49307	3.25041	1.71785	3.26667	3.57781	2.85841	3.88738	2.2634
ARID4B	3.18714	3.8061	4.26907	3.84187	3.88886	4.40812	3.25739	3.18599	4.03328	4.23535	3.0038	3.74643	3.54662	4.04075	3.2277	4.52517	3.18233	4.16517	4.87207	4.12408	4.74877	4.76998	4.14672	4.14717	5.04437	4.36367	3.10207	4.30848	4.59706	3.1348	4.22036	3.62546
ARID5A	1.6963	3.32169	2.16981	1.64538	1.54084	3.11597	2.10417	2.22411	2.98258	1.46938	1.98291	2.11	3.17812	4.80105	3.08733	2.28496	3.03681	1.6894	1.50898	2.35278	1.81831	2.11731	1.9897	2.07645	1.84311	1.7219	2.07854	1.37451	0.826057	1.50131	1.9534	1.09948
ARID5B	1.92629	1.33975	1.26589	2.17612	2.81919	0.369274	1.54752	1.11759	0.343092	1.72595	1.34449	1.7463	2.70081	0.55284	0.406989	0.10057	0.437619	0.745842	1.44215	2.09161	0.786406	2.32301	0.316623	1.31846	1.2485	0.990866	1.23586	1.12262	0.820325	3.47916	2.33201	0.86494
ARIH1	2.08845	2.97858	2.76788	2.5457	2.62121	2.57878	2.48115	2.87111	2.69067	2.72348	2.20775	2.54914	2.91954	3.57701	2.27451	3.12355	2.266	2.80264	3.37754	2.75297	3.4088	3.21519	2.59888	2.44886	3.31769	2.98268	1.60866	2.62	2.78393	3.7321	2.84982	2.49425
ARIH2	4.61625	5.12353	4.85854	4.94843	4.6561	4.55281	5.42783	4.44771	4.70894	5.15762	4.38708	4.75553	3.9396	4.73753	4.41602	4.96304	3.24939	4.12593	5.74627	4.22263	5.70584	5.55133	4.41734	4.75737	5.68669	5.82385	3.49792	4.62173	4.8916	4.53647	4.96334	4.75881
ARIH2OS	1.62855	1.91386	2.09681	2.1417	1.74915	1.43079	1.36636	0.919109	1.58065	1.45288	1.88664	1.79014	1.67309	1.44042	0.900612	1.41265	0.95665	1.01569	1.7078	1.48712	1.92892	2.13793	1.56298	1.10735	1.78659	1.72977	1.19218	1.49494	1.33645	2.04502	1.62261	1.57323
ARL1	5.6005	4.97921	5.7883	5.70186	5.52161	5.46842	5.27054	5.02364	6.07169	5.24218	5.63619	5.24295	5.24549	5.20656	5.67586	5.4061	3.53885	5.40594	5.55398	5.03161	5.45394	4.77489	5.13022	5.83064	5.30808	5.16716	4.84743	5.29893	5.46824	5.84686	6.41815	6.7052
ARL10	2.21504	2.90433	3.37483	2.73839	3.52463	1.5484	4.05776	0.83953	2.27211	2.29142	2.68718	3.47559	2.42786	4.08386	1.62327	1.16166	3.22564	1.86603	1.21589	3.15142	1.33202	3.01325	0.584367	1.53506	1.2205	1.63748	0.353681	0.427511	0.66681	0.442983	1.6418	0.541474
ARL11	0.729943	0.29894	0.14946	1.93483	0.162953	0.140663	0.215997	0.180967	0.188504	0.104448	0.349525	0.275694	0.508136	0.258293	0.108211	0.0796591	0.153529	0.20196	0.228555	0.0587988	0.179118	0.242488	0.215262	0.203689	0.255438	0.167174	0.135514	0.156921	0.278392	0.449696	0.431534	1.48913
ARL13B	3.09232	2.91695	4.67301	3.48697	4.00169	3.79248	3.16756	3.43013	3.65654	3.51666	3.23769	4.24959	3.21551	3.22649	3.80212	5.43278	2.13984	3.84465	4.00743	3.9101	3.95978	3.29515	4.1184	3.1471	4.02949	3.65516	2.7455	3.73952	4.04381	2.9321	4.11642	3.99999
ARL14EP	4.20447	3.38947	4.12007	4.47317	4.74292	4.203	4.37856	3.56937	4.44854	3.68036	4.46795	4.28024	4.17605	5.0515	4.00205	4.17933	3.53447	3.77192	4.25854	4.0871	4.38731	3.39959	3.72641	4.08793	4.28229	4.32671	3.00771	4.30174	4.27601	4.27083	4.42989	3.7799
ARL15	3.29891	3.11803	3.77967	3.43867	4.64573	3.97541	3.52019	2.91866	3.86771	5.37778	3.3678	2.95981	4.61704	4.32684	3.18237	3.95598	3.10315	3.32008	4.93443	4.29178	5.61648	3.72717	4.62295	3.53033	5.83798	5.28761	4.25858	4.00757	3.75426	4.19161	3.40555	3.34583
ARL16	5.61121	5.63964	6.57874	5.71346	6.62077	5.35262	4.93799	5.07385	6.23993	5.70169	5.34053	6.11285	5.9286	6.52862	5.37346	5.42252	5.6539	5.61611	5.4217	6.41282	5.42473	5.50487	5.56974	4.68384	5.33114	5.51858	5.83909	6.14576	6.72487	6.10557	5.52744	6.15734
ARL17A	2.28638	2.18395	3.80882	3.04456	3.56189	4.97889	3.13918	3.22538	3.89566	3.79082	3.51691	3.79568	3.89995	3.88882	4.49579	3.35528	3.15157	3.73192	2.49405	3.80785	2.43212	4.58904	3.79134	2.63029	2.83372	2.65157	2.50126	2.70879	2.67953	4.09455	5.46264	3.68291
ARL17B	3.60422	4.16603	4.96689	4.57705	4.74172	5.38329	3.49499	4.17143	4.85736	4.85449	4.18531	4.79423	4.95401	5.04243	5.01917	4.53465	3.80434	4.30935	4.52605	5.11317	4.56245	4.62868	4.94157	4.77234	4.68663	4.52012	3.37823	4.04104	3.84011	4.23734	5.73571	4.44767
ARL2	6.23355	5.83448	5.84076	5.98598	5.66481	5.28158	6.18838	5.70884	6.0658	5.5346	6.21611	5.84603	5.90856	7.0976	5.00025	5.71788	4.05245	4.46409	6.39172	5.1531	4.908	4.79934	5.19982	5.35965	4.99433	5.229	3.73644	4.97075	4.90659	6.17993	4.84795	5.11556
ARL2BP	5.2661	5.19949	5.50689	4.70867	4.7999	4.21031	4.00755	4.76457	5.35005	4.933	5.18979	5.12146	4.0771	4.90781	5.44742	5.89516	5.05456	4.67285	4.65902	4.32492	4.90127	5.07614	6.09308	5.52694	4.75377	4.68449	3.74431	5.02992	5.5069	3.32447	5.68249	4.63732
ARL3	3.25654	4.49113	4.25276	3.9135	3.69542	3.43768	2.64603	4.16701	4.41865	5.20461	3.54045	3.95985	4.1155	4.42916	4.43899	5.53618	3.02327	4.40492	4.65075	4.58488	4.3353	4.22286	3.25013	3.72038	4.234	3.97666	2.43464	3.74795	3.73121	3.51005	4.66838	3.79858
ARL4A	3.81485	5.08157	4.0012	5.10168	5.36533	5.82059	3.34871	4.28112	6.16539	4.64659	3.91103	3.75692	4.15585	4.2498	5.06078	4.5806	4.86399	3.96047	5.3273	4.26436	4.90856	3.64889	4.98819	4.63766	5.16602	4.66335	4.13302	4.62016	4.80914	3.0446	5.65234	4.89559
ARL4C	1.7478	5.63851	5.87822	4.63659	6.67426	6.87004	6.14317	4.4164	5.51408	5.18229	5.24963	5.4555	5.64897	5.28847	7.15905	5.91781	3.14917	6.57757	4.81569	5.2827	4.91978	5.44754	5.43431	4.97201	4.26046	5.02492	4.27819	4.5309	5.79229	2.05022	7.35053	3.51745
ARL4D	0.71868	3.93683	2.28681	3.10466	4.50168	2.50352	4.46115	2.33124	2.74828	3.8617	0.560925	2.49963	2.19547	2.81449	4.27747	2.92324	0.699651	5.04192	2.73893	4.21617	2.39659	4.31313	3.45173	3.24038	2.51675	2.31017	1.24741	1.41907	2.77946	1.66488	4.21664	1.6907
ARL5A	4.43217	4.08671	4.55582	4.35362	4.49611	4.76028	4.92491	4.28732	4.45708	3.51409	3.82295	4.50784	4.3296	5.07482	4.76657	4.20753	2.36596	4.34119	3.86655	4.2371	4.93102	3.54111	4.44711	4.50242	4.57946	4.43888	3.55136	4.03696	4.23893	4.66462	5.25356	4.38349
ARL5B	3.80169	3.75991	4.47151	4.96172	4.20303	3.82712	4.62066	4.36908	4.83488	4.56263	3.8316	4.32776	4.38464	5.104	4.78782	4.74258	3.32884	4.83797	4.58216	5.09425	4.3281	4.42881	4.1797	5.31995	4.20004	3.80057	3.12828	4.87204	5.09472	4.77775	4.91826	3.78324
ARL6	3.5741	2.71975	4.2275	3.94345	4.51691	4.37424	3.13067	2.94461	4.10519	3.07059	3.17261	3.67996	2.88832	3.30637	3.60774	4.5921	2.96693	3.21116	2.81025	3.89504	2.97093	2.38608	3.46481	1.73083	2.89222	2.77769	3.45321	2.90624	2.99725	2.36685	4.03171	2.89525
ARL6IP1	7.23681	7.92782	8.36382	8.2622	7.3851	8.62093	7.91204	7.79791	7.87501	8.39741	7.76767	8.23526	8.37522	7.40003	9.08073	9.17163	7.24631	8.78035	9.04309	7.84699	9.13828	8.13013	9.38389	9.1265	9.21613	8.95382	7.74904	8.49831	9.06093	7.44192	9.00646	8.98974
ARL6IP4	6.84949	6.92714	6.8928	6.68234	7.59292	6.49321	6.59973	6.61782	6.96528	7.21698	6.49458	7.21329	6.76725	7.41453	7.27131	7.30447	5.2103	7.03956	7.26669	6.89535	7.46422	6.54477	6.88802	6.7105	7.65939	6.9982	6.19444	6.92688	6.68842	6.81901	7.28871	6.9962
ARL6IP5	4.13147	4.79949	4.81615	5.3849	4.91627	4.98947	5.09775	3.46125	4.94703	4.90714	4.68594	4.49657	4.59338	3.41544	5.91719	3.41208	3.23813	3.21426	5.5845	4.90642	5.82547	5.06795	4.81282	4.71378	6.03798	6.41313	5.48117	4.34678	4.20849	5.24436	5.17692	6.36007
ARL6IP6	4.18128	5.27795	5.81838	5.06182	5.20396	5.47161	4.76486	5.34752	5.06374	4.99996	4.97904	5.94769	5.55651	6.0121	5.73985	6.35605	3.13616	5.05255	4.51491	5.60568	5.07229	4.81598	5.56195	5.80668	4.9053	4.83747	4.82605	5.00443	5.7142	5.36993	6.06009	5.07413
ARL8A	3.60812	5.1961	4.99158	5.38024	5.40315	4.88719	4.52621	4.11197	5.34557	5.24478	3.58024	4.89831	4.74045	5.34689	4.30008	5.43951	4.31834	4.92414	5.55164	5.00543	5.60365	5.68689	5.13784	4.91601	5.73842	5.51598	4.39174	5.14607	5.51804	5.37204	4.48862	5.98867
ARL8B	4.58386	4.872	4.94727	4.99949	4.90134	4.54452	5.06152	4.20372	4.80483	4.52472	4.28611	4.62254	4.16272	4.93564	4.16791	4.33754	3.80383	4.72078	5.43735	3.94687	5.32651	5.13762	4.43134	4.42308	5.36866	5.31241	3.66833	4.51285	4.49619	4.86978	4.7777	5.36957
ARL9	1.05718	1.62161	0.543379	0.594105	2.53482	1.46374	2.79107	1.46617	0.621512	2.08432	0.687049	1.19353	1.16281	1.17771	0.932943	1.88091	0.510778	2.1417	2.24937	1.47187	3.64691	1.73745	1.17336	2.51324	4.0404	3.29102	0.2198	2.15113	2.49929	3.50923	1.23872	0.642211
ARMC1	4.52061	5.04767	5.79476	5.70553	5.84246	5.09907	4.56409	4.69094	5.47084	5.01802	5.37866	5.28342	5.57522	5.36809	5.30166	5.42159	4.14511	5.12641	3.83113	5.14251	3.8258	4.73788	5.07268	4.92047	3.81651	3.74765	4.15828	4.02852	4.74542	5.67167	5.7565	5.51057
ARMC10	5.22406	4.00146	4.07766	4.55773	4.64075	5.08546	5.11797	4.33436	5.10632	3.22464	3.54939	4.317	3.40989	3.93989	4.23516	4.65336	3.10847	4.01651	4.79701	4.07889	4.71512	4.33819	4.91462	5.20353	4.76163	4.19378	3.69598	4.54534	4.83138	4.33136	4.5069	4.62822
ARMC12	0.116042	1.03408	0.511434	0.234791	0.437501	0.451088	1.80668	0.40577	1.43678	0.39552	0.779817	1.071	0.0680014	2.22303	0.0792184	0.867623	1.28472	0.713465	0.096758	0.854532	0.0873809	0.673068	0.405882	0.186703	0.371929	0.107222	0.0767776	0.517515	0.804	0.110225	0.309204	0.0236674
ARMC2	1.51922	1.46866	3.02834	1.96495	2.04287	1.69694	1.59794	2.18989	3.12712	2.23311	2.07206	2.65487	1.99687	1.8852	1.43861	3.09164	2.18407	2.08495	3.15225	1.99345	3.38275	1.97449	1.41703	2.2347	3.59064	3.05671	1.29365	2.17158	2.45459	1.87432	3.07188	1.15785
ARMC3	0.525102	0.0217182	2.16505	0.788846	0.464814	1.00729	0.028416	1.50547	3.87146	1.10118	0.87909	0.491486	0.264993	0.0662998	0.45076	2.93522	0	1.01127	4.53228	0.064417	4.4958	0.569171	1.13023	1.78483	4.7005	3.50941	0.271866	1.42005	1.49248	0.252969	2.32972	0
ARMC4	0.0276807	0.89339	0.0598908	0	0.197667	0.0097951	0.337201	1.0476	5.0204	0.123596	0.00849444	0	0	0.879973	0	2.08633	2.63108	0.112613	0.046728	0	0.258987	0	0.0735703	0.0492402	0.951468	0.0141216	0.00962251	0	0	0.0016027	0	0.0620953
ARMC5	3.32582	3.63833	3.67814	3.14612	3.09982	3.24003	2.78048	3.16131	3.10385	3.51255	3.20764	3.56462	3.44447	2.95732	3.54884	4.05116	2.28364	3.69087	4.11491	4.11716	3.56921	3.26405	3.9264	3.57857	3.38403	3.56918	3.34635	2.85547	3.30201	3.82194	3.2578	4.00548
ARMC6	5.48675	5.58776	5.40933	4.61625	5.46886	5.2198	4.95219	4.51269	5.59921	5.45953	4.93084	5.69815	5.25098	5.82186	5.14033	5.42473	4.07655	5.02977	5.03242	4.97003	4.74394	4.48932	4.2927	5.0665	4.4947	4.99303	4.07402	4.8191	4.52717	5.32487	4.8766	4.06507
ARMC7	2.90427	3.33173	3.82876	3.60405	4.09922	3.30431	3.28164	4.31923	3.43585	3.51546	2.3874	3.64775	3.67929	3.84849	2.81459	4.01622	1.87624	3.27281	3.09024	3.94852	3.38922	3.36477	3.22436	2.70197	3.31793	3.55211	3.33171	3.24549	3.12928	3.72649	2.93743	3.76943
ARMC8	4.63999	4.54826	5.9014	5.55555	5.65562	5.36061	4.70954	4.78547	5.15683	4.88858	4.47854	5.48441	5.11083	5.1872	4.32925	5.50793	3.58956	4.65907	5.15636	5.24125	4.65947	4.827	5.07525	5.22725	4.65699	4.80785	4.51599	5.31812	5.32171	4.73449	4.99716	4.78866
ARMC9	1.28736	2.08346	3.20713	1.75815	2.53661	2.27831	2.09234	2.61946	3.24263	2.40887	2.45649	2.93363	1.40004	2.55255	2.39971	3.62902	2.18397	3.13571	1.97321	2.3014	2.79142	2.51841	2.10253	2.52858	2.76214	2.61941	1.13616	2.14783	2.89462	2.18773	2.78962	5.53696
ARMCX1	2.39269	3.75244	4.60291	3.59765	3.56748	4.4618	0.604895	2.90837	2.32731	4.4136	3.89108	4.35858	3.8955	4.44171	3.99611	4.00799	2.13713	3.54642	4.75691	3.2619	5.28476	3.74778	2.56874	4.00431	5.27175	4.77445	3.26186	5.37875	4.88024	1.33279	4.18278	3.61768
ARMCX2	1.76229	3.54611	5.93484	4.19361	4.04776	4.1867	0.718225	2.5225	2.78635	4.35422	4.91361	6.07556	4.07543	5.12003	1.1601	4.30508	2.49301	3.61067	1.6803	4.14991	2.55636	3.45273	1.22965	4.18973	3.5559	2.6521	3.6344	4.08207	5.34411	0.328739	2.58421	3.36197
ARMCX3	4.43317	5.47239	5.08801	4.86008	4.23854	5.20871	3.72208	3.89767	5.32261	4.85907	4.81462	4.94896	4.15388	4.73091	4.45789	4.12837	3.30562	3.72337	4.80817	4.56495	5.37836	3.97522	0.0101606	3.93926	5.59978	5.04805	3.56792	5.27663	5.38136	3.96792	5.41111	4.41946
ARMCX4	1.8299	2.90291	3.42183	2.57961	2.83252	2.33263	2.1484	1.72014	2.44095	3.76814	2.88944	3.59293	2.50574	2.72215	1.85733	2.46103	1.17429	2.53998	3.98263	2.37762	4.11194	2.88496	1.98315	2.86367	4.14654	3.96997	1.7384	4.10863	3.89369	0.373011	3.02463	1.31555
ARMCX5	3.40281	3.41832	3.74161	2.81562	3.25016	3.02706	2.49569	2.96375	2.75698	3.41816	3.47168	4.40921	3.039	3.70941	3.13726	2.94884	1.80896	2.73484	3.55415	2.62674	3.66019	2.96392	2.41501	3.39389	3.78904	3.7897	1.91825	3.89871	3.95055	3.38741	3.5614	2.63732
ARMCX6	3.5955	4.44556	4.82844	4.26251	3.98251	4.45858	3.08806	3.41613	4.39147	4.14035	4.37959	5.0227	3.94313	3.1841	3.66824	3.71113	2.61928	3.29458	4.11952	4.26798	3.89194	3.92306	2.80074	3.93799	4.31067	3.83424	3.73173	4.59095	4.39837	3.90816	4.41776	4.23284
ARMT1	5.22223	3.53609	4.19537	4.06458	3.34263	3.99271	3.36861	3.21637	3.83917	3.67862	3.87842	4.35333	3.65998	3.77184	4.29532	4.07299	2.71558	3.55832	4.06709	3.46692	4.11363	2.72877	4.43391	4.59123	3.97099	3.73163	3.63262	3.77349	3.80685	3.44357	4.7391	3.96895
ARNT	3.93482	4.21564	4.77754	4.17827	4.55083	4.56601	4.75832	4.1098	4.48783	4.33153	3.83056	4.6438	4.33198	4.25137	4.58252	4.28089	3.44678	3.79256	5.43299	4.25604	5.38435	4.76311	4.33027	4.96928	5.28582	4.85064	3.88546	4.53774	4.90518	3.65353	5.86256	4.63103
ARNT2	0.494675	3.62477	3.61324	3.54466	4.29784	2.35668	4.33232	2.50946	2.52681	4.01853	2.86261	3.41976	4.28446	5.13133	3.75584	4.39796	2.95381	4.39243	3.07748	4.38113	4.94634	3.83876	3.14587	2.70717	3.73189	6.0907	2.2439	2.11773	3.55968	5.1448	3.11517	2.89196
ARNTL	3.50041	2.47436	3.15411	3.22595	2.75755	4.63251	1.07579	3.00401	4.42471	3.49844	3.2693	2.50084	4.18569	2.29972	3.13481	3.41441	2.42662	3.99351	3.81576	3.14128	4.16109	3.18691	4.01632	4.91959	3.75654	3.79859	3.33007	4.24636	4.53129	3.72769	3.94474	3.74577
ARNTL2	3.51862	3.47912	3.54129	3.02838	4.69656	4.58984	3.79346	3.07754	5.14421	3.57025	3.32078	3.46576	3.65791	4.57802	4.28354	3.49636	2.61904	4.87511	4.46682	3.9281	3.98649	2.73516	3.82338	4.70483	2.70017	4.06708	3.12269	4.05742	3.91405	4.65563	4.80425	3.05892
ARPC1A	6.85423	7.17077	5.9106	7.25061	7.66546	7.20636	6.76603	7.05489	8.02182	6.18702	5.8876	5.63541	6.75917	6.65386	6.7776	6.91902	5.74253	7.15383	6.93376	6.57916	6.75111	6.68152	6.72959	7.46289	6.61982	6.35418	6.48098	6.73375	7.15702	6.81566	7.06215	7.43649
ARPC1B	5.88276	3.82574	4.3017	5.85903	5.20102	5.97965	3.96523	6.44496	5.28925	3.77398	4.24039	3.41172	4.63307	2.12094	5.08412	5.55937	1.96226	4.84656	5.6661	3.13928	5.64657	4.10916	5.46273	5.4508	5.1358	4.81134	4.83982	4.58956	5.76547	5.16412	5.72592	6.65939
ARPC2	6.32747	6.59984	7.10995	6.77978	6.88408	7.08218	7.10894	7.36776	7.16092	6.47029	6.78588	6.83477	6.54555	7.22608	6.9764	7.08531	5.5093	6.7441	6.04585	6.63564	6.87964	6.29544	7.62504	7.13384	6.91375	6.76423	6.17194	6.30946	7.02246	7.27507	7.22487	6.6557
ARPC3	7.74541	7.53075	7.69634	7.64967	8.29949	7.81235	7.52219	8.28613	7.98255	7.65256	7.07369	7.57796	7.43809	7.74431	8.34838	7.92451	5.99602	7.80763	7.98985	7.55909	7.75442	7.08158	7.94081	7.78331	7.62816	7.37555	6.93078	7.41643	7.55146	7.87993	8.40813	8.26882
ARPC4	6.23808	5.94819	5.97591	6.2226	5.85716	5.67761	6.2687	5.81753	5.69539	6.06915	5.52965	5.61317	5.2022	6.45417	5.78241	6.05784	4.83576	6.49107	6.63405	5.25384	6.48981	5.98954	5.29652	6.11361	6.33101	6.46041	5.40643	5.74646	6.04851	5.98849	6.15338	6.37739
ARPC4-TTLL3	1.35156	2.21744	1.86294	1.99329	1.65019	1.42334	2.28514	1.65841	1.56108	1.84481	1.5488	1.93405	1.70663	2.03394	0.991224	1.91927	1.50594	2.10242	2.73771	1.25656	2.92808	2.33531	1.92073	1.00447	3.31422	2.75536	1.07983	2.09382	1.72038	1.56569	1.7461	3.19729
ARPC5	7.04395	6.67558	7.16858	7.35131	7.07152	7.10873	7.20899	6.83608	7.65464	7.19374	6.16488	6.69286	6.24993	7.67763	7.04882	7.15669	6.26221	7.10714	8.35306	6.35994	7.56793	7.22825	6.63093	8.23001	7.51612	7.50569	6.46376	7.25628	7.3959	7.8522	8.1322	7.30174
ARPC5L	5.25771	5.75426	6.51597	5.42059	6.08921	6.29178	5.88537	6.14993	6.21701	5.96375	6.1783	6.05945	5.45822	5.89054	5.83011	6.33266	4.23047	5.15992	5.78675	5.91519	5.50233	5.54921	6.30522	6.04789	5.17373	5.27809	5.53545	4.79817	5.05994	6.18343	6.27827	6.72175
ARPIN	2.32603	0.903466	2.71623	3.36273	2.1474	2.86363	2.34914	2.33787	2.16295	1.79524	2.25692	2.09589	2.5245	2.97895	2.38094	1.81661	0.704127	1.68535	3.80395	2.28152	3.90981	2.66464	2.4804	2.42925	3.69953	3.84265	1.79249	2.75935	3.17817	3.33732	3.16959	2.51362
ARPP19	6.26044	6.22054	6.87827	7.02133	6.57551	6.07094	6.69456	6.25899	5.44008	6.52429	6.03824	6.40743	6.85789	7.59272	6.63643	7.64742	4.1339	6.51386	7.32153	7.00229	6.99946	6.67974	5.96394	5.96045	6.78837	6.9838	5.75773	6.20222	6.29369	6.92452	6.9186	5.71881
ARPP21	0	1.45182	0.296357	0.327983	0.0692046	1.95885	0.348964	0.105062	0.264773	0.174045	0.0665202	0.0822653	0.00797772	3.587	0.0100521	0.0305951	1.3152	0.0493745	0.266605	0.0399392	0.597277	0.4069	0.0454511	0.231155	0.334011	0.976462	0	2.09269	2.14462	0	0.214497	0.029808
ARR3	0.331471	0.648847	1.20504	1.03834	0.740671	0.673057	0.718715	0.499821	1.01824	0.779688	1.13956	1.20488	0.822597	0.699908	0.621204	0.435832	0.528825	0.784101	1.03737	0.419077	0.916021	0.961125	0.875484	0.563485	0.861786	0.644137	0.58651	1.06935	0.981665	0.644294	0.573598	0.606133
ARRB1	0.0279122	1.07296	0.80573	2.5187	1.91896	3.63827	3.43374	2.45457	2.06172	1.48043	0.357674	0.903087	0.423785	3.60965	4.80037	1.09531	1.51755	2.00092	4.94983	0.569375	5.34079	1.8394	4.98243	4.69417	6.09593	5.10442	0.841796	3.59418	4.30385	3.86283	4.24782	5.53385
ARRB2	5.23821	5.94866	6.0347	5.36999	5.85339	4.94942	5.17508	4.6094	5.00137	5.42975	5.56542	5.91825	5.1448	5.67628	4.98789	5.10119	4.5077	5.36113	4.25705	5.10493	4.14629	5.70373	4.17302	5.24179	3.91558	4.3424	3.56512	4.70872	4.92457	4.98715	5.33728	4.74316
ARRDC1	3.73993	3.95665	5.10864	4.64547	4.34701	5.38735	3.66843	5.77739	4.24758	4.19466	4.14663	4.02261	3.43825	3.37418	4.59806	5.97925	2.65595	3.94112	5.53322	5.03572	5.69908	4.36453	5.7138	5.01271	5.43386	5.02446	4.52523	4.06517	4.11976	5.2334	5.14145	5.84454
ARRDC2	3.95403	4.51557	3.35098	2.71434	3.18416	4.39487	4.19055	3.3809	4.38659	5.96814	3.84397	2.5548	2.72227	3.29011	3.63127	3.74612	1.63764	5.2201	5.93417	1.84435	6.10806	5.4167	4.42251	6.1202	6.22305	5.55991	1.94766	5.40106	5.97974	3.74366	3.96689	4.16734
ARRDC3	3.22157	5.51098	4.47721	4.33946	3.97373	5.6055	4.35048	3.89842	3.50718	4.49348	3.70144	4.67343	4.79454	5.3256	5.9142	5.16333	3.43189	4.49175	6.50987	4.9156	6.68338	5.68612	5.98825	3.61287	6.86307	6.4272	2.61246	5.1834	4.39432	4.48928	5.74201	4.81636
ARRDC4	3.38056	4.29547	3.6891	3.29589	3.20645	1.79478	1.14154	3.53529	2.42984	2.28372	2.23776	3.29111	1.67242	3.10838	2.36369	2.2909	1.90428	2.51616	3.32483	3.27039	2.79687	1.74247	2.00478	1.34209	2.69216	2.64615	2.24558	0.0522773	0	3.30159	2.39144	2.1589
ARSA	3.72636	3.81962	5.18013	4.97232	4.46975	5.41447	3.3044	3.34499	5.07744	3.47398	4.4734	4.54962	4.08661	3.21074	2.86353	3.62787	3.00359	3.43952	4.63964	3.24513	4.78414	4.16762	4.90418	3.5889	4.64828	4.4453	3.66016	3.71403	4.26272	3.32785	3.818	5.90946
ARSB	2.38394	3.08897	2.51405	1.53293	2.24293	2.88428	2.79132	1.9288	3.00797	2.75673	2.12836	2.97562	2.73711	4.16205	2.173	2.50273	1.55053	2.64219	2.57088	2.81652	3.78803	2.90694	2.98898	2.43138	3.83755	3.4282	2.49785	2.00133	2.30031	2.04696	2.42436	2.48666
ARSD	0.269482	2.00501	2.53888	4.23161	1.93588	0.397421	0.643156	3.39807	3.03268	3.50239	2.06012	0.960112	1.92862	2.72343	1.58986	2.96099	0.77717	3.68651	3.1956	2.60037	4.3545	4.29112	3.78903	3.80487	5.19224	3.99748	1.31718	2.5786	3.41052	3.72352	1.1542	3.20805
ARSE	0	0.152637	0	0.0636645	0.0094125	0.0121631	0	1.91494	0	0.355922	0.0246568	0.0118274	0.0420458	0.332412	0.0295074	0	0	0.124932	0	0	0.000304585	0.30006	0.000182877	0.0360077	0.350725	0.065501	0	0	0	0.0831782	0.0319673	0.354369
ARSF	0.00435931	2.17568	0.954259	0.573689	0.145227	0.189091	0.651784	0.169868	3.37941	1.21485	0.535603	0.511459	0.120386	2.95241	0.129107	0.0834794	1.62177	0.293556	0.238215	0.144441	0.26194	2.0962	0.206246	0.141826	0.53835	0.910046	0.0269851	0.193128	0.244477	0.429268	0.190147	0.166989
ARSG	2.68014	1.29532	1.02256	3.52318	1.67765	0.799973	1.87709	1.15166	0.904526	2.25639	1.41777	0.566845	0.732829	2.48242	0.2683	1.30841	0.770226	2.62656	1.63212	0.263439	2.29579	2.59779	0.720258	1.19272	2.28454	2.52007	0.982024	1.15242	1.16911	2.67807	0.725265	0.562219
ARSH	0	0.0262057	0.13602	0	0.0382682	0.0257613	0.258156	0.262738	0	0.039103	0.1262	0.014654	0.119359	0.0128183	0.258797	0	0	0	0	0.185102	0	1.41481	0	0.0588939	0.719027	0.191804	0.366826	0	0	2.30332	0.34076	0.0137192
ARSI	0	2.37081	0.0699309	0.0275888	0.0241165	0.408894	2.29558	0.0772278	2.25477	0.213899	0.00773173	0.116568	0.0524768	3.22204	0	0.0290896	0.426774	0.501394	0.219252	0.44975	0.437483	1.15825	0.00895034	0.0452003	0.903365	0.186645	0.0151061	0.563596	0.20026	0	0.0269774	0
ARSJ	0.949105	3.66703	1.13112	1.06931	0.238993	2.62563	1.73883	1.46264	1.45718	0.240403	0.666833	2.70052	3.69901	0.0986273	0.997526	0.122606	0.335805	1.20504	0.504482	0.902478	0.154	0.0316302	0.501699	0.202089	0.327507	0.706865	1.84713	0.876661	0.299085	0.715313	3.40539	3.40181
ARSK	2.16582	2.45675	2.61325	2.13312	3.07241	2.6901	2.73837	1.83922	2.31818	2.68633	2.05536	2.90636	2.31157	3.43285	2.93676	2.51337	1.79131	1.94823	2.75294	2.60916	3.38116	2.31148	2.46154	1.93685	3.10447	3.05778	1.66976	2.5002	1.9771	2.14753	3.06206	2.16652
ART1	0	0.072356	0.0202331	0	0	0.0367693	0	0.306121	0.0375978	0.0196223	0.0236423	0	0	0.0526222	1.48227	1.23006	0	0	2.21134	0	3.77594	0	0.0203294	0.496407	2.04207	3.18423	0	0.118788	0.093634	0.018578	2.71869	1.31063
ART5	0.110242	0.621406	2.32752	0.0711858	0	0.376597	0.68396	0.8498	2.39772	0.301306	3.65719	2.69594	0.136686	0.315411	0.149243	1.66574	0.693345	0.258091	2.81889	0.689741	1.51741	1.7131	0	1.0761	1.67477	1.34703	0.0239247	1.85181	2.42553	1.71488	0.483064	1.62002
ARTN	2.02968	1.83055	4.78301	3.15805	1.7543	5.27677	2.13007	1.96192	5.03683	3.35522	3.51709	5.35503	5.3496	0.912011	1.53963	2.98068	1.20577	2.46048	2.32855	3.27764	2.36068	4.23536	1.49623	4.17477	1.59056	1.77433	3.58115	2.72782	2.91577	4.84107	2.8501	4.25863
ARV1	5.12466	4.7654	4.67485	4.72614	4.05352	4.75678	4.63228	3.23332	5.17947	4.16074	4.36856	4.9602	4.75746	5.59424	4.44429	4.72338	4.10697	3.90431	5.87698	4.60469	5.84096	4.83545	4.82254	4.91215	5.96726	5.94978	4.2434	5.12886	4.83715	3.68529	4.71291	3.58785
ARVCF	4.0997	4.83148	4.95702	3.93353	4.30614	4.53316	2.47845	3.6988	4.83955	4.31467	4.21262	3.72706	3.77605	3.8424	4.64044	5.04089	3.88874	4.52885	4.47959	5.19235	4.02863	5.01583	4.25939	5.66028	3.98192	4.1441	3.41596	3.93829	4.10979	4.63335	4.36587	3.62599
ARX	1.62179	0.269092	0.382568	3.42887	4.67336	0.814918	0.89239	0.180748	0.0266527	0.0866371	0.683174	0.417318	0.099238	0.0369092	0.162548	0.22318	0.0491077	0.0625831	0.121612	2.22239	0.0329164	0.0533783	0.290389	0.000469	0.355103	0.182213	1.01247	0	0	3.49926	0.226188	0.118406
AS3MT	0.161628	2.87262	3.19352	3.25512	2.54681	3.91755	3.00765	3.09183	3.13719	4.95837	2.23144	2.86307	3.68258	3.24226	3.32317	4.35855	0.509043	4.24601	3.63965	4.25461	4.36819	3.76992	1.66872	1.6322	4.21806	4.052	1.46441	4.13409	3.97115	3.38889	4.05484	3.00244
ASAH1	4.70828	3.34376	6.22386	5.43451	6.60693	5.86086	5.30652	5.17698	6.1785	4.82131	6.34335	6.1362	5.13607	5.21173	3.78765	5.04854	2.99153	4.85989	4.87174	4.64305	5.72409	4.50678	5.95741	5.57094	5.38241	5.60362	5.34673	5.28469	6.42185	5.01225	4.08235	6.04611
ASAH2	1.00556	0.945952	0.700886	0.838595	1.08002	0.580957	1.35875	1.05483	1.66439	0.887651	0.0503075	0.254696	1.51096	1.21927	0.786912	1.37381	0.64849	1.01611	1.01402	1.15481	1.35267	1.03328	1.03453	0.670878	1.28557	0.883132	0.273578	0.884001	0.853028	0.94494	1.0621	1.06601
ASAH2B	3.20443	2.74005	2.37579	2.54594	3.07025	2.39741	3.66394	2.95341	4.11284	2.61766	0.656611	1.21547	3.43847	3.46211	2.93156	3.61398	1.95699	3.33897	3.68266	3.00033	3.63394	2.69101	3.23333	2.47073	3.75819	3.03636	1.87948	3.11267	2.61788	3.03079	3.36675	3.13828
ASAP1	3.81736	4.16667	4.10223	4.69506	4.07562	4.29062	4.90748	3.2598	5.06459	4.53602	2.79521	3.47356	3.74872	6.07655	3.46917	3.34886	3.37593	5.64347	3.63223	3.79587	4.29741	4.54232	3.41289	3.8294	4.55382	3.85337	1.5843	3.7535	4.68841	4.78081	5.27766	3.6226
ASAP2	0.367943	3.60366	3.6959	3.52212	4.04533	2.76037	4.11703	4.02498	4.58683	3.65932	3.53465	2.77896	3.84021	4.77307	1.72053	3.7166	3.09212	4.34979	2.20899	4.39415	3.50933	3.99077	3.2885	4.62917	4.06834	2.42685	3.00807	2.72743	4.2638	5.41326	2.72755	2.67468
ASAP3	0.125885	3.41502	3.69387	0.502752	2.66449	3.82427	2.27658	3.571	3.253	3.74989	1.10564	4.54374	1.38862	1.44692	2.29678	2.89086	0.936715	4.10489	3.12236	2.1112	4.12721	5.67605	4.42696	4.63626	4.64994	3.54787	0.283275	3.74972	3.92849	3.61666	1.74384	2.88636
ASB1	3.00989	4.56645	4.81376	3.53509	4.47937	4.52661	4.28573	3.96086	4.29382	4.24528	3.9577	4.61091	4.8767	4.56543	4.26688	4.45924	2.80623	3.93319	3.55138	4.09992	4.20889	3.5439	4.11701	3.08626	4.42905	4.59625	3.32804	3.36373	3.91985	2.8816	4.70163	3.63808
ASB13	4.27198	2.33721	3.31296	0.348193	1.39403	0.983453	3.51032	2.80255	2.64487	2.73591	2.83322	1.89095	1.38789	3.14362	2.09073	3.72425	1.40417	3.65551	2.43965	1.37751	2.50124	2.91756	1.98487	3.79199	2.85508	2.31498	1.22594	3.06663	3.60502	3.3123	2.04734	2.50655
ASB16	2.26519	2.03316	2.69368	3.10684	2.31779	2.48788	1.41604	1.95414	2.30107	1.97311	2.04561	2.338	2.0296	2.21835	1.44517	2.3168	1.18429	1.87221	2.31343	2.92767	2.62981	2.3508	2.5985	1.61472	2.62483	2.12232	2.18053	1.52544	1.98882	1.52155	2.52914	2.09451
ASB2	0.0148539	1.35866	1.38067	0.173875	0.0599395	0.935491	0.167443	0.955099	1.1339	0.353658	1.11469	0.978825	0.182265	1.34547	0.890709	0.43572	0.633013	0.145937	0.325714	0.0701025	0.461117	1.80828	0.0458994	0.25387	0.514886	0.252459	0.22482	0.37974	0.289575	0.0267112	0.492848	0.0496897
ASB3	3.0596	3.77198	4.11774	3.14303	3.88191	4.18234	4.11424	3.29392	4.31799	3.36586	3.6106	3.76186	3.88759	4.17452	3.54045	4.12753	3.03027	4.01688	2.90166	3.86334	3.6545	3.75749	3.72401	4.25404	3.77102	3.55669	2.72829	3.24803	3.64719	3.59918	4.09476	3.26246
ASB4	1.98352	0.424336	1.56488	0.659271	1.20614	0.612264	3.67349	1.55829	0.492277	1.22081	1.28723	0.474027	5.86962	5.14651	0.413618	3.11748	0.26717	0.988503	1.00163	0.710238	1.16301	0.743894	1.31972	0.932723	1.04199	0.760425	4.1289	2.12729	2.21431	0.60485	1.06233	0.864542
ASB5	0	0.052227	0.0232252	0.0577032	0.227163	0.254762	0.013434	0	0.117796	0.553326	0.339094	0.0385028	0.595082	0.0872121	0.0127684	0	0.10403	0	0.190789	0.0930488	0.5015	0.0405697	0	0	0.0522394	1.3481	0.853548	0	0	0	1.03959	1.99143
ASB6	3.16838	4.50293	5.00226	3.86848	4.88234	4.18128	4.92844	4.41936	4.3553	4.4291	4.09215	4.86467	4.47667	4.31974	4.14371	4.49946	2.72955	3.67828	4.14765	4.53211	4.15412	4.40532	3.85001	3.95564	4.06046	3.83889	3.19597	3.05043	3.19972	4.04602	4.61812	4.58485
ASB7	2.85027	2.92953	3.09001	2.58518	2.98208	2.58963	2.83363	3.29445	2.61188	2.87909	2.14109	2.89365	2.83807	3.49845	2.62054	3.84471	2.31969	3.2049	3.54106	3.28241	3.46318	3.17774	2.34357	2.76433	3.37046	3.3415	1.87858	2.77931	2.76609	3.55403	2.7739	2.52951
ASB8	3.28326	4.43216	4.79104	4.7093	5.20953	5.13032	4.53993	4.02894	5.16911	4.8925	4.27187	4.28083	4.8324	5.26221	5.07249	4.71022	4.08044	4.39195	4.70531	4.83605	4.59171	4.5167	4.64482	4.81792	4.92102	4.53243	3.46887	4.31225	4.60852	4.5349	5.57437	4.85703
ASB9	0.222149	0.770039	0.675961	4.1215	1.48055	1.2548	0.0475179	0.734444	2.56949	0.836775	0.452949	0.0879797	0.809474	0.371355	0.0757077	0	0	3.35081	0.658798	1.29814	0.383145	1.00049	0.505375	1.19898	0.698225	0.844346	0.394121	1.17797	1.76237	0.949638	0.418874	0.308551
ASCC1	4.04787	3.84744	3.91005	3.9555	3.79417	4.35764	3.47607	3.73174	3.51992	3.18551	3.5384	3.59265	4.10803	3.5582	3.5504	4.68182	2.13204	4.38896	4.00366	4.23745	4.12197	3.74935	3.38007	3.60928	4.05457	3.86091	2.93462	3.94647	4.05993	4.85337	4.06902	3.88775
ASCC2	4.79035	5.21856	4.94496	4.36799	4.63938	4.84679	4.87662	4.05981	5.20139	4.84336	4.32492	4.71956	4.96124	5.05999	3.84277	4.01341	3.53554	4.44528	3.73652	4.43216	3.89622	4.36782	3.95309	5.0014	3.70506	4.05605	4.1474	4.11044	4.30689	4.31681	4.33691	3.99211
ASCC3	4.42261	3.5797	4.30217	3.24966	4.06071	5.44592	4.77333	3.87338	4.3846	4.6721	3.12202	4.52793	4.39475	4.0814	4.2172	3.84308	2.64053	4.21755	4.481	3.4368	4.14057	3.84136	4.25829	4.67187	3.80071	4.26648	2.72119	4.13161	4.33044	3.99852	5.03787	3.65154
ASCL1	9.37858	4.47917	9.25995	8.53066	8.10005	9.61941	2.38558	4.62149	1.13139	8.1602	9.38493	8.36968	8.72275	0.612206	9.04958	9.74825	0.544323	4.19849	9.0629	9.53233	7.81414	4.13113	9.05344	7.24091	8.06616	7.97211	8.60045	7.31739	7.80652	0.583237	10.0731	9.83325
ASCL2	0	0.0411811	3.51272	0.243282	3.45653	1.1595	0.0196853	3.59864	0.272927	2.62262	0.870882	0.541787	0.0560231	1.04211	3.2008	3.76337	0	2.78346	2.256	0.136149	3.75628	2.19916	3.37698	0	3.94703	3.50306	0.152747	0.0464519	0	5.6139	2.34716	0.330377
ASCL5	1.08881	0.711944	0.922507	0.439952	0.62894	2.29684	1.00798	1.18015	0.364585	0.559494	0.462014	0.716133	1.54329	0.449627	0.837338	1.36089	0.338522	0.384656	0.929382	0.445708	1.22005	1.19453	2.01862	0.0775196	1.15907	1.07506	0.798715	1.8689	1.71619	0.0487639	0.848377	2.29859
ASF1A	4.92293	4.73756	5.25535	3.89707	4.53775	5.18586	4.64084	4.57802	5.19859	5.42943	4.73641	5.85133	5.70935	5.02507	5.78678	5.34901	3.20564	5.61204	5.46187	5.54418	5.11661	5.1453	6.37624	6.20697	5.02819	5.27574	4.40518	6.15527	5.57547	4.56907	5.5137	4.52308
ASF1B	5.94261	6.61828	6.24103	6.14928	6.50529	7.08238	4.76461	6.29745	7.16773	8.57655	5.61873	5.87482	6.89186	5.47294	8.17763	7.89168	4.66223	7.7055	7.99656	6.11618	7.69735	6.6583	7.31014	7.49482	7.54938	7.70632	6.35813	7.91015	7.7552	5.99896	7.82755	5.62785
ASGR1	0.380242	3.95625	1.87878	0.620432	1.21877	1.81458	2.08864	1.8934	2.62537	1.65612	1.19466	1.21243	1.18923	3.11715	3.28891	2.38804	1.52553	2.78042	0.401261	3.42501	0.471232	1.56686	0.375064	2.07207	0.807317	0.562853	0.518131	1.1153	0.98581	2.10104	2.12534	2.51839
ASGR2	0.0370442	0.0659665	0.141605	0.0211553	0	0.975037	0	0.508047	0.0407935	0.016243	0.763606	0	0.0785673	0.44193	1.12629	0.421976	0	0.109327	0	0.207692	0	0.0496759	0	0.41047	0	0	0.0247434	0	0.0464556	0.105095	2.59892	1.04223
ASH1L	3.52553	3.66684	4.70243	4.08116	4.14893	4.49493	4.37848	3.59337	4.15271	4.08596	3.84749	4.27555	3.93918	4.10216	3.97943	3.76756	2.906	3.50394	5.63931	3.65858	5.30495	4.45156	4.21698	4.2042	5.21626	4.77921	3.12867	4.62799	4.61505	4.2269	5.65053	4.35706
ASH2L	3.98802	5.71739	5.97724	5.33417	5.30044	5.31805	4.39813	5.01959	5.85597	5.57327	5.75918	5.34768	4.13772	5.36998	5.76307	5.83548	4.40583	5.72859	4.36983	4.85366	4.27213	4.70355	5.47838	5.41195	4.12976	4.34635	4.20405	4.65151	5.36688	6.40928	6.20007	3.30034
ASIC1	2.79706	4.0559	3.52609	0.656199	2.80988	0.599772	3.69866	1.62377	1.53931	4.89975	2.07017	4.26154	2.75837	6.90307	1.21452	1.92988	2.516	4.8554	1.82567	2.34034	1.03652	4.76533	1.01938	0.363748	0.714513	0.455529	0.747373	1.08171	0.686295	2.15539	0.562452	0.211114
ASIC2	0	0.388215	0.0102078	0	0	0.610136	0.0284299	1.01143	1.71592	0	0.128093	0.0263203	0	2.70019	0.518062	2.80103	0.0909323	0.355632	0	0	0.0168863	0.0387599	0.708648	0	0.0577596	0.0426067	0	0	0	3.46558	1.46602	0.0907765
ASIC3	1.30757	2.69424	2.61049	1.56602	2.63568	2.87715	1.36197	2.79249	3.53219	2.7291	0.834188	2.18014	1.64522	4.02634	0.800716	3.82914	2.35497	2.67601	3.75004	2.22401	3.25609	4.33066	1.88798	1.83706	3.69164	3.03877	1.79898	1.70098	1.94442	2.15618	1.30491	1.91401
ASIC4	0.286221	4.23141	0.280204	0.286259	0.0280311	0.0705343	0.286614	0.170588	2.76526	0.0682782	0.049408	0.159691	0.0623885	3.08957	0.00825883	0.0641016	1.64083	0.324532	0.040084	0	0.0218978	0.120496	0.0860126	0	0.0384931	0.0154428	0	0.118454	0.352119	0.171937	0.0845866	0.240732
ASIP	0.880355	0.729923	1.15619	0.54718	0.670324	0.521988	0.673405	0.652256	0.390619	0.505724	0.562953	1.09656	0.184268	1.55833	0.21018	1.25937	0.45866	1.90014	0.369678	0.370136	0.269782	0.474146	0.554824	0.521531	0.450284	0.114273	0.190883	0.571322	0.97533	0.792712	0.575793	1.09221
ASL	4.74973	2.74632	3.03774	4.87759	3.77902	4.42112	2.54941	5.07137	3.58215	2.9275	2.31161	2.24387	2.91196	3.43444	3.73967	3.05092	1.46511	3.32095	3.3755	3.4462	4.56751	2.9309	6.27304	3.96171	4.41928	4.17314	3.49318	3.29348	3.71704	3.15864	4.22826	3.79043
ASNA1	5.87566	6.06233	6.44954	6.1745	6.52777	5.56118	5.24299	5.54658	6.46447	7.08314	5.78349	6.30051	6.13148	5.60199	6.16127	6.93396	4.76463	6.6038	6.08537	6.0432	6.12366	5.99694	5.77517	6.88386	6.07013	6.32776	5.62932	6.25931	6.16444	5.82852	6.14587	4.94973
ASNS	6.87101	5.82559	4.99662	6.13598	6.92108	6.37285	5.6841	5.72362	6.63271	4.70723	5.45655	5.55381	6.42212	5.2523	6.25492	6.30836	5.19829	6.42675	5.9128	6.80799	4.9996	5.05183	6.21011	5.44766	4.8645	4.87851	4.6232	5.57671	6.14496	5.82976	6.08844	5.58853
ASNSD1	4.94647	5.11227	5.16361	5.24211	5.18515	5.40859	5.30919	4.97791	5.59542	4.60476	4.90347	4.8419	5.35777	6.44813	5.28466	5.55842	4.28193	4.74871	4.40975	5.11193	5.07816	4.10813	5.13195	5.04594	4.89923	4.78818	3.66094	4.68756	5.17205	5.51878	5.61245	4.66748
ASPA	0.485413	0.749301	1.07261	0.992428	0.677122	0.976568	0.856811	0.656481	1.11752	0.818512	0.778107	1.12885	0.875351	0.980455	0.610798	0.7114	0.418377	0.735814	1.06009	0.677529	1.94164	1.12069	1.41877	0.699273	1.52864	0.992572	0.402301	0.99489	0.952641	1.13464	1.01007	1.00714
ASPDH	0.358971	3.16093	2.51855	1.80561	0.751289	0.654603	0.751984	1.59487	2.0769	4.0152	1.17392	5.01441	2.07202	2.94732	0.163504	2.47222	3.70979	1.33031	0.670123	2.83719	0.355449	1.08542	0.0634177	0.461498	0.493408	0.867764	0.300152	1.2536	0.994137	0.729208	0.301509	0.618221
ASPH	5.32751	5.60309	6.40015	6.1779	6.33795	6.58523	6.13371	5.81783	5.68901	5.83581	6.80771	5.96898	7.23771	5.85937	5.65636	4.83117	3.53545	5.98848	5.61081	5.28735	5.95773	5.75177	7.15755	6.42832	6.06166	5.5065	5.00636	5.71955	6.28469	6.18715	6.62348	6.65203
ASPHD1	5.40155	4.92903	4.3743	4.79505	3.61096	4.73343	4.31191	4.17347	3.28688	3.95588	4.31325	4.35681	4.2819	3.04101	4.16303	4.42934	2.11729	4.00582	4.42819	3.70016	5.0079	3.90454	5.44835	4.77996	5.04216	5.03806	4.7773	4.46084	5.21299	3.47058	4.32873	5.32979
ASPHD2	0.728054	2.04428	2.44108	1.88173	2.3149	1.3348	2.70092	1.91749	2.19897	1.70574	2.07944	2.47281	1.62148	2.80452	1.4765	2.0419	1.64087	3.24692	1.53393	2.57797	1.56882	1.91809	1.38788	1.36214	1.1588	1.18744	1.22353	1.563	2.10508	0.557396	0.791632	2.5903
ASPM	4.72865	4.99412	4.92406	4.69495	5.80027	5.71625	3.83479	4.25594	5.60903	5.82985	4.16879	5.44708	4.84654	5.75463	4.6723	5.55232	3.78983	5.00793	6.64752	4.93374	6.83023	5.31751	5.43584	5.45931	7.09648	6.47884	3.92235	5.841	5.83976	4.4903	6.16012	5.85039
ASPRV1	1.40167	1.43861	1.6529	0.681094	0.671393	1.28974	1.57542	1.62232	0.826479	0.982293	1.64605	1.33309	1.48459	1.28811	0.778422	2.15464	0.579705	1.73061	0.547905	0.837143	1.17587	1.16206	2.17163	0.696393	1.21419	0.790912	0.670504	0.492981	0.693737	0.819306	0.94525	0.964408
ASPSCR1	5.08665	5.2381	5.9877	4.62057	5.15994	4.71549	4.05478	4.4013	5.2958	5.33573	4.71641	5.79168	5.14704	5.37772	4.48051	4.3936	4.1512	4.77267	5.22683	5.3154	4.91209	5.49133	4.56268	4.46986	4.89394	5.10179	4.53314	5.08626	5.3963	5.21439	4.86027	5.14718
ASRGL1	5.68916	5.27962	5.09803	7.63283	7.22731	6.13834	5.03478	5.8973	6.73746	6.57974	5.66604	5.83636	6.3061	6.56388	7.50283	6.94615	5.30745	6.73061	7.54633	6.68591	7.25899	6.97469	7.27354	7.30317	7.41714	7.39641	4.94554	7.25171	7.6324	5.93829	7.37705	7.93951
ASS1	2.26063	7.0751	1.77223	4.35984	3.46869	5.6917	6.11497	6.15154	5.87823	3.47648	2.34986	3.49722	3.87713	2.11978	5.94847	4.64266	2.64532	5.79463	7.14406	4.71588	7.09239	5.98596	6.99856	5.27474	7.44913	5.9367	0.572732	5.83466	4.13104	4.69639	4.51385	3.93385
ASTE1	2.32579	2.7245	3.62051	3.11454	3.36698	3.86846	2.75663	2.8404	3.80795	3.12649	2.6364	3.28162	2.96698	3.13875	2.61544	3.77515	1.671	3.08153	3.09424	2.94104	2.86217	2.84351	3.28545	3.5924	2.79149	2.74786	2.78551	3.25069	3.48252	3.48684	3.01817	2.6526
ASTL	0.237672	0.148203	0.711248	0.214728	1.44642	1.50923	0.0714395	0.640712	0.422873	0.0390082	0.844134	1.82768	2.64808	0.0815491	0.145156	0.208093	0.0728164	0.688132	0	1.70879	0.177061	0.144273	0.489627	0.459635	0.0954136	0.034499	1.72545	0.34034	0.300362	1.56911	0.0968786	0.0198577
ASTN1	0.788038	1.00235	0.480964	0.409592	1.44181	0.16297	1.74432	0.0547641	0.956131	0.421462	0.00436701	1.02017	0.0995626	2.70086	0.0216148	0.0551142	1.07971	2.14782	0.343377	0	2.04403	2.00418	0.286928	2.5687	1.77319	2.08151	0.192264	2.62986	2.92148	0.00326168	0.205559	3.56187
ASTN2	1.80277	4.33914	4.7007	4.52248	4.2057	5.3612	2.7832	2.14132	5.19922	4.64435	4.2099	3.7394	4.51202	2.79853	3.65496	2.31936	2.55523	3.85721	4.9796	3.47893	5.63319	4.97401	5.07645	4.55242	5.59633	5.33854	4.23788	3.9072	4.67184	3.78915	5.17925	4.56203
ASUN	3.67761	3.54747	3.39258	3.51683	3.99487	4.99041	4.19037	3.2264	4.79133	3.3204	3.14646	3.35705	3.46516	4.09279	3.24271	2.67688	2.55392	4.0177	3.44783	5.04861	3.09769	3.05832	2.79581	3.88361	3.00039	2.77007	2.39516	3.48275	3.38212	4.34385	3.5579	3.43307
ASXL1	5.27355	5.3482	5.27318	4.86846	5.60729	5.21421	5.24148	5.14568	5.59769	5.21164	5.16544	5.59036	4.92256	5.78988	4.80555	4.97856	3.92834	4.89952	4.99763	5.04001	5.14957	5.39282	4.60197	4.81492	5.07293	5.15641	3.55957	5.0559	4.96316	5.97407	5.24441	4.86966
ASXL2	2.8329	3.24835	4.26698	3.28205	3.88655	4.18501	3.65836	3.13798	4.14115	3.29617	3.43983	3.44021	3.53923	3.79471	2.99157	3.94108	2.5045	3.43022	3.0585	3.2389	3.84632	2.85218	3.97603	4.27307	3.66398	3.25546	2.68642	3.25725	3.89454	3.76564	3.89745	3.76403
ASXL3	1.02623	2.1006	5.30348	2.73794	2.98839	3.60231	1.05696	1.81396	2.80618	2.08461	4.59922	3.59963	1.94615	1.84592	0.4054	3.04861	1.7331	3.38465	0.661713	1.25985	0.69306	1.0302	5.01827	3.086	0.327833	2.00453	1.53348	2.94562	3.45415	0.587631	0.030081	1.4729
ATAD1	4.65359	4.99092	4.90195	5.42318	4.91214	5.19786	0.929746	5.01327	4.40612	4.72753	4.28032	4.72837	5.3449	5.06112	5.59966	6.09017	3.36235	5.36842	5.65171	5.1114	5.97553	4.84221	4.96746	4.55774	5.5778	5.54909	3.94536	4.37261	4.63575	5.52063	5.80683	5.48754
ATAD2	3.74916	5.64155	6.90787	5.95448	6.16983	6.48535	5.50219	5.48888	6.02821	6.33687	6.52781	6.87533	6.46683	5.72681	6.59748	6.43762	4.47835	6.34045	6.0303	5.40919	5.75169	6.15316	5.99833	6.28294	5.64953	5.81261	4.59296	5.30294	6.27387	6.4344	6.76096	6.07867
ATAD2B	2.08532	2.70318	3.1438	2.004	2.98859	3.4095	2.91296	1.98654	3.04117	2.50946	2.36881	2.56256	2.65567	3.07145	2.05673	2.7904	2.25816	2.30437	2.308	2.83423	2.88622	2.45661	2.70565	3.07619	3.11767	2.50802	1.82149	2.41859	2.71405	3.40245	2.77933	2.40838
ATAD3A	4.57715	5.24589	5.66462	4.81236	5.73578	5.00245	4.80569	6.2999	5.44101	5.24736	5.24111	5.7322	4.92116	4.41478	5.18619	6.41575	3.31633	5.10426	4.96704	5.13268	4.85308	5.66856	4.24178	5.0695	4.72232	4.69166	4.23555	5.22824	5.26628	5.96537	5.16296	5.42415
ATAD3B	3.86499	5.64201	4.93145	3.67578	4.43467	4.62118	4.96333	5.68245	4.77047	4.34008	4.68221	5.41634	3.94826	3.36526	3.51163	5.37895	2.67349	3.55938	4.45312	4.31998	4.50768	5.51375	3.82412	3.93267	4.63571	4.27055	2.64302	4.03056	4.17684	5.42027	4.12483	4.99235
ATAD3C	2.37109	2.9947	2.00759	1.60672	1.26474	2.36661	0.868383	2.95615	1.34384	2.52964	2.30603	0.764405	1.68572	1.04331	2.06929	3.76409	0.727288	1.27052	2.43446	0.712595	1.45556	2.5512	1.81849	1.86058	2.10124	1.51269	1.57416	1.62144	1.53461	2.07266	2.21054	1.572
ATAD5	3.24214	3.32941	4.29247	3.31125	4.28674	3.81549	3.17066	3.25915	3.82392	3.94526	3.00357	4.13196	3.8548	4.80421	3.33938	3.85156	2.82032	3.42564	4.6807	3.84988	4.61099	4.17875	3.64744	2.69939	4.72031	4.31655	1.85041	3.94251	4.3796	3.66594	5.11313	3.59472
ATAT1	3.30678	4.63037	4.71917	4.38807	4.58274	4.65145	4.58963	4.70488	4.61671	4.54532	4.48504	5.35771	4.77775	5.68414	3.41061	5.00143	3.48303	4.46021	4.77137	4.76653	4.6168	5.31347	4.46097	3.69087	4.59522	4.67997	2.48129	4.49273	4.41615	4.58296	4.50507	4.89939
ATCAY	0.216202	4.19769	4.58488	0.617062	4.80845	1.57052	2.98952	2.47891	1.90249	5.17783	3.22491	4.78866	4.72411	5.13866	1.30611	5.06315	1.66198	4.19228	0.579745	4.51666	0.787838	3.00448	0.839873	1.03897	2.54313	0.813007	0.243193	2.50813	4.10649	0.347829	0.493411	1.54261
ATE1	3.82726	3.60485	4.14419	3.58795	3.22902	4.71267	2.85944	3.70814	3.00156	4.06031	3.14313	3.53169	3.71591	3.61527	3.63781	4.18061	2.08043	3.96337	4.27802	3.46491	4.38967	3.22392	2.65103	3.62748	4.10775	3.80692	2.49383	3.15532	3.33	3.04541	4.26586	4.28329
ATF1	4.04901	4.12844	3.9059	4.23911	4.80762	4.88493	4.82685	4.72329	4.25034	4.30273	3.3586	3.78187	4.45028	4.49798	5.07659	4.78631	2.85573	4.30813	4.79283	4.33709	4.63044	3.6538	4.44845	4.99329	4.36737	4.1083	3.79254	4.68257	4.34621	4.86412	5.30525	4.92197
ATF2	4.50569	4.91948	5.35238	4.78381	4.67745	5.35814	4.35635	4.62123	5.49513	4.64032	4.50656	5.09074	5.01382	5.80065	4.9637	5.53724	2.76298	5.40855	4.64401	4.51167	5.32827	4.58343	5.33954	5.61196	5.09697	4.99922	3.76423	4.94649	5.6501	4.70831	5.45174	4.91241
ATF3	3.4651	4.04454	3.16866	4.97009	3.37447	4.91528	1.67874	3.00136	2.89866	3.13238	3.32067	3.6201	4.86871	3.16944	5.07424	4.01316	3.10772	3.64767	4.5023	3.7271	3.06544	2.64513	4.70309	2.79594	3.18981	3.02947	4.16567	4.05632	3.97567	3.64036	4.53898	5.28553
ATF4	8.54207	8.32229	8.32956	8.0985	8.61846	8.15227	7.77462	7.83335	8.61732	7.52029	8.05216	8.53598	8.67163	9.09145	7.57948	8.46217	7.00043	8.39883	7.1102	8.1998	7.07651	7.32188	7.51052	7.90019	6.99682	7.00072	6.4723	7.42139	7.60118	8.12188	7.91909	7.81729
ATF5	7.43656	8.9113	7.45004	9.20379	4.2984	6.13747	6.4794	5.81927	8.62162	6.3204	7.18443	9.76846	8.84658	5.15214	4.16992	7.2636	6.73284	6.51485	5.12255	7.89371	5.27126	5.65258	8.76128	4.94865	4.99282	5.01726	4.44122	5.74402	5.71465	6.35825	3.85288	3.67501
ATF6	4.00718	3.6348	3.92172	4.43703	3.64958	3.65584	3.62451	3.14591	3.8398	3.43243	3.47867	3.99642	3.90336	4.12499	3.59465	3.28804	3.08834	3.23242	4.71063	3.62227	4.3842	3.59653	3.56741	3.73307	4.05702	3.75177	3.154	3.97933	4.02356	3.28979	4.42884	3.97238
ATF6B	5.58561	4.97269	5.70018	5.86327	5.07564	5.89343	4.67382	5.78949	5.64548	6.10495	5.889	5.87636	6.10712	5.2056	5.69359	5.93871	4.36867	5.23774	6.41853	4.68786	6.06814	5.95703	6.13882	5.52204	5.93548	5.98761	4.8459	5.38203	5.79404	5.43583	6.86699	6.9211
ATF7	3.75834	4.35269	4.138	4.51279	4.97822	4.24304	3.84152	4.05664	4.4045	4.47898	3.54261	3.8956	4.25685	4.14741	4.70135	4.1639	2.71057	5.13017	4.55662	4.17126	4.05335	4.50781	4.1399	4.76887	4.20685	3.79109	3.36417	4.48248	4.49831	4.4996	5.07374	4.54895
ATF7IP	3.76267	4.96036	5.0331	4.11948	5.37288	5.11768	5.19073	4.40837	4.91248	5.62771	5.15981	5.00476	4.85127	5.69938	4.57638	4.5099	3.17264	5.08932	5.29955	4.10506	5.49615	4.58277	4.878	5.50961	5.49811	4.99473	3.88243	4.55983	4.86538	5.12173	5.40898	4.18811
ATF7IP2	0.101862	0.0374135	0.759652	0.0940666	0.111661	0.974437	0.495766	0.998024	0.472853	0.257022	0.309222	0.204083	0.422551	0.0861018	0.141061	0.266329	0.0721911	0.241046	1.94106	0.111502	2.06414	0.720052	0.616939	0.227371	2.17979	1.21014	0.298891	0.114046	0.554885	2.47106	0.186646	1.94143
ATG10	2.47279	3.06135	2.97694	3.47925	2.79801	3.12685	2.98196	3.12001	4.07607	2.225	2.52343	2.92469	2.764	2.76292	3.79189	3.95286	1.75802	3.55183	3.26222	3.12082	3.82044	3.20115	4.06571	3.25533	3.83923	3.5703	2.42814	2.62407	3.08067	2.86582	4.45363	3.64146
ATG101	4.28744	5.23279	5.19159	5.49362	5.2199	5.42825	5.50614	5.05627	5.72152	5.47657	4.85718	5.10754	4.81527	4.90027	5.70731	5.26297	3.75139	5.79303	5.57686	5.1464	5.84077	4.80014	6.36552	5.33121	5.74572	5.48012	4.21855	5.21871	5.34478	5.50294	5.58518	6.83089
ATG12	3.8806	3.79434	4.0839	4.76681	5.0147	4.93795	4.81074	4.40924	3.94418	3.97321	3.46828	3.98122	4.56331	5.63029	4.67957	4.91179	3.55579	4.59439	4.76691	4.31956	5.3053	4.24205	5.11547	3.81618	5.14809	5.09226	3.09497	3.72019	4.03999	4.24656	5.03362	4.39665
ATG13	6.44544	4.45617	5.67357	5.73132	5.99006	5.57652	4.79902	5.45217	5.81621	5.1488	5.26892	5.38734	5.40109	6.19545	4.94436	6.14661	3.93125	5.82756	5.53638	4.3638	5.53494	4.82865	5.6276	5.96008	5.40282	5.59522	4.58151	5.51459	5.80918	5.55081	5.5428	4.85204
ATG14	2.02753	3.18714	4.12431	2.314	3.41162	3.31211	2.57691	3.27373	3.27946	3.8013	3.1482	4.57308	4.00951	3.03625	1.4995	3.09669	1.72881	3.0902	3.31636	3.00428	3.30189	4.57474	2.95641	3.50556	3.57476	3.34978	2.10165	3.24458	3.44963	2.84335	3.19666	2.84021
ATG16L1	2.92006	3.84025	3.81089	3.09359	3.89168	3.96758	3.71947	3.98636	4.24611	3.32737	3.18567	4.06605	3.54441	4.1372	3.6178	4.07622	2.73643	3.04076	3.055	3.66778	3.69263	3.30751	3.52032	2.78424	3.63424	3.94454	2.40404	3.03065	3.4381	3.06588	3.69182	3.41374
ATG16L2	4.40538	3.36474	3.88344	4.44292	3.58926	3.38046	4.48587	3.38305	4.25423	3.26076	4.71781	3.50118	4.83394	3.0844	2.89511	2.68942	3.33024	2.74858	4.36191	3.49074	4.49438	3.84717	3.80079	3.57357	4.30811	4.56402	2.55225	3.45413	3.97691	3.11429	4.26115	4.86871
ATG2A	3.53334	3.3095	3.94728	3.34975	3.88967	3.98721	3.19462	4.37494	4.08452	3.87405	3.30064	3.83475	3.08105	3.12732	2.27335	4.11729	2.31164	3.66256	3.80772	3.60695	3.97851	3.69513	3.81503	3.93907	3.82837	3.69056	2.63538	3.87169	3.76764	3.54005	2.99977	4.34861
ATG2B	2.29525	3.43101	4.15787	2.75707	3.26627	3.14967	2.89737	2.08645	3.24546	3.67692	3.27564	4.16491	3.93669	2.53898	2.7661	2.26447	2.04215	2.77926	3.5926	2.85528	3.74153	3.82454	2.94871	3.27101	3.57548	3.56385	1.90921	3.25451	3.34683	2.56488	3.72413	2.20908
ATG3	5.33702	5.20364	5.78114	5.92918	5.39473	6.31821	5.33237	5.43789	5.64254	5.28097	4.83214	5.37119	5.82658	5.62795	5.46528	5.62241	3.85741	4.99087	5.4406	5.63217	5.20951	4.88227	5.61415	4.80181	5.37532	5.41388	5.68731	5.86572	5.68134	5.13711	5.69478	5.58383
ATG4A	3.72472	3.69579	3.90044	4.98999	3.67981	4.29432	3.03319	2.7938	4.03982	3.72778	3.62086	3.54571	3.6547	3.02741	3.96253	3.19423	2.5847	2.61438	4.87249	2.87674	4.49084	2.98154	3.34723	3.31418	4.34698	4.57238	3.60464	3.77096	3.23201	6.99661	4.43549	3.66513
ATG4B	4.91319	5.78027	5.89838	5.20734	5.59163	6.08408	5.28881	5.75908	6.02329	5.26848	5.20454	5.95561	5.69531	5.96681	5.424	5.82396	4.65715	5.21799	4.82455	5.58425	5.53774	5.55973	5.57561	4.81527	5.67667	5.62892	4.54297	5.03593	5.43801	5.07212	5.72323	5.42252
ATG4C	3.26547	3.02689	3.94627	2.92753	3.43328	3.61508	3.49626	2.79757	2.85	3.33445	2.83133	3.77894	2.72288	3.06051	3.44399	3.84652	2.66608	2.8922	2.96238	3.35149	2.92907	3.79737	2.43003	2.02171	2.37967	2.77793	2.17659	3.3159	2.98825	2.90241	3.85597	3.42219
ATG4D	5.40845	6.41798	5.83337	5.77437	6.46093	5.68103	3.86473	5.88429	5.89863	6.28853	5.27814	5.91896	6.36995	5.8819	6.40341	6.47831	4.35889	5.53335	5.71579	6.09385	5.74948	5.45628	5.82219	5.68976	5.5207	5.84356	5.41873	5.47912	5.72252	5.41214	6.15037	5.27029
ATG5	4.24081	3.87179	4.27562	4.11668	4.36681	4.77639	4.25903	4.3879	4.32346	4.26622	3.1692	4.42688	4.7904	4.3571	5.00774	4.42864	2.66383	3.60364	4.68885	4.01023	4.28837	4.1331	4.43562	4.38557	4.1921	4.50854	4.14209	4.30739	4.3887	4.53432	5.27936	4.5476
ATG7	2.7015	3.07882	2.7905	2.83845	2.30119	3.13006	2.89817	2.10078	2.42266	2.3125	2.28635	2.47317	2.10054	3.28265	3.26554	2.20973	1.77141	3.36341	3.06469	1.73047	3.11257	3.00675	1.96808	3.26194	3.22757	3.04812	2.23006	2.2559	2.47502	2.40258	3.22197	3.29587
ATG9A	3.99582	5.09179	4.64716	4.69533	4.59542	5.01743	4.32877	4.64107	5.23199	4.20743	4.73516	4.21898	4.69217	4.90091	3.95462	4.4255	3.76488	4.22884	4.43967	4.51172	4.93866	3.96975	4.7312	4.9363	5.02135	4.3825	3.98344	4.00554	4.18929	4.94699	4.76748	4.89235
ATG9B	2.29131	2.194	1.41408	2.71129	2.55701	2.51829	1.96207	1.30554	1.9868	0.202981	1.64066	1.28091	0.445626	1.87142	0.073993	0.477687	1.08214	0.289049	0.589737	0.546441	0.283687	2.05819	0.158944	0.0342236	0.250141	0.175533	1.20638	0.296256	0.234824	3.57072	0.082101	1.47147
ATHL1	0.237872	0.142077	2.40243	2.32326	0.997033	7.23742	3.71476	1.63191	2.3886	0.144362	0.893445	0.918536	2.16841	0.781353	0.597728	1.69216	0.0544036	0.467453	7.24786	2.83962	7.44176	3.51361	6.28256	0.245427	7.09594	4.58067	2.44508	0.269448	1.14582	2.48163	0.384469	7.49166
ATIC	6.3451	5.31929	5.80594	5.17097	5.43167	5.87351	6.53885	5.65659	6.07248	4.83005	5.79506	6.44025	5.55977	6.74207	5.0848	5.50731	4.88599	5.21511	4.27505	5.21417	5.00649	4.02084	5.40755	6.42651	5.175	4.7723	4.45116	5.10003	5.47375	6.4103	5.27274	5.61321
ATL1	2.71584	4.79334	4.9596	4.52395	4.5391	4.77841	3.26222	2.95088	4.78835	4.74124	4.19822	4.95267	4.60463	4.68873	4.6818	4.37493	3.11996	4.63176	4.71664	4.31441	4.66141	5.11653	4.51457	4.53401	4.54791	4.46093	3.21819	4.81805	4.79515	4.10184	4.88292	3.3562
ATL2	4.12184	4.76798	4.93274	4.15146	5.46722	5.19008	5.06702	4.49368	5.43852	4.22702	4.45991	4.48336	4.31083	5.6099	4.52192	5.07156	4.54604	4.25508	4.02718	4.12622	4.78966	4.56275	4.20314	4.91332	4.87157	4.49619	3.84608	4.12536	4.68881	6.17594	4.92727	5.3189
ATL3	2.07647	2.90665	4.00549	4.74313	4.43993	4.26142	4.28391	4.2238	3.56633	4.19783	3.64644	3.83536	3.76376	2.3248	4.36748	4.31562	1.38469	3.92683	4.80317	3.40751	5.12833	4.10312	4.74851	5.18221	5.08171	4.8905	3.3546	4.98665	4.99091	4.39614	5.05016	4.40552
ATM	3.16077	2.80039	3.66267	3.21585	3.56386	4.04397	3.60408	2.73115	4.36357	3.17813	3.5901	3.35769	3.93513	4.90884	3.03378	3.6272	2.34745	3.27812	3.82562	3.21933	3.77534	3.09853	3.55363	4.22938	3.75464	3.68422	1.76247	3.30814	3.66567	3.7733	3.67524	3.16872
ATMIN	4.86662	4.75845	4.27935	4.90333	4.15112	4.23416	3.83247	4.22375	4.3861	4.36233	3.88789	4.46441	4.38933	4.13342	4.41242	5.5006	4.27462	4.68573	4.29806	4.11477	4.33483	4.13824	4.61565	4.13353	4.01732	4.15847	3.19093	5.12707	5.35233	4.54974	4.89001	4.54751
ATN1	4.74476	5.76244	6.01888	5.94382	6.38851	6.23577	5.91958	5.92889	6.20306	6.3157	4.80161	5.82833	5.78741	5.54492	5.24871	5.50715	3.40358	6.6883	6.66204	5.41793	6.72852	6.29936	5.61228	6.56875	6.87749	6.40642	5.19617	5.9551	5.97183	6.13015	6.69958	6.10016
ATOH1	0.0251565	7.58898	1.25837	0.986179	0.107586	0.0174249	0.113732	0.267074	7.10856	0.0137942	0	2.20989	0	2.7933	0	0.201813	7.37148	0	0.0638656	0.0590461	0.0297994	0	0.104377	0	0.0312762	0.076529	0	0.083749	0	0	0	0
ATOH7	1.25953	3.16213	1.10941	0.967587	0.588696	0.606685	0.197485	1.01995	5.31387	2.62064	0.785172	1.11003	0.472772	0.753946	2.11138	2.32129	2.07212	6.28027	2.58634	0.44587	7.36256	2.14381	5.39425	7.47202	6.75935	3.76069	0.872659	8.20848	7.25008	0.179482	0.997861	1.37988
ATOH8	0	2.20066	0.361024	0.0493654	0.439091	0.863016	1.20282	0.220915	0.401505	1.73825	0.0743441	0.237586	0.0498686	2.57333	0.564075	0.0859767	2.08233	1.3264	0.932346	0.0911898	3.38256	2.33471	2.28589	1.04429	4.87491	1.38809	0.300523	0.513981	0.376596	0.0735904	0.32068	1.49308
ATOX1	5.76862	6.32745	5.88784	5.81159	6.26552	6.48191	5.86532	5.66355	5.54008	5.61984	5.47149	5.83718	5.51105	6.58128	6.39001	6.2298	4.88086	4.8251	6.21259	5.79542	6.40376	5.07046	5.76073	5.16968	6.3028	6.27686	5.05725	4.98177	5.01183	5.53913	5.83777	5.79423
ATP10A	0.00680471	0.00731076	0.255274	0	0.00415989	0.276168	0.652585	0.460076	0	0.0449718	0.177954	0.247904	0.303844	0.24355	0	1.63124	0	0.531788	3.08264	0.0684004	2.80317	0.134863	0.0904852	0	2.67361	3.2224	0.00876565	2.36202	1.70601	0.0228603	0	0.0147674
ATP10B	0.0165167	0	0.412715	0.112702	0.05508	0.918647	0.031267	0.31977	0.0942227	0.0859665	0.125965	0.11011	0.359039	0.00303299	0.0887255	0.396252	0.205043	0.0302368	0.320335	0.192986	0.717429	0.0589511	5.79174	0.0105037	0.0338073	0.501244	0.0604131	0.0212291	0.0140125	0.596358	0.264417	0.557973
ATP10D	1.61873	0.147847	1.08736	3.56395	3.32479	1.41487	2.21034	1.42784	0.0215362	1.20467	0.154042	1.42787	1.05415	0.52609	0.388863	2.85689	0.0643014	1.11686	1.0431	1.39523	3.36039	0.0208193	2.75949	2.87091	2.79222	3.14666	2.19855	2.35529	2.41376	0.16404	2.36321	2.61415
ATP11A	4.72712	4.48747	4.78945	5.99286	3.23188	3.42703	3.75283	4.55312	5.60624	3.16019	4.16581	5.20194	4.68234	5.25925	4.55682	3.96814	4.44845	3.66372	4.74949	4.22295	4.72667	3.77186	4.05455	2.78583	4.44141	4.44749	2.89743	3.30778	3.25681	4.74744	6.25148	3.33212
ATP11B	4.2886	4.06452	5.60889	5.04178	5.34719	5.59662	3.38659	4.37265	4.88083	4.08283	4.09616	5.18261	4.43126	4.58383	4.6425	4.58243	2.63803	2.11884	4.14978	5.24737	4.10578	3.81945	4.78507	4.86557	4.03358	4.15304	4.6786	4.68802	4.83504	4.47942	5.61362	5.23264
ATP11C	0.0110185	4.22209	3.92237	2.99354	4.68147	4.02613	4.36336	2.30931	0.211949	3.69855	3.49941	4.32981	3.20717	3.37407	3.26069	1.97475	2.29101	1.40605	5.36296	3.40758	5.07092	3.093	5.45676	1.13479	4.70473	4.10244	2.21755	0.0700141	0	3.79854	3.94724	3.38823
ATP13A1	5.5026	6.09401	5.28114	5.18743	5.48557	5.38895	5.6069	4.95855	5.61482	5.88014	5.13195	5.80093	5.41258	5.481	4.35154	5.37418	4.40409	5.33602	5.5958	5.31575	5.5436	5.37752	4.65916	5.1997	5.3597	5.49127	4.2536	4.92194	4.85005	5.48123	5.33973	4.21696
ATP13A2	4.97242	5.28903	5.90452	4.5623	5.85654	4.92769	4.49927	4.51927	5.55764	5.08394	4.94142	5.9215	4.37576	3.46392	4.13106	5.81924	3.78951	4.5582	5.00583	4.86476	4.63158	5.47963	4.29458	4.91021	4.33177	4.31915	3.89509	5.13198	4.95465	4.89899	4.57302	5.39258
ATP13A3	6.17491	4.88725	6.43336	6.43871	6.88013	6.64791	4.94871	6.00489	5.2982	4.84603	5.94932	6.29019	7.07791	5.51732	6.21609	6.36268	4.15795	4.74077	6.32836	5.7835	5.73042	4.71258	6.46555	5.56847	5.46313	5.74176	5.78058	5.81777	5.98745	5.30178	7.66647	6.93837
ATP1A1	7.541	8.67185	7.15491	7.37215	8.07519	7.82428	6.34726	7.07	10.1667	7.75278	6.95381	6.96434	7.67941	5.7489	6.33911	6.82249	8.28153	8.38438	7.18759	6.77707	8.57455	7.88205	7.10346	8.56431	8.5826	7.42854	7.31258	7.65508	8.05238	8.49434	7.30675	7.67267
ATP1A3	2.16811	6.60998	4.8772	4.30876	5.38679	3.72983	5.85632	2.36158	5.42002	5.91528	3.33659	5.07878	5.03134	7.90472	4.40351	2.89275	4.29469	5.81927	4.49908	3.74881	5.71882	4.83754	4.41993	5.29693	5.49266	5.72938	3.39324	4.57088	4.30981	1.81103	3.33489	4.01187
ATP1B1	5.02522	7.1309	5.89535	8.46386	6.03851	6.78332	5.7346	6.59443	8.65089	6.90201	4.20705	5.88464	6.25291	7.19121	6.76047	5.56314	6.88667	6.2312	8.05714	6.18308	9.16648	7.09944	8.27219	7.99093	8.62231	8.70082	6.16469	7.38469	7.24379	6.19467	7.90201	9.21811
ATP1B2	0.0300364	0.779642	0.633722	0.0844809	0.453818	0.21426	0.181267	0.501068	0.362243	0.765782	0.21796	0.513655	0.200841	0.612617	0.158448	0.648273	0.0908717	0.788552	0.0874452	1.03717	0.130732	0.535518	0.154251	0.162066	0.084547	0.0477503	0.0659509	0.0530013	0.252224	0.109585	0.163646	0.660646
ATP1B3	7.02184	6.439	6.15859	6.56726	6.98796	6.80027	7.39904	6.98362	6.60189	5.91489	6.15713	6.69953	6.30221	7.66551	6.88394	6.82021	5.06739	6.16468	6.61222	6.15584	6.2357	6.1949	7.32339	6.07719	6.16634	6.4496	6.45967	6.32395	6.12035	7.05469	6.5189	6.49022
ATP23	3.65873	4.31773	4.32819	4.55581	4.69037	4.33448	4.63103	3.67792	4.35707	4.62029	4.22331	4.31437	4.20128	4.21916	4.56812	4.19801	2.57639	4.07585	4.2195	3.9044	4.26778	4.24357	4.47906	4.52873	4.21892	3.77558	3.31111	3.73785	3.70141	5.08073	4.7144	3.80448
ATP2A1	1.50604	1.3661	1.90081	1.3701	0.507758	1.55225	1.62638	1.36659	2.76685	1.26104	1.35933	1.60784	0.912782	4.96234	0.991393	1.75039	2.14973	1.95232	1.0785	1.25677	1.10029	1.03254	1.62041	1.40084	1.45675	1.22791	0.791244	0.755008	1.29606	2.14353	1.18748	1.82323
ATP2A2	7.18874	6.93137	7.24978	7.23308	7.86127	7.47247	7.12153	6.93232	7.44568	6.54927	7.24624	7.36863	6.63571	7.82235	6.81644	7.18116	6.18559	7.14707	7.33047	6.70443	7.19526	6.2392	7.53722	7.21684	6.90006	6.73589	5.88323	7.07222	7.53114	7.28891	7.50589	7.93973
ATP2A3	6.05257	3.44087	6.31385	7.40083	6.68445	6.60917	2.77539	5.20077	3.15647	6.31346	6.85375	4.73857	4.26118	1.45091	7.33704	6.91583	0.100111	5.05945	4.74343	5.1536	4.22655	5.07905	7.32914	6.14137	4.13363	4.07834	4.44569	3.06181	4.63814	6.19351	8.46358	8.20633
ATP2B1	4.36347	4.55358	4.40246	4.35334	5.02039	4.01895	4.1307	3.67497	4.32219	4.82422	3.7081	4.02218	3.83451	5.4936	4.68689	3.74266	3.06167	5.9179	4.96767	4.35422	4.72989	4.15375	3.8461	5.65527	4.18602	4.07669	3.08732	4.63346	4.95209	4.47342	6.13122	4.31347
ATP2B2	0.263307	4.57518	2.68815	0.248938	0.0638808	2.16133	3.33075	0.752424	4.24645	3.55653	1.40437	2.18749	0.559946	2.10878	0.00642193	1.6137	2.65588	2.83759	0.826271	1.27676	2.11435	4.00961	0.0557947	2.46652	1.67674	2.08868	0.016391	1.20886	1.27275	0.0057762	0	0.808267
ATP2B3	0.159184	4.85067	1.9256	0.699101	0.98007	1.57666	1.86405	1.54311	4.9631	3.46781	0.331373	2.58419	0.0206937	3.73679	3.84977	2.98059	3.22525	2.32486	5.62735	0.330365	7.313	2.5299	2.30703	2.7252	7.53417	6.83348	0	3.32851	4.01217	0.00514699	3.37214	0.258038
ATP2B4	0.805701	5.18018	3.99652	5.79681	4.1905	4.47342	3.34552	3.23074	6.27733	5.02847	3.20688	2.30116	3.07146	2.52188	3.01258	3.83487	4.52058	5.43056	3.49598	2.35786	3.94231	6.04758	3.43677	5.57046	4.26133	3.44435	2.7747	4.27726	5.1525	5.33211	3.71406	3.8674
ATP2C1	5.97282	5.84633	6.38159	6.37327	6.32494	8.87982	6.10984	6.43848	6.79091	5.72663	6.21492	5.79652	6.00437	5.85125	6.52785	7.94999	4.75208	5.83773	7.04784	6.28077	6.8238	5.70287	7.12955	6.74769	6.36295	6.91725	5.52125	7.92744	8.28038	6.92125	6.9034	8.33841
ATP2C2	0	0.605129	1.47688	1.81568	1.3551	1.43492	0.300504	1.99603	0.188656	0.172855	0.985555	0.616731	2.24023	0.160099	4.47167	1.14186	0.0486949	1.43975	0.833485	0.125303	0.796966	0.44401	2.94159	1.79603	0.379829	0.747003	1.26627	1.63691	2.11072	0.646726	4.4881	1.75122
ATP4A	0.19037	2.31028	1.47229	0.389607	0.713115	4.0777	0.0554224	0.542304	0.360634	0.0880051	1.49158	2.93833	0.588678	0.296149	0.0102858	1.22024	0.131721	0.024946	1.12421	2.1545	0.283744	0.115959	0.0337508	0.165641	0.100924	0.290406	1.59771	0.359892	0.282414	0.139358	0.0526545	1.0689
ATP4B	0	1.21934	1.62381	0.0663303	0.542695	2.89516	0.103205	2.69554	0.548853	1.55529	0.706097	0.509047	1.22378	0.0930638	3.32128	4.48598	0.374557	0.893199	1.6673	1.07394	2.18218	1.41417	2.53218	0.627343	2.18189	2.58872	0.283463	1.39783	1.70555	0.563447	5.58178	1.61177
ATP5A1	8.49272	8.33423	8.45882	8.80142	8.60398	8.36914	7.66159	8.29289	8.19626	8.24301	8.45913	8.98593	8.58831	8.90534	8.40608	8.62163	7.84242	9.22818	6.9509	8.41316	8.04265	7.98973	7.91334	8.5476	7.39207	8.53731	7.5072	8.5446	8.5954	9.33255	7.90007	7.02364
ATP5B	8.98686	9.22001	8.92555	8.72188	9.41526	9.0943	8.93613	8.89103	9.07118	8.69025	8.27006	8.66126	8.32942	9.11087	9.37615	9.30276	7.53328	8.90288	8.43034	8.40123	8.59742	8.01442	8.67537	8.81524	8.49949	8.93869	7.5736	8.54422	8.638	8.99352	9.10456	8.72424
ATP5C1	7.32685	6.44015	6.76312	7.49712	6.83567	6.22069	7.11093	6.52276	7.50984	6.70648	6.29043	6.506	7.16805	6.86406	7.56226	7.28878	4.98129	6.70378	7.20406	7.1689	7.11205	6.37075	6.94296	7.49857	6.99183	7.07206	5.74211	6.86781	6.63663	7.84616	7.69563	6.46835
ATP5D	7.97847	7.00148	7.20578	6.85937	7.52826	6.72302	6.87089	6.49998	7.09534	7.47958	6.53174	7.41459	7.43516	7.35907	7.42907	6.81238	5.40107	7.04761	6.7382	6.71858	6.7883	6.15005	6.15259	7.4853	6.6892	7.26993	5.921	6.58225	6.22773	6.74518	6.91423	6.49799
ATP5E	7.63618	7.26952	6.53651	6.76745	7.93861	6.97366	6.89156	7.0591	7.03369	6.93845	7.06977	6.8343	7.09752	7.1667	6.84962	6.67825	5.48431	6.83882	6.41341	6.37275	6.42717	6.51684	5.79969	7.04288	5.85055	6.89891	6.25736	5.88654	5.8757	7.33574	6.47365	6.98405
ATP5F1	7.5304	7.15154	7.58106	6.72608	7.42362	7.37037	6.17216	6.50253	7.2881	6.60503	7.05607	7.42873	7.04071	6.68617	7.3412	7.29382	5.81246	6.91442	6.72801	6.66711	6.85352	7.22776	6.80833	7.1118	6.78744	6.9848	6.54414	7.10235	6.965	6.94356	7.7048	6.44582
ATP5G2	8.3415	9.08953	8.92455	8.77643	9.1664	9.05462	8.74721	8.33545	9.13057	9.08984	8.6317	9.0951	8.93287	9.83948	9.11472	8.80543	7.55826	8.84742	8.55342	8.8008	8.57337	8.15557	8.04791	9.24234	8.65593	8.31981	8.0679	8.07816	8.28435	9.31905	9.53757	9.19946
ATP5G3	8.09157	7.89777	7.58479	7.89401	8.21359	8.38487	7.33499	7.80237	8.21225	7.33314	7.47514	7.41722	7.59403	8.39999	8.50732	8.05359	5.83614	7.73845	7.09428	7.7995	7.94833	6.96537	7.86882	8.26878	7.77755	8.18449	7.21599	7.38678	7.81263	8.32078	8.49641	7.63787
ATP5H	7.73662	7.80491	8.16727	8.156	8.4211	8.05758	7.59594	8.24493	7.87771	7.97046	7.28403	7.89588	7.8667	8.484	7.7457	8.27984	7.25073	7.55844	7.79328	8.20136	7.82201	7.38104	7.63925	7.26253	7.62106	8.23383	7.66377	7.31596	7.47517	7.8225	7.68453	8.1061
ATP5J	7.97372	8.06313	7.74735	8.22364	8.00083	8.22183	8.42206	8.0605	8.33702	8.2637	7.10284	7.74371	7.6623	8.23725	8.44149	8.54105	6.80998	8.69954	8.27338	7.7095	8.11137	7.71322	7.71489	9.0867	8.0183	8.38586	6.32977	7.64587	7.13646	8.28798	8.12366	7.82889
ATP5J2-PTCD1	3.52453	2.05448	2.06202	2.70548	3.25712	2.77103	2.37958	2.41923	2.52781	1.39699	1.07565	1.92121	2.69142	1.81594	1.77496	2.58459	1.35258	2.27112	1.98816	2.46815	1.95276	2.34986	2.28885	2.51103	1.50367	1.78257	2.20067	2.19097	2.72148	2.74534	2.31741	3.45981
ATP5L	7.80816	6.43785	6.9141	7.90138	8.14613	7.71316	6.67127	6.76536	7.39811	7.03997	7.20219	7.05517	7.46975	6.68192	7.68898	7.70906	5.51939	8.18996	7.20384	7.05598	6.99958	6.58392	7.03527	8.83385	6.91633	7.43456	7.26305	7.64502	7.60205	7.59343	7.8348	7.63167
ATP5L2	0.7566	0.514589	1.25203	0.630309	1.02979	1.3994	0.966852	1.3715	1.31308	1.02264	1.32209	1.18222	1.21161	1.27448	0.560632	0.752385	0.625126	0.41447	1.38862	0.857814	1.23741	1.8117	0.991429	0.690942	1.12702	1.45495	0.607151	0.662571	0.756182	0.993482	0.936823	0.472819
ATP5O	8.30375	7.98061	7.49592	8.11016	8.17835	8.32903	7.91904	7.883	7.97397	7.94666	6.84265	7.63085	7.62012	8.78807	8.46573	8.15363	6.77592	8.62697	7.81718	9.19962	7.73945	7.62201	7.95573	8.53368	7.76949	8.21555	6.38435	7.8513	7.26685	8.14314	8.04534	7.27114
ATP5S	3.56016	3.28096	5.07829	3.27012	3.89967	4.27104	3.01981	3.20267	3.80476	3.66834	3.92491	5.10804	4.24453	4.0791	2.62845	3.62737	2.07582	3.44425	3.618	3.53579	3.74635	4.25489	3.59948	3.96436	3.49423	3.6046	2.75181	3.60706	3.7912	2.87721	3.59533	3.28813
ATP5SL	5.15325	5.91813	6.06839	5.58756	6.502	6.0955	5.02356	5.09758	5.86448	6.47939	5.51661	6.21374	5.8107	6.20228	7.12071	6.22531	4.04884	6.22835	5.24461	5.88608	5.18847	5.51292	4.84174	6.01688	5.16459	5.42851	5.13675	5.54472	5.78262	5.80633	6.20747	5.65797
ATP6AP1	6.58468	7.11724	7.40549	7.20407	6.81821	6.70835	5.75489	6.24201	6.792	7.22443	7.01929	7.28025	6.64037	5.91892	6.43566	6.61168	4.86152	6.40522	7.55498	5.89085	8.025	7.18101	7.94948	6.89739	7.90652	7.65325	6.16456	7.01487	7.12355	6.41402	6.98676	7.64763
ATP6AP1L	0.758266	2.08034	1.44549	3.11875	1.86802	1.48354	1.75321	2.13109	1.9107	2.10717	1.64176	1.27046	2.73287	2.17181	2.03504	2.66518	0.597447	1.87373	2.29579	2.47489	3.10824	2.01869	1.66152	0.895952	3.07818	3.21597	1.67656	1.5081	1.39253	1.69396	2.47869	2.82966
ATP6AP2	6.57936	6.84577	6.88589	7.15485	6.06642	7.10118	6.2759	5.98707	6.96821	6.50355	6.49696	6.37654	5.83658	5.75287	6.68952	6.69179	4.75037	5.89671	7.97912	5.89109	8.03693	5.98094	6.69984	7.34393	7.85568	7.5906	6.04166	7.52217	7.64577	6.74401	7.1392	7.72024
ATP6V0A1	4.63067	5.27339	5.88469	6.17168	5.78536	5.14928	4.70726	5.0455	5.79532	5.4393	5.36951	5.70231	5.22388	5.6883	5.68195	5.74624	4.6146	4.78148	5.43992	5.17554	5.44965	5.37885	5.9485	4.90234	5.40899	5.63079	4.92282	4.72658	4.88684	4.31828	6.11011	5.71745
ATP6V0A2	3.67009	3.62686	3.97018	3.87711	4.60501	3.87381	4.19067	3.87371	3.56255	3.60957	3.34663	4.27371	3.61481	4.39713	3.94627	4.26146	2.93393	3.98471	4.33966	3.98592	4.04801	3.5021	3.75391	4.51021	3.9857	3.75949	2.97754	3.78007	3.94271	3.76967	4.57417	3.62684
ATP6V0A4	0.0146784	0.0629006	0.278654	0.0179649	0.0626401	3.04615	0	0.372874	0.0160251	0.0673693	0.662214	0.035539	1.50393	0.0253926	0.524194	0.0880184	0.0306086	0.00986202	0.0873243	0.559399	0.180467	0	0.208959	0.0278476	0.0556637	0.701998	0.0473588	0.0717418	0.0186974	1.17189	3.32795	1.34133
ATP6V0B	8.59724	7.74094	8.24312	8.46659	8.62203	7.56038	7.54083	7.96025	8.77264	8.22683	7.32045	8.14396	8.05299	6.83134	8.1558	9.1597	6.94975	7.67903	7.73034	7.36243	7.65448	8.26475	7.90781	8.42666	7.22685	7.3616	8.52784	7.36236	7.52022	7.92619	8.3336	8.14107
ATP6V0C	7.41125	7.38175	7.99605	8.04635	7.12669	7.40502	6.98224	7.48203	7.56279	7.4214	7.42354	8.0446	7.66001	6.08473	7.11068	8.59107	6.30803	7.41983	7.6589	7.64225	7.83368	6.98598	8.45688	7.36597	7.80935	8.05399	7.84141	6.30024	6.8371	6.66653	7.18733	8.53695
ATP6V0D1	5.83479	5.92348	5.79451	5.6774	5.43363	6.90956	3.70884	5.96678	6.06189	6.13999	5.0997	5.33502	5.79111	4.43848	6.02112	7.22253	4.8141	6.5153	6.17267	4.73289	6.75333	5.90239	8.07214	7.04621	6.49138	6.65694	4.96804	6.68833	7.36297	5.68592	5.77437	7.42631
ATP6V0D2	0.631368	0.576231	0.661796	0.710708	0.60872	0.642365	0.488474	0.373032	0.590001	0.417271	0.669268	0.689006	0.667479	0.470722	0.341539	0.671759	0.341444	0.404921	0.384413	0.624249	0.845682	0.639509	0.530714	0.315001	0.552164	0.530473	0.496802	0.581663	0.424256	0.596505	0.623247	1.38722
ATP6V0E1	5.75088	6.21005	5.79594	6.96374	6.86034	7.17043	7.61183	6.59697	6.09695	5.66117	6.18343	5.29703	6.02735	4.96111	6.87112	6.25921	5.0374	5.52742	7.06803	6.34351	7.10121	5.36873	6.51325	5.90386	6.94238	7.00101	6.02217	5.69877	5.9911	6.34264	6.6609	6.96832
ATP6V0E2	6.14373	7.06686	5.63891	7.134	6.7236	6.03952	6.73711	5.71309	7.39974	6.57653	5.13088	5.60576	6.49797	6.28881	6.52561	6.96594	6.38455	7.25473	5.51347	6.04721	6.64013	6.28262	6.33849	7.21844	6.17917	6.65607	6.1071	5.67375	5.82074	6.25016	6.47972	5.20003
ATP6V1A	4.80114	4.51231	5.82316	5.87507	5.76897	5.97541	4.72749	5.2046	6.02213	5.06179	4.35786	4.80215	5.47321	4.67796	5.08555	5.73804	4.12265	4.28158	5.12143	5.01434	5.16275	4.50069	5.48908	4.47759	4.93948	5.35512	4.99863	4.91255	4.97935	4.9694	5.46166	4.72624
ATP6V1B1	0.560417	2.31503	1.93669	2.22596	2.01986	1.52007	1.11129	2.4715	2.08968	1.87182	1.57383	1.27722	2.92492	1.37848	1.33171	3.12421	1.55076	0.118214	1.85961	1.23219	2.56913	1.83814	2.19044	1.76584	2.32094	2.06244	2.82831	2.1012	2.50688	3.76359	3.233	3.88759
ATP6V1B2	5.77626	5.0247	7.38836	5.79529	7.3963	6.42843	5.12209	5.92143	6.24209	7.08799	7.18591	6.38594	5.58529	6.36196	5.68201	6.90169	4.74441	7.0774	5.29826	6.12025	4.97178	5.67272	6.04676	7.46811	4.68838	5.4342	6.35558	5.48805	6.3492	4.69478	5.45611	4.47332
ATP6V1C1	4.83177	4.19326	5.93373	5.75509	5.57859	4.92415	4.83605	4.68748	5.15221	4.7091	5.38916	5.52565	5.66015	4.65339	4.52935	5.18191	3.16217	4.39221	4.81854	4.14593	4.90292	4.95848	4.46296	4.86286	4.73389	4.78523	3.88195	3.91247	4.76363	5.29456	5.60174	5.68136
ATP6V1C2	3.70272	1.21603	5.40698	5.2599	3.49956	1.9858	0.795831	2.41707	5.33931	0.650539	4.36308	3.17097	1.26133	1.53538	1.34671	3.60965	3.73487	2.45046	1.98751	2.98084	1.14641	0.753032	1.44601	0.92744	1.33084	0.662923	2.21333	2.05071	2.26438	3.6197	2.42191	2.22403
ATP6V1D	4.8339	5.91894	6.65669	5.34854	5.95904	6.06293	5.4273	6.13375	6.34049	6.40405	6.31782	6.5151	6.47224	4.91614	5.46996	7.10368	3.7769	6.34951	6.52219	5.49036	6.08496	5.78761	6.3036	6.17447	6.03602	6.1129	4.57073	6.24129	6.32329	5.43449	6.40069	5.3831
ATP6V1E1	6.44439	6.30188	7.55311	6.51733	6.36484	6.23732	6.2393	5.94769	6.98848	6.34548	6.7133	6.73425	6.77506	6.75282	5.86458	6.34805	4.81076	6.38973	5.67906	6.21236	5.25435	5.57456	5.67445	5.44152	5.1657	5.52548	5.73379	5.32456	5.58008	6.97794	6.32535	5.79765
ATP6V1E2	0.850451	1.69153	2.214	2.11021	2.72475	2.2077	1.74715	1.64945	1.67623	1.03011	1.58196	1.41491	1.10993	2.0552	1.16758	1.88138	1.22068	0.863559	1.37314	1.37718	1.99756	1.16139	1.71042	1.51032	1.92575	1.24269	0.537204	1.20813	1.77967	2.45596	1.5712	1.8794
ATP6V1F	6.47022	6.81844	6.3325	7.5915	7.59601	6.63777	6.35804	6.28505	7.66323	6.61104	5.95361	5.85476	6.9392	6.07605	7.22399	7.24266	5.51573	6.29638	6.39202	6.81755	6.5517	6.42832	6.49615	6.96683	6.4344	6.40402	6.50134	6.61617	6.5506	6.68869	7.16888	6.1785
ATP6V1G1	6.09108	7.03024	7.90867	7.168	7.27093	6.50561	6.5415	7.35435	7.67104	7.0086	7.45528	6.93807	6.93003	6.69176	7.66546	7.92864	5.73292	6.35981	6.37422	7.40511	6.42732	7.16443	7.03108	6.91156	6.3952	5.83256	6.75341	5.86143	5.75406	7.97502	7.82693	8.02894
ATP6V1G2	0.920119	4.0428	3.14336	3.09573	1.64638	2.0419	4.29662	1.83584	2.40066	4.00546	2.55651	3.10307	4.08288	4.75845	1.5312	3.47643	2.73633	2.77133	2.69548	3.21712	3.52239	3.223	3.36982	2.63368	3.59479	4.17038	1.83146	2.24525	2.27826	1.2889	1.69965	1.80869
ATP6V1G2-DDX39B	0.540813	5.97691	0.373856	3.91221	0.393485	0.352631	0.331417	0.57027	0.63962	0.346729	0.368779	0.380697	0.374437	0.336857	5.18405	0.54155	0.564034	6.27472	0.602041	0.631652	0.658244	0.533015	5.31852	0.340343	0.595762	0.534283	0.420324	0.576798	0.664715	4.28474	5.64686	5.37146
ATP6V1H	4.29036	4.93013	5.86952	5.92912	5.26068	4.5488	3.73548	4.71472	5.44338	5.84396	5.43608	4.95152	6.20757	4.62841	5.49438	5.37679	3.41696	5.88481	4.34712	4.79051	4.62516	4.56097	5.35875	5.90212	4.28301	4.63478	4.28073	4.5345	5.18683	5.84683	6.40466	5.78288
ATP7A	2.53661	2.79903	3.52403	2.93373	2.49381	3.69353	2.63302	2.42375	2.60599	2.64793	2.85945	3.80291	2.32994	2.72271	2.56112	2.40405	1.67958	1.66408	3.60947	2.36725	3.809	2.2057	2.34755	2.17662	3.39135	3.6986	1.93868	3.24133	2.9336	3.04909	3.3412	2.62795
ATP7B	3.95988	1.00531	2.77673	2.40533	1.52798	0.774932	1.33378	1.50449	3.43416	1.12045	3.40137	3.23684	3.35815	2.29699	3.22241	0.962967	2.11403	3.36753	0.986816	2.01324	0.622153	1.91202	0.814195	5.13914	0.766846	0.811617	3.07866	1.56557	2.317	2.52394	6.06368	0.881094
ATP8A1	3.24895	5.35221	3.55898	5.48387	2.65518	2.97399	4.10593	1.96482	5.45613	5.51271	3.76223	2.83561	2.79439	3.26462	2.15445	1.82585	3.47673	4.44886	4.01745	1.65243	6.75651	3.81269	3.47358	4.51889	6.8793	6.58305	3.13139	3.77005	4.3742	0.45834	4.30307	4.56468
ATP8A2	0.425337	2.31894	2.65631	4.94447	2.83894	2.2553	1.2476	2.00381	2.43636	2.12173	2.32584	1.90026	3.23899	2.90713	4.67797	4.46631	1.43008	3.99256	3.04915	1.11193	4.63429	1.59686	3.90706	4.7632	4.85398	4.98298	2.54733	4.74345	5.29033	0.100501	5.71927	0.671145
ATP8B1	2.51526	0.542667	3.45371	5.35104	4.06071	3.30892	0.375467	3.25886	3.7669	1.26379	3.74074	3.24848	4.44582	0.60057	4.58488	2.16239	1.36531	2.62874	2.19791	1.65802	2.52722	1.88905	2.9119	3.88166	2.51653	2.53974	3.23044	1.29821	3.12149	5.01237	5.60786	4.62276
ATP8B2	2.50756	6.58122	4.66069	1.62606	3.66142	4.09486	5.15216	2.97926	7.80161	4.19555	3.72456	4.63833	4.33679	5.65327	3.20975	3.99798	6.93491	2.98278	3.9465	4.28283	4.82433	4.42103	3.34433	3.81621	4.50327	4.60877	2.91834	4.33016	4.78267	3.01127	5.16781	2.42515
ATP8B3	0.135751	0.472016	0.601214	0.301117	0.283203	1.27152	1.71825	0.937582	1.67243	0.696196	0.347758	0.405873	0.349764	1.58883	0.371985	0.541405	0.115201	0.525271	0.588511	0.279348	1.40515	0.561013	0.534688	0.557557	0.91549	0.819244	0.184597	0.588276	0.596105	0.758	0.465794	0.722143
ATP8B4	0.911877	1.03873	0.386578	0.823889	0.226727	0.63587	0.100338	0.268306	1.45731	0.222887	0.61529	0.622009	0.259468	1.30909	0.158527	0.41751	0.500128	0.59893	0.697649	0.0440828	0.812281	0.648848	0.538735	0.187915	0.508997	1.18978	0.0259283	0.962024	0.623836	0.462482	0.145493	0.177942
ATP9A	3.32914	4.52895	5.57895	4.88585	5.36305	3.19726	3.69459	4.73276	4.86676	4.46843	5.18912	5.18757	4.25587	4.11057	3.23746	3.88228	3.54597	4.36655	4.98097	4.86948	4.81618	5.26748	4.47885	4.89564	4.68769	4.59912	3.92888	4.52186	4.2307	5.12278	3.69829	4.05532
ATP9B	4.76898	4.23513	5.6354	5.25132	5.1877	5.2325	3.74456	4.66645	5.0987	4.71479	5.97461	5.64437	5.7102	4.90024	4.91408	4.98808	4.17906	5.42203	4.41789	5.44438	5.46267	4.52507	5.07734	4.70053	5.11862	4.95305	4.19499	4.98784	5.46585	4.7821	5.91488	4.91759
ATPAF1	5.31303	4.95688	6.07362	5.12655	5.85018	5.27623	5.31283	5.23764	5.92484	5.66217	4.09924	5.81289	5.23033	4.61887	5.13708	6.24835	4.05063	4.91869	5.61478	5.36562	5.8029	5.69871	5.96699	5.70968	5.83332	5.74006	5.24127	5.80191	5.7168	4.69651	5.50612	5.41422
ATPAF2	3.83516	4.55971	4.96718	4.03181	4.94147	3.64458	3.18348	3.11667	3.75444	3.98504	4.62872	4.3283	4.49708	3.79033	4.14615	3.67734	3.8028	3.93844	3.19552	4.09352	3.0481	4.57673	2.92683	2.61007	2.90585	2.63221	3.29379	2.84331	3.5569	3.36511	4.26146	4.47522
ATPIF1	7.88101	7.78484	8.31289	7.38071	8.31939	7.19035	7.01432	8.47939	7.87433	7.45599	7.77707	8.26896	7.72707	6.53057	7.15932	8.91299	6.66042	7.31895	7.58197	5.9674	7.5405	8.13593	7.23758	7.7849	7.46422	7.05538	6.93287	7.13837	7.30555	8.07651	7.70321	7.37325
ATR	2.79166	2.5458	3.81616	3.57656	3.80623	3.97692	3.09367	3.11545	3.46936	3.07707	2.58239	3.07608	2.7024	3.37075	2.84407	3.6322	1.81795	2.83942	3.51226	2.91531	3.32099	3.05863	3.74058	3.92161	3.32987	3.16402	2.21207	3.33348	3.58872	3.18562	3.99364	2.51293
ATRAID	5.96704	6.43754	6.72794	6.88607	6.98863	7.55581	6.92123	6.14427	6.96751	6.09193	6.63153	6.32999	6.80937	6.15073	6.53509	7.18442	5.35298	6.35601	6.12738	6.88436	6.99776	6.1737	6.99077	7.4086	7.09188	6.8795	6.87952	6.32115	6.91768	7.19072	7.07167	7.55279
ATRN	4.38891	3.60101	4.94096	4.47814	4.86604	5.57287	3.92527	4.70773	3.78556	4.13113	4.50128	4.8092	3.98252	4.18909	3.93003	4.27416	2.45194	3.32995	4.85871	3.60143	5.09482	4.41367	4.13151	4.74793	4.98519	4.90095	3.27564	4.76404	4.7246	3.13799	5.06501	4.98667
ATRNL1	0.954273	4.02906	2.24026	5.11605	1.34518	2.02265	2.50761	0.429358	4.70506	2.39667	0.18944	0.422395	0.658243	4.63368	4.22606	0.767229	3.12165	5.41299	1.35411	4.13537	0.958876	1.37021	1.87847	4.07857	1.39119	2.02504	0.000526265	2.23779	2.34196	0.229831	4.79715	2.02722
ATRX	4.10736	4.66258	5.19787	4.70362	4.79151	4.1698	3.21566	3.90568	4.01323	4.77238	3.92662	5.81945	3.93751	4.81138	3.20311	4.5734	2.60344	4.17144	5.89837	4.15701	5.81496	4.48218	4.28584	4.15338	5.75395	5.31082	2.93038	5.41894	5.48208	3.90218	4.76634	3.76502
ATXN1	0.0789608	0.16789	0.0363149	1.00492	0.662781	0.156179	1.34804	0.770956	0.945306	0.0533307	0.0213711	0	0.059771	0.587204	0.948682	0.169765	0.0615306	0.102497	0.237697	0.017496	1.18005	0.959981	0.211226	0.155464	0.978539	0.0404139	0.388919	0.352226	0.193597	1.13689	2.45803	0.717847
ATXN10	5.19921	6.07308	6.34034	5.49658	5.8842	5.79981	6.33459	5.42284	6.52845	5.60262	5.33728	6.13846	5.64058	6.64849	5.53793	6.19788	5.03746	5.81631	5.16697	5.97167	5.27567	5.42888	5.10061	5.43418	4.90367	5.25339	4.41514	5.33046	5.30695	4.92149	6.03096	5.227
ATXN1L	2.81291	3.42669	3.54202	3.43674	3.29273	3.28716	2.35767	3.30442	2.67227	3.47703	2.53779	3.22969	3.48108	3.03719	3.28117	4.0877	2.30468	3.60062	3.49008	2.98657	3.35539	3.35478	3.8646	2.89992	3.28693	3.24019	2.26823	3.45325	4.11078	3.52046	3.87693	4.8513
ATXN2	3.64776	3.67555	3.95254	3.72795	3.91866	4.51695	4.01237	3.86154	3.91395	3.93004	3.5161	4.08713	3.64798	4.64309	3.63429	4.12668	2.93338	4.16603	3.99289	3.37963	4.03368	3.44858	3.65499	4.03612	3.92592	3.7145	2.52731	3.62989	3.42484	4.01169	4.56684	4.51145
ATXN2L	6.08078	6.55641	6.5149	6.37782	5.94905	6.80026	6.34166	5.97942	5.86263	5.88308	5.94992	6.62921	6.67723	5.85579	5.4926	6.48873	5.06605	6.32384	6.58892	6.50275	6.41714	6.02678	6.92129	5.80751	6.34463	6.51775	5.71082	5.39809	5.83463	6.52367	6.27121	6.51307
ATXN3	2.45225	3.5427	4.86021	2.98167	3.7279	4.36411	3.5092	3.00441	3.89292	3.91718	4.21244	5.10801	4.88794	3.48797	3.18925	2.64839	2.39684	3.31178	3.21544	3.65392	3.47371	4.42868	3.58608	3.76393	3.32389	3.2007	2.00273	3.95195	3.95235	3.6104	3.42583	2.69015
ATXN7	2.11522	2.67263	2.79361	2.91939	2.83622	2.71117	2.98485	2.15623	2.39058	2.81678	2.44853	2.35971	2.60898	2.78487	2.12869	2.17663	1.13609	2.17271	3.63617	1.94131	3.68631	3.22454	2.6938	2.41652	3.63325	3.46219	1.88535	2.67522	2.89458	1.88596	2.21316	2.87212
ATXN7L1	0.108749	2.73068	1.35594	2.07868	3.172	4.1447	2.1857	2.50042	3.28262	1.82357	1.01632	1.29839	2.12048	1.43047	2.80961	2.34506	2.00231	3.0491	3.23957	2.1054	3.54092	2.41364	4.12888	3.52511	3.71008	3.19825	1.76994	3.33164	3.47902	3.39072	3.29012	2.72945
ATXN7L2	2.99515	4.74669	3.22208	2.62813	4.0133	3.66913	2.46611	2.84471	4.38141	3.8193	2.65426	3.84285	3.76776	4.48875	2.46615	3.91478	3.00027	4.0073	3.32647	4.00283	2.79165	4.1792	3.30531	3.34495	2.77835	2.61751	2.22174	3.92347	3.56763	3.6683	3.31974	1.73685
ATXN7L3	4.88095	5.21399	6.25018	5.55021	5.59541	5.28674	4.57725	5.53052	5.39135	5.01105	4.95253	5.67758	5.29589	5.94436	5.12695	5.46219	3.99135	4.41179	5.4924	5.9277	4.98391	4.77263	4.71876	4.16538	4.96009	4.74119	4.37844	4.75224	4.97033	4.55603	5.66918	5.64795
ATXN7L3B	5.37191	6.15622	6.2339	6.21773	7.04206	5.79192	5.52001	5.48979	6.22544	5.827	5.66516	5.70322	6.33444	6.30821	6.27627	5.8991	5.24803	5.77397	5.75406	6.21841	5.33382	5.04652	5.86435	5.75268	5.26638	5.02034	6.02865	5.25036	5.24309	6.19444	6.60723	6.38436
AUH	4.08665	3.72486	4.09787	4.09478	3.81764	3.75793	3.01927	3.26107	3.13704	3.59124	4.29231	3.65984	3.64077	3.67258	3.95292	4.22145	2.10378	3.17114	3.64749	3.23867	4.06075	3.62521	3.45238	3.27568	3.99221	3.54883	3.1964	2.91012	3.28602	3.79591	4.61483	4.88426
AUNIP	2.42044	2.54479	3.00988	1.67322	3.33461	2.43398	3.41205	2.8653	3.11636	2.69698	2.36287	3.86804	2.30419	2.49465	2.38622	3.71806	1.74301	2.45855	2.7873	2.36284	2.26069	3.58127	2.49797	2.97375	2.23903	1.86372	1.48103	2.81211	3.09568	2.85133	2.44585	2.70309
AUP1	6.42092	6.76187	6.2549	6.25687	6.87969	6.66179	6.53603	6.905	6.87686	5.86101	6.37972	5.92625	6.51117	7.23199	6.4075	7.07564	5.6945	5.98426	5.90523	6.5573	6.76273	6.09981	6.45419	6.5723	6.61401	6.58566	6.20249	5.93199	6.39526	7.21577	6.69386	6.9141
AURKA	5.71689	5.69945	5.69923	5.05252	6.0482	5.76205	4.70008	5.64907	5.72536	5.86807	5.74651	5.9653	5.15762	5.53293	5.30092	6.04344	4.19545	4.80365	5.64179	4.78808	5.60454	5.11462	5.53078	5.35648	5.34693	5.79513	3.97531	5.06456	4.97663	5.60196	6.0421	5.70955
AURKAIP1	6.75809	7.69968	7.64975	6.69399	7.26657	6.81682	7.31228	7.89699	7.47796	7.38238	6.90891	7.59268	6.6192	6.93021	7.07086	8.35614	5.02737	6.62005	7.34595	6.96818	6.98842	7.03054	7.08991	7.41265	7.15198	6.85255	6.05629	7.20323	7.03953	7.24642	6.76828	7.31474
AURKB	5.43177	6.4813	7.10444	5.34699	6.84603	5.51341	4.85001	5.66122	5.7989	6.49434	6.37772	7.0741	6.63111	6.35584	7.10722	5.70728	4.78361	5.79556	5.516	6.28642	5.03527	6.59213	4.98012	5.93521	5.1987	4.66073	4.64761	5.7281	5.86821	5.18824	7.02532	5.34706
AURKC	0.627503	1.64068	0.731708	0.772464	1.11315	1.63463	1.05302	1.32466	1.47977	1.69703	1.00832	1.06595	1.5253	1.28865	1.17967	2.46063	0	1.8987	1.80275	0.944804	1.60536	1.2686	0.966722	1.53075	2.09256	1.76837	0.948707	1.40994	1.48855	1.7364	1.32426	3.11997
AUTS2	4.51634	5.52694	5.16597	5.39182	5.32551	3.82698	6.56868	4.85581	5.72152	5.55681	4.65585	5.71729	5.68083	5.0442	4.19848	6.24561	3.78618	6.17197	4.89725	5.97705	5.12978	6.13623	3.69996	6.00908	4.87949	4.62289	3.52549	4.69715	4.80368	5.25274	5.4618	4.33456
AVEN	2.5554	2.45908	0.88342	2.93096	2.26869	2.12529	2.66735	2.61428	1.78358	1.80283	0.419966	0.758404	1.17737	3.78098	2.50296	3.03576	0.703879	2.07114	2.85713	2.60438	3.13617	1.93669	1.44631	2.33981	3.52706	2.95145	2.01246	2.88093	3.23743	3.76875	1.90859	1.79964
AVIL	2.58434	3.22247	2.84155	1.8537	1.72251	2.94437	1.08618	1.23146	2.48238	1.9587	2.64613	1.98846	7.21963	2.47923	1.39448	1.27765	1.12856	2.37805	1.30401	2.19095	1.0947	2.0468	2.23423	3.92603	1.20359	0.772151	1.5496	1.59141	2.12301	3.50792	1.75082	2.2978
AVL9	4.16782	4.33782	4.41141	4.99016	5.27971	4.78256	4.03005	4.33085	4.47946	4.17643	3.16457	3.84657	4.62255	4.04655	4.17031	4.69678	2.84577	4.36152	5.10912	4.28711	4.6549	4.4794	5.17104	4.78777	4.60202	3.92164	3.68812	4.39209	4.96808	4.17604	4.98484	4.97748
AVPI1	1.83789	3.04418	1.82179	0.960063	1.05925	2.2051	1.36159	2.77554	2.12861	2.62341	1.51146	1.6371	1.70483	1.17992	2.16383	1.76622	0.312929	2.34957	2.6016	1.16258	3.1558	2.18565	2.2563	1.96502	3.07353	2.68802	0.918681	2.14638	2.00143	2.37004	1.92956	2.72601
AVPR1A	0.127465	0.183621	1.5544	0.0848957	0.268054	0.121776	3.32361	0.259941	0.189383	0.105225	0.883804	0.595987	0.0765449	1.76958	1.07027	0.282072	0.207243	0.0239891	4.14376	0.0548914	7.72935	0.106344	8.21074	0.334512	5.97071	4.35517	0.10606	1.30405	1.19013	0.0964634	1.8769	0.975885
AVPR1B	0.16876	0.147586	1.29625	0.0796161	0.415109	0.970955	0	0.209256	0.367935	2.06527	1.65743	0.340008	0.654208	1.61978	0.0435762	0.232295	0.15893	2.46712	1.34869	0.237353	0.881597	0.973568	0.251293	3.87361	0.78231	0.816238	0.269957	1.36346	2.28859	0.112389	0.326056	0.563372
AVPR2	1.42436	2.87868	0.590505	1.93364	0.784671	1.0575	1.91694	1.84605	1.47995	2.12994	0.288193	0.654488	0.771554	1.07741	0.495132	1.65336	1.5528	2.04807	1.80568	0.373196	1.09337	1.48073	1.86601	0.89109	1.32471	1.06875	0.269008	0.171752	0.632061	2.69652	0.607385	1.56783
AWAT1	0.893499	0.141579	0.562612	0.219385	0.191622	0.0434719	0.0177731	0.0624194	0	0.0770498	0.534509	1.44776	0.161945	0.0771814	0	0.496371	0	0.0792629	0	0	0.0471257	0.111007	0.100748	0.0215535	0.129226	0.0664482	0	0.157043	0.0524574	0	0.0300628	0.449895
AXIN1	4.49595	4.02801	4.51366	4.2872	3.32405	4.76887	4.33169	4.26273	3.64518	3.54494	4.0032	4.50863	3.6473	3.71209	4.18992	5.11922	2.42603	3.97685	4.77493	4.17199	4.76563	3.90159	5.2413	4.40442	4.61572	4.79761	3.89147	3.67081	4.0951	4.10102	4.65472	4.99881
AXIN2	2.88585	3.04877	3.99081	3.26445	3.22603	0.443008	2.78457	2.77945	1.89777	3.58229	2.0919	3.82525	3.31548	4.58253	2.31372	3.90676	1.42944	3.5334	3.37563	3.43526	3.91943	3.46968	2.93009	0.790791	4.41042	3.24923	2.36301	3.59712	3.5582	1.70403	2.63082	1.55687
AXL	0.120568	0.214021	0.24494	0.223873	0.085303	0.238066	0.178487	1.63442	2.0808	0.162763	0.138483	0.245062	0.250073	0.236262	0.124879	0.100233	0.155012	0.198767	0.154802	0.0627985	0.248238	0.367477	0.178513	0.201353	0.309328	0.214416	0.0686623	0.175633	0.166185	0.165405	0.197813	0.156227
AZGP1	4.44134	0.122351	4.39873	2.32031	0.700659	0.621955	0.0284458	3.62753	0	1.68304	1.22385	0.514206	3.68029	0.260102	0.0741079	0.712114	0	0.465145	0.0643769	0.247239	0.0354663	0.540123	0.17366	4.97179	0.31413	0.04654	6.32761	0.203279	0.238536	8.1169	0.188243	4.59738
AZI2	3.8676	4.2341	4.61829	4.4114	4.24985	4.51698	5.12051	3.75357	3.90915	4.20164	4.18744	4.64704	3.86124	5.10153	4.11879	4.05745	3.41502	3.66915	4.87667	4.20979	4.95113	4.93053	3.64749	3.62752	4.91523	5.27767	3.24507	4.14466	4.1771	4.27605	4.88351	4.46948
AZIN1	5.85102	6.33752	7.57184	7.44917	6.95105	7.26229	6.63679	6.35664	7.32764	6.96406	6.92378	7.36982	7.19179	6.72581	7.41699	7.04863	5.45038	7.51479	6.93826	6.28394	6.89477	6.43206	6.3777	7.64027	6.78386	6.78338	5.87638	6.35802	7.32196	7.87133	7.70325	6.78968
AZIN2	0.165097	2.18026	2.53298	0.688118	2.09929	0.134809	0.895608	1.45888	2.64834	2.73181	0.588504	1.68751	0.398561	0.694023	1.46646	2.61043	1.32316	1.88057	1.30289	0.910403	2.32123	3.29908	1.42864	1.86783	2.36787	1.60186	0.123079	1.50539	1.42986	0.790985	0.310717	0.840477
B2M	10.4347	7.53135	8.21036	8.4847	7.27377	9.33808	10.1748	6.91064	7.5241	8.45268	7.96352	7.41264	8.63363	6.89544	8.73272	8.41219	4.63692	8.64217	11.1455	7.66024	11.1828	9.73442	10.1058	10.1258	11.0286	11.0349	7.53775	9.58175	9.47285	9.63308	8.73079	10.4146
B3GALNT1	4.47065	3.59283	3.62542	5.39734	5.79849	4.3031	4.94679	3.17382	4.04326	3.7958	3.53863	3.45976	4.08618	5.22257	4.8982	5.05538	3.31175	4.14732	3.19437	2.59152	3.89837	3.54806	4.5219	4.08395	3.69327	4.12392	0.654253	4.18737	3.95249	4.8098	5.07221	2.97247
B3GALNT2	3.66052	3.92659	3.91113	4.05878	3.78607	4.18147	4.21954	3.24594	4.05455	3.74608	3.26788	4.11149	3.26876	3.7661	2.92194	3.99728	3.11696	3.9733	4.29453	4.42823	4.24004	4.08169	3.94832	4.67467	4.3076	3.89881	2.85228	4.33483	4.51668	3.49253	3.22968	3.97208
B3GALT1	0.156086	1.95739	1.84677	1.33043	1.0126	1.44566	1.59003	0.663126	0.560767	0.951654	1.78812	1.36565	0.339281	3.82235	0.291467	0.896206	0.864034	1.73324	0.22746	0.309807	0.678051	1.21577	0.615894	0.343587	1.02532	0.716954	0.192531	1.88786	3.15097	0.5102	0.899452	0.337004
B3GALT2	1.95334	1.85382	1.83256	3.42482	3.99243	0.119491	1.37233	0.220928	0.330666	1.35173	0.594513	1.3877	1.52533	4.8285	2.2463	0.798241	0.162651	0.104726	0.0728334	0.821581	0.0620186	0.121207	0.569074	0.174343	0.136948	0.139552	1.90859	0.0467269	0.0821595	0.39697	4.47281	0.0508551
B3GALT4	1.62575	1.02247	2.23299	4.07472	2.56483	2.72148	0.767046	2.8342	2.24405	2.69449	2.24428	1.56226	2.67185	1.32659	3.07782	3.40714	0.931731	2.17877	3.58076	2.69904	3.91604	2.30816	3.43692	2.7597	3.80168	3.77605	3.09255	3.43485	3.79399	2.43153	3.61481	3.47101
B3GALT5	0.161843	1.65098	1.03712	3.2712	1.90111	0.671545	0.362927	1.52647	0.415249	0.611692	2.25947	0.0915992	1.36768	0.130777	0.172254	0.929376	0.0985234	1.50996	1.69547	0.640498	3.79799	1.05337	0.604231	3.49567	4.17596	1.85868	0.302591	2.75996	3.50572	2.03123	0.558713	0.666886
B3GALT6	3.26242	4.61681	5.06381	3.80603	4.26654	5.05632	4.00093	4.77677	5.14098	4.16563	4.42114	5.317	3.79021	3.74729	3.81897	5.58319	3.04147	3.80905	4.96363	4.5672	4.66438	4.55078	4.31348	4.5902	4.43664	4.43324	4.37925	4.79399	5.13559	4.62674	3.78009	4.3926
B3GAT1	0.703065	3.48245	2.69636	0.244177	3.30056	2.95247	3.53944	1.88511	4.62165	2.11104	1.04803	1.78269	2.91944	4.43429	2.80837	3.66677	3.00062	3.82664	3.3578	4.16813	5.96561	4.72355	2.40507	0.959724	6.08485	5.49767	3.52086	1.20318	1.53233	1.87789	2.97036	1.7442
B3GAT2	2.0161	2.75915	1.99904	0.763121	0.967304	1.13112	0.715366	0.225882	4.94104	2.31984	2.12875	1.45927	1.00492	6.8718	0.21261	0.496017	3.16601	1.51406	0.737735	0.48758	1.45778	1.05944	0.700135	0.576957	0.787481	1.10724	0.316266	0.896899	1.92082	0.301797	0.7718	0.294673
B3GAT3	6.76887	4.70542	5.47339	6.83328	6.21874	5.73731	5.34915	5.50658	5.43353	5.27876	6.11387	5.32623	5.91525	5.27543	5.63835	6.06064	4.54937	5.17766	6.30095	4.64118	6.07628	5.2022	5.79757	4.44193	5.76863	5.85797	5.24367	5.57665	5.92141	5.67038	6.32143	6.00827
B3GLCT	2.61767	3.5979	3.13112	2.77304	2.03725	3.65681	2.95344	2.90364	3.75318	3.70655	3.00312	3.21615	2.27971	2.50331	4.25862	3.54251	2.28163	3.41771	3.49867	2.55744	3.39869	4.00955	3.21703	2.54437	3.38234	3.19057	3.11565	2.89355	3.02656	2.94281	4.56558	2.91835
B3GNT2	4.91253	4.45036	4.33718	3.89211	2.78432	4.87274	2.72913	3.2652	4.99943	5.12107	5.25164	4.20133	4.27339	2.90991	5.19718	3.76042	2.53233	5.18126	4.98255	3.98897	5.99549	4.52361	4.09808	6.13448	5.97191	5.25509	4.3242	4.5812	5.33029	4.65418	4.76404	4.23434
B3GNT3	0.542606	0.0219477	0.0676418	0.646171	0.0106664	1.06945	0	2.74421	0	0.0567241	0.041644	0.0124911	0.985866	0.0446434	0.0107283	0.057994	0	0.0306624	0.0555513	0.0332941	0	0.287833	0.248729	0.418629	0.0737524	0	0	0	0	1.49064	0.307819	1.85778
B3GNT4	0.847529	2.97494	2.01092	1.89036	1.26261	1.77237	1.13962	1.1002	2.01028	0.929638	2.26195	2.38974	1.02774	1.31899	1.18143	0.625981	1.51411	0.899406	1.04809	0.973952	1.32008	1.19818	1.01591	1.08689	0.95091	0.657181	1.01387	0.643399	0.5054	2.3355	0.923278	1.40792
B3GNT5	4.30723	2.09254	6.19933	6.22455	6.21061	6.62828	2.28667	4.43423	3.76947	2.97775	4.5253	6.2437	6.43404	3.6167	6.34448	4.35377	0.631766	2.70861	3.60999	6.6247	3.21781	3.37147	3.6513	0.221015	3.54296	2.44323	5.9883	4.54624	4.72067	5.43163	7.43452	6.3398
B3GNT7	0.16526	0.468759	1.54877	0.75326	0.52421	1.75276	0.908843	2.44203	2.51369	1.63531	0.967304	1.12613	0.477046	1.27291	1.1417	0.742689	0.415641	0.698876	1.43113	0.895274	3.9614	1.10442	1.52105	2.75247	4.10366	3.41497	0.381921	2.83116	2.10311	2.02671	1.76986	2.20342
B3GNT8	0.616271	1.81584	2.15689	1.64576	1.17076	5.94353	0.586633	1.6306	1.67993	3.57065	2.32902	0.666881	2.27436	0.859492	4.55591	2.15779	0.718282	3.0811	4.18706	3.04875	3.63883	2.47842	4.78774	3.42027	3.28457	3.23842	3.46098	3.85216	3.85892	1.7634	4.02088	5.22414
B3GNT9	2.06495	3.52664	3.37825	2.18987	1.77473	3.56182	2.21402	2.73199	3.78918	3.64639	2.33976	2.97437	2.84238	1.56339	3.21786	3.32824	1.10922	3.26447	3.35326	3.12781	4.2647	3.63339	4.58107	4.08404	3.91289	4.01081	3.23171	3.41238	3.78976	1.75122	2.28159	4.03662
B3GNTL1	1.23853	1.77287	2.73329	2.43835	2.52365	1.75138	1.1674	3.13737	1.97339	1.15074	1.71926	1.99076	1.1056	2.68492	0.935514	2.30277	1.18007	1.83165	1.6852	2.62561	1.69595	1.931	1.07388	1.2402	1.80164	1.90021	0.8005	2.24066	3.70325	1.83744	1.84106	2.37933
B4GALNT1	0.201223	4.37977	3.88115	5.06397	4.67177	1.84559	4.27426	2.66983	1.67914	5.47889	3.67487	4.59441	4.05266	5.45836	5.15201	4.57819	3.52155	4.67723	3.64964	4.40337	3.83975	4.84775	3.40177	3.86722	2.85469	4.72033	2.66285	2.49806	2.82745	4.87732	5.68543	1.46841
B4GALNT2	1.65988	2.37714	2.63869	2.08518	1.71896	2.56611	2.14969	1.54588	2.45071	1.83475	2.62976	2.63045	2.48989	1.9082	0.973243	1.76887	1.43723	2.47267	2.89094	1.43289	3.14719	2.55771	2.2348	1.82855	3.19358	3.12891	0.860899	2.32459	2.60394	2.21053	1.69084	3.26296
B4GALNT3	0.560054	5.20466	2.06828	3.10667	3.87836	3.3806	2.78415	3.76248	5.35487	3.9664	2.40557	3.31021	0.436339	5.27012	3.61228	2.73131	4.4949	4.7879	3.45313	1.65995	2.94128	3.45792	4.78169	3.83877	2.25555	1.70706	3.08659	1.17324	1.61514	4.25378	4.26832	3.23417
B4GALNT4	4.34309	3.68605	5.91359	4.19901	6.17996	5.03616	4.85166	3.46994	5.89489	3.64571	5.49944	5.82701	4.65166	6.2608	4.12412	5.37765	4.59252	4.01206	2.63162	6.36558	1.70434	4.68926	3.90907	1.52549	2.59375	1.12568	3.32869	1.65255	2.13776	5.79781	3.41731	5.55421
B4GALT1	3.79799	3.97001	4.41891	6.57375	4.53684	5.20892	5.4648	4.53684	6.19601	4.41433	4.33966	3.91472	4.65333	3.10254	5.99787	3.91542	3.31318	4.78865	5.48274	4.07006	6.00772	3.97921	5.42847	5.06131	5.68558	5.21108	4.98351	5.00422	5.63144	5.43758	6.65659	5.5664
B4GALT2	5.9238	5.63642	6.05972	6.00458	6.67841	5.97267	6.10022	6.27426	6.31852	5.85391	4.83117	6.2013	5.2568	5.67802	5.53245	6.86877	5.24043	5.71085	5.32622	5.63609	5.30884	5.97691	5.55193	6.23291	5.18451	5.32225	5.65469	5.78701	5.9617	5.21648	5.38403	6.82815
B4GALT3	5.22766	4.9445	5.40659	6.1405	6.20937	5.3231	5.7122	5.12013	5.00562	5.05329	4.73324	5.53825	5.46572	5.58413	5.5865	5.43395	4.3829	4.20687	5.55878	4.94801	5.38779	5.4979	5.24168	4.83739	5.23567	4.86344	5.04741	4.75593	4.92069	4.98234	6.38341	5.26331
B4GALT4	2.84481	2.66152	4.40953	5.0572	4.55716	4.60768	3.80343	4.69572	3.73944	3.80504	2.96177	3.53001	3.85325	3.49988	3.78917	4.55551	1.4231	2.87058	3.90133	3.76915	5.07635	3.48363	5.1679	2.59068	4.4038	4.34096	3.8884	4.53222	4.74921	4.21536	4.29834	4.77773
B4GALT5	6.6404	5.23073	5.88032	5.95113	6.76416	6.28823	5.75903	5.61892	5.84087	5.20821	5.96948	6.08841	5.322	5.63322	4.85702	5.85649	4.46491	4.72342	5.70281	5.93937	5.73712	5.61507	5.21128	6.71023	5.62021	5.65904	5.57838	6.12452	6.18768	6.15645	5.14614	5.85673
B4GALT6	3.06261	2.39719	2.90545	3.94994	2.963	2.58415	1.98967	2.07954	1.05538	3.17605	3.29184	3.43358	3.3492	2.66641	2.41154	3.24707	1.65462	3.77321	3.10406	3.13541	3.19624	2.09285	3.12688	0.27985	3.14891	2.77883	2.17854	3.60776	3.70826	3.1773	3.74808	2.95625
B4GALT7	3.60177	3.62293	4.05901	4.51689	4.10491	4.69534	5.11024	4.38729	3.63455	3.95721	3.70333	4.00183	4.1512	3.58998	3.94497	4.48469	2.3721	3.04019	4.08157	4.17709	4.72501	3.49985	4.41854	3.55682	4.73724	4.83308	3.95608	3.60055	3.75336	3.14695	4.13913	4.56722
B4GAT1	4.90507	3.90112	4.13338	4.45292	4.79865	3.43042	5.3816	3.49566	5.11429	3.90117	4.51004	4.34605	3.4392	4.64612	3.09242	4.37456	4.42002	4.10743	3.60543	4.12447	4.27756	3.20644	3.95061	4.33842	4.3757	3.86101	2.75292	3.85708	3.9793	2.97992	3.9323	2.94485
B9D1	4.0922	3.99739	6.63655	4.26025	5.22631	3.62605	2.52027	4.17359	5.27135	4.35965	5.3911	5.85943	3.66524	4.94262	3.85941	4.90539	5.41794	5.10046	3.87887	5.12121	4.50542	5.13776	4.45307	4.95561	4.69127	3.25415	2.1208	3.98574	4.35104	3.28285	4.67897	4.98749
B9D2	2.4945	3.54769	3.8948	3.2642	4.15405	4.37559	2.6166	2.80883	3.85532	4.65156	3.36711	3.60206	2.56837	3.13277	4.65573	4.52424	2.2878	4.08928	4.7243	3.66126	4.36579	3.55584	3.8388	4.31672	4.57503	4.33992	2.82956	4.06898	4.1065	4.17402	3.99566	4.22311
BAALC	2.80584	4.41022	3.16269	6.68862	5.33154	1.21307	2.55769	1.41025	4.86955	6.18889	4.06074	0.904732	6.22669	6.70388	4.66517	2.23818	3.25844	7.47768	4.62316	3.89761	4.6311	6.84799	5.70353	6.95158	4.33058	4.07079	3.57068	2.10694	2.4591	3.308	5.17214	2.3243
BABAM1	5.85611	6.48144	5.9162	6.09861	6.12565	5.787	6.0773	5.6028	5.58324	6.69217	5.48297	6.12988	6.53692	6.18957	6.59256	6.41086	4.67712	6.08726	6.1196	6.14356	6.10797	6.01774	5.93866	6.02235	6.06773	6.32126	5.78893	6.09693	5.85138	5.83184	6.54846	5.45162
BACE1	4.80425	4.2491	4.09556	7.08449	4.50471	5.0922	4.6515	3.27989	5.47282	5.04544	3.79093	3.58141	4.46422	3.53797	4.5613	5.68896	3.36457	4.58049	5.18864	3.52087	4.92054	4.54712	6.31903	5.83429	4.67741	4.96517	4.50897	5.15315	5.1413	3.6413	5.2646	4.12613
BACE2	0.0105262	0.786752	1.7637	2.83844	1.94654	5.59084	4.74912	3.62598	0.23219	0.200032	1.95051	3.32996	1.92574	0.256886	5.07992	1.31324	0.0351911	0.0952002	3.0573	4.43969	3.87699	2.74988	4.0881	0.075699	3.19309	3.26836	2.91164	1.53864	0.960027	5.182	4.19093	5.2443
BACH1	3.74129	3.50497	4.09118	4.03856	3.56727	4.22804	2.86554	3.44657	4.0537	3.36535	3.2431	2.86694	4.03108	3.92242	3.88581	3.44186	1.93502	4.10472	4.34266	3.87648	4.26282	3.54889	3.85122	5.04615	4.10677	3.90867	3.24486	3.35098	3.19738	5.25561	4.051	3.51751
BACH2	0.0403417	1.58184	0.523927	0.355949	1.26087	0.61718	2.94054	0.469012	2.74857	0.857305	0.094065	0.225907	0.598618	2.93164	1.19982	0.747177	2.21699	2.40683	0.796214	0.763032	0.710987	0.460861	0.788396	0.110271	0.670077	0.491543	0.135275	1.41719	1.36454	0.522768	0.280736	0.918712
BAD	5.18164	5.42704	6.35402	6.66807	6.68323	5.8406	5.96428	5.97938	6.61472	6.02984	5.74894	6.32136	5.9387	5.52728	6.37287	6.42303	4.55407	5.99145	6.05523	6.18271	6.33253	5.70483	6.23217	6.53421	6.15465	6.46797	5.56175	6.24756	6.26912	6.09652	6.08559	6.33489
BAG1	6.04563	5.64772	5.9139	4.85817	6.56976	6.24153	4.99428	5.98309	6.04872	6.16001	5.79969	5.23	5.51931	6.71051	6.60337	6.48928	4.21413	5.82262	5.82186	5.7381	5.79162	5.61322	5.97261	5.73808	5.69974	5.70781	5.83949	5.91213	5.78596	6.32378	5.86754	5.36006
BAG2	2.47684	1.27114	1.33718	1.45848	1.91294	1.48858	2.88211	1.84725	2.38572	1.73689	2.70899	1.30192	1.4437	2.20313	0.8731	1.70252	0.749963	1.99971	1.74429	0.667481	1.63695	1.26116	0.550182	3.7809	1.57673	1.78756	0.405572	1.83238	1.70044	2.50246	1.33701	2.22026
BAG3	2.31106	2.50942	2.47736	1.42964	2.02768	4.30591	3.08581	3.42781	2.34707	4.55492	1.80437	1.10926	2.03207	0.987122	2.06756	2.24561	0.109877	4.63743	4.5276	2.84167	5.71552	3.71366	4.12028	4.0907	5.71771	5.06042	0.967659	4.09344	3.7002	3.42865	2.49837	3.8124
BAG4	3.00643	4.3173	4.61551	4.04246	4.08242	3.85085	4.27627	3.59424	4.61291	3.98145	4.21552	4.38231	2.70623	4.22596	3.88153	4.25351	2.84831	4.29182	2.976	3.47366	2.98839	3.53918	3.31641	4.18424	2.91783	2.78372	2.89949	3.0568	3.91779	4.49123	4.33511	2.01511
BAG5	4.33185	5.43305	5.48552	4.50617	4.97036	4.54743	4.54554	4.8171	5.51148	5.12462	4.63516	5.76482	5.01034	4.44524	4.68515	5.4935	4.26437	4.75099	5.30603	5.21352	5.08349	5.41713	5.07779	5.53639	4.8796	5.06649	3.57204	4.91071	5.08271	4.98235	4.73048	3.62847
BAG6	6.34429	6.51713	6.89677	6.55387	6.76002	7.3269	6.4519	6.91254	6.99236	7.09298	6.65332	7.15089	7.04788	7.03489	6.85439	7.23186	5.19794	6.90428	6.98224	6.75902	6.78849	6.56487	6.70405	7.21639	6.85359	6.99185	6.10227	6.70098	6.67021	6.56206	7.13753	7.4416
BAHCC1	2.71284	3.21375	5.75107	1.12653	3.94412	4.3217	4.36992	4.25487	3.1805	4.30497	3.74382	5.37792	3.58566	4.35477	2.55639	4.75207	2.92471	3.41508	5.1979	5.34383	4.99066	3.80338	4.04319	3.37061	4.88964	5.01127	3.04484	4.20222	4.68105	3.68766	3.10101	4.43486
BAHD1	2.64935	4.09317	3.35489	3.94191	3.29573	4.03727	3.4981	3.78234	3.49339	4.2204	2.87247	2.92101	3.37163	5.19761	3.47325	4.71326	2.2597	4.34569	4.45565	3.49801	4.55994	2.97643	3.55032	4.23126	4.34694	4.42118	2.75325	3.48574	3.52024	4.84481	3.97004	3.45766
BAIAP2	0.525201	4.1676	4.45264	0.309705	3.93706	5.13518	3.4828	4.00725	4.39325	4.76902	3.17524	3.89193	1.52985	5.00045	4.69133	3.65774	4.06835	3.78928	4.94046	2.88277	5.18979	4.0345	4.5235	4.55622	4.99584	4.99756	2.57142	4.483	4.96817	4.34712	4.27546	4.14786
BAIAP2L1	5.95248	3.67167	4.85972	5.50157	5.53013	5.48951	1.87996	5.47667	4.70778	3.14638	5.10344	5.19482	5.69013	1.84965	4.304	4.98424	1.50624	4.17237	4.49769	4.9885	4.64489	4.11187	4.83472	4.29777	4.65678	4.07893	5.04418	3.99903	4.5622	5.17149	5.45385	5.3771
BAIAP2L2	1.54646	2.23186	2.87103	2.75525	1.45322	1.69816	1.43361	3.34553	6.17984	1.29316	1.8933	2.27816	1.0888	1.52541	0.417665	1.13536	3.201	1.92955	1.30733	1.33152	1.30672	2.32488	1.26069	3.06342	1.4979	1.33183	1.1698	0.727679	1.04532	0.712407	1.33767	1.30218
BAIAP3	0.939056	1.67944	2.28522	0.72734	0.243343	2.64815	0.471195	3.68657	1.10384	0.591911	2.11729	1.34443	0.647304	0.616637	0.853919	4.52551	0.89805	0.711119	2.17776	2.33671	1.66244	0.668136	1.57388	1.81802	2.04128	2.62047	2.80391	0.484862	1.28303	0.45431	0.689821	3.38704
BAK1	3.84147	3.67708	4.35223	3.59325	3.99215	4.36119	4.05055	4.52084	4.60016	4.27863	4.00632	4.68229	4.18648	4.55726	4.7653	4.52686	2.64423	4.03756	3.87431	4.08716	3.87206	3.62137	4.92377	4.22744	3.45434	4.35515	4.32792	3.7989	3.9198	4.18532	4.09585	4.16697
BAMBI	4.90742	0.670195	3.80511	5.61728	4.04937	1.98686	1.27131	3.42051	5.17349	4.85562	3.87435	2.4059	4.64316	0.624564	4.42215	5.64845	0.21696	4.72245	5.96608	1.18813	5.60364	2.56467	3.27389	6.51347	6.38545	4.707	4.41095	3.93977	5.11914	1.95953	5.3831	3.74572
BANF1	7.94075	6.79739	7.58632	7.55792	7.78421	7.18287	7.57367	7.21179	8.29779	7.38837	7.44725	7.87808	7.30243	7.77545	7.75162	7.9839	6.47613	7.503	7.54566	7.30456	6.80277	6.87346	7.32415	8.04656	6.71047	7.26912	6.63188	7.59597	7.67576	7.95817	7.71983	7.3467
BANK1	1.70939	1.21203	0.10936	1.35677	0.535596	0.71811	0.00774379	0.479412	1.63513	0.66823	0.56632	0.00954387	0.314228	0.247752	0.162959	0.300744	0.792195	0.839766	0.89312	0.253688	0.981941	0.824922	0.434986	0.109835	1.20863	0.817978	0.257735	1.1455	0.941328	0.969012	1.01743	0.521449
BANP	3.07553	3.28008	3.33884	3.65644	2.65386	3.61777	2.76653	3.12991	3.30523	3.56572	2.82775	3.38402	3.45229	2.89335	3.36119	4.29376	2.55255	3.35043	3.75631	3.32317	3.4025	3.63839	3.27298	3.25439	3.42582	3.18658	2.40311	3.48933	3.57492	3.58971	3.95487	3.71658
BAP1	4.98772	5.76754	4.87842	5.12655	5.04546	4.39574	4.90899	4.71867	5.10267	5.16077	4.25085	4.91133	4.14631	5.11916	4.05261	5.22559	3.53738	4.59894	5.65681	4.70248	5.74788	5.47694	4.41277	4.85013	5.73316	5.89215	3.98425	4.85978	4.99437	3.50305	4.74082	4.54022
BARD1	3.24685	4.10973	4.64315	2.97292	3.56195	4.73406	3.65753	3.7911	4.56702	4.82871	4.01343	4.44324	4.72563	3.88465	4.95572	4.68222	1.90071	4.83159	3.89619	4.23411	4.72728	4.07298	4.35433	5.54281	4.80827	4.41697	3.97185	4.25809	4.57288	4.63742	5.10601	4.1616
BARHL1	0.0424806	2.06879	1.01198	0.0335624	0.0976938	3.69913	0.0490217	0.438915	5.09898	2.45733	0.220154	0.557643	0.175302	0.478469	0.344747	1.864	4.49321	5.01901	0.198037	1.27887	0.0343505	2.00009	0.143064	0.259019	0.17446	0.132752	0.546783	0.123162	0.198143	0.134198	0.157994	0.0905883
BARHL2	0	1.54694	0	0.170397	0.980379	0.147683	0.875358	0.241021	1.81155	0.0268425	0	0	0	0.0126849	0.322444	0.770725	0.741835	0.103896	0.703657	0	2.00639	0.0270887	0.0450284	0	1.91165	0.698683	0	2.10516	1.37102	0	0.496208	0
BARX1	2.46133	5.15458	6.79	0.672764	6.56804	6.28488	5.17886	6.07359	4.35784	2.43929	6.25604	6.37208	6.88468	5.9858	6.18157	6.68294	1.86452	6.22129	3.8014	7.25498	2.05862	0.830567	1.22659	5.81536	1.83839	3.08122	6.06402	3.70275	4.21164	0.431462	7.08254	6.12239
BARX2	0.0273339	0.970685	0.382202	0.421161	0.0875594	3.64252	0.0916334	2.28266	0.48499	1.46704	0.646952	0.01665	0.2041	0.45289	5.66134	1.21206	0	0.209809	3.18984	0.564679	4.54089	4.61767	4.82323	0.176799	4.02028	3.84087	0.0918963	0.848359	1.73582	6.16475	4.59424	3.06015
BASP1	5.99076	8.03633	7.67189	5.71057	7.06212	4.4817	6.63741	4.29327	3.33087	8.23737	6.22401	6.5088	7.3866	9.20355	5.19544	7.2736	3.7863	9.16185	5.42988	7.71193	7.65603	7.11576	5.78373	4.8745	8.02985	7.16918	4.64685	7.83892	8.21307	3.50526	7.0667	0.607517
BATF	0	0	0.0345899	0	0	0.025836	0	1.14474	0	0.026802	0.089129	0.0260964	0.17512	0	0	0	0	0	0	0	0	0.060283	0.0282447	0.0597454	0	0.0466249	0.107233	0	0	0.423903	0	1.16102
BATF2	1.99717	0.266442	0.603798	1.84895	0.135904	0.515056	0.0534441	1.34899	1.21007	0.478643	0.298278	0.339131	0.306217	0.374302	0.097384	0.55238	0.136185	0.679531	1.8847	0.0524681	2.53732	0.215056	1.95819	0.624454	1.95829	1.9119	0.623117	1.12163	0.787462	0.519298	0.241451	1.57883
BATF3	0.573503	2.98423	2.55904	0.962728	1.30877	1.31346	3.67248	0.643112	2.00248	1.69613	1.48228	1.75737	1.54361	1.99313	0.706082	1.8685	0.539884	1.34947	0.475902	1.09308	0.476864	1.11452	0.780461	2.01384	0.76962	0.436979	0.391203	1.63669	1.20601	0.0647234	0.613828	1.97658
BAX	6.39225	6.99603	7.12942	6.42343	6.7576	6.8846	5.84821	6.23758	7.05698	7.64769	6.94523	7.39261	6.73429	5.80596	5.63828	6.91398	5.18983	7.43602	7.04402	6.37731	6.76058	6.61656	6.8561	7.21637	6.57717	6.9199	6.38058	6.80425	7.03203	6.03882	6.7754	5.91281
BAZ1A	4.10575	4.88304	5.07455	3.54364	4.49907	4.52857	4.73574	3.93724	5.05853	5.62548	4.16385	5.73417	4.08114	5.22797	3.40789	4.68863	3.59854	4.32898	4.55927	4.79511	4.16803	5.05626	4.33602	3.81169	4.21038	3.5126	2.25976	4.58412	4.57779	4.63221	4.19755	3.38695
BAZ1B	4.80747	5.88265	5.0505	5.45965	6.64288	6.10532	5.00857	5.39225	5.95721	5.6934	4.33963	4.95168	5.61833	5.37148	5.53188	6.21687	4.3459	5.89903	5.8893	5.79573	5.78835	5.70083	5.83622	5.60463	5.57661	5.2208	5.1853	5.70692	6.2325	5.41528	5.93816	5.84644
BAZ2A	4.3691	4.79703	5.4371	4.75308	5.54903	5.46611	3.71238	4.92789	5.35607	4.99585	4.6386	4.95105	4.73165	5.11086	4.36241	4.91751	3.49203	4.72999	5.12023	4.63998	5.11059	4.23071	5.12544	4.8078	5.00274	4.5512	3.81237	4.65532	4.92468	4.50821	5.32062	5.40566
BAZ2B	3.02853	3.02132	4.76286	3.08488	4.205	4.38732	1.78611	3.64988	3.5456	3.42711	4.29844	3.77707	4.17633	1.84425	3.14964	4.40078	0.980484	4.08768	3.45516	4.5219	4.13701	3.18045	4.31999	4.53338	3.9745	3.57664	2.82706	3.80184	4.51495	3.37175	4.75821	3.45873
BBC3	2.15006	2.41352	2.36716	4.45252	2.57137	4.4442	3.35775	2.77181	1.9308	2.50878	2.78168	2.10161	3.38067	3.96488	4.48972	3.41885	1.06768	3.7949	3.82432	2.69506	3.82369	2.04976	4.93968	3.35084	4.10175	3.80402	3.30924	0.951354	2.2053	4.01836	4.10729	3.6721
BBIP1	3.75058	4.42803	5.14271	4.8695	5.19087	4.32999	4.04431	4.47746	4.28238	5.2076	4.23151	5.02393	5.18375	3.8809	4.46918	6.05414	3.21791	4.7899	4.80843	5.42219	4.99208	4.53959	3.97632	3.69737	4.86202	4.85695	3.16574	3.66792	3.91938	3.42508	5.24341	4.77614
BBOF1	0.437328	2.97801	4.23996	1.81871	2.49	2.63125	1.50607	2.12699	3.89908	2.99436	2.75884	3.47814	2.18376	1.84876	1.26311	3.76106	3.07157	3.10187	3.02714	2.02281	2.98309	3.75959	1.79503	2.64341	2.81999	2.52354	0.75446	2.68597	2.87504	2.44716	2.24634	2.26131
BBOX1	0.0606504	0.0961747	0.655098	0.429901	0.424256	1.51834	0.0320857	0.128015	0.0415696	0.180152	0.207501	0.145693	0.220444	0.874437	1.1854	0.192619	0	0.118272	1.51077	0.247265	1.78816	0.402127	0.952171	0.456861	1.35191	1.11312	0.154393	1.65285	1.49162	2.47809	1.87327	0.906286
BBS1	3.40959	2.51336	4.0367	4.41256	4.29945	3.53434	2.67271	3.87335	4.19621	3.32492	3.36357	3.30645	3.91773	3.59776	2.95774	4.77095	3.17136	4.47272	4.31834	3.7225	4.97574	3.69558	4.42704	3.55281	4.89706	4.60012	2.28182	3.97934	4.14435	3.61605	4.52279	4.64218
BBS10	3.36897	4.03177	4.19168	4.11748	4.17888	3.71892	3.6063	3.05289	4.45067	4.01327	3.46238	4.19454	3.72218	4.90972	3.91169	4.29207	3.30745	4.70326	3.71565	3.87134	4.12657	3.56133	3.49011	3.53514	4.29023	3.88709	2.88482	3.69366	3.83297	4.0649	4.90638	4.13666
BBS12	1.13722	1.47488	2.00384	1.47275	1.56764	1.24474	0.713159	1.44025	1.22245	1.85647	1.27644	1.51099	0.415956	0.837839	1.75758	2.7582	1.66616	1.21325	1.42471	1.63523	2.07885	1.43007	2.01219	1.51449	2.37657	1.75231	0.60143	2.20812	2.14218	1.25635	2.25994	1.75774
BBS2	3.37969	4.12644	4.81682	4.23295	4.17859	3.58646	2.86908	4.13912	4.15747	3.8128	4.12784	4.50057	4.14543	3.39046	3.68191	5.03727	3.72548	4.15282	4.00121	4.10329	3.95435	4.77277	4.66641	3.72871	3.75878	3.81445	2.53904	3.78514	4.47785	2.72036	4.74149	3.89917
BBS4	3.32818	3.33285	4.18128	3.46582	3.58403	3.06928	4.32346	3.3452	3.31584	3.3735	3.26962	3.70288	3.53233	3.63949	2.1774	4.51246	2.96334	3.37186	3.46617	3.85692	3.38745	4.0139	3.16378	3.4243	3.50643	3.32176	2.16632	3.17276	3.68676	4.10424	3.48805	3.34767
BBS5	2.05584	2.57041	4.06747	2.77235	3.64856	3.02323	3.31661	3.27471	3.95536	2.99007	3.2301	3.7751	3.14011	3.35799	2.40703	4.03826	2.00544	3.04998	2.18675	3.2157	3.27107	3.27046	2.34382	3.14967	3.16212	3.09773	1.64937	2.52069	2.95121	2.80433	2.9008	3.35249
BBS7	3.25517	4.02508	3.95253	3.61463	3.80262	2.84339	2.71286	3.03733	3.16535	3.62058	3.20769	3.38442	3.67997	3.19715	3.77908	4.10028	2.64007	3.0162	2.75099	3.05302	3.56414	3.15657	3.56648	3.10068	3.34836	3.09797	1.93731	3.17016	3.31489	3.12057	4.07727	3.19756
BBS9	1.49425	2.02644	2.91176	2.11041	2.93037	2.63909	2.06532	2.31377	2.53087	2.60489	2.46616	2.32616	2.46704	1.8885	2.11838	3.23312	1.08952	2.46881	3.22421	2.75115	2.67667	2.7914	2.01001	3.0464	2.74419	2.56766	1.86016	2.77983	3.36554	2.02174	2.75541	1.65369
BBX	3.20862	3.20422	4.24781	4.59981	4.55472	3.91037	3.33453	3.38932	3.2487	4.0832	2.77557	2.65127	3.49758	4.03979	3.90953	3.31687	2.09434	3.81623	4.46853	3.98822	4.71964	3.62586	4.20616	3.26094	4.61506	4.52475	2.53709	4.75106	4.91225	3.32568	4.62424	3.77977
BCAM	6.07362	1.02485	3.17391	7.35556	5.06959	5.37644	3.93408	4.23912	3.34988	1.56428	5.57222	1.71022	4.85663	3.37847	2.45057	4.3984	0.0657973	4.66185	3.76992	2.36602	3.95523	0.933205	4.74954	5.99675	4.67159	4.632	5.37646	2.59682	1.62325	4.8993	3.01961	8.75393
BCAN	1.06666	0.23281	1.0487	1.79904	0.0837654	0.614322	0.983546	1.00046	0.188772	0.104547	0.0726739	0.013157	0.443838	0.366267	1.01784	0.818298	0.137432	0.0929742	0.146906	0.182119	0.128399	0.0707446	0.329679	0.0443575	0.0921365	0.0265928	0.638584	0.0156572	0.0212421	0.134824	2.12553	0.335342
BCAP29	4.82283	4.78724	4.28773	4.87468	4.87535	5.2124	5.09072	4.47077	5.65439	3.79479	3.77057	3.88199	4.50307	4.79143	4.91685	4.88749	3.09965	4.60522	4.56043	5.45598	4.67865	4.95876	3.66762	5.30272	4.72171	4.40735	5.26761	4.97697	4.94871	5.10963	5.02564	4.67422
BCAP31	7.33323	7.64993	7.60724	7.49641	6.99787	7.08458	6.97292	6.88374	7.85844	7.07425	7.3174	7.5092	6.25162	6.20749	7.32654	7.00154	5.51958	6.36525	7.83764	6.32531	7.60598	6.25341	7.72063	7.69635	7.44445	7.15961	6.57407	7.28129	7.3858	7.35621	7.49316	7.95913
BCAR1	4.3759	5.6311	4.12486	3.81793	3.76472	4.59148	3.53456	4.81797	4.79751	5.71708	3.21275	3.81353	4.1708	4.65071	4.06645	5.44761	4.64659	5.64241	4.24568	3.44694	4.48605	4.59586	5.02004	4.72074	4.02901	4.37111	2.60802	4.90933	5.45105	4.83461	4.45658	5.09497
BCAR3	1.35236	1.34684	2.63068	0.783788	1.02695	2.49927	1.21205	2.26237	3.31123	2.27127	1.40099	2.20494	1.55465	1.09227	1.62465	1.69914	0.424535	4.17107	2.99243	2.11993	4.05573	4.7303	1.89412	3.66872	4.48857	2.52752	1.04166	2.97534	3.92828	0.657238	2.17374	1.61305
BCAS1	0.00160471	0.752608	0.116238	0.0901418	0.0681607	0.399834	0.102428	2.82056	0.689597	0.100968	0.0352555	0.215069	0.267602	0.696193	0.0228234	0.0858956	0.307975	0.0795098	0.185584	0.222067	0.228893	0.246664	0.190627	1.78941	0.25378	0.0691948	0.0624932	0.117212	0.0489822	0.654437	0.0353399	1.48028
BCAS2	5.22001	5.69425	6.45768	5.54645	6.10033	5.75361	4.55775	5.05217	6.43629	5.98839	5.48153	6.34953	5.57697	5.16898	5.93509	6.31766	4.65138	5.6355	5.54106	5.49726	5.49683	6.24765	5.55773	5.69065	5.66491	5.15308	4.83467	5.62311	5.86808	5.73139	6.1663	4.77268
BCAS3	4.75423	3.6128	5.60978	4.84703	5.29081	3.73644	3.53249	3.06315	3.26002	4.25618	4.40251	5.00315	4.9064	4.67178	4.17076	4.15777	2.46236	4.82251	3.39733	4.02296	3.30702	2.76498	4.4863	3.45814	3.3642	3.44561	3.28418	3.84222	4.4456	5.02298	4.68042	3.40099
BCAS4	0.62919	2.66481	2.59328	2.65595	2.8701	1.66556	2.66652	2.61834	3.10858	1.50877	3.02623	3.14461	1.4131	2.3953	2.74211	2.7167	1.44248	2.55549	1.39662	2.27623	3.28739	1.52307	3.50402	1.96009	2.77805	3.85644	0.456116	1.16191	1.58604	1.45699	3.00377	2.51891
BCAT1	0.220692	1.68568	0.478685	0.333171	0.446404	0.765189	4.19654	2.93607	4.71796	0.741362	1.41802	0.411816	0.364898	5.89054	0.269589	0.141636	3.26069	4.25303	0.334689	0.376708	0.485459	0.967156	0.403788	0.31569	0.575774	0.526992	0.292374	0.349729	0.276875	6.71286	0.328287	0.838176
BCAT2	5.90865	5.33232	5.44212	5.78012	6.00459	5.30512	4.49287	4.88461	4.47873	5.73706	5.40653	5.45478	5.76024	4.56883	6.09071	6.04336	3.27474	4.96549	5.26655	4.84355	5.16228	4.82253	5.7758	5.73636	4.70929	5.21793	4.67359	5.75731	5.44199	3.62459	6.70287	5.08547
BCCIP	5.55389	5.77565	5.5758	5.30175	5.58994	5.55655	4.91927	5.89018	5.28552	6.11422	4.887	5.55891	5.85597	5.96388	5.65621	6.43115	4.23534	5.65358	5.9533	5.8572	5.79737	5.39589	5.0892	5.43218	5.7493	5.69976	3.63807	5.26445	5.25444	5.57993	5.93532	6.87578
BCDIN3D	1.41565	2.74781	2.79536	2.61328	3.08729	2.67151	2.2989	2.10772	2.9371	2.88496	2.51289	2.37838	1.9895	2.70212	2.52262	2.90828	1.7201	3.22145	2.78697	2.56796	2.6125	2.72717	2.1214	2.94543	2.65395	2.37203	1.92799	2.45239	2.82331	2.56125	2.73295	2.75132
BCHE	1.1966	0.0251459	2.17134	3.14636	5.03496	1.9465	3.76032	0	0	0.056719	0.301547	1.9063	0.0375367	2.41731	0.505612	0	0	0.0162305	0	3.5942	0	0	0	0.0463628	0	0	2.64255	0	0.141012	0	3.56121	0.13994
BCKDHA	5.17729	5.23623	5.54902	4.38348	4.78553	5.77712	3.01014	4.39504	4.75921	4.88338	4.01811	4.94444	3.93454	5.02727	5.49843	5.19182	3.19284	5.05529	4.14793	4.66879	4.53549	4.07367	4.74242	5.26839	4.64466	4.98683	3.95217	4.5201	4.53936	4.90693	5.29575	5.14912
BCKDHB	4.69843	3.6215	4.36479	4.46628	3.7263	3.9873	2.77261	4.39382	4.9493	3.45967	3.62093	4.07926	3.75756	3.65077	3.03619	4.12428	2.62934	2.17571	3.95031	3.38245	3.6631	3.1375	3.73498	4.44096	3.52274	4.1252	3.22908	3.86295	3.92097	3.28848	4.62293	3.22286
BCKDK	5.441	4.36832	5.23242	5.3676	4.47869	5.05127	4.96759	4.21676	4.80148	4.48185	4.30046	4.94429	4.60682	3.8905	4.44721	4.79263	3.8943	4.58963	5.08038	5.11866	5.17757	4.47347	5.75499	4.51846	5.10605	5.37562	4.93749	4.23447	4.46378	4.41777	4.524	6.22069
BCL10	2.79558	3.27428	4.14854	2.7854	3.36795	4.03607	3.02959	3.2374	3.593	3.66978	2.88245	3.86635	2.88609	2.89141	3.14971	3.4396	1.97752	3.05355	3.83602	3.25383	3.44087	3.88325	3.61295	3.79331	3.55927	3.20721	3.13508	3.88785	4.03505	3.35035	4.14906	4.17967
BCL11A	3.15845	4.33771	3.89698	2.9966	4.80502	5.01055	4.00428	2.04399	5.48662	1.03283	2.59094	3.84861	3.91825	4.49892	0.318513	1.95066	3.93608	3.60339	0.013358	0.0997112	0.164447	3.16568	0.375557	1.52793	0.161001	0.262387	2.40733	0.224747	0.704401	3.66866	2.00432	0.730845
BCL11B	0.017159	4.55191	4.41144	1.10477	0.231752	2.05352	4.07092	1.86881	4.00784	3.94184	3.36976	4.95061	4.23071	2.66233	0.464043	2.2165	1.59341	2.38884	0.735433	5.71083	0.470766	4.32659	1.95107	0.00536827	0.282689	0.62386	2.3599	2.75523	3.05745	2.88427	0.0776375	0.301093
BCL2	2.05681	3.39177	4.15822	4.90395	2.77349	5.61506	1.89783	2.68606	4.40022	4.40236	4.24537	4.30288	4.52736	2.83397	4.29023	4.92436	2.25643	5.27959	4.18946	4.31836	5.19401	3.6499	5.72978	4.70874	4.77546	4.98407	4.0626	4.60688	5.03333	6.59275	4.59779	3.50655
BCL2L1	5.65197	6.67761	6.36339	6.05556	6.48598	6.53337	4.34688	5.29727	7.32171	6.29538	6.08979	6.15555	6.43769	6.02136	6.09776	6.55889	5.57104	6.11039	5.96123	6.85199	5.70683	6.007	6.38151	6.7574	5.57976	5.93622	5.47059	5.81932	5.81356	6.44129	6.01851	6.0612
BCL2L10	1.16857	0.807402	0.243467	0.569654	0.406175	0.418398	0.130255	0.870791	1.0233	0.282755	0.551367	0.748852	0.218297	0.336732	0	0.105937	0.3112	0.0353527	0.611701	0.200039	0.421805	0.333444	0	1.03867	0.277543	0.564257	0.034792	0.445506	0.346035	1.55766	0.0667254	0
BCL2L11	4.44355	4.15182	5.52242	4.62477	4.08238	5.7281	3.51662	4.62982	4.87533	5.03209	5.23845	4.80752	4.14191	4.36289	4.40916	5.56044	3.25179	5.08587	4.13305	4.67359	5.02026	4.72334	4.66694	5.16858	5.12305	4.94305	4.44616	4.82784	5.44054	5.62227	5.26622	4.43476
BCL2L12	1.63082	3.9693	4.22595	2.41566	2.34117	4.45967	3.37475	3.78321	4.39107	4.35367	4.19561	4.80107	3.60948	1.68019	3.72401	3.60148	0.74059	3.97657	5.08286	4.74	4.07552	4.39596	3.21243	4.48131	4.57006	4.11253	3.88686	4.71343	4.33192	5.06119	4.43671	4.21171
BCL2L13	4.21887	4.23321	4.87442	4.63663	4.57806	4.77406	4.39208	4.01437	4.48143	4.19996	3.96337	4.07404	4.41443	5.07395	3.42734	4.41026	3.00916	4.41123	4.05063	4.68554	4.0337	3.73487	3.785	3.7462	3.81507	4.09511	4.12969	3.80678	4.07892	4.61534	4.55171	4.02509
BCL2L14	0.0906069	0.0775049	0.373248	0.198908	0.270411	0.354643	0.0864106	2.02813	0.279532	0.118512	0.294737	0.216734	0.220309	0.122715	0.0814452	0	0	0.130545	0.278926	0.260408	0.222205	0.21883	0.123681	0.219511	0.262714	0.160296	0.114525	0.140856	0.219701	0.341182	0.315577	0.584405
BCL2L15	0.275983	1.35548	0.379854	0.462941	1.17406	0.450372	0.354915	1.65289	0.339904	1.34518	0.0397586	0.618757	0.223925	0.7985	0.784437	0.297482	0.103172	0.281293	0.435249	0.113629	0.349104	1.57738	0.372813	0.440905	0.914782	0.873302	0.307529	0.510049	0.415734	0.857336	0.938823	0.301297
BCL2L2	4.64262	5.05616	6.05902	4.47259	5.20537	5.04401	4.06996	4.70626	4.55542	5.10159	5.13652	5.3675	6.04254	4.94172	4.32419	4.55772	3.14455	3.72914	4.73242	4.36899	4.77083	4.91871	4.74507	4.72131	4.69019	4.65303	4.0937	4.58483	5.05104	4.168	4.92888	4.55141
BCL2L2-PABPN1	2.61633	3.05774	2.62038	2.27274	3.42394	3.20637	2.2229	3.46439	3.10461	3.24816	2.4749	2.92094	3.32196	2.61375	2.92024	4.05697	1.1836	2.04471	3.37723	2.17771	2.71043	3.42802	2.85153	2.05571	3.03449	2.83681	2.67428	2.62779	3.10071	2.54157	2.62737	3.44305
BCL3	1.72496	0.298872	0.883743	3.71214	0.71865	3.36457	4.14495	2.58234	1.17687	0.142734	2.17902	0.141155	2.57138	0.4693	0.398066	1.19487	0.0614439	0.0198608	1.3869	0.248451	0.699601	1.24704	0.905427	0.60668	1.01652	1.65051	1.03162	1.19238	0.0437342	4.65099	0.963978	4.99325
BCL6	1.25569	0.501667	3.07811	2.81462	1.45925	4.01898	2.77512	2.02158	0.0901604	3.43775	2.10556	2.12605	4.02361	0.830157	2.24923	1.64459	0.061987	3.48595	3.80675	3.13	4.82494	5.15489	2.55058	4.10602	4.91229	4.82291	1.98295	4.92088	4.75709	2.97151	4.03034	4.5998
BCL6B	0.898053	0.097452	0.709861	1.56607	0.016835	0.170247	1.13445	1.02845	0.154064	5.01771	0.639592	0.14659	0.808152	1.87233	0.404544	0.203907	2.33171	1.18004	2.26898	2.13442	1.38276	0.748779	0.0550166	2.03995	1.03203	1.40756	0.373285	0.0297199	0.147323	0.245796	0.604508	1.47612
BCL7A	4.31012	4.91549	4.50092	4.40723	5.09108	4.60399	4.95109	3.27929	5.17977	4.62025	3.80413	4.98343	4.21545	6.25638	3.11518	5.02423	4.51359	5.44331	3.89287	4.66048	3.87669	4.79949	3.6252	4.11865	3.50764	3.10084	3.67523	3.77652	3.78051	4.60338	3.67771	3.42708
BCL7B	5.62019	5.50308	4.99114	5.89133	6.52797	5.70655	4.92627	5.68273	5.85156	5.11475	4.72742	4.65277	5.29968	4.82951	5.79733	6.30487	4.2903	5.15781	5.84619	5.56365	5.74827	5.68038	5.67696	5.72671	5.54798	5.53303	5.40458	5.33346	5.88226	5.09896	5.71975	6.20427
BCL7C	3.86907	4.33792	4.24078	4.90485	4.24731	4.80429	4.49119	4.4333	3.8461	5.16807	3.66657	4.3197	4.12488	3.02957	5.07358	4.77264	2.80375	4.77137	5.22093	4.48918	5.25248	4.86377	4.95624	5.57195	5.42199	5.3473	5.59164	4.66332	4.76103	5.29165	4.68026	5.61943
BCL9	3.04575	2.64514	3.6239	3.98006	4.07894	3.45973	4.39167	3.14757	2.99007	3.45912	2.7311	3.44341	3.32733	3.65427	3.47829	3.39169	0.242709	3.33029	4.74498	3.29572	4.97316	3.63329	3.71837	3.35727	5.24358	4.22544	2.72191	3.74873	4.10437	3.71652	4.86891	5.00905
BCL9L	1.36428	1.53012	2.05984	2.15274	2.70893	4.38673	3.03867	3.21617	2.06391	2.36758	1.43258	1.34376	1.93883	2.36069	0.797366	2.53112	1.15811	2.55243	2.66942	2.60517	3.02673	2.88103	3.86899	3.70247	3.044	2.66459	2.25794	2.84807	2.81164	5.11916	1.12495	3.64583
BCLAF1	5.80254	5.94248	6.33765	5.96999	6.13916	6.32023	6.01406	5.72491	6.45455	6.30972	5.81096	6.34199	5.99278	6.62396	5.74504	6.51075	5.05378	6.31795	6.47997	6.0785	6.39359	5.28734	5.87899	6.29541	6.43582	6.29015	4.84308	6.02656	6.24171	5.99638	6.46394	5.73492
BCO1	0	0.0363401	0.0728302	0	0.0185331	0.0202401	0.365096	0.977579	0.295011	0.0896539	0.129147	0.0990423	1.03356	0.0737441	0.193175	0.483048	0.546739	0.494599	0.182931	0.0368506	0.94615	0.283066	0.212333	0.593723	0.586652	0.686785	0	1.48843	1.25383	0.00955168	0.257585	0.118406
BCO2	0.730306	0.474875	0.76745	1.0552	1.01398	0.766092	0.488038	0.998111	0.468197	0.755673	0.418119	1.01536	1.46642	0.599805	0.557549	1.66328	0.409961	0.124441	0.585031	0.618303	0.997418	0.693761	1.54257	0.268305	0.98147	1.21789	0.653688	1.1589	1.17629	0.958757	0.822693	0.831265
BCOR	5.08877	4.77212	5.29054	4.28068	5.16322	4.94268	5.28707	4.6028	4.65396	5.04264	4.65427	5.38678	4.64557	4.95989	4.79799	5.771	3.19319	5.28523	6.64074	4.39364	6.59579	4.8786	5.52062	5.40225	6.87964	5.51056	4.34298	5.27658	5.32289	4.35741	5.53018	5.32684
BCORL1	1.86535	2.63331	3.27469	2.74125	3.05449	3.4951	2.64118	2.7907	2.49219	3.04573	2.25252	3.12608	1.8444	2.53172	2.17567	3.40935	1.03668	2.59635	3.32925	2.34272	3.53201	2.29772	3.23124	2.12744	3.71862	2.87106	1.56624	3.10943	3.62579	2.05701	2.42663	2.89375
BCR	4.69614	5.10146	5.43804	4.55093	5.31502	5.78503	4.22292	3.96661	5.14091	4.26124	5.10255	5.25466	5.38109	5.58229	3.93635	4.11039	4.0244	3.29598	4.70614	5.18898	4.99454	4.47508	4.52573	4.61805	5.08509	5.04178	4.58839	3.6025	4.25203	5.4524	4.53024	5.45043
BCS1L	4.5162	4.84669	4.45497	3.79985	4.70651	4.89159	5.47297	4.31912	5.20967	3.96356	4.5058	4.38639	4.2498	5.69274	4.28678	4.76039	4.257	4.39823	3.48955	4.45335	4.229	4.17719	4.08793	4.18891	4.0172	4.23542	2.88273	3.28451	3.97903	5.38596	4.57029	4.15746
BDH1	4.93835	4.03298	5.33743	4.71849	5.01544	3.8413	1.09096	4.97702	4.79349	4.5376	4.27979	4.57416	4.20962	4.12389	3.27505	4.86625	2.50367	3.20589	3.93043	3.72508	3.41471	4.56424	2.89619	3.65069	2.99096	3.55947	3.73535	3.2837	3.71864	3.20383	4.82934	4.28209
BDH2	3.86214	2.71518	3.6627	4.30855	4.16228	3.46686	2.82929	3.87273	2.85406	3.78673	2.94759	3.27913	3.88981	1.9619	3.95346	4.18473	0.985515	3.26287	2.48622	5.20646	3.19846	4.49678	2.81869	3.43336	3.61202	3.93286	2.36609	4.49754	4.50458	5.5599	4.02124	2.80287
BDKRB1	1.88198	0.82921	4.26948	0.450037	0.0619906	3.76978	0.048741	0.842232	0.671248	0.195643	3.59003	0.437428	0.313	0.403014	0.781385	2.02001	1.65016	0.964599	0.318836	0.0934485	0.0993095	0.389805	0.37389	0.280596	0.113169	0.0650892	1.45605	0.495604	0.301646	0.153234	2.1049	2.78089
BDKRB2	0.0360545	1.30115	0.246699	1.78888	0.352322	2.26211	0.18784	1.11986	2.25765	1.3645	0.358517	0.453249	0.482305	0.409003	1.96794	0.842231	0.329961	2.57452	3.34944	0.399354	2.89984	0.378111	1.418	0.773038	2.621	2.17728	0.82693	2.5147	2.11957	0.166215	2.13984	2.16272
BDNF	0.0409572	1.65913	3.49103	2.71524	0.912269	1.95405	0.694517	0.233669	4.9815	0.11616	3.00657	3.42684	0.930112	1.13734	0.0221585	0.466727	3.13135	0.176627	0.0348756	0.0329111	0.900623	0.0860956	1.05297	0.0596707	1.51819	0.469902	0.700449	0.564682	0.0514853	0.102789	0.228591	0.464504
BDP1	3.18309	3.36854	3.50249	5.51406	4.39604	4.00842	3.13224	3.40724	2.82657	3.89024	3.10548	3.27166	3.78126	3.7811	3.42408	3.96724	2.37093	3.61556	4.72115	3.60717	4.93311	3.41257	5.16133	3.02665	4.91827	4.15249	2.37548	3.59147	3.94617	2.92046	4.10103	3.40143
BEAN1	0.57687	1.05118	0.871797	1.99111	0.393212	1.02319	0.451041	0.638855	0.373647	0.491998	0.362803	0.384797	0.844048	0.475418	0.726612	0.741326	0.176859	1.6736	1.22544	0.23273	0.717189	0.558419	2.69293	0.375449	1.10238	0.678349	0.699195	0.592713	1.15187	0.333056	0.721598	1.73355
BECN1	5.13355	5.08377	6.37976	5.65986	5.99361	5.61464	5.03103	5.68003	5.29167	5.6297	4.94142	5.85314	4.90256	5.83353	5.26046	5.61178	4.22387	5.09081	5.48279	5.72652	5.3983	5.18803	5.54685	4.89478	5.34263	5.61118	4.28023	5.44164	5.64557	4.53383	6.18641	5.93686
BEGAIN	3.23897	3.83193	4.38258	2.19941	1.48123	5.54187	5.10111	2.18236	3.22545	3.15676	2.69105	5.2915	2.09016	1.51925	1.83774	3.248	1.83058	4.3774	4.67191	3.7281	6.28693	5.70974	6.88426	3.27981	6.29291	5.94971	0.531088	2.34528	2.07612	0.209561	2.46755	1.46514
BEND3	2.69327	2.38127	2.30196	2.37012	2.54727	3.12204	2.80304	2.65158	2.30966	2.53907	2.07025	2.61557	2.26511	2.84688	2.55356	3.26023	1.5424	2.91842	3.53456	2.68891	3.38171	2.64585	3.12444	2.75958	3.29619	3.07073	2.45667	3.27848	3.29194	2.53312	2.76787	2.76357
BEND4	0.761925	1.14131	0.785367	4.37912	0.808894	0.251159	1.34174	0.0181339	0.0197202	0.163117	1.72774	0.230511	1.17997	1.78582	0.0141932	0.0140727	1.04525	0.0326194	0.0238591	0.691259	0	0.0574666	1.99551	0.00901498	0.0404766	0.0604052	0.927745	0.0297287	0.0640587	0.0338125	0.0220143	0.0702114
BEND5	1.80197	4.04018	4.10429	2.61749	3.95369	3.61655	2.58166	2.31375	3.87092	3.82903	2.01128	3.96926	3.85445	3.23624	3.24544	4.41941	2.71237	3.52615	3.16406	4.21369	3.6143	4.64073	3.21665	3.73961	3.52069	3.668	2.74412	4.29389	3.96946	2.5488	3.08881	2.21954
BEND6	0.909339	1.62489	0.911522	1.34347	0.845771	0.334561	2.91326	0.457316	0.734268	0.44556	1.22338	0.952093	0.818024	1.22887	0.138362	0.18835	0.554219	0.153722	0.828071	0.35512	0.710857	1.86584	0.850763	3.57298	1.11831	0.571412	0.177021	1.55945	0.77336	0.257516	0.492074	0.163336
BEND7	0.106088	2.70377	3.44822	0.0978613	1.91521	2.71503	3.0947	3.08023	5.59236	3.30636	2.70178	3.51746	0.0915111	3.07451	1.3011	3.06167	2.07636	2.021	4.96663	3.78772	5.61549	3.81214	4.89594	4.73226	5.52609	4.56539	0.245657	4.85357	4.92707	3.23436	0.0925246	3.31858
BEST1	1.02268	1.73055	1.48227	2.56288	1.42067	2.37107	1.92756	1.79609	2.42134	1.8658	1.58638	1.80204	2.88078	1.98313	1.60494	2.13834	1.27865	1.15857	1.77274	2.09458	1.72071	1.37775	2.81028	0.91858	1.83786	2.00417	0.781923	1.76473	1.97923	1.33584	2.14448	2.29523
BEST3	5.71144	5.14569	5.84713	5.77132	6.24336	6.42135	0.66763	1.52484	4.73007	5.54437	5.90713	5.85551	5.77436	1.65428	4.87862	3.23948	1.15001	5.00444	5.12041	6.50504	4.29723	4.45553	5.66543	4.88001	4.46685	2.89646	4.20627	3.86632	4.20257	2.19675	5.74857	3.68621
BEST4	1.75529	0.444838	0.534011	0.568284	0.536075	0.728786	0.0370065	1.39028	0.257171	0.123827	0.756215	0.513272	1.2461	0.119532	0.428871	1.72814	0.454115	1.0998	0.516867	0.0332783	0.579824	1.04031	0.88713	1.70366	1.45157	0.262991	0.822401	1.40698	1.58282	0.0736617	0.967256	1.13568
BET1	5.25517	3.99632	3.94697	5.0669	5.06556	4.83698	4.04387	4.33561	4.79725	3.3399	4.38257	3.84136	4.42174	3.69798	4.2781	4.39981	2.70863	4.27134	4.35993	4.169	4.23376	3.93274	3.71871	5.03082	4.13665	3.93081	3.93185	4.24898	4.85423	4.57353	4.58404	5.56534
BET1L	4.8299	3.82702	4.85625	4.83609	4.82817	5.27754	4.73251	4.44529	5.00508	4.06635	4.53114	4.41026	4.20631	4.79836	3.82189	4.7488	3.09528	4.26973	4.60512	4.46817	4.73102	4.29227	4.81574	4.14251	4.71029	4.50972	3.56934	4.85959	5.13927	4.74568	4.21309	5.14425
BEX1	7.7405	8.48942	8.76769	8.1556	8.15658	6.70653	6.3391	5.54631	7.17746	9.05077	7.85244	8.95175	8.00185	7.66099	7.34862	8.15167	6.82445	7.40327	8.10558	7.85107	8.32261	7.80879	8.08475	1.34313	8.47047	8.7503	8.0471	9.53972	9.31335	0.45474	7.38594	6.04264
BEX2	3.96318	7.68079	7.62388	6.81948	5.99366	6.13295	1.94262	5.00786	6.79063	6.73796	6.81822	7.77377	6.18302	4.95598	6.24823	6.07555	5.85242	4.04848	5.85675	6.74087	6.35697	5.86664	7.79375	6.94795	6.93479	5.77482	7.3839	5.72767	6.28614	3.9234	5.74633	4.58725
BEX3	2.57624	8.78962	8.85127	7.87837	7.37188	7.70416	7.66518	6.94314	9.31084	8.70748	7.78337	9.15509	7.71769	8.2507	6.82159	7.97112	7.29908	7.23615	8.29329	8.17947	8.28854	7.8766	8.25846	8.40495	8.70942	7.88966	8.09667	8.76692	8.80987	6.168	6.64591	5.10263
BEX4	3.33756	6.83264	7.05383	6.38744	5.95771	5.6029	4.66513	5.291	5.68363	6.45779	6.225	7.03544	5.84223	5.84361	0.0274502	6.04285	4.80963	5.00232	6.14717	6.16657	6.50164	5.58536	6.97643	6.38945	6.85654	6.23106	6.39635	6.58961	6.50288	3.10147	0	3.19155
BEX5	0.964655	4.09414	5.17389	2.92473	4.09707	1.43337	0.0355337	2.25878	1.1974	4.67062	3.77213	5.00551	4.04305	2.60838	0	2.43249	1.94758	0	0	2.48149	0.135818	3.00712	0	0.161912	1.35252	3.68206	3.44708	0.428908	0.47848	1.16049	0	2.23681
BFAR	4.95978	4.65323	4.78228	5.15347	4.15935	5.43415	5.07647	4.72397	4.17408	4.33788	4.81269	4.94686	4.58293	4.98771	4.91382	5.33753	3.72111	4.73858	4.94337	4.82461	5.12788	4.38179	5.72722	4.72531	5.26248	5.33922	4.59131	4.47017	4.87683	4.21648	4.84843	5.17627
BFSP1	0.876989	1.30042	1.1189	0.715182	0.689998	3.54765	0.737579	0.90447	1.19414	1.65915	0.789368	1.26444	0.988735	0.396909	2.80587	1.87143	0.479902	1.83563	2.74851	0.707446	2.86872	2.12285	1.74054	1.19519	2.86822	2.89029	0.833368	2.76923	2.24705	1.49158	2.24337	0.758189
BGLAP	0.620139	2.10258	1.34841	0.967684	1.06558	1.81597	1.25136	1.77705	1.58921	2.28714	0.966549	1.85163	2.01508	1.25691	1.30377	2.11484	1.14828	2.44015	2.69822	0.893837	2.42488	3.36178	1.48815	0.602459	2.66355	2.29733	0.916554	1.20674	1.79753	1.26313	2.54788	1.24079
BGN	1.15573	1.22921	1.8371	0.297221	1.43041	2.9286	5.68422	1.32185	1.05306	1.70332	0.566438	0.481474	0.151393	0.343527	0.185996	1.39695	0.199091	3.83104	2.07936	1.05908	5.6486	2.66149	2.62117	3.82053	6.13312	5.30483	0.104462	2.5763	2.7262	0.13222	0.982681	0.471565
BHLHA15	3.5712	1.74758	1.41051	2.7564	2.77128	3.18161	2.64217	2.45844	2.93737	3.16353	1.63843	1.16964	2.07111	0.932724	2.18778	4.54945	0.876008	4.12251	2.80707	3.5359	2.55645	2.43327	3.0129	2.70023	2.81899	2.63651	1.01332	2.13398	2.69563	1.61661	2.61673	2.96295
BHLHB9	2.36931	2.82694	3.87787	2.25257	2.98975	2.09474	1.45997	2.20363	2.38624	2.89536	3.1899	4.38915	3.06051	3.86866	1.69378	2.62608	1.72946	1.93154	2.84838	2.88542	3.33678	2.48003	0.680855	2.83988	3.16499	3.03319	1.55441	2.91586	2.85592	1.14681	2.56433	1.68962
BHLHE22	4.83952	4.66721	3.30535	3.52046	2.4703	0.0931795	5.62724	0.0234811	3.78704	0.448844	4.96442	1.80321	2.35579	6.07882	0.544701	0.0499406	1.98064	4.83798	0	1.30987	0.0740356	2.89781	0.564466	0	0.167786	0.139255	0.2209	0	0.0309977	0.0128662	0.742979	0.0926508
BHLHE23	0	2.55001	0.516946	0.224305	2.04956	0	0.0456624	0.0911122	0	1.54905	0.334001	1.89548	2.54227	0.901533	0.747834	0.204385	0	2.34064	0.429275	3.95445	0.401186	2.45544	0.0606927	1.77618	0.789953	0.167859	2.10906	0	0	0.101636	0.0951914	0
BHLHE40	1.00765	4.18415	2.25034	5.7138	3.76493	5.59115	6.78116	3.33109	2.56392	0.847345	2.15276	1.96224	1.89614	1.76306	5.2886	0.383102	1.02487	0.825545	3.18915	0.874817	2.19196	3.47645	3.84124	0.143974	4.03267	4.57294	2.39801	2.79661	0.715826	5.41224	5.0966	5.03527
BHLHE41	0.417982	0.429759	0.0334535	0.709982	0	0.460794	1.35483	0.978684	0.290897	0.314346	0.457963	0.0313369	0	2.75056	0	0	0.482377	2.18647	0.156311	0.0620496	1.9462	0.089282	0.711207	2.64782	1.3259	2.9498	0.00756771	0.183907	0.443044	5.37329	0.0227856	1.27908
BHMT2	0.37089	0.286135	0.436564	1.12969	1.23031	2.05648	0.142249	1.65046	0.567586	0.965434	0.947447	0.464528	0.377096	0.540344	0.464979	3.22502	0.588952	2.35053	3.49954	0.422195	4.07921	1.58205	0.582198	3.31353	3.79778	3.58701	0.446887	1.59612	2.9678	0.635917	2.31734	0.66155
BICC1	0.455201	1.7706	0.370959	1.66405	2.78331	1.70321	1.59012	0.17043	1.35259	1.05172	0.993318	0.196274	0.666992	1.32148	1.18835	0.421526	0.591437	0.0814602	0.0775206	1.53151	1.61841	1.34942	1.8748	0.0787123	0.857918	2.43301	0.447501	2.01765	1.31774	0.0117346	2.58867	0.272063
BICD1	2.41315	4.17927	3.10751	1.72249	3.48813	3.06212	4.83189	2.32792	4.49077	3.32018	2.46957	3.02596	2.74831	6.3464	2.76309	2.31634	2.5475	3.88194	2.87697	3.55641	2.67873	3.39245	2.25275	3.16785	2.87853	2.94522	2.05003	2.45385	2.49379	3.50463	3.39055	0.685256
BICD2	3.11082	3.72573	4.60635	3.41207	4.24128	4.41238	3.90146	3.59346	4.11809	4.4621	4.16072	3.79591	4.4435	5.11813	3.68505	4.41798	3.41063	4.30386	4.37242	4.78247	4.09528	3.5714	3.89235	3.96809	3.8546	4.03685	2.89102	2.91213	3.20102	4.25968	5.06158	4.11617
BICDL1	4.42864	4.54492	5.23703	5.17219	4.65561	5.10069	3.66858	5.31296	5.38203	4.59923	4.61195	4.88532	5.10328	4.61803	4.24439	6.04534	4.05703	4.93221	5.62111	5.5453	5.14161	5.31274	5.10262	5.21167	5.08888	4.96953	3.82388	4.36736	4.40283	5.70044	5.14302	5.60314
BICDL2	1.71535	1.59326	3.21205	3.57185	1.29854	4.68945	0.191775	2.52066	2.96265	0.842693	4.09638	1.28461	0.951313	0.116045	0.436327	1.55699	0.216754	0.615532	2.48042	2.58133	0.34435	0.432266	1.84291	0.833707	0.422254	0.369728	2.32888	0.272045	0.914402	1.73284	0.38435	3.8757
BID	4.29728	4.47582	4.71333	3.64701	4.74202	4.94579	5.27107	4.18254	5.21519	2.6424	4.29859	3.98494	3.71127	4.76999	3.70936	4.02367	4.13147	2.48464	2.93826	4.32061	2.46974	2.86757	3.22855	3.44376	2.67883	2.35288	4.59124	2.49385	2.34912	6.21289	3.4289	3.94889
BIK	6.31929	2.56751	3.91604	6.27654	5.1378	3.69848	0.484856	3.56308	4.11407	4.861	4.71624	2.12539	5.61594	0.746205	3.98737	4.33328	1.05055	4.17902	3.83376	3.5438	3.96623	3.03793	4.12194	4.48136	2.56943	2.5322	3.86687	2.36416	2.71141	4.50253	5.0765	3.34591
BIN1	0.928682	2.00681	3.29344	2.03017	2.97433	4.15705	4.18434	4.88102	1.19602	0.307602	2.9237	2.2299	0.464523	5.03324	1.65653	4.18944	2.37548	4.52449	2.74349	0.729181	4.5342	0.0944856	3.43387	0.205924	4.20572	4.09119	1.31759	2.97251	4.17586	0.683207	1.80913	2.47311
BIN3	3.36457	2.89945	4.99687	3.66714	4.44274	4.79939	3.75314	4.58247	4.28924	4.3808	4.60033	4.6613	3.99968	4.1985	3.49387	4.9591	2.89977	4.68904	3.80689	3.85899	4.12856	3.7804	5.75602	3.6286	4.02633	4.41332	2.33123	4.25857	5.02065	3.43452	2.97983	3.04494
BIRC2	4.38137	3.39252	4.22406	4.87505	5.01179	5.00043	4.34415	3.84721	4.70816	3.90185	4.10936	3.86819	3.71109	4.57858	4.67018	4.56481	3.71944	3.59754	5.32287	4.58511	5.17296	3.77463	4.52668	4.7506	4.94286	5.00745	3.96968	5.15023	5.115	4.71698	5.27491	4.97937
BIRC3	1.71913	0.0176076	0.484574	1.79953	1.23827	1.8664	3.97692	0.905077	0.60024	0.189279	0.855982	0.364938	0.771509	0.32622	0.604456	0.117589	0.0596878	0.0282573	1.16452	0.687665	1.6638	0.0800463	0.996664	0.262738	1.56249	1.64923	1.13227	1.21536	0.939847	2.17561	0.788135	1.94211
BIRC5	5.72413	6.23307	6.79873	6.17307	7.33692	6.0978	6.5411	5.60434	6.62932	6.46754	5.57645	6.80312	6.67225	7.41717	6.86129	5.93473	5.67757	6.30992	6.07483	6.45358	5.89569	6.28275	4.75539	5.61791	6.00596	6.2727	6.57622	6.26004	6.19708	6.26772	6.64503	6.20261
BIRC6	2.96001	3.73268	4.23887	3.51739	4.06723	4.32864	3.96749	3.45547	4.9406	3.71694	3.73311	3.22536	3.63413	4.92416	3.1474	3.98223	2.85422	3.65161	3.42594	3.61886	4.33265	3.11285	3.96322	4.2947	4.2721	3.78811	2.64293	3.45879	4.10419	4.21038	4.11323	3.59468
BIVM	4.77461	3.67122	3.57078	3.99809	2.33547	0.40104	4.07622	2.51248	2.76647	2.83352	3.35885	3.42138	4.47597	4.55628	4.14048	3.23177	3.84337	2.65772	2.51926	3.01834	2.22715	2.91842	0.962873	2.85447	2.08115	2.91561	1.99823	2.2969	2.47205	3.92969	5.46061	1.44804
BIVM-ERCC5	2.49555	2.04585	2.4823	2.46471	1.4713	0.526432	2.66119	2.44925	2.41902	1.98054	2.10435	2.6494	3.57312	3.12438	2.84331	1.76225	1.55931	1.76185	1.7717	2.09847	1.89228	2.29982	1.25217	1.94276	1.46262	2.00906	1.40507	1.67823	2.15174	3.26828	4.07569	1.14635
BLCAP	6.35361	6.89662	7.70906	5.96257	6.53837	6.4909	6.34702	6.78099	7.2678	6.04907	7.55836	7.37148	5.69004	5.65398	4.79922	7.07079	5.71314	5.98263	5.55577	5.55728	5.28269	7.17547	6.13556	7.07884	5.52285	5.17022	5.98694	7.10566	7.00508	5.96692	6.04107	6.01996
BLK	4.94214	0.0214421	0.143411	0	0.998098	1.81478	0.0304735	0.0352179	0.0302845	0.106385	1.13318	0.0342135	1.01083	0.484484	0	0.0414506	0	0.568915	2.56051	0.0885413	3.96575	0.022259	0.383063	4.60775	3.33381	3.68947	0.509665	0.156359	1.32113	0	0.0176393	1.26465
BLM	3.06446	3.50723	3.10122	2.71104	3.59456	3.18268	2.97073	2.55804	3.3279	3.32083	2.57116	3.46396	3.56693	5.13275	3.33574	2.91695	2.90475	3.70497	3.83234	3.592	3.41858	3.65018	2.49955	2.80429	3.40135	3.33537	1.6859	3.15566	3.37869	3.96669	3.36581	2.81834
BLMH	6.10266	5.56548	6.07135	5.20771	6.23207	4.48189	5.65931	4.82719	5.86014	6.1216	5.36346	5.6062	5.72177	7.16997	6.21202	5.63155	5.55132	4.98206	5.40798	6.09388	5.69467	5.51717	4.30599	5.05119	5.60212	5.53755	4.20773	5.24766	5.74886	4.71949	6.60791	4.03378
BLNK	2.07794	0.212281	0.152033	0.27764	0.0175252	1.39526	0.494136	1.44154	0.721724	2.64406	0.759563	0.139286	0.162173	0	0.0128336	0.30269	0	2.75755	1.1313	0.230447	1.4114	3.73922	0.133251	4.38496	1.29183	1.8914	1.64433	2.75915	2.59072	3.20115	0.0368732	0.99816
BLOC1S1	6.00418	6.39063	6.86418	6.98293	7.29006	6.3018	5.94487	6.26837	7.0748	6.98734	6.21475	6.66741	6.79109	6.3977	7.07214	6.40052	5.18392	6.3152	6.43233	6.7707	6.56147	6.3385	6.30559	6.86227	6.42711	6.3582	6.15192	6.07482	5.79066	6.53327	7.34271	7.39153
BLOC1S2	4.81164	5.2124	5.24004	5.0936	5.18164	5.40476	4.31462	5.71649	4.70674	5.50658	4.91278	5.0039	5.75253	4.37231	5.93231	5.86615	3.76739	5.4995	5.45048	5.10656	5.29739	5.06479	4.89131	4.72342	5.16877	5.13696	4.2891	4.32367	4.83643	5.61049	5.86874	5.14072
BLOC1S3	3.40479	3.36715	4.01735	3.70776	3.52098	3.54546	3.05537	2.71324	3.95185	3.90387	3.71163	3.9971	3.28724	3.62473	2.59262	3.20234	1.81159	3.06791	3.0403	3.21281	3.32458	2.97384	2.71816	3.5542	3.31643	3.72481	2.34837	3.32645	3.71723	4.1262	3.50738	5.11296
BLOC1S4	3.75886	3.66078	3.21981	4.02237	3.7531	3.14241	3.43255	3.42961	3.37534	3.31943	3.12823	3.33129	3.65016	2.89322	3.21514	4.15419	2.92623	1.97458	3.09624	3.97068	3.77697	3.30121	3.05601	2.41453	3.88714	4.16253	2.90484	3.18635	2.79303	3.9117	4.02856	3.59783
BLOC1S5	3.12351	3.54504	4.13488	4.20885	3.45787	4.38192	3.60861	3.46756	4.03887	3.83836	3.79701	3.98933	4.59303	4.13061	4.44456	4.33809	3.25932	4.00094	3.5069	5.47598	4.02378	3.47443	3.87164	4.30261	3.92198	3.73341	3.47948	3.76997	3.8598	3.7484	4.96228	4.37559
BLOC1S5-TXNDC5	1.21494	1.45654	0.887536	1.06663	0.944869	1.06919	0.788409	1.26577	1.44066	0.877271	1.21956	0.979791	0.812311	1.25649	1.11034	1.71652	0.83077	0.905186	1.03204	2.01937	1.17805	0.858911	1.2118	0.80096	1.10868	0.911938	0.84911	1.11414	1.24764	0.724166	1.2244	0.783936
BLOC1S6	5.66062	5.7051	6.573	6.42906	6.12246	5.6236	5.84131	5.95239	6.08065	5.80839	6.65343	6.61979	6.36328	7.00363	5.41	6.27864	4.62228	5.83152	6.05144	5.75474	6.46976	6.10227	6.08333	5.72146	6.57405	6.1351	4.45758	5.75586	6.00697	6.56207	6.87049	5.82458
BLVRA	4.60004	4.89323	4.76449	3.81329	5.02511	4.08701	4.85662	3.87505	5.62768	5.05944	4.39073	4.72298	5.0303	4.84679	5.79294	4.88741	2.97336	3.96176	4.76713	4.59716	5.25184	3.7157	4.09734	0.817923	5.24309	4.64245	2.27294	1.10381	0.528544	4.51603	5.19338	5.11459
BLVRB	1.42114	3.00916	1.96632	2.42711	0.950413	4.87377	3.36197	3.96311	4.44669	3.61907	0.550509	2.0178	0.309113	2.28217	1.55479	0.922831	0.219782	0.314033	3.76435	1.22413	4.88723	3.29662	4.24117	5.22784	4.88338	4.62827	1.95216	1.63542	0.598045	5.34089	0.165689	7.79695
BLZF1	3.37506	3.55125	3.78144	3.94301	3.86911	3.70665	4.57789	3.60423	4.46387	3.59901	2.96251	3.64986	3.22352	4.14896	3.09807	3.74369	3.08964	3.43198	4.31688	3.22633	4.33691	4.11193	3.53577	3.80732	4.21853	3.80861	2.32514	3.85648	3.90665	3.81491	4.17885	4.24205
BMF	3.10499	4.29989	4.29935	3.84511	3.52392	6.57315	2.68509	3.75472	4.28893	5.46749	3.8135	3.72452	4.53484	3.12903	4.96908	4.65683	1.53681	4.84774	5.64042	5.44996	5.6614	5.3441	5.94514	5.56247	5.53588	5.11789	4.21208	5.67257	5.41046	6.20216	4.89102	6.06146
BMI1	4.91625	4.77157	5.42419	4.6665	4.9085	4.66444	5.37735	4.84012	6.08149	4.78014	5.15315	5.17808	5.06829	4.85254	4.73731	6.19407	3.94592	4.82972	5.77082	5.91958	5.54003	5.13298	4.23547	5.21504	5.31628	4.61446	3.60679	5.58727	5.39628	5.06888	5.82318	4.27596
BMP1	0.792399	2.86698	3.0589	1.21922	2.28876	2.50047	3.94713	3.31121	3.33065	2.98065	2.80305	3.64615	1.95758	5.15452	1.08135	2.81638	2.0038	3.6914	2.50075	2.95584	2.37725	3.4168	3.4452	3.28562	2.61946	2.57235	1.44905	3.04061	2.22079	1.95562	0.693216	1.74825
BMP2	1.22134	2.26692	0.893981	4.02945	2.16402	3.86952	0	1.80497	3.70257	3.39865	2.79249	1.12953	1.6589	2.79767	3.69509	0.521486	2.98922	3.73331	2.75688	1.69159	1.84397	3.29471	2.94429	3.55095	2.66669	0.879979	2.70072	1.25532	0.858645	2.29575	4.62752	1.7792
BMP2K	2.89947	3.51028	3.03764	3.45509	3.17964	3.02411	3.0958	2.26124	2.84342	3.31168	2.53123	2.94553	3.02875	2.66681	3.30751	3.37587	2.24742	2.4481	3.28137	3.39573	3.71308	3.18755	3.00992	3.20677	3.87616	3.54713	1.80946	3.48943	3.53382	3.7924	3.95192	2.40729
BMP3	0.370651	0.260049	1.53656	2.20447	0.296194	1.51696	0.112488	0.259177	0.864221	0.117975	1.1722	1.08594	0.11578	0.363162	0.0936866	0.763178	0.333524	0.445727	0.516168	0.308984	0.13602	0.248102	1.13484	0.105256	0.64283	0.186967	0.177397	0.618578	0.403265	0.329698	0.891449	4.3874
BMP4	0	0	0.435434	0.105278	1.33188	0.118542	0.615741	2.86238	0	1.23742	0.156612	0.134054	0.176451	1.52201	0.513572	0.621859	0.15627	0.515621	0.181014	0.146497	1.47579	1.48648	0.693544	0	1.51606	2.22738	0.00300546	0.560405	0.919722	0.0491282	1.10807	0.0597501
BMP5	0	0.144532	0.283216	0.952592	0.157996	0.234434	0.00920529	0.941628	3.15865	1.3712	0.0147216	0.0315706	0	0.0424128	0.306498	0.614444	0.266572	3.78914	0.749079	0	0.18371	0.225934	0.358576	0.0195684	2.0448	1.23889	0	1.09549	0.432276	2.37001	0.871589	1.17837
BMP6	0.0938023	2.13317	0.823797	0.878484	1.72387	0.175215	2.17509	0.627628	2.16815	1.53105	0.272719	0.0214979	0.495327	0.363952	3.73498	1.50784	0.876324	0.906408	0.916813	0.838078	1.98118	1.02679	2.19261	0.0831299	2.25521	3.42987	0.315433	1.47033	1.32351	0.404322	2.60854	2.21978
BMP7	7.25585	5.36754	0.480946	0.67447	6.46297	2.64975	3.87651	2.30895	1.98717	2.71458	0.0631155	3.46514	4.80117	1.07735	4.35856	3.55273	1.34841	3.772	5.17089	1.00596	5.67811	5.73785	5.93028	0.0894173	4.92711	2.15234	0.0371083	0.29243	0.168509	5.98967	1.9167	0.100163
BMP8A	1.79812	0.716291	2.55677	1.16619	2.82774	2.10505	1.07362	1.05667	2.25005	1.64588	5.25797	1.5798	1.77322	0.220558	1.14139	1.4854	0.721717	2.56095	2.7367	1.66425	2.59678	1.68288	1.805	2.77483	2.3715	2.08852	1.58198	2.03531	2.62051	0.481076	1.28911	4.79192
BMP8B	3.16669	2.4024	4.00698	1.30321	3.4439	3.68323	1.48674	2.75814	2.40529	2.77604	6.65563	2.95042	1.6611	2.12165	3.67936	3.97798	1.87567	3.97458	3.20768	1.4508	3.65446	2.99713	3.7097	3.66213	3.30663	3.12137	3.06686	3.88997	3.86248	0.602632	3.52017	4.44064
BMPER	0.106756	0.717975	1.31553	0.425001	0.264044	0.31108	0.119052	0.514964	0.101335	3.03604	1.31989	0.603252	0.130311	0.0184318	0.0153198	1.86364	0.154008	2.56725	0.149786	0.155786	0.20918	3.42612	0.223298	2.23173	0.613916	0.360174	0.151907	0.335947	0.540459	0	0.00681888	0.0254857
BMPR1A	2.21817	2.96171	2.82913	3.13663	2.81201	2.72807	0.358102	2.45978	2.215	2.53464	2.48773	2.82815	3.01282	2.35216	2.91002	3.32928	1.12851	2.73837	3.57015	3.5322	3.45011	2.84801	1.96398	2.6928	3.2422	2.86499	1.74471	2.85401	2.93137	3.75424	3.4627	3.04283
BMPR1B	0	0.253449	0.17008	2.48954	0.362685	1.60617	3.67877	0.59685	0.316423	0.036982	0.0519765	0.0549319	0.0916835	0.189261	0.0188144	0.0266771	0.0522563	0.0674723	0.129906	0.02764	1.66907	0.108025	0.277281	0.0429753	0.649947	0.718555	0.083548	0.042029	0.0544029	0.583925	0.0551977	4.16615
BMPR2	2.84061	3.36882	4.39238	3.54823	4.47932	4.98205	3.58743	4.12924	4.38605	3.68648	3.75963	4.1134	3.72362	4.75087	4.43815	4.07912	2.59966	3.89568	4.02048	3.95181	5.05001	3.17554	4.79557	4.82516	4.83402	4.30816	3.26247	3.75322	4.4979	3.91735	5.01441	3.74689
BMS1	3.927	3.76529	3.76811	3.36475	3.46188	3.87044	4.31441	3.99779	3.68933	3.80512	3.26662	3.49785	3.78006	3.62964	3.96971	4.05075	2.03243	3.71746	4.37422	3.7522	4.13942	3.55587	4.01371	3.27353	4.07253	3.78881	2.03604	3.79545	3.80501	3.71302	4.06785	3.73553
BMT2	2.98987	3.67777	3.28426	3.30847	3.51668	3.61668	3.06648	2.50463	4.021	2.51928	2.33265	2.62805	3.41925	2.63799	3.67677	3.12297	1.72249	3.18124	3.16401	3.63044	3.35934	3.65406	2.95101	3.50033	3.26067	2.78886	2.78961	3.49972	3.56518	2.61437	3.86531	2.99063
BMX	0.0362604	0.125824	0.0855855	0.0639678	0.0113074	0.298946	0	0	1.45664	0.196858	0.0863497	0.0682362	0.03274	0.0569787	0.109045	0	2.31462	0.174577	0	0.0230197	0	0.0804459	0.0350691	0.447803	0.0901494	0	0.0221376	0	0.19492	6.67699	0.239453	0.077487
BNC2	0	1.1084	0.251437	0.049278	0.255353	0.268532	0.0377702	0.325507	0.0726766	2.61734	0.130505	0.658539	0.0780506	0.0586232	2.50373	1.67974	0.0644685	1.54355	1.80314	1.0935	1.75312	2.83733	0.235474	3.54859	1.99575	2.42293	0.0996032	2.83752	1.62024	0.180925	3.54863	0.137669
BNIP1	3.132	3.67969	3.38068	4.4776	4.78911	3.50372	5.06899	3.86359	3.48435	3.47948	3.3861	3.7515	4.37251	5.04086	4.72627	4.0277	3.13639	3.34208	3.03554	3.92981	3.27525	3.19782	2.68368	3.07736	3.41115	3.70946	2.38273	2.54931	2.32543	3.27285	4.22538	3.83722
BNIP2	5.37477	4.75317	4.6427	4.05265	5.20703	4.9477	5.3849	4.43183	4.58622	4.57002	4.34352	4.22642	4.88338	5.16842	4.32288	5.6381	4.02677	4.74196	5.64712	5.10168	5.03228	4.84943	4.58238	4.69898	5.01645	4.97831	3.87164	4.81881	4.7979	5.52121	4.70777	3.96722
BNIP3	5.93084	6.52193	6.68147	6.62503	6.05045	7.37557	5.59904	5.54607	5.4833	4.63753	6.16322	6.29942	5.91792	5.27854	5.90798	5.66017	3.66745	5.44835	5.46366	5.42935	5.89074	5.20025	5.00296	4.11018	6.00436	5.60662	3.85754	5.05856	4.6719	4.99443	6.87734	6.20654
BNIP3L	4.72692	5.0281	7.85532	5.15465	6.96097	7.28896	6.01091	6.34839	6.66341	6.65562	6.44298	6.85395	4.93133	6.52471	5.95195	6.7354	4.92434	7.31616	5.10278	5.96709	5.11027	6.3577	6.20955	6.93405	5.16506	5.12498	3.72409	5.7848	6.45902	5.04124	5.79425	4.0102
BNIPL	0.586786	1.03955	0.816523	0.839153	1.2637	1.15699	1.07413	2.53448	0.790896	0.979766	0.564469	0.76698	1.23246	1.52363	0.934173	1.07601	0.527358	0.958947	0.854669	0.606525	1.22685	1.75759	1.3716	0.592988	1.11946	1.07201	0.326785	1.15026	1.88213	1.89965	1.61924	0.884449
BOC	0.243508	2.73132	1.32646	0.660309	3.92417	6.06263	1.12705	2.04129	0.751893	3.48008	0.78115	0.869012	3.91434	4.26935	2.68126	3.46856	0.513202	4.67367	4.50615	1.51033	4.7382	5.12786	3.56185	2.61593	5.09797	3.62784	3.64953	4.79925	5.01362	4.61774	3.75373	2.12871
BOD1	4.88703	5.88168	5.56519	5.59651	5.95333	6.10414	6.93985	5.83536	5.26561	5.43138	5.52626	5.42384	6.22647	6.80415	6.40497	6.68535	4.5118	5.93314	5.59519	5.92223	6.0733	5.57764	5.90602	5.30545	6.03646	5.83451	4.25321	5.42149	5.45867	5.43567	6.07734	5.61486
BOD1L1	2.77292	3.45207	3.5479	3.63701	3.24536	3.115	3.6788	3.04607	2.71881	3.19202	3.16929	3.43006	3.73358	3.56216	2.80919	3.58333	2.44545	2.4055	3.23107	3.47282	4.02775	2.90147	2.82362	2.79172	4.09692	4.0312	2.17352	3.12269	3.20881	3.55911	4.21185	3.76577
BOK	0.514586	2.52376	2.67207	1.85604	4.42719	3.55982	1.12999	3.71167	4.2941	0.779922	2.32488	1.40296	0.465789	4.42492	4.992	4.35582	0.690698	4.37464	3.76523	1.39817	5.65996	0.737906	6.18886	4.14402	5.36165	6.06477	1.68545	4.47592	3.72422	0.767293	2.33893	3.97919
BOLA1	4.4282	3.85841	5.17669	5.43527	4.81653	4.72573	5.37197	4.14142	4.65874	3.887	4.31138	4.61284	4.61141	3.70103	5.28277	4.99768	4.29985	3.69443	5.46805	5.09121	5.31385	5.10951	4.95541	4.47983	5.38896	5.25329	4.76384	4.58842	4.79799	4.79879	5.74947	5.52543
BOLA2	5.30786	4.5349	5.04153	5.00226	5.25295	5.14763	5.82583	4.15961	4.1957	4.39606	4.73851	5.38942	4.36567	4.24004	4.90612	4.83971	3.53583	4.20172	4.62587	4.70859	4.28095	3.52184	5.35092	4.19797	4.27003	4.61312	5.02144	3.54454	3.81755	5.29445	4.67619	5.84962
BOLA2B	5.3077	4.53491	5.04143	5.00202	5.25313	5.14775	5.82554	4.15983	4.19573	4.39616	4.73907	5.38953	4.36557	4.23996	4.90608	4.83985	3.53651	4.20181	4.62597	4.70899	4.28066	3.52203	5.35089	4.19807	4.27019	4.61366	5.02142	3.5448	3.81742	5.29425	4.67594	5.84938
BOLL	0.304951	0.779529	0.196635	0.308132	0.517155	0.0690614	0.104996	0.126064	0.504539	0.0357123	0.423657	0.129517	0.280602	3.43849	0.0805249	0.132339	0.00186677	0.144957	0.00191829	0.112809	0.199882	0.0650525	0.257208	0.0896852	0.353252	0.110524	0.0520001	0.0403481	0.186007	0.358785	0.595841	0.124311
BOP1	5.99412	5.71601	6.17091	5.59896	5.63554	5.54102	6.1971	5.15946	5.65937	5.21209	6.25711	6.59242	5.64486	6.63752	5.38416	4.53529	4.62965	4.71602	6.07365	4.73959	6.07689	5.32686	5.40208	5.42947	6.00624	6.07541	4.28779	4.12131	4.92348	6.50729	5.36526	5.16729
BORA	3.98775	3.62487	3.70831	3.32497	3.34318	3.58724	3.67767	3.9385	4.20976	3.51271	3.22124	4.31514	4.93942	5.37953	3.70285	4.43225	2.40123	3.93793	4.08365	3.20938	4.23537	3.14232	3.96327	3.88783	3.97832	3.99352	2.70557	3.72203	4.06259	4.4974	4.69056	3.44662
BORCS5	2.34061	2.84962	3.64979	3.3317	3.76601	3.78629	3.55857	3.21789	4.18089	3.24437	3.15121	3.50631	3.35219	3.36409	3.52407	2.83303	1.80012	3.82461	3.10975	2.01286	2.76105	2.67019	3.1698	4.52782	2.56903	2.87277	3.03126	2.48213	2.7114	3.31042	4.34445	3.40045
BORCS6	1.6603	2.35025	3.20052	2.1333	2.09493	1.74848	1.0792	1.96895	1.71376	2.62562	2.61776	2.53644	2.42973	1.28861	2.32602	1.61751	1.28876	1.47348	1.79823	2.18797	1.71357	2.01041	1.57517	2.14475	1.45342	1.26631	1.25402	1.32074	1.25986	1.34668	2.47189	1.8049
BORCS7	3.42407	3.58714	4.44356	4.48788	4.21475	3.33083	2.53246	4.90571	3.90472	4.7356	3.58207	4.38139	4.30276	3.85987	3.94927	4.8468	2.45547	4.3058	4.69197	4.61821	4.63053	4.00591	3.08514	3.53676	4.34085	4.02593	3.07545	3.46663	3.76827	3.21634	4.32947	4.4451
BORCS8	3.87113	4.32001	4.51781	4.69553	4.53454	4.87186	4.06871	3.76403	4.95891	4.8767	4.34599	4.52303	4.16552	4.29657	4.60546	4.79432	3.20003	3.99873	4.09841	4.23364	4.13679	3.95281	3.95568	4.23176	4.27631	4.23143	4.17521	4.40191	4.12667	4.08676	4.29395	3.75891
BORCS8-MEF2B	1.81641	2.51055	2.46984	1.68387	1.62079	2.7313	1.35025	1.96592	1.45499	2.22539	1.92811	3.4336	3.69306	2.42531	2.42785	2.83062	1.11805	2.83472	2.16206	2.03424	2.38705	1.91412	3.08778	1.34498	1.81516	2.07238	1.08379	2.45572	2.07693	2.75881	2.51233	1.83204
BPGM	4.01548	4.24838	4.03134	4.64856	5.19794	4.54312	4.04871	3.93455	4.38982	4.30884	3.59028	3.87138	4.5664	4.12773	4.397	4.6558	3.03685	3.63991	4.22274	4.70504	3.9764	4.00018	3.23869	3.88017	4.14991	4.14488	4.28797	3.93918	3.9497	4.25066	4.90033	3.62321
BPHL	4.48844	4.0447	5.15036	4.3351	4.17996	5.12738	4.26782	3.85161	5.08862	4.53701	4.43697	4.74462	4.3687	4.51319	3.9143	5.12815	3.48052	4.63608	3.7143	5.78188	2.98699	5.0005	4.61835	5.16084	3.23478	3.37003	4.87614	3.86517	4.59252	4.40689	4.10361	5.27274
BPIFA1	0.044134	0.0481859	0.129233	0	0	0	0.0234367	0	0	0.0257212	0	0.0278879	1.51574	0.0836032	0	0	0	0.222412	0.153146	0	0.165001	0	0	0.0599311	0.0612133	0.143092	0	0.379163	0.46634	0	0	1.18513
BPIFB1	0	0.0823438	0	0.0286474	0	0.0318205	0	0.634586	0.15643	0.0295356	0	0.0580657	1.71814	0.175254	0	2.26803	0	0.0777276	0.178773	0	0.0571559	0.132576	0.0630812	0.452325	0.12893	0	0	0.323196	0.447795	0	0	0.296581
BPNT1	4.54952	3.68109	4.7313	4.74651	4.44541	4.64716	3.91719	4.15424	3.88472	4.09018	3.56505	4.07993	4.34153	4.03271	3.86589	4.87463	3.04882	3.35309	4.56374	4.35277	4.47652	4.2966	3.94325	4.2324	4.31668	4.27132	3.73303	3.96306	4.00859	4.15155	4.81459	3.94828
BPTF	3.61526	3.93042	5.1538	4.47712	5.02608	4.62515	4.01994	3.95132	4.30837	4.4683	3.74079	4.36601	4.46048	5.49457	2.81407	4.29659	3.38277	4.29262	4.47331	4.8933	4.55737	4.48334	4.22759	3.72799	4.48612	4.31377	2.83141	4.31794	4.59676	4.39596	4.23429	4.44725
BRAF	2.9642	3.1035	3.18401	3.41938	3.62607	4.00628	2.77841	2.80624	3.76801	2.77577	2.63574	2.7301	3.13363	2.7688	2.9982	3.37136	1.944	3.38743	3.63861	2.82313	3.48854	3.1274	3.5015	4.01587	3.4381	3.12254	2.44698	3.37058	3.61473	2.8705	3.47434	3.18161
BRAP	3.17278	3.76348	3.69923	3.17167	4.09677	4.03743	3.47883	3.9937	4.07264	4.01319	3.30619	3.79875	3.64057	4.65211	4.09007	4.12836	2.73466	4.48204	3.92612	3.61437	3.91659	3.5061	3.94146	4.35844	3.79114	3.33501	2.5524	3.59189	3.8199	4.12113	4.53366	3.96479
BRAT1	5.50976	5.83192	4.89996	5.09381	5.82035	5.44912	5.03091	5.89146	5.63693	4.75591	4.35356	4.88682	5.20396	3.88762	4.72587	6.07827	4.46787	5.283	5.77899	5.26339	5.82399	5.846	5.2767	5.68204	5.84509	5.62516	3.96348	5.15842	5.586	5.06443	5.19957	5.54156
BRCA1	3.54594	4.04696	5.13013	4.4456	4.81808	4.58713	3.70209	3.92191	4.92904	4.70205	4.15266	4.86712	3.74937	4.82632	4.46714	4.83612	4.14558	4.62904	4.98307	4.71496	4.63542	4.67955	4.32386	3.70454	4.68379	4.26774	2.75347	4.21295	4.63798	2.97124	5.4915	3.65742
BRCA2	1.78071	2.449	2.82048	2.89182	2.4392	2.59007	1.61141	2.70669	2.66187	3.0316	2.15865	3.24549	2.34737	2.00407	2.99911	3.39132	1.6561	2.75507	2.85552	2.18391	2.3585	2.78309	2.59677	2.33023	2.56487	2.21368	1.54939	2.2968	2.83588	2.87169	3.76273	2.56004
BRCC3	5.46865	4.78581	5.15305	4.93837	4.63181	4.50669	4.08487	4.26113	4.32592	5.02386	4.33094	4.90524	3.88918	4.49106	4.35757	4.84499	2.79674	4.19238	5.6952	4.00239	5.71906	5.19571	5.28251	4.34459	5.47744	5.44057	3.27369	5.16811	5.33065	4.91007	4.78915	5.1081
BRD1	3.63976	4.7141	5.29878	3.91299	4.36135	4.92573	3.84796	4.18004	4.93064	4.37331	4.26967	4.8642	4.67987	5.37866	3.71146	4.50738	3.67109	4.64615	3.95771	3.92866	4.20559	4.44325	3.88502	3.87397	4.07487	4.1181	2.78648	3.9529	4.16464	3.89494	4.38268	4.32095
BRD2	6.62961	6.89926	6.97376	6.88888	6.79132	7.31506	6.45319	6.97114	7.26894	7.31604	7.03703	6.99746	7.47346	6.91548	6.53906	7.38288	5.75507	6.51462	7.02307	6.74707	6.99558	7.12341	6.86585	7.00146	6.93398	6.89501	5.49599	6.68554	6.93514	7.05877	7.65267	7.16553
BRD3	3.28723	5.20435	5.56003	4.10094	4.90146	5.20966	4.44172	5.03735	4.8868	5.82226	4.21201	4.88487	4.56308	5.94989	4.75105	6.60515	3.97315	4.87608	5.37757	5.8063	5.38322	5.19156	5.55338	5.26511	5.40467	4.96213	4.24731	4.45212	4.41651	4.76431	5.12675	5.46148
BRD4	4.64304	5.80235	5.96168	5.07559	5.60746	5.07631	4.98282	4.6074	5.23944	5.88877	5.46255	6.11849	5.8594	5.738	4.79156	5.26275	3.54543	5.47138	5.54054	5.22186	5.12595	5.27694	5.20163	5.27264	5.15367	5.17915	4.70919	5.40365	5.42158	5.43422	5.88462	4.55023
BRD7	5.64106	5.91173	5.91318	5.23144	4.98385	4.81595	0.129121	5.24441	5.56971	5.62896	5.49662	6.01111	5.52039	5.34563	5.07315	6.47006	4.87196	5.55392	5.07984	4.82849	4.84878	5.57891	5.98868	4.92702	4.63023	4.82177	4.56437	5.26156	5.60867	3.99606	6.14201	6.55637
BRD8	4.14951	5.80718	5.32087	5.18797	5.49513	5.87267	4.76633	5.32812	4.97075	5.71593	4.83805	5.4313	5.38769	5.8	5.28476	6.4716	4.33429	5.37674	6.06865	5.96634	6.69747	5.90884	5.76887	4.57247	6.8059	6.60132	2.96863	5.07732	5.1975	4.02093	5.89381	5.81042
BRD9	5.37044	5.55589	5.24682	5.12847	4.76445	4.78863	5.39013	4.71009	5.43781	4.96938	4.54665	5.28331	4.76663	5.5668	4.15399	5.08088	3.63974	6.0739	5.322	4.55802	5.75036	5.50315	5.03583	5.10089	5.7923	5.42038	3.04805	5.78741	5.90734	5.23902	4.80639	6.26478
BRDT	0.0570956	0.032713	0.136591	0.0156357	0.0200991	0.126716	0.0379853	0.000302518	0.0584246	0.0687869	3.02389	0.116435	0.0423927	0.0488856	0.00853172	0.000600726	0	0.0833771	0.0328201	0.0320183	0.087054	0.116538	0.0698064	0.00917483	0.0990265	0.0438687	0.0414639	0.0820442	0.0210875	0.0107242	0.05562	2.60283
BRE	4.21139	3.63672	4.58899	4.17848	4.47552	4.55743	4.50553	4.09069	4.15108	4.21208	4.18909	3.58835	3.82225	4.20343	3.58894	4.76748	2.83459	4.0405	3.69332	3.64012	4.22288	3.66254	4.14027	5.1014	4.14866	4.28972	3.1039	3.27471	4.18134	4.4272	4.52855	4.38595
BRF1	3.36017	5.15033	5.7142	3.60688	4.46934	4.94272	4.05856	4.59124	5.29943	5.23477	4.77745	5.91051	5.1555	3.86773	4.86548	5.32505	3.56469	4.43888	4.75233	4.16012	5.04855	5.75494	5.27946	3.80622	4.79035	4.95947	3.83517	4.68764	4.78468	4.49655	4.62242	3.83118
BRF2	2.84597	4.00523	4.26478	3.8959	4.03829	3.38381	3.35374	3.51412	4.15455	3.62624	3.92058	3.77676	2.77555	4.00039	3.95676	3.97525	2.75426	3.70252	2.65144	3.2511	1.99472	3.072	2.97939	3.44608	2.6944	2.07156	2.59977	2.6183	3.29698	5.1634	4.47318	2.01382
BRI3	7.01191	5.87281	5.80037	6.51171	6.0708	6.59922	6.34533	6.01968	7.03869	4.92359	5.67383	5.54796	6.76642	5.35338	6.10243	6.44833	4.39488	6.67924	6.35285	6.06591	6.54034	5.79628	6.36319	6.72351	6.43311	6.31045	5.71427	6.59349	6.87159	6.76083	6.36463	7.25223
BRI3BP	5.48772	4.1134	5.65798	4.94791	5.20271	4.7911	3.91597	4.91121	5.13377	4.63362	5.10349	5.71628	4.11696	3.9354	4.97763	5.39891	3.40898	4.43515	5.33606	4.37953	5.31139	3.98198	5.09075	5.10822	5.02045	4.83896	4.16925	4.51575	4.47122	5.36175	6.00411	5.35549
BRICD5	2.3832	4.08024	3.42819	3.58257	2.82109	4.44501	1.78188	3.73136	2.9379	3.582	2.62168	3.4465	2.95041	2.41343	2.98735	4.32075	3.65805	2.80715	5.10901	3.15418	4.70967	4.33306	4.6663	3.59154	4.08258	4.30026	2.45661	3.20255	3.73097	2.7172	4.77012	3.70426
BRINP1	0.311602	4.74497	3.98685	3.08922	3.89595	2.43832	1.15301	0.889954	5.02801	2.55022	4.30968	1.38092	2.7439	1.78338	2.09029	2.06515	3.22114	3.01021	2.30984	3.38281	3.21827	2.77102	1.72218	2.9074	2.6663	2.63676	4.34801	0.093706	0.0200906	0.188382	2.6489	1.11485
BRINP2	0.10667	1.82816	0.0249039	1.34097	0.989969	0.277859	1.19059	0.0232993	4.6445	0.935653	0.00389062	0.0463699	0.470145	2.09055	0.247195	0.0498704	3.66416	1.52392	0.7439	0.0145468	1.83813	1.99817	0.37695	2.55982	2.1551	1.99464	1.04811	2.87408	2.73157	0.00656362	0.502597	2.10271
BRINP3	0	0.143053	0.131117	0.0673766	0.0213668	0	0.0168334	1.12227	0	0.0423247	0.230607	0.137032	0	0.0175984	0	0	0	0	0	0	0.294188	0	0	0	0.0204052	0	0	0	0	0	0	0.0366845
BRIP1	2.91336	3.89201	4.32415	3.72864	4.42313	4.0497	3.14231	3.32467	4.19993	5.01622	3.09074	4.44995	4.17895	5.32286	4.53882	4.13968	3.15768	4.3593	4.25616	4.59973	4.11054	4.45628	3.69372	3.39561	4.16487	3.89119	2.56507	4.12074	4.03632	3.4027	4.45811	3.38361
BRIX1	6.75729	6.51956	5.97634	5.87418	5.13481	5.39874	6.63397	5.11601	6.31351	5.78097	5.35029	5.99814	5.53802	6.13178	4.87106	5.76535	4.42161	6.6744	5.22405	4.97189	5.46625	5.75812	5.05555	5.64705	5.40454	5.42671	4.2265	6.10936	6.18374	6.42174	4.92252	6.82848
BRK1	6.33081	6.89285	6.58366	6.73116	6.47448	6.60486	6.5159	6.02344	6.75254	6.65246	6.3243	6.42336	5.60653	6.32197	6.7336	6.6665	5.23519	7.23267	7.29777	5.72359	7.16591	7.04018	5.99271	6.9649	7.02239	7.28057	5.89121	6.58654	6.78556	6.56618	6.76379	7.58168
BRMS1	5.61317	4.72829	5.36556	5.31378	5.83419	4.92905	4.39964	5.22991	5.7027	5.42162	4.97301	5.63352	4.84149	5.85716	5.15633	5.88322	4.16664	5.11559	5.30434	5.20399	5.06101	4.95397	4.96653	5.3956	4.87088	5.09449	4.05045	5.31326	5.38717	5.53067	5.11411	5.05507
BRMS1L	3.56602	3.94513	5.07023	3.1637	4.41506	4.26874	3.66558	3.28635	3.42751	5.17895	4.56399	5.16398	4.60994	3.48943	3.4634	4.05599	2.06111	3.68992	4.03639	4.10285	4.12744	4.63132	3.21921	4.49087	4.12513	3.80875	2.4697	4.25787	4.24437	3.26538	4.61631	3.36217
BROX	4.67345	3.78326	5.158	4.84252	4.4058	5.44936	3.68521	4.05201	4.4246	4.55233	3.55132	4.55031	4.16859	3.77024	4.8172	4.9369	3.32582	4.52249	5.91588	4.31911	5.67334	4.77304	5.00617	5.09568	5.75552	5.19594	4.14235	5.21779	5.4793	4.83466	5.43665	5.29962
BRPF1	3.00818	4.2657	3.49022	3.2527	3.47684	3.37125	3.56454	3.21874	3.40537	4.0935	3.01788	3.50449	3.00081	4.34527	3.02267	3.81929	2.89608	3.87056	4.36044	2.90942	4.03604	4.31171	3.03935	3.28264	4.01409	4.05219	2.27115	3.45273	3.54427	3.39595	3.51322	3.92237
BRPF3	3.15115	4.45437	4.16968	4.47735	4.41439	5.48174	3.81712	4.69864	4.91904	4.97659	4.36016	4.08879	4.7419	4.14008	4.12052	5.37867	3.19681	3.87412	5.53348	4.65549	5.82192	4.3061	5.50522	4.219	5.36262	5.60894	3.60448	4.30452	4.90545	4.58468	4.82121	5.12842
[truncated: 14,600 more rows]

## Sheet: Supplementary Table 5
Supplementary Table 5. Differential expression of transcripts by OT sensitivity in the discovery set
[truncated: 16,102 more rows]
